# Supplementary material for: Axially Chiral 2-Hydroxybiaryls by Palladium-Catalyzed Enantioselective C–H Activation
Source: PubMed Central journal article supplement (PMC10629138; doi:10.1021/acscatal.3c03867), 2023-10-16

# Supporting Information

## Axially Chiral 2-Hydroxybiaryls by Palladium-Catalyzed Enantioselective C-H Activation

**Pablo Losada, Laura Goicoechea, José Luis Mascareñas\*, Moisés Gulías\***

**e-mail:** [jose Luis.mascarenas@usc.es](mailto:jose Luis.mascarenas@usc.es), [moises.gulias@usc.es](mailto:moises.gulias@usc.es)

Centro Singular de Investigación en Química Biológica y Materiales Moleculares (CiQUS) and Departamento de Química Orgánica, Universidad de Santiago de Compostela, 15782 Santiago de Compostela, Spain.

## Table of contents

|                                                                                          |           |
|------------------------------------------------------------------------------------------|-----------|
| <b>1. General experimental information</b> .....                                         | <b>1</b>  |
| <b>2. Obtention of 1-bromo-2-naphthols, 2-bromophenols and alkenes</b> .....             | <b>2</b>  |
| <b>3. Synthesis of starting materials</b> .....                                          | <b>3</b>  |
| 3.1. General Suzuki coupling procedure .....                                             | 3         |
| 3.2. Synthesis of 3-fluoro-[1,1'-binaphthalen]-2-ol ( <i>rac</i> -1f) .....              | 8         |
| 3.3. Synthesis of 1-([1,1'-biphenyl]-2-yl)naphthalen-2-ol ( <i>rac</i> -1m) .....        | 10        |
| 3.4. Synthesis of 2'-methyl-[1,1'-biphenyl]-2-ol (1o) .....                              | 11        |
| 3.5. Synthesis of 1-(2-methoxyphenyl)naphthalen-2-ol ( <i>rac</i> -1p) .....             | 12        |
| <b>4. Kinetic resolution of biaryl alcohols through Pd(II)-catalyzed alkenylation</b> .. | <b>13</b> |
| 4.1. Optimization of the reaction conditions .....                                       | 13        |
| 4.1.1. Temperature and time optimization .....                                           | 13        |
| 4.1.2. Chiral ligand screening .....                                                     | 14        |
| 4.1.3. Solvent screening .....                                                           | 15        |
| 4.1.4. Oxidant screening .....                                                           | 16        |
| 4.1.5. Loading studies .....                                                             | 17        |
| 4.2. Reaction scope .....                                                                | 18        |
| 4.3. Gram scale kinetic resolution of <i>rac</i> -1j .....                               | 62        |
| 4.4. Mechanistic experiments .....                                                       | 65        |
| 4.4.1. Synthesis of the deuterated starting material ( <i>d</i> <sub>7</sub> -1a) .....  | 65        |
| 4.4.2. Measurement of the KIE by parallel test method .....                              | 66        |
| <b>5. Other reactions</b> .....                                                          | <b>67</b> |
| 5.1. Attempt of desymmetrization of 1-phenyl-2-naphthol (1n) .....                       | 67        |
| 5.2. Attempt of atroposelective alkenylation of 2'-methyl-[1,1'-biphenyl]-2-ol (1o) ..   | 69        |
| 5.3. Dynamic kinetic resolution through Pd(II)-catalyzed C-H alkenylation .....          | 71        |
| <b>6. Synthetic applications of the enantioenriched biaryls</b> .....                    | <b>73</b> |
| 6.1. Triflation .....                                                                    | 73        |
| 6.2. C-P cross coupling .....                                                            | 74        |
| 6.3. Phosphine oxide reduction .....                                                     | 76        |
| 6.4. Methylation and oxidative cleavage .....                                            | 78        |
| 6.5. Oxidation of the aldehyde to the carboxylic acid .....                              | 80        |
| 6.6. Reductive amination and hydroxyl deprotection .....                                 | 82        |
| 6.7. Quaternarization of the amine .....                                                 | 84        |
| 6.8. Hydrogenation of the double bond .....                                              | 85        |
| 6.9. Amine-alcohol exchange by Smiles rearrangement .....                                | 87        |
| <b>7. Mechanistic proposal and stereomodel for the C-H activation step</b> .....         | <b>89</b> |
| <b>8. NMR Spectra</b> .....                                                              | <b>90</b> |

## 1. General experimental information

Dry solvents were obtained from Across Organics, Extra Dry over Molecular Sieves, and used without further purification. Pd(OAc)<sub>2</sub> (98%) [3375-31-1] was obtained from Strem. All other chemicals were purchased from Sigma Aldrich, Acros Organics, Alfa Aesar, Fluorochem, TCI Chemical, Fluka or BLD Pharm, and were used as received; unless NEt<sub>3</sub> and DIPEA that were distilled over CaH<sub>2</sub> and ninhydrin and CaH<sub>2</sub>, respectively. Inert-atmosphere reactions were carried out with dry solvents in flame-dried flasks. All palladium-catalyzed C-H alkenylations were carried out without precautions to elude moisture or oxygen. The abbreviation “rt” refers to a temperature between 20-25 °C. Reaction mixtures were stirred using Teflon-coated magnetic stir bars. Thin layer chromatography (TLC) was carried out on pre-coated silica gel F<sub>254</sub> plates with visualization under UV light or by dipping the plate into *p*-anisaldehyde or ceric ammonium molybdate solutions followed by heating. Column chromatography was performed on silica gel (40-60 μm) unless otherwise stated. NMR data was collected on Varian Mercury 300 MHz or Bruker AVIII 500 MHz spectrometers. Chemical shifts are given in ppm (δ) and are referenced to the residual solvent (CHCl<sub>3</sub> or DMSO). NMR data was analyzed using MestReNova NMR data processing software (<http://mestrelab.com/>). High Resolution Mass Spectra (HRMS) were performed at the CACTUS facility of the University of Santiago de Compostela on a Bruker micrOTOF spectrometer. Enantiomeric ratios (er) were determined on an Agilent HPLC 1100 Series using commercially available chiral columns. All racemic products were prepared under the same procedure than the chiral ones but with the employment of a racemic mono-protected amino acid (Boc-DL-Phe-OH) as ligand. X-ray crystallographic analysis of compound **3aa** was performed at the CACTI facility of the University of Vigo on a Bruker D8 Venture Photon II CMOS apparatus and the absolute stereochemistry of all compounds was assigned by analogy.

## 2. Obtention of 1-bromo-2-naphthols, 2-bromophenols and alkenes

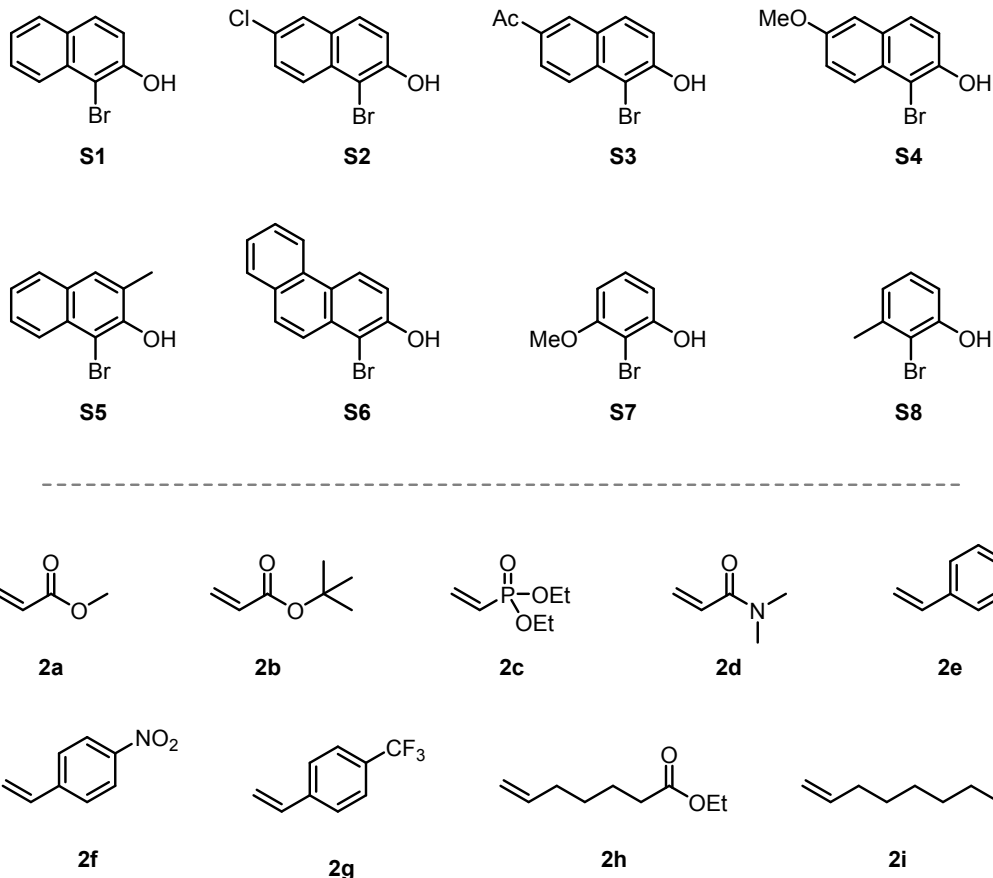

Compounds **S1**, **S7** and **S8** were bought to the corresponding commercial source. **S2** and **S4** were prepared by direct bromination of the corresponding commercially available naphthols following a reported procedure.<sup>1</sup> **S3** was synthesized from 6-methoxy-2-acetylnaphthalene by a reported methyl cleavage method<sup>2</sup> followed by the above-mentioned bromination method. **S5** was prepared from 2-bromo-3-methoxynaphthalene following a reported procedure<sup>3</sup> followed by bromination. **S6** was synthesized from 2-acetylphenanthrene following a reported 3-step synthetic route.<sup>4</sup>

All alkenes **2a-2i** were purchased to the corresponding commercial source unless **2g** that was synthesized according to a literature procedure.<sup>5</sup>

<sup>1</sup> Zuo, Z.; Wang, H.; Fan, L.; Liu, J.; Wang, Y.; Luan, X. *Angew. Chem. Int. Ed.* **2017**, *56*, 2767-2771.

<sup>2</sup> Yao, W.; Yan, Y.; Xue, L.; Zhang, C.; Li, G.; Zheng, Q.; Zhao, Y. S.; Jiang, H.; Yao, J. *Angew. Chem. Int. Ed.* **2013**, *52*, 8713-8717.

<sup>3</sup> Dyadyuk, A.; Vershinin, V.; Shalit, H.; Shalev, H.; More, N. Y.; Pappo, D. *J. Am. Chem. Soc.* **2022**, *144*, 3676-3684.

<sup>4</sup> Barbasiewicz, M.; Szadkowska, A.; Makal, A.; Jarzemska, K.; Woźniak, K.; Grela, K. *Chemistry – A European Journal* **2008**, *14*, 9330-9337.

<sup>5</sup> Zhang, J.; Tang, Y. *Adv. Synth. Catal.* **2016**, *358*, 752-764.



### 3. Synthesis of starting materials

#### 3.1. General Suzuki coupling procedure

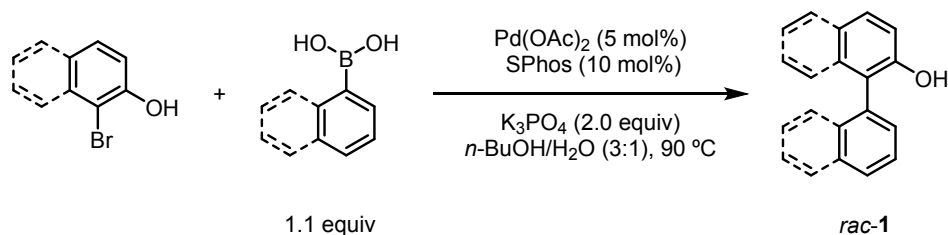

A solution of the appropriate 1-bromo-2-naphthol or 2-bromophenol (1.0 equiv), arylboronic acid (1.1 equiv), Pd(OAc)<sub>2</sub> (5.0 mol%), SPhos (10 mol%) and K<sub>3</sub>PO<sub>4</sub> (2.0 equiv) in *n*-BuOH (0.20 M) and water (0.67 M) was degassed by bubbling an argon stream and then stirred at 90 °C until full conversion was observed by TLC (typically less than 30 min is enough). After cooling to rt, the reaction mixture was partitioned between AcOEt and water. The layers were separated, and the aqueous phase was extracted with AcOEt (x2). The combined organic phase was washed with brine, dried over MgSO<sub>4</sub>, and concentrated under reduced pressure (55-60 °C). The resulting residue was purified by flash column chromatography (AcOEt/hexane) to afford the desired biaryl alcohol.

#### [1,1'-binaphthalen]-2-ol (*rac-1a*)

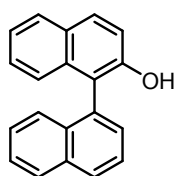

*rac-1a*

*rac-1a* was obtained after column chromatography (AcOEt/hexane 6:94 to 9:91) as a white solid (1.08 g, 89%). **Rf**: 0.60 (AcOEt/hexane 25:75, brown in *p*-anisaldehyde). **<sup>1</sup>H NMR** (300 MHz, CDCl<sub>3</sub>) δ: 8.04 (dd, *J* = 11.6, 8.0 Hz, 2H), 7.94 (dd, *J* = 11.9, 8.5 Hz, 2H), 7.69 (t, *J* = 7.6 Hz, 1H), 7.63 – 7.53 (m, 2H), 7.46 (d, *J* = 8.2 Hz, 1H), 7.43 – 7.34 (m, 3H), 7.29 (t, *J* = 7.6 Hz, 1H), 7.17 (d, *J* = 8.4 Hz, 1H), 5.00 (s, 1H). **<sup>13</sup>C NMR** (75 MHz, CDCl<sub>3</sub>) δ: 151.1 (COH), 134.3 (C), 134.0 (C), 133.0 (C), 131.6 (C), 130.0 (CH), 129.8 (CH), 129.3 (CH), 129.1 (C), 128.6 (CH), 128.1 (CH), 127.0 (CH), 126.7 (2CH), 126.1 (CH), 125.9 (CH), 125.1 (CH), 123.5 (CH), 118.9 (C), 117.6 (CH). **HRMS** (APCI+) *m/z* calcd. for C<sub>20</sub>H<sub>15</sub>O [M+H]: 271.1117; found: 271.1108.

#### 2-methoxy-1,1'-binaphthalene (*Me-1a*)

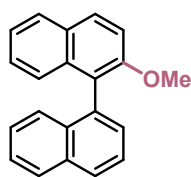

*Me-1a*

*Me-1a* was obtained from 1-iodo-2-methoxynaphthalene after column chromatography (AcOEt/hexane 3:97) as a white solid (128 mg, 90%). **Rf**: 0.53 (AcOEt/hexane 10:90, grayish blue in *p*-anisaldehyde). **<sup>1</sup>H NMR** (300 MHz, CDCl<sub>3</sub>) δ 8.02 – 7.93 (m, 3H), 7.88 (d, *J* = 8.1 Hz, 1H), 7.63 (t, *J* = 7.6 Hz, 1H), 7.45 (dd, *J* = 8.2, 3.3 Hz, 3H), 7.37 – 7.22 (m, 4H), 7.18 (t, *J* = 8.5 Hz, 1H), 3.77 (s, 3H). **<sup>13</sup>C NMR** (75 MHz, CDCl<sub>3</sub>) δ: 154.8 (COMe),

134.7 (C), 134.4 (C), 133.9 (C), 133.1 (C), 129.6 (CH), 129.2 (C), 128.6 (CH), 128.4 (CH), 127.9 (CH), 127.9 (CH), 126.5 (CH), 126.3 (CH), 126.0 (CH), 125.8 (CH), 125.7 (CH), 125.7 (CH), 123.7 (CH), 123.5 (C), 114.1 (CH), 57.0 (OCH<sub>3</sub>). **HRMS** (APCI+) *m/z* calcd. for C<sub>21</sub>H<sub>17</sub>O [M+H]: 285.1274; found: 285.1269.

#### 6-chloro-[1,1'-binaphthalen]-2-ol (*rac-1b*)

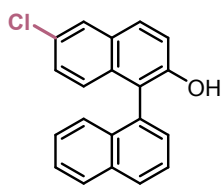

*rac-1b*

*rac-1b* was obtained after column chromatography (AcOEt/hexane 5:95 to 10:90) as a white solid (311 mg, 68%). **Rf**: 0.50 (AcOEt/hexane 25:75, brown in *p*-anisaldehyde). **<sup>1</sup>H NMR** (300 MHz, CDCl<sub>3</sub>) δ: 8.04 (d, *J* = 7.0 Hz, 1H), 7.99 (d, *J* = 8.2 Hz, 1H), 7.88 – 7.77 (m, 2H), 7.67 (t, *J* = 7.5 Hz, 1H), 7.58 – 7.50 (m, 2H), 7.40 – 7.31 (m, 3H), 7.17 (dd, *J* = 9.0, 2.2 Hz, 1H), 7.03 (d, *J* = 9.0 Hz, 1H), 4.93 (s, 1H). **<sup>13</sup>C NMR** (75 MHz, CDCl<sub>3</sub>) δ: 151.4 (COH), 134.4 (C), 132.8 (C), 132.4 (C), 131.0 (C), 129.8 (CH), 129.7 (C), 129.7 (CH), 129.3 (C), 129.1 (CH), 128.7 (CH), 127.5 (CH), 127.2 (CH), 126.8 (2CH), 126.8 (CH), 126.2 (CH), 125.7 (CH), 119.2 (C), 118.8 (CH). **HRMS** (APCI+) *m/z* calcd. for C<sub>20</sub>H<sub>13</sub>ClO [M+H]: 304.0655; found: 304.0644.

#### 6-acetyl-[1,1'-binaphthalen]-2-ol (*rac-1c*)

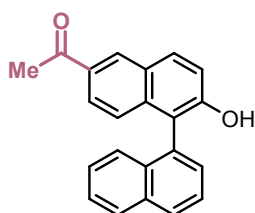

*rac-1c*

*rac-1c* was obtained after column chromatography (AcOEt/hexane 25:75 to 40:60) as a cream powder (196 mg, 50%). **Rf**: 0.50 (AcOEt/hexane 40:60, red in *p*-anisaldehyde). **<sup>1</sup>H NMR** (300 MHz, DMSO-*d*<sub>6</sub>) δ: 9.98 (s, 1H), 8.64 (d, *J* = 2.0 Hz, 1H), 8.13 (d, *J* = 8.9 Hz, 1H), 8.02 (d, *J* = 8.3 Hz, 2H), 7.71 – 7.62 (m, 2H), 7.53 – 7.38 (m, 3H), 7.32 (ddd, *J* = 8.1, 6.7, 1.3 Hz, 1H), 7.18 (d, *J* = 7.4 Hz, 1H), 6.97 (d, *J* = 8.9 Hz, 1H), 2.63 (s, 3H). **<sup>13</sup>C NMR** (75 MHz, DMSO-*d*<sub>6</sub>) δ: 197.3 (CO), 155.1 (COH), 136.4 (C), 133.8 (C), 133.4 (C), 132.2 (C), 131.2 (C), 131.1 (CH), 130.7 (CH), 128.5 (CH), 128.2 (CH), 127.6 (CH), 126.7 (C), 126.0 (CH), 125.8 (2CH), 125.5 (CH), 124.4 (CH), 124.0 (CH), 119.2 (CH), 119.1 (C), 26.5 (CH<sub>3</sub>). **HRMS** (APCI+) *m/z* calcd. for C<sub>22</sub>H<sub>17</sub>O<sub>2</sub> [M+H]: 313.1223; found: 313.1219.

#### 6-methoxy-[1,1'-binaphthalen]-2-ol (*rac-1d*)

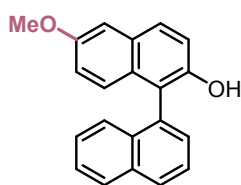

*rac-1d*

*rac-1d* was obtained after column chromatography (AcOEt/hexane 15:85) as a white solid (478 mg, 78%). **Rf**: 0.68 (AcOEt/hexane 20:80, dark green in *p*-anisaldehyde). **<sup>1</sup>H NMR** (300 MHz, CDCl<sub>3</sub>) δ: 8.02 (d, *J* = 8.2 Hz, 1H), 7.98 (d, *J* = 8.3 Hz, 1H), 7.81 (d, *J* = 8.9 Hz, 1H), 7.66 (t, *J* = 7.6 Hz, 1H), 7.58 – 7.49 (m, 2H), 7.44 – 7.30 (m, 3H), 7.21 (d, *J* = 2.6 Hz, 1H), 7.03 (d, *J* = 9.2 Hz, 1H), 6.93 (dd, *J* = 9.2, 2.6 Hz, 1H),

4.79 (s, 1H), 3.91 (s, 3H).  $^{13}\text{C}$  NMR (75 MHz,  $\text{CDCl}_3$ )  $\delta$ : 156.0 (COMe), 149.5 (COH), 134.3 (C), 132.9 (C), 131.7 (C), 129.9 (C), 129.7 (CH), 129.3 (CH), 128.6 (CH), 128.6 (CH), 128.5 (C), 127.0 (CH), 126.7 (2CH), 126.1 (CH), 125.9 (CH), 119.2 (C), 119.1 (CH), 118.0 (CH), 106.5 (CH), 55.5 ( $\text{OCH}_3$ ). HRMS (APCI+)  $m/z$  calcd. for  $\text{C}_{21}\text{H}_{17}\text{O}_2$  [M+H]: 301.1223; found: 301.1234.

### 3-methyl-[1,1'-binaphthalen]-2-ol (*rac-1e*)

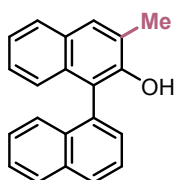

*rac-1e*

*rac-1e* was obtained after column chromatography (AcOEt/hexane 5:95) as a white solid (235 mg, 58%). Rf: 0.66 (AcOEt/hexane 20:80, brown in *p*-anisaldehyde).  $^1\text{H}$  NMR (300 MHz,  $\text{CDCl}_3$ )  $\delta$ : 8.05 (d,  $J$  = 8.2 Hz, 1H), 8.00 (d,  $J$  = 8.4 Hz, 1H), 7.81 (d,  $J$  = 8.3 Hz, 1H), 7.77 (s, 1H), 7.72 – 7.64 (m, 1H), 7.59 – 7.51 (m, 2H), 7.44 – 7.29 (m, 3H), 7.19 (ddd,  $J$  = 8.2, 6.7, 1.4 Hz, 1H), 7.05 (d,  $J$  = 7.6 Hz, 1H), 4.99 (s, 1H), 2.53 (s, 3H).  $^{13}\text{C}$  NMR (75 MHz,  $\text{CDCl}_3$ )  $\delta$ : 150.4 (COH), 134.4 (C), 133.0 (C), 132.8 (C), 132.0 (C), 129.8 (CH), 129.4 (CH), 129.4 (CH), 129.0 (C), 128.6 (CH), 127.4 (CH), 127.0 (C), 126.8 (CH), 126.7 (CH), 126.2 (CH), 126.0 (CH), 125.7 (CH), 124.9 (CH), 123.4 (CH), 118.4 (C), 17.2 ( $\text{CH}_3$ ). HRMS (APCI+)  $m/z$  calcd. for  $\text{C}_{21}\text{H}_{17}\text{O}$  [M+H]: 285.1274; found: 285.1271.

### 1-(naphthalen-1-yl)phenanthren-2-ol (*rac-1g*)

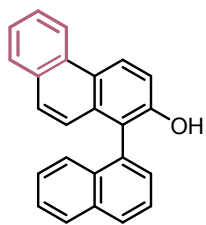

*rac-1g*

*rac-1g* was obtained after column chromatography (AcOEt/hexane 10:90) as a white powder (143 mg, 81%). Rf: 0.60 (AcOEt/hexane 20:80, dark brown in *p*-anisaldehyde).  $^1\text{H}$  NMR (300 MHz,  $\text{CDCl}_3$ )  $\delta$ : 8.79 (d,  $J$  = 9.1 Hz, 1H), 8.72 (d,  $J$  = 8.3 Hz, 1H), 8.06 (d,  $J$  = 8.2 Hz, 1H), 8.01 (d,  $J$  = 8.2 Hz, 1H), 7.82 (d,  $J$  = 7.9 Hz, 1H), 7.74 – 7.65 (m, 2H), 7.62 – 7.47 (m, 5H), 7.45 – 7.32 (m, 2H), 7.09 (d,  $J$  = 9.2 Hz, 1H), 4.97 (s, 1H).  $^{13}\text{C}$  NMR (75 MHz,  $\text{CDCl}_3$ )  $\delta$ : 152.0 (COH), 134.3 (C), 133.1 (C), 132.6 (C), 131.8 (C), 130.8 (C), 130.7 (C), 129.7 (CH), 129.5 (CH), 128.6 (2CH), 127.8 (CH), 127.1 (CH), 127.0 (CH), 126.8 (CH), 126.2 (CH), 125.9 (2CH), 124.8 (C), 124.6 (CH), 124.4 (CH), 122.4 (CH), 121.1 (C), 116.5 (CH). HRMS (APCI+)  $m/z$  calcd. for  $\text{C}_{24}\text{H}_{17}\text{O}$  [M+H]: 321.1274; found: 321.1282.

### 3-methoxy-2-(naphthalen-1-yl)phenol (*rac-1h*)

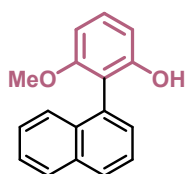

*rac-1h*

*rac-1h* was obtained after column chromatography (AcOEt/hexane 4:96) as colorless crystals (67.8 mg, 21%). Rf: 0.20 (AcOEt/hexane 10:90, orange in *p*-anisaldehyde).  $^1\text{H}$  NMR (500 MHz,  $\text{CDCl}_3$ )  $\delta$ : 7.93 (t,  $J$  = 8.8 Hz, 2H), 7.59 (dd,  $J$  = 8.2, 7.0 Hz, 1H), 7.55 (d,  $J$  = 8.4 Hz, 1H), 7.51 (ddd,  $J$  = 8.2, 6.8, 1.2 Hz, 1H), 7.47 (dd,  $J$  = 6.9, 1.2 Hz, 1H), 7.42

(ddd,  $J = 8.3, 6.8, 1.3$  Hz, 1H), 7.33 (t,  $J = 8.3$  Hz, 1H), 6.74 (d,  $J = 8.3$  Hz, 1H), 6.65 (d,  $J = 8.4$  Hz, 1H), 4.71 (s, 1H), 3.65 (s, 3H).  $^{13}\text{C NMR}$  (126 MHz,  $\text{CDCl}_3$ )  $\delta$ : 158.3 (COMe), 154.5 (COH), 134.2 (C), 132.6 (C), 130.1 (C), 129.7 (CH), 129.1 (CH), 129.0 (CH), 128.5 (CH), 126.7 (CH), 126.4 (CH), 126.0 (CH), 125.8 (CH), 115.2 (C), 108.5 (CH), 103.3 (CH), 56.0 ( $\text{OCH}_3$ ). **HRMS** (APCI+)  $m/z$  calcd. for  $\text{C}_{17}\text{H}_{14}\text{O}_2$   $[\text{M}+\text{H}]$ : 251.1067; found: 251.1069.

### 3-methyl-2-(naphthalen-1-yl)phenol (*rac-1i*)

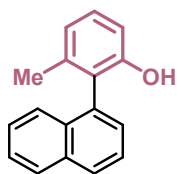

*rac-1i*

*rac-1i* was obtained after column chromatography (AcOEt/hexane 5:95 to 7:93) as a white powder (311 mg, 88%). **Rf**: 0.60 (AcOEt/hexane 25:75, pink in *p*-anisaldehyde).  $^1\text{H NMR}$  (300 MHz,  $\text{CDCl}_3$ )  $\delta$ : 8.00 – 7.91 (m, 2H), 7.63 – 7.40 (m, 5H), 7.28 (t,  $J = 7.6$  Hz, 1H), 6.98 – 6.90 (m, 2H), 4.56 (s, 1H), 1.95 (s, 3H).  $^{13}\text{C NMR}$  (75 MHz,  $\text{CDCl}_3$ )  $\delta$ : 153.5 (COH), 138.4 (C), 134.3 (C), 132.8 (C), 132.3 (C), 129.1 (2CH), 128.6 (CH), 128.5 (CH), 127.0 (CH), 126.6 (CH), 126.1 (CH), 126.0 (C), 125.4 (CH), 122.1 (CH), 112.9 (CH), 20.2 ( $\text{CH}_3$ ). **HRMS** (APCI+)  $m/z$  calcd. for  $\text{C}_{17}\text{H}_{15}\text{O}$   $[\text{M}+\text{H}]$ : 235.1117; found: 235.1112.

### 1-(*o*-tolyl)naphthalen-2-ol (*rac-1j*)

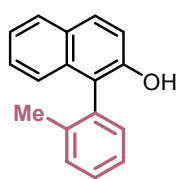

*rac-1j*

*rac-1j* was obtained using PhMe/ $\text{H}_2\text{O}$  (3:1, 0.38 M) as solvent after column chromatography (AcOEt/hexane 5:95 to 7:93) as a white powder (1.25 g, 89%). **Rf**: 0.65 (AcOEt/hexane 25:75, greyish blue in *p*-anisaldehyde).  $^1\text{H NMR}$  (300 MHz,  $\text{CDCl}_3$ )  $\delta$ : 7.88 – 7.79 (m, 2H), 7.49 – 7.42 (m, 2H), 7.42 – 7.37 (m, 1H), 7.37 – 7.32 (m, 2H), 7.32 – 7.27 (m, 2H), 7.21 (dt,  $J = 6.2, 3.5$  Hz, 1H), 4.93 (s, 1H), 2.05 (s, 3H).  $^{13}\text{C NMR}$  (75 MHz,  $\text{CDCl}_3$ )  $\delta$ : 150.2 (COH), 139.1 (C), 133.2 (C), 133.2 (C), 131.7 (CH), 131.1 (CH), 129.6 (CH), 129.1 (CH), 128.2 (CH), 127.0 (CH), 126.7 (CH), 124.6 (CH), 123.4 (CH), 120.4 (C), 117.4 (CH), 19.7 ( $\text{CH}_3$ ). **HRMS** (APCI+)  $m/z$  calcd. for  $\text{C}_{17}\text{H}_{15}\text{O}$   $[\text{M}+\text{H}]$ : 235.1117; found: 235.1111.

### 1-(4-methoxy-2-methylphenyl)naphthalen-2-ol (*rac-1k*)

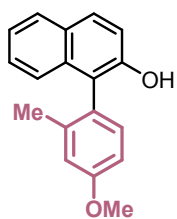

*rac-1k*

*rac-1k* was obtained after column chromatography (AcOEt/hexane 5:95) as a cream powder (219 mg, 55%). **Rf**: 0.58 (AcOEt/hexane 25:75, greyish blue in *p*-anisaldehyde).  $^1\text{H NMR}$  (300 MHz,  $\text{CDCl}_3$ )  $\delta$ : 7.85 – 7.77 (m, 2H), 7.37 – 7.30 (m, 2H), 7.29 – 7.17 (m, 3H), 6.99 (d,  $J = 2.8$  Hz, 1H), 6.93 (dd,  $J = 8.3, 2.7$  Hz, 1H), 4.97 (s, 1H), 3.90 (s, 3H), 2.00 (s, 3H).  $^{13}\text{C NMR}$  (75 MHz,  $\text{CDCl}_3$ )  $\delta$ : 160.2 (COMe), 150.6 (COH), 140.6 (C), 133.67 (C), 132.8 (CH), 129.4 (CH), 129.1 (C), 128.2 (CH), 126.6 (CH), 125.0 (C),

124.6 (CH), 123.4 (CH), 120.0 (C), 117.3 (CH), 116.6 (CH), 112.4 (CH), 55.5 (OCH<sub>3</sub>), 20.0 (CH<sub>3</sub>). **HRMS** (APCI+) *m/z* calcd. for C<sub>18</sub>H<sub>17</sub>O<sub>2</sub> [M+H]: 265.1123; found: 265.1218.

#### 1-(4-fluoro-2-methylphenyl)naphthalen-2-ol (*rac-1l*)

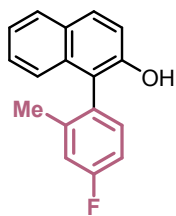

*rac-1l*

*rac-1l* was obtained after column chromatography (AcOEt/hexane 5:95 to 6:94) as a white powder (220 mg, 58%). **Rf**: 0.62 (AcOEt/hexane 25:75, grey in *p*-anisaldehyde). **<sup>1</sup>H NMR** (300 MHz, CDCl<sub>3</sub>) δ: 7.88 – 7.79 (m, 2H), 7.38 – 7.30 (m, 2H), 7.29 – 7.23 (m, 2H), 7.21 – 7.13 (m, 2H), 7.13 – 7.05 (m, 1H), 4.84 (s, 1H), 2.02 (s, 3H). **<sup>13</sup>C NMR** (75 MHz, CDCl<sub>3</sub>) δ: 164.9 (CF), 150.5 (COH), 141.8 (C), 133.4 (d, *J* = 8.3 Hz, CH), 133.3 (C), 129.8 (CH), 129.2 (C), 128.3 (CH), 126.9 (CH), 124.3 (CH), 123.6 (CH), 117.8 (d, *J* = 21.0 Hz, CH), 117.4 (CH), 117.4 (C), 113.9 (d, *J* = 21.0 Hz, CH), 19.9 (CH<sub>3</sub>). **<sup>19</sup>F NMR** (282 MHz, CDCl<sub>3</sub>) δ: -113.5 (q, *J* = 8.7 Hz). **HRMS** (APCI+) *m/z* calcd. for C<sub>17</sub>H<sub>14</sub>FO [M+H]: 253.1023; found: 253.1018.

#### 1-phenylnaphthalen-2-ol (**1n**)

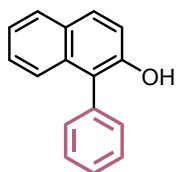

**1n**

**1n** was obtained after column chromatography (AcOEt/hexane 5:95 to 8:92) as a light-yellow solid (723 mg, 59%). **Rf**: 0.62 (AcOEt/hexane 25:75, garnet in *p*-anisaldehyde). **<sup>1</sup>H NMR** (300 MHz, CDCl<sub>3</sub>) δ: 7.86 – 7.76 (m, 2H), 7.59 (m, 2H), 7.53 (d, *J* = 6.9 Hz, 1H), 7.42 (m, 3H), 7.37 – 7.30 (m, 2H), 7.27 (m, 1H), 5.13 (s, 1H). **<sup>13</sup>C NMR** (75 MHz, CDCl<sub>3</sub>) δ: 150.3 (COH), 134.3 (C), 133.4 (C), 131.3 (2CH), 129.7 (2CH), 129.6 (CH), 129.0 (C), 128.6 (CH), 128.2 (CH), 126.6 (CH), 124.7 (CH), 123.4 (CH), 121.1 (C), 117.5 (CH). **HRMS** (APCI+) *m/z* calcd. for C<sub>16</sub>H<sub>13</sub>O [M+H]: 221.0961; found: 221.0954.

### 3.2. Synthesis of 3-fluoro-[1,1'-binaphthalen]-2-ol (*rac*-1f)

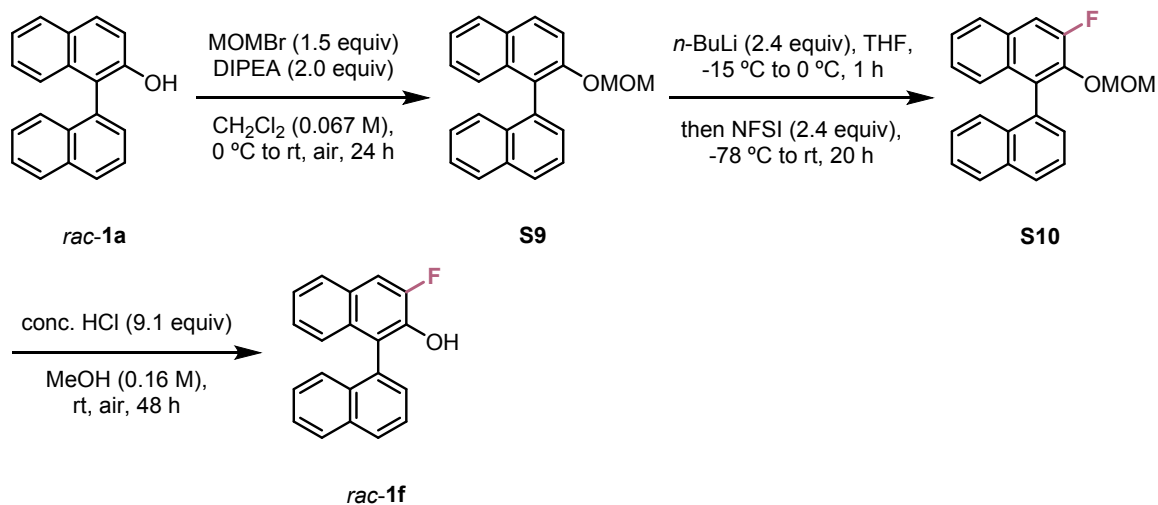

To a solution of *rac*-1a (925 mg, 3.42 mmol, 1.0 equiv) and MOMBr (641 mg, 5.13 mmol, 1.5 equiv) in CH<sub>2</sub>Cl<sub>2</sub> (51.3 mL) at 0 °C, DIPEA (1.2 mL, 6.84 mmol, 2.0 equiv) was dropwise added, and the mixture was stirred at rt under air for 24 h. The reaction mixture was quenched with water and the layers were separated. The organic phase was washed with 0.5 M HCl, water, 2.0 M NaOH, and brine; dried over anhydrous Na<sub>2</sub>SO<sub>4</sub> and concentrated under reduced pressure. The resulting residue was purified by flash column chromatography (AcOEt/hexane 4:96) to afford 674.5 mg (63%) of **S9** as a yellow sticky solid. **Rf**: 0.76 (AcOEt/hexane 25:75, dark green in *p*-anisaldehyde). **<sup>1</sup>H NMR** (300 MHz, CDCl<sub>3</sub>): δ: 7.97 (d, *J* = 8.9 Hz, 2H), 7.89 (d, *J* = 8.2 Hz, 1H), 7.63 (d, *J* = 8.3 Hz, 1H), 7.58 (d, *J* = 9.1 Hz, 1H), 7.53 – 7.42 (m, 2H), 7.35 (d, *J* = 7.2 Hz, 2H), 7.32 – 7.14 (m, 4H), 5.03 (s, 2H), 3.15 (s, 3H).

To a solution of **S9** (650 mg, 2.07 mmol, 1.0 equiv) in THF (10.5 mL) under nitrogen at -15 °C, *n*-BuLi (2.5 M in hexanes, 2.0 mL, 4.96 mmol, 2.4 equiv) was added, and the resulting mixture was stirred at 0 °C for 1 h. The reaction mixture was cooled down to -78 °C and a solution of NFSI (1.57 g, 4.96 mmol, 2.4 equiv) in THF (10.5 mL) was added. After stirring for 20 h at rt, the reaction was quenched with water and diluted with AcOEt. The layers were separated, and the organic phase was washed with sat. aq. NaHCO<sub>3</sub>, water, and brine; dried over Na<sub>2</sub>SO<sub>4</sub> and concentrated under reduced pressure. The resulting residue was purified by flash column chromatography (AcOEt/hexane 3:97) to afford 441 mg (64%) of **S10** as a yellow sticky solid. **Rf**: 0.80 (AcOEt/hexane 20:80, green in *p*-anisaldehyde). **<sup>1</sup>H NMR** (300 MHz, CDCl<sub>3</sub>): δ: 7.98 – 7.92 (m, 2H), 7.88 (d, *J* = 8.1 Hz, 1H), 7.61 (d, *J* = 8.3 Hz, 1H), 7.56 (d, *J* = 9.1 Hz, 1H), 7.49 – 7.41 (m, 2H), 7.39 – 7.32 (m, 2H), 7.31 – 7.22 (m, 2H), 7.19 (t, *J* = 6.9 Hz, 1H), 5.02 (s, 2H), 3.15 (s, 3H).

To a solution of **S10** (332 mg, 1.32 mmol, 1.0 equiv) in MeOH (8.3 mL, 0.16 M), conc. HCl (1.0 mL, 12 mmol, 9.1 equiv) was slowly added and the mixture was stirred at rt under air for 48 h. The reaction mixture was neutralized with sat. aq. NaHCO<sub>3</sub> and extracted with AcOEt (x3). The combined organic phase was dried over Na<sub>2</sub>SO<sub>4</sub> and concentrated under reduced pressure. The resulting residue was purified by flash column chromatography (AcOEt/hexane 5:95 to 10:90) to afford 346 mg (91%) of *rac*-**1f** as a white solid. **Rf**: 0.40 (AcOEt/hexane 20:80, green in *p*-anisaldehyde). **<sup>1</sup>H NMR** (500 MHz, CDCl<sub>3</sub>) δ: 8.04 (d, *J* = 8.3 Hz, 1H), 7.99 (d, *J* = 8.2 Hz, 1H), 7.81 (d, *J* = 8.2 Hz, 1H), 7.71 – 7.62 (m, 2H), 7.58 – 7.49 (m, 2H), 7.41 – 7.32 (m, 3H), 7.22 (t, *J* = 7.6 Hz 1H), 7.12 (d, *J* = 8.5 Hz, 1H), 5.10 (d, *J* = 1.7 Hz, 1H). **<sup>13</sup>C NMR** (126 MHz, CDCl<sub>3</sub>) δ: 151.3 (d, *J* = 246.6 Hz, CF), 141.1 (d, *J* = 15.0, COH), 134.2 (C), 132.7 (C), 131.2 (d, *J* = 2.9 Hz, C), 130.9 (C), 129.5 (CH), 129.4 (CH), 128.7 (CH), 128.5 (d, *J* = 8.4 Hz, C), 127.5 (d, *J* = 5.4 Hz, CH), 127.0 (CH), 126.6 (CH), 126.0 (CH), 125.9 (d, *J* = 2.6 Hz, CH), 125.8 (CH), 125.4 (d, *J* = 1.9 Hz, CH), 124.7 (CH), 122.4 (d, *J* = 2.2 Hz, C), 112.2 (d, *J* = 17.4 Hz, CH). **<sup>19</sup>F NMR** (282 MHz, CDCl<sub>3</sub>): δ: -135.4. **HRMS** (APCI+) *m/z* calcd. for C<sub>20</sub>H<sub>14</sub>FO [M+H]: 289.1023; found: 289.1015.

### 3.3. Synthesis of 1-([1,1'-biphenyl]-2-yl)naphthalen-2-ol (*rac-1m*)

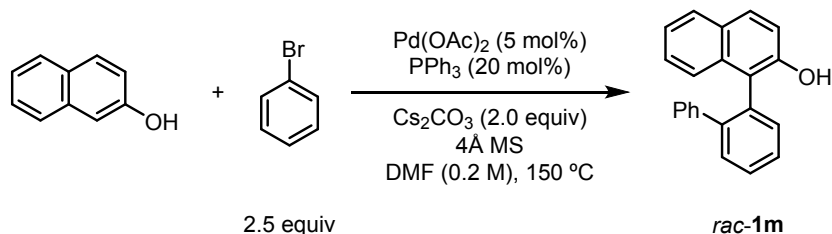

Following a literature procedure<sup>6</sup>, a mixture of 2-naphthol (1.44 g, 10.0 mmol, 1.0 equiv), Pd(OAc)<sub>2</sub> (112 mg, 5.0 mol%), PPh<sub>3</sub> (525 mg, 20 mol%), Cs<sub>2</sub>CO<sub>3</sub> (6.52 g, 20.0 mmol, 2.0 equiv), and 4 Å MS (2.0 g) in DMF (50 mL) was degassed by bubbling an argon stream. Bromobenzene (1.5 mL, 25.0 mmol, 2.5 equiv) was added, and the mixture was stirred at 150 °C for 16 h. After cooling to rt, the reaction mixture was poured into 10% HCl (50 mL) and extracted with Et<sub>2</sub>O (x3). The combined organic phase was washed with water, dried over Na<sub>2</sub>SO<sub>4</sub>, and concentrated under reduced pressure. The resulting residue was purified by flash column chromatography (AcOEt/hexane 4:96) to afford 1.05 g (36%) of *rac-1m* as a white powder. **Rf**: 0.45 (AcOEt/hexane 20:80, red in *p*-anisaldehyde). **<sup>1</sup>H NMR** (500 MHz, CDCl<sub>3</sub>) δ: 7.75 (d, *J* = 7.9 Hz, 1H), 7.70 (d, *J* = 8.8 Hz, 1H), 7.66 – 7.56 (m, 2H), 7.55 (td, *J* = 7.4, 1.8 Hz, 1H), 7.42 (d, *J* = 7.5 Hz, 1H), 7.38 (d, *J* = 8.2 Hz, 1H), 7.35 – 7.25 (m, 2H), 7.14 – 7.04 (m, 6H), 4.96 (s, 1H). **<sup>13</sup>C NMR** (126 MHz, CDCl<sub>3</sub>) δ: 150.2 (COH), 143.6 (C), 140.4 (C), 133.7 (C), 132.8 (CH), 132.3 (C), 131.1 (CH), 129.3 (CH), 128.9 (C), 128.6 (2CH), 128.4 (CH), 128.1 (CH), 127.9 (2CH), 127.6 (CH), 127.2 (CH), 126.6 (CH), 124.9 (CH), 123.3 (CH), 120.6 (C), 117.3 (CH). **HRMS** (APCI+) *m/z* calcd. for C<sub>22</sub>H<sub>16</sub>O [M+H]: 297.1274; found: 297.1272.

<sup>6</sup> Satoh, T.; Inoh, J.; Kawamura, Y.; Kawamura, Y.; Miura, M.; Nomura, M. *Bull. Chem. Soc. Jpn.* **1998**, *71*, 2239-2246.



### 3.4. Synthesis of 2'-methyl-[1,1'-biphenyl]-2-ol (**1o**)

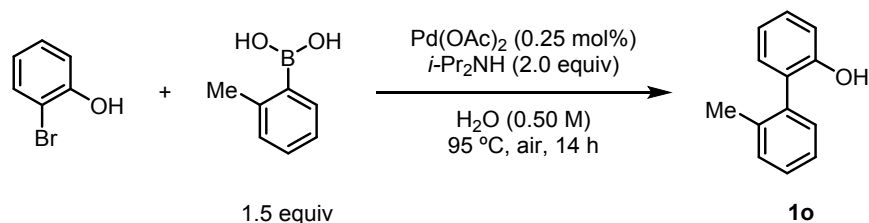

Following a literature procedure<sup>7</sup>, a mixture of 2-bromophenol (0.346 g, 2.0 mmol, 1.0 equiv), *o*-tolylboronic acid (0.408 g, 3.0 mmol, 1.5 equiv), Pd(OAc)<sub>2</sub> (1.1 mg, 0.005 mmol, 0.25 mol%) and *i*-Pr<sub>2</sub>NH (0.56 mL, 4.0 mmol, 2.0 equiv) in H<sub>2</sub>O (4.0 mL) was stirred at 95 °C under air for 14 h. The mixture was quenched with brine and extracted with AcOEt (x3). The combined organic phase was dried over Na<sub>2</sub>SO<sub>4</sub> and concentrated under reduced pressure. The resulting residue was purified by flash column chromatography (AcOEt/hexane 1:99) to afford 223.3 mg (61%) of **1o** as a colorless oil. **Rf**: 0.26 (AcOEt/hexane 5:95, orange in *p*-anisaldehyde). **<sup>1</sup>H NMR** (300 MHz, CDCl<sub>3</sub>) δ: 7.38 – 7.21 (m, 5H), 7.12 (d, *J* = 7.3, 1.8 Hz, 1H), 7.00 (d, *J* = 7.2 Hz, 2H), 4.75 (s, 1H), 2.18 (s, 3H). **<sup>13</sup>C NMR** (75 MHz, CDCl<sub>3</sub>) δ: 152.7 (COH), 137.6 (C), 135.9 (C), 130.9 (CH), 130.6 (CH), 130.3 (CH), 129.3 (CH), 182.7 (CH), 127.9 (C), 126.6 (CH), 120.6 (CH), 115.4 (CH), 19.9 (CH<sub>3</sub>). **HRMS** (APCI+) *m/z* calcd. for C<sub>13</sub>H<sub>13</sub>O [M+H]: 185.0961; found: 185.0955.

<sup>7</sup> Duan, S.; Xu, Y.; Zhang, X.; Fan, X. *Chem. Commun.* **2016**, 52, 10529-10532.

### 3.5. Synthesis of 1-(2-methoxyphenyl)naphthalen-2-ol (*rac-1p*)

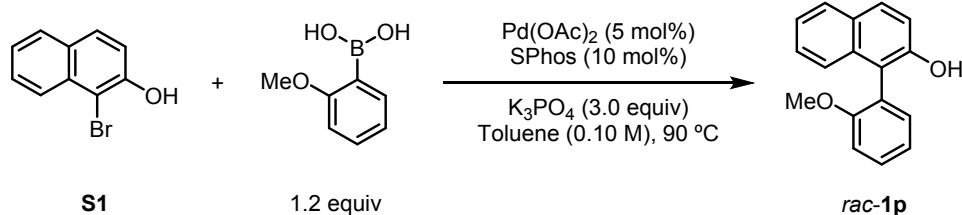

A mixture of **S1** (0.446 g, 2.0 mmol, 1.0 equiv), Pd(OAc)<sub>2</sub> (22.5 mg, 0.10 mmol, 5 mol%), SPhos (82.1 mg, 0.20 mmol, 10 mol%) and K<sub>3</sub>PO<sub>4</sub> (1.27 g, 6.0 mmol, 3.0 equiv) in toluene (20 mL) was degassed by bubbling argon. (2-methoxyphenyl)boronic acid (0.365 g, 2.4 mmol 1.2 equiv) was added portionwise, and the mixture was stirred at 90 °C for 20 h. After cooling to rt, the reaction mixture was partitioned between water and CH<sub>2</sub>Cl<sub>2</sub>. The layers were separated, and the aqueous phase was extracted with CH<sub>2</sub>Cl<sub>2</sub> (x2). The combined organic phase was dried with Na<sub>2</sub>SO<sub>4</sub> and concentrated under reduced pressure. The resulting residue was purified by flash column chromatography (AcOEt/hexane 2.5:97.5 to 10:90) to afford 132.5 mg (27%) of *rac-1p* as a sticky red solid. **Rf**: 0.30 (AcOEt/hexane 20:80, dark red in *p*-anisaldehyde). **<sup>1</sup>H NMR** (500 MHz, CDCl<sub>3</sub>) δ: 7.84 – 7.79 (m, 2H), 7.51 (td, *J* = 7.9, 1.9 Hz, 1H), 7.34 (m, 4H), 7.28 (d, *J* = 8.9 Hz, 1H), 7.19 – 7.13 (m, 2H), 5.28 (s, 1H), 3.76 (s, 3H). **<sup>13</sup>C NMR** (126 MHz, CDCl<sub>3</sub>) δ: 158.0 (COH), 150.8 (C), 133.6 (C), 133.5 (CH), 130.4 (CH), 129.6 (CH), 129.3 (C), 128.2 (CH), 126.4 (CH), 125.0 (CH), 123.3 (CH), 122.7 (C), 121.7 (CH), 118.0 (C), 117.9 (CH), 112.1 (CH), 56.0 (OCH<sub>3</sub>). **HRMS** (APCI+) *m/z* calcd. for C<sub>17</sub>H<sub>14</sub>O<sub>2</sub> [M+H]: 251.1067; found: 251.1067.

## 4. Kinetic resolution of biaryl alcohols through Pd(II)-catalyzed C-H alkenylation

### 4.1. Optimization of the reaction conditions

#### 4.1.1. Temperature and time optimization

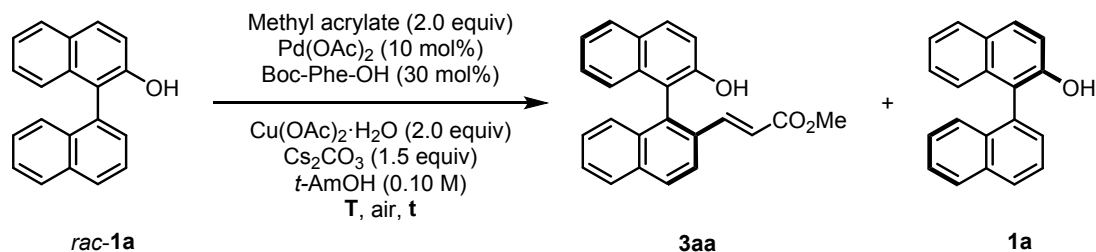

| Entry    | T (°C)    | t (h)     | 1a yield (%) | 1a er       | 3aa yield (%) | 3aa er      |
|----------|-----------|-----------|--------------|-------------|---------------|-------------|
| 1        | 80        | 2.5       | 40           | 92:8        | 40            | 94:6        |
| 2        | 60        | 2.5       | 50           | 82:18       | 43            | 94:6        |
| <b>3</b> | <b>45</b> | <b>24</b> | <b>40</b>    | <b>93:7</b> | <b>42</b>     | <b>95:5</b> |
| 4        | 35        | 25.5      | 43           | 82:18       | 32            | 97.5:2.5    |
| 5        | 21        | 24        | 60           | 63:37       | 20            | 98:2        |

**Table S1. Temperature and time optimization.**

Reaction conditions: **1a** (0.1 mmol), **2a** (0.2 mmol), Pd(OAc)<sub>2</sub> (10 mol%), Boc-Phe-OH (30 mol%), Cu(OAc)<sub>2</sub>·H<sub>2</sub>O (2.0 equiv), Cs<sub>2</sub>CO<sub>3</sub> (1.5 equiv), *t*-AmOH (1.0 mL), air. Isolated yields. Enantiomeric ratios (er) were determined by chiral HPLC analysis of the isolated pure product.

#### 4.1.2. Chiral ligand screening

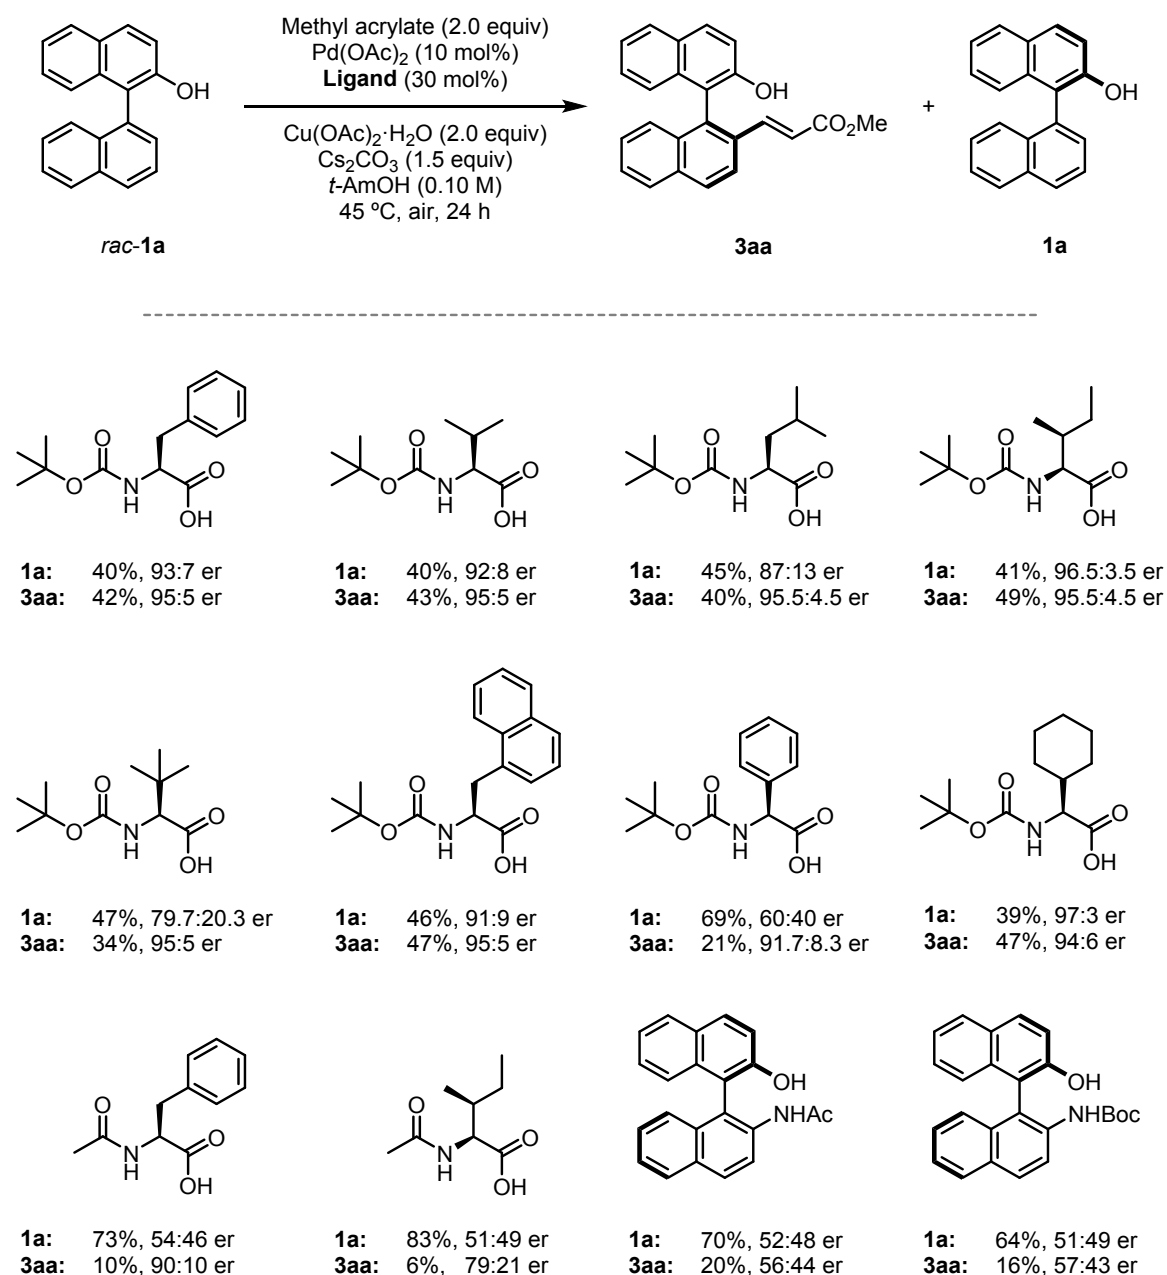

**Table S2. MPAA and NOBINAc-type chiral ligand screening.**

Reaction conditions: **1a** (0.1 mmol), **2a** (0.2 mmol),  $\text{Pd}(\text{OAc})_2$  (10 mol%), ligand (30 mol%),  $\text{Cu}(\text{OAc})_2 \cdot \text{H}_2\text{O}$  (2.0 equiv),  $\text{Cs}_2\text{CO}_3$  (1.5 equiv), *t*-AmOH (1.0 mL), air, 45 °C, 24 h. Isolated yields. Enantiomeric ratios (er) were determined by chiral HPLC analysis of the isolated pure product.

### 4.1.3. Solvent screening

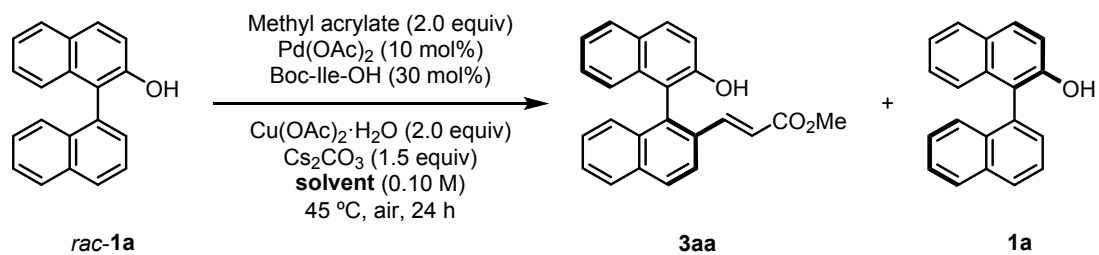

| Entry | Solvent        | <b>1a</b> yield (%) | <b>1a</b> er | <b>3aa</b> yield (%) | <b>3aa</b> er |
|-------|----------------|---------------------|--------------|----------------------|---------------|
| 1     | <i>t</i> -AmOH | 41                  | 96.5:3.5     | 49                   | 95.5:4.5      |
| 2     | MeOH           | 70                  | 54.5:45.5    | 8                    | 96:4          |
| 3     | HFIP           | 62                  | 50:50        | 18                   | 50:50         |
| 4     | MeCN           | 43                  | 90:10        | 41                   | 94:6          |

**Table S3. Solvent screening.**

Reaction conditions: **1a** (0.1 mmol), **2a** (0.2 mmol), Pd(OAc)<sub>2</sub> (10 mol%), Boc-Ile-OH (30 mol%), Cu(OAc)<sub>2</sub>·H<sub>2</sub>O (2.0 equiv), Cs<sub>2</sub>CO<sub>3</sub> (1.5 equiv), solvent (1.0 mL), air, 45 °C, 24 h. Isolated yields. Enantiomeric ratios (er) were determined by chiral HPLC analysis of the isolated pure product.

#### 4.1.4. Oxidant screening

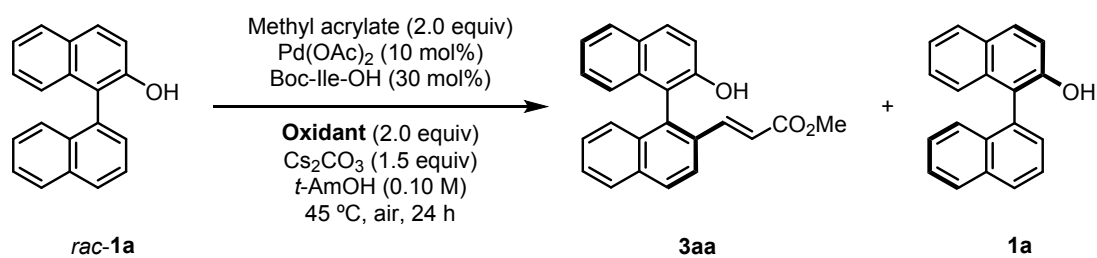

| Entry | Oxidant                                   | <b>1a</b> yield (%) | <b>1a</b> er    | <b>3aa</b> yield (%) | <b>3aa</b> er   |
|-------|-------------------------------------------|---------------------|-----------------|----------------------|-----------------|
| 1     | <b>Cu(OAc)<sub>2</sub>·H<sub>2</sub>O</b> | <b>41</b>           | <b>96.5:3.5</b> | <b>49</b>            | <b>95.5:4.5</b> |
| 2     | AgOAc                                     | 0                   | -               | 0                    | -               |
| 3     | Ag <sub>3</sub> PO <sub>4</sub>           | 30                  | 73:27           | 38                   | 93:7            |
| 4     | Ag <sub>2</sub> CO <sub>3</sub>           | 0                   | -               | 0                    | -               |

**Table S4. Oxidant screening.**

Reaction conditions: **1a** (0.1 mmol), **2a** (0.2 mmol), Pd(OAc)<sub>2</sub> (10 mol%), Boc-Ile-OH (30 mol%), Oxidant (2.0 equiv), Cs<sub>2</sub>CO<sub>3</sub> (1.5 equiv), *t*-AmOH (1.0 mL), air, 45 °C, 24 h. Isolated yields. Enantiomeric ratios (er) were determined by chiral HPLC analysis of the isolated pure product.

#### 4.1.5. Loading studies

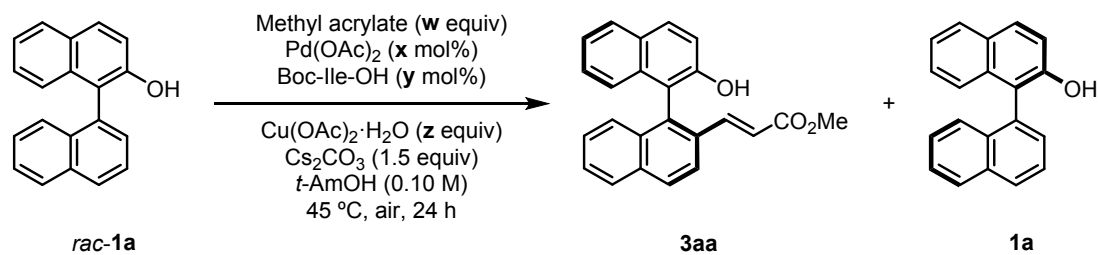

| Entry | w | z   | x  | y  | <b>1a</b> yield (%) | SM er    | <b>3aa</b> yield (%) | <b>3aa</b> er |
|-------|---|-----|----|----|---------------------|----------|----------------------|---------------|
| 1     | 2 | 2   | 10 | 30 | 41                  | 96.5:3.5 | 49                   | 95.5:3.5      |
| 2     | 2 | 1   | 10 | 30 | 43                  | 96.3:3.7 | 51                   | 95.6:4.3      |
| 3     | 2 | 1   | 10 | 20 | 45                  | 96.6:3.4 | 54                   | 95:5          |
| 4     | 2 | 0.2 | 10 | 20 | 34                  | 98.4:1.6 | 47                   | 81:19         |
| 5     | 2 | 1   | 10 | 10 | 40                  | 97.5:2.5 | 51                   | 92:8          |
| 6     | 2 | 1   | 5  | 10 | 36                  | 95:5     | 51                   | 96:4          |
| 7     | 1 | 1   | 5  | 10 | 42                  | 97.2:2.8 | 50                   | 96:4          |

**Table S5. Loading studies.**

Reaction conditions: **1a** (0.1 mmol), **2a**, Pd(OAc)<sub>2</sub>, Boc-Ile-OH, Cu(OAc)<sub>2</sub>·H<sub>2</sub>O, Cs<sub>2</sub>CO<sub>3</sub> (1.5 equiv), *t*-AmOH (1.0 mL), air, 45 °C, 24 h. Isolated yields. Enantiomeric ratios (er) were determined by chiral HPLC analysis of the isolated pure product. **Entry 7** Optimized conditions.

## 4.2. Reaction scope

### General procedure (GP) for the kinetic resolution of biaryl alcohols through Pd(II)-catalyzed C-H alkenylation

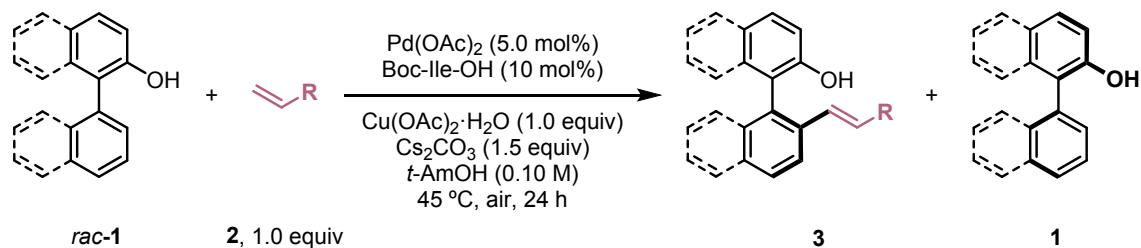

The corresponding biaryl alcohol *rac-1* (0.10 mmol, 1.0 equiv), Pd(OAc)<sub>2</sub> (1.1 mg, 5.0 mol%), Boc-Ile-OH (2.3 mg, 10 mol%), Cu(OAc)<sub>2</sub>·H<sub>2</sub>O (20 mg, 1.0 equiv) and Cs<sub>2</sub>CO<sub>3</sub> (49 mg, 1.5 equiv) were weighed and added into a Schlenk flask under air. Then, *t*-AmOH (1.0 mL, 0.10 M) and the corresponding alkene (0.10 mmol, 1.0 equiv) were added. The flask was sealed with a rubber septum and the mixture was stirred under air at 45 °C for 24 h. After cooling to rt, the reaction mixture was diluted with AcOEt and filtered through a Celite pad, washing the flask and the pad with more AcOEt (x3). The filtrate was concentrated under reduced pressure (50 °C) and the resulting residue was purified by flash column chromatography (AcOEt/hexane) to afford **1** and **3**.



### Methyl (*S,E*)-3-(2'-hydroxy-[1,1'-binaphthalen]-2-yl)acrylate (**3aa**)

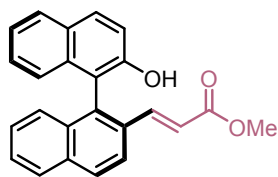

**3aa**

**3aa** was obtained by following the GP after column chromatography (AcOEt/hexane 15:85 to 25:75) as a white solid (50%, 96:4 er). **R<sub>f</sub>**: 0.35 (AcOEt/hexane 25:75, brown in *p*-anisaldehyde). **<sup>1</sup>H NMR** (500 MHz, CDCl<sub>3</sub>) δ: 8.01 (d, *J* = 8.8 Hz, 1H), 7.96 – 7.88 (m, 4H), 7.52 (ddd, *J* = 8.1, 6.6, 1.4 Hz, 1H), 7.41 (d, *J* = 16.1 Hz, 1H), 7.35 – 7.32 (m, 2H), 7.31 – 7.28 (m, 1H), 7.27 – 7.25 (m, 1H), 7.22 (ddd, *J* = 8.3, 6.8, 1.5 Hz, 1H), 6.90 (d, *J* = 8.4 Hz, 1H), 6.48 (d, *J* = 16.0 Hz, 1H), 4.99 (s, 1H), 3.59 (s, 3H). **<sup>13</sup>C NMR** (126 MHz, CDCl<sub>3</sub>) δ: 167.2 (CO), 151.4 (COH), 142.3 (CH), 134.7 (C), 134.0 (C), 133.4 (C), 133.3 (C), 133.0 (C), 130.8 (CH), 129.7 (CH), 129.1 (C), 128.4 (CH), 128.3 (CH), 127.7 (CH), 127.6 (CH), 127.1 (CH), 126.9 (CH), 124.8 (CH), 123.7 (CH), 123.4 (CH), 120.1 (CH), 117.8 (CH), 115.7 (C), 51.7 (OCH<sub>3</sub>). **HRMS** (APCI+) *m/z* calcd. for C<sub>24</sub>H<sub>19</sub>O<sub>3</sub> [M+H]: 355.1329; found: 355.1342.

Absolute configuration of compound **3aa** was determined by X-ray crystallography. The structure was deposited in the Cambridge Structural Database: 2286789.

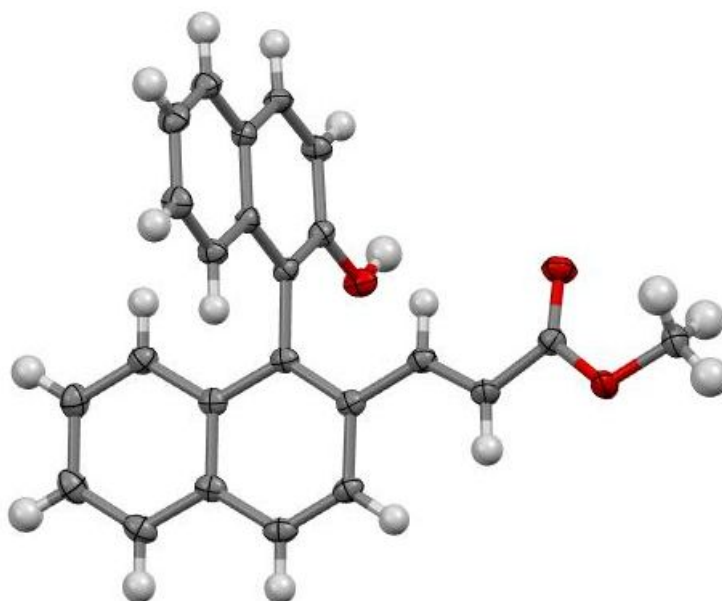

Enantioselectivity of the product was determined by chiral HPLC analysis (Chiralpak IA3, IPA/hexane 15:85, 0.5 mL/min,  $\lambda=254$  nm).

*Racemic sample*

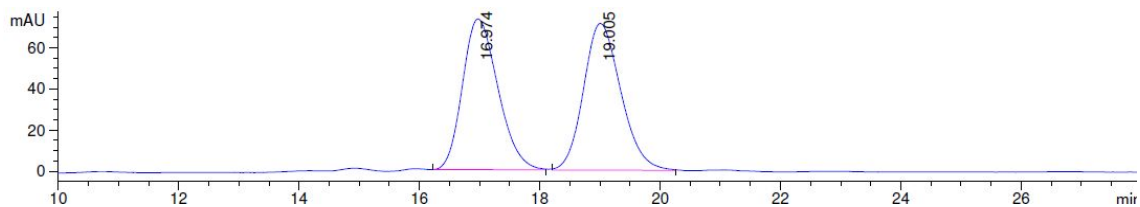

| Peak # | RetTime [min] | Type | Width [min] | Area [mAU*s] | Height [mAU] | Area %  |
|--------|---------------|------|-------------|--------------|--------------|---------|
| 1      | 16.975        | PB   | 0.6474      | 6837.99463   | 164.36688    | 49.6864 |
| 2      | 19.007        | BB   | 0.6687      | 6924.32227   | 158.79199    | 50.3136 |

*Chiral sample*

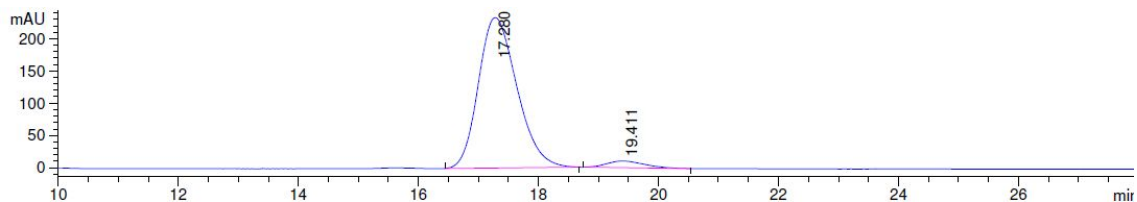

| Peak # | RetTime [min] | Type | Width [min] | Area [mAU*s] | Height [mAU] | Area %  |
|--------|---------------|------|-------------|--------------|--------------|---------|
| 1      | 17.280        | BP   | 0.6822      | 1.04065e4    | 233.36993    | 95.9219 |
| 2      | 19.411        | PB   | 0.5178      | 442.43039    | 10.24627     | 4.0781  |

Enantioselectivity of the remaining starting material (42%, 97:3 er) was determined by chiral HPLC analysis (Chiralpak IA3, IPA/hexane 20:80, 1.0 mL/min,  $\lambda=220$  nm).

*Racemic sample*

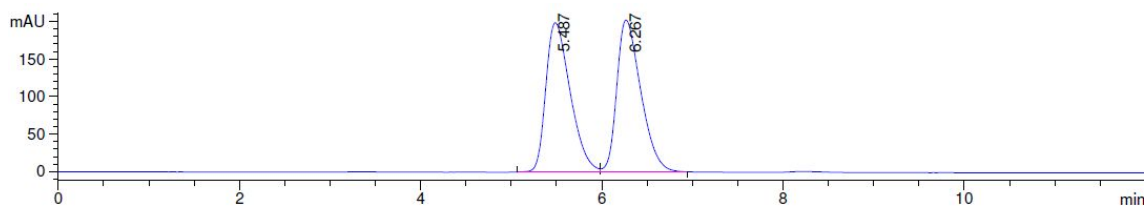

| Peak # | RetTime [min] | Type | Width [min] | Area [mAU*s] | Height [mAU] | Area %  |
|--------|---------------|------|-------------|--------------|--------------|---------|
| 1      | 5.487         | BV   | 0.2903      | 3729.95630   | 199.31519    | 49.9451 |
| 2      | 6.267         | VB   | 0.2811      | 3738.15479   | 202.79050    | 50.0549 |

*Chiral sample*

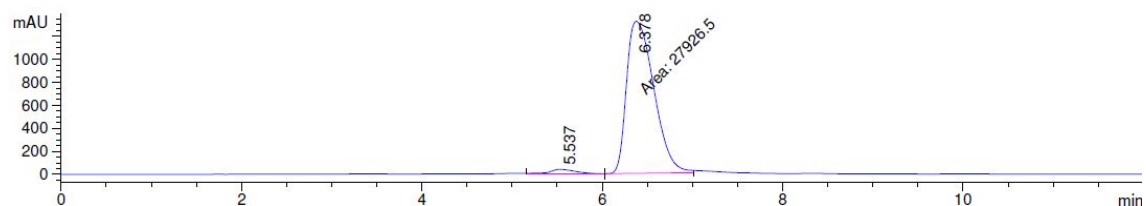

| Peak # | RetTime [min] | Type | Width [min] | Area [mAU*s] | Height [mAU] | Area %  |
|--------|---------------|------|-------------|--------------|--------------|---------|
| 1      | 5.537         | VV   | 0.2998      | 810.58215    | 40.44770     | 2.8207  |
| 2      | 6.378         | MM   | 0.3516      | 2.79265e4    | 1323.91187   | 97.1793 |

### tert-Butyl (S,E)-3-(2'-hydroxy-[1,1'-binaphthalen]-2-yl)acrylate (**3ab**)

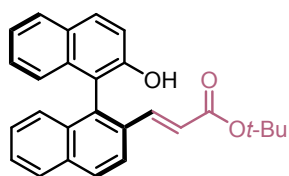

**3ab**

**3ab** was obtained by following the GP after column chromatography (AcOEt/hexane 10:90) as white solid (48%, 95.5:4.5 er). **Rf**: 0.58 (AcOEt/hexane 25:75, brown in *p*-anisaldehyde). **<sup>1</sup>H NMR** (500 MHz, CDCl<sub>3</sub>) δ: 8.02 (d, *J* = 8.8 Hz, 1H), 7.97 – 7.91 (m, 3H), 7.87 (d, *J* = 8.2 Hz, 1H), 7.52 (td, *J* = 7.4, 1.3 Hz, 1H), 7.36 – 7.26 (m, 5H), 7.21 (td, *J* = 7.6, 1.4 Hz, 1H), 6.90 (d, *J* = 8.5 Hz, 1H), 6.45 (d, *J* = 15.9 Hz, 1H), 4.69 (s, 1H), 1.37 (s, 9H). **<sup>13</sup>C NMR** (75 MHz, CDCl<sub>3</sub>) δ: 165.9 (CO), 151.3 (COH), 141.0 (CH), 134.6 (C), 133.9 (C), 133.3 (C), 133.3 (C), 132.8 (C), 130.8 (CH), 129.8 (CH), 129.2 (C), 128.4 (CH), 128.3 (CH), 127.6 (CH), 127.6 (CH), 127.1 (CH), 126.9 (CH), 124.9 (CH), 123.7 (CH), 123.4 (CH), 122.4 (CH), 117.6 (CH), 115.9 (C), 86.5 (C), 28.2 (3CH<sub>3</sub>). **HRMS** (APCI+) *m/z* calcd. for C<sub>27</sub>H<sub>24</sub>O<sub>3</sub> [M+H]: 397.1725; found: 397.1729.

Enantioselectivity of the product was determined by chiral HPLC analysis (Chiralpak IF3, IPA/hexane 15:85, flow rate = 0.5 mL/min, λ=300 nm).

#### Racemic sample

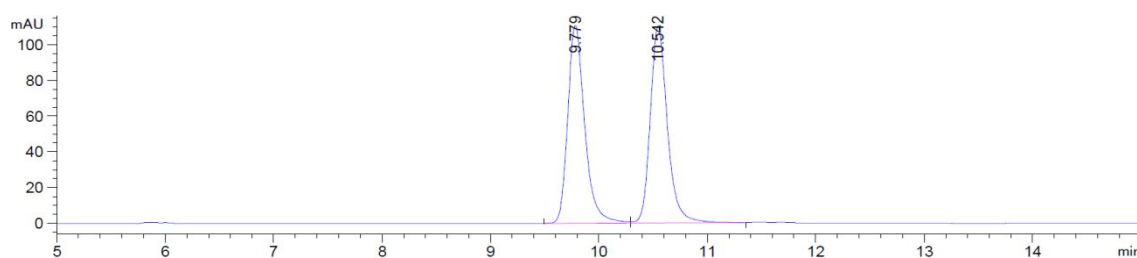

| Peak # | RetTime [min] | Type | Width [min] | Area [mAU*s] | Height [mAU] | Area %  |
|--------|---------------|------|-------------|--------------|--------------|---------|
| 1      | 9.779         | BV   | 0.1649      | 1204.34753   | 110.74083    | 49.8272 |
| 2      | 10.542        | VB   | 0.1680      | 1212.70129   | 110.52292    | 50.1728 |

#### Chiral sample

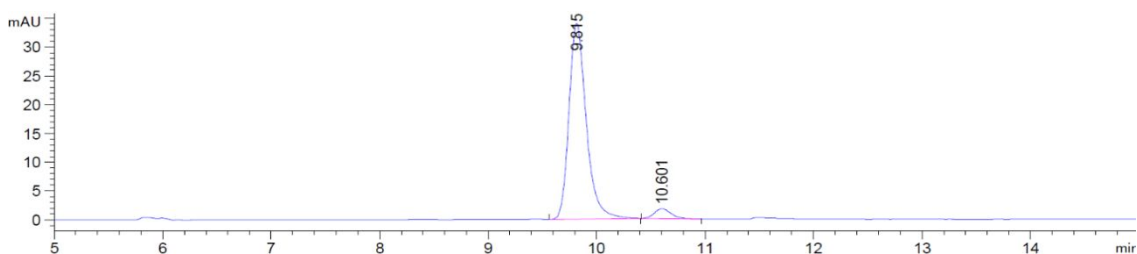

| Peak # | RetTime [min] | Type | Width [min] | Area [mAU*s] | Height [mAU] | Area %  |
|--------|---------------|------|-------------|--------------|--------------|---------|
| 1      | 9.815         | BB   | 0.1690      | 376.51291    | 34.04079     | 95.3583 |
| 2      | 10.601        | BB   | 0.1616      | 18.32714     | 1.73053      | 4.6417  |

Enantioselectivity of the remaining starting material (48%, 94.5:5.5 er) was determined by chiral HPLC analysis (Chiralpak IA3, IPA/hexane 20:80, 1.0 mL/min,  $\lambda=220$  nm).

*Racemic sample*

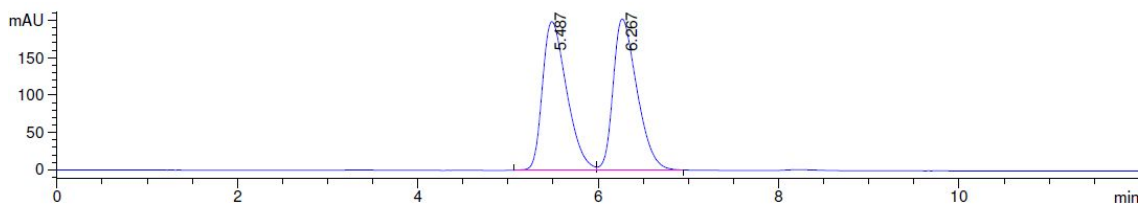

| Peak # | RetTime [min] | Type | Width [min] | Area [mAU*s] | Height [mAU] | Area %  |
|--------|---------------|------|-------------|--------------|--------------|---------|
| 1      | 5.487         | BV   | 0.2903      | 3729.95630   | 199.31519    | 49.9451 |
| 2      | 6.267         | VB   | 0.2811      | 3738.15479   | 202.79050    | 50.0549 |

*Chiral sample*

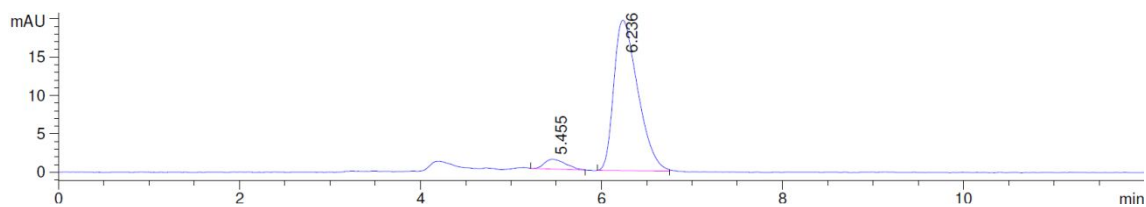

| Peak # | RetTime [min] | Type | Width [min] | Area [mAU*s] | Height [mAU] | Area %  |
|--------|---------------|------|-------------|--------------|--------------|---------|
| 1      | 5.455         | PB   | 0.2150      | 20.71888     | 1.27881      | 5.4213  |
| 2      | 6.236         | BB   | 0.2751      | 361.45444    | 19.60280     | 94.5787 |

### Diethyl (*S,E*)-(2-(2'-hydroxy-[1,1'-binaphthalen]-2-yl)vinyl)phosphonate (**3ac**)

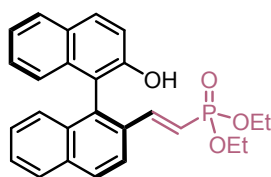

**3ac**

**3ac** was obtained by following the GP after column chromatography (AcOEt/hexane 12:88 to 100:0) as a white solid (51%, 94.5:5.5 er). **Rf**: 0.40 (MeOH/CH<sub>2</sub>Cl<sub>2</sub> 5:95, red in *p*-anisaldehyde). **<sup>1</sup>H NMR** (300 MHz, CDCl<sub>3</sub>) δ: 8.03 (d, *J* = 8.7 Hz, 1H), 7.96 – 7.84 (m, 4H), 7.57 – 7.49 (m, 1H), 7.35 – 7.28 (m, 4H), 7.20 (ddd, *J* = 8.3, 6.8, 1.4 Hz, 1H), 7.15 – 7.01 (m, 1H), 6.88 (d, *J* = 8.4 Hz, 1H), 6.29 (t, *J* = 18.1 Hz, 1H), 5.33 (s, 1H), 3.80 (p, *J* = 7.1 Hz, 3H), 3.73 – 3.59 (m, 1H), 1.09 (t, *J* = 7.1 Hz, 3H), 1.00 (t, *J* = 7.1 Hz, 3H). **<sup>13</sup>C NMR** (75 MHz, CDCl<sub>3</sub>) δ: 151.7 (COH), 145.7 (d, *J* = 6.8 Hz, CH), 134.6 (C), 134.0 (C), 133.6 (C), 133.3 (C), 133.2 (C), 132.9 (C), 130.7 (CH), 129.7 (CH), 129.1 (C), 128.4 (CH), 128.3 (CH), 127.7 (CH), 127.6 (CH), 127.1 (CH), 126.9 (CH), 124.8 (CH), 123.7 (CH), 123.2 (CH), 117.8 (CH), 117.7 (C), 115.8 (C), 115.2 (CH), 62.1 (d, *J* = 5.8 Hz, 2CH), 16.2 (t, *J* = 7.0 Hz, 2CH<sub>3</sub>). **<sup>31</sup>P NMR** (202 MHz, CDCl<sub>3</sub>) δ: 19.4. **HRMS** (APCI+) *m/z* calcd. for C<sub>26</sub>H<sub>26</sub>O<sub>4</sub>P [M+H]: 433.1563; found: 433.1557.

Enantioselectivity of the product was determined by chiral HPLC analysis (Chiralpak IE3, IPA/hexane 20:80, 0.5 mL/min, λ=254 nm).

#### Racemic sample

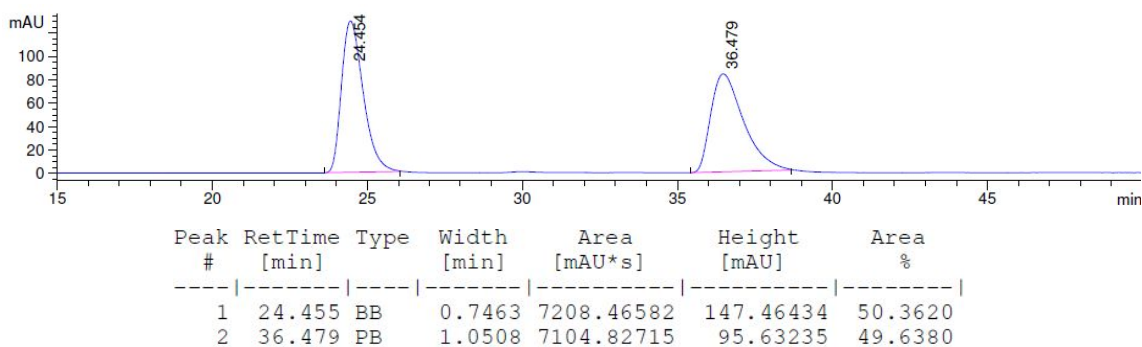

#### Chiral sample

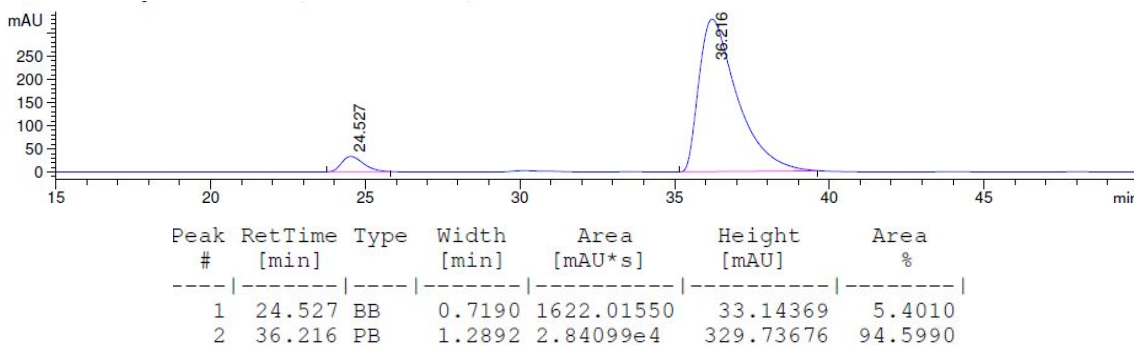

Enantioselectivity of the remaining starting material (40%, 95.5:4.5) was determined by chiral HPLC analysis (Chiralpak IA3, IPA/hexane 20:80, 1.0 mL/min,  $\lambda=220$  nm).

*Racemic sample*

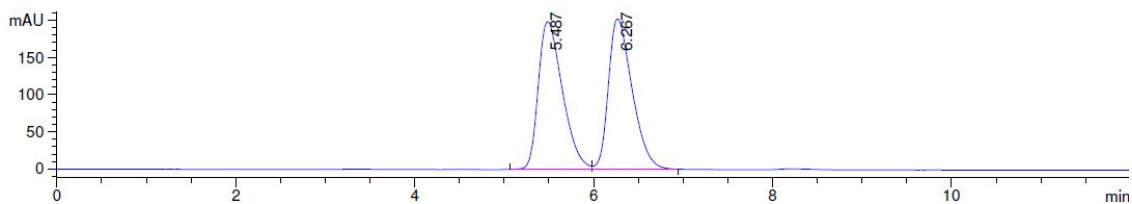

| Peak # | RetTime [min] | Type | Width [min] | Area [mAU*s] | Height [mAU] | Area %  |
|--------|---------------|------|-------------|--------------|--------------|---------|
| 1      | 5.487         | BV   | 0.2903      | 3729.95630   | 199.31519    | 49.9451 |
| 2      | 6.267         | VB   | 0.2811      | 3738.15479   | 202.79050    | 50.0549 |

*Chiral sample*

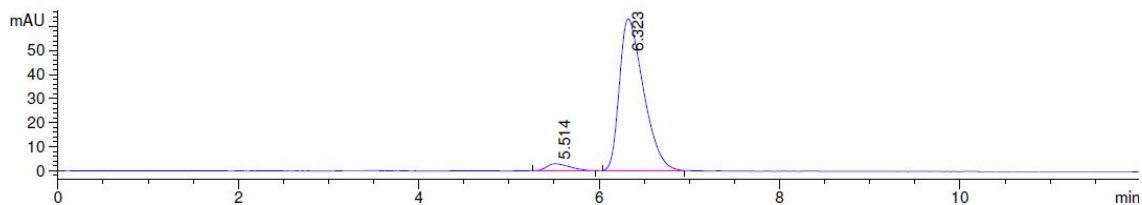

| Peak # | RetTime [min] | Type | Width [min] | Area [mAU*s] | Height [mAU] | Area %  |
|--------|---------------|------|-------------|--------------|--------------|---------|
| 1      | 5.514         | BB   | 0.2676      | 52.92949     | 2.91885      | 4.3019  |
| 2      | 6.323         | BB   | 0.2833      | 1177.44629   | 63.20213     | 95.6981 |

### (*S,E*)-3-(2'-hydroxy-[1,1'-binaphthalen]-2-yl)-*N,N*-dimethylacrylamide (**3ad**)

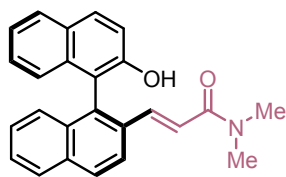

**3ad**

**3ad** was obtained by following the GP after column chromatography (AcOEt/hexane 10:90 to 100:0) as white solid (54%, 94:6 er). **Rf**: 0.54 (EtOAc, pale yellow in *p*-anisaldehyde). **<sup>1</sup>H NMR** (300 MHz, CDCl<sub>3</sub>) δ: 8.00 (d, *J* = 8.7 Hz, 1H), 7.95 – 7.85 (m, 4H), 7.50 (ddd, *J* = 8.1, 5.6, 2.4 Hz, 1H), 7.40 – 7.26 (m, 5H), 7.20 (ddd, *J* = 8.1, 6.8, 1.3 Hz, 1H), 6.91 (d, *J* = 8.4 Hz, 1H), 6.74 (d, *J* = 15.6 Hz, 1H), 5.69 (s, 1H), 2.90 (s, 3H), 2.84 (s, 3H). **<sup>13</sup>C NMR** (75 MHz, CDCl<sub>3</sub>) δ: 166.9 (CO), 151.7 (COH), 139.9 (CH), 134.3 (C), 134.1 (C), 133.8 (C), 133.5 (C), 132.9 (C), 130.5 (CH), 129.3 (CH), 128.3 (CH), 128.2 (CH), 127.3 (CH), 127.2 (CH), 127.0 (CH), 126.9 (CH), 124.8 (CH), 124.3 (CH), 123.5 (CH), 120.2 (CH), 118.1 (CH), 117.9 (C), 116.2 (C), 37.4 (CH<sub>3</sub>), 35.8 (CH<sub>3</sub>). **HRMS** (APCI+) *m/z* calcd. for C<sub>25</sub>H<sub>22</sub>NO<sub>2</sub> [M+H]: 368.1645; found: 368.1645.

Enantioselectivity of the product was determined by chiral HPLC analysis (Chiralpak IA3, IPA/hexane 15:85, flow rate = 0.5 mL/min, λ = 254 nm).

#### Racemic sample

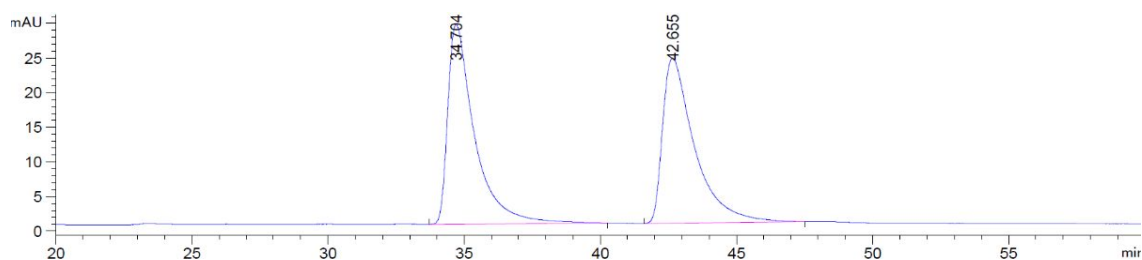

| Peak # | RetTime [min] | Type | Width [min] | Area [mAU*s] | Height [mAU] | Area %  |
|--------|---------------|------|-------------|--------------|--------------|---------|
| 1      | 34.704        | BB   | 0.9771      | 1978.82080   | 28.88938     | 50.5114 |
| 2      | 42.655        | BB   | 1.1555      | 1938.74805   | 23.82257     | 49.4886 |

#### Chiral sample

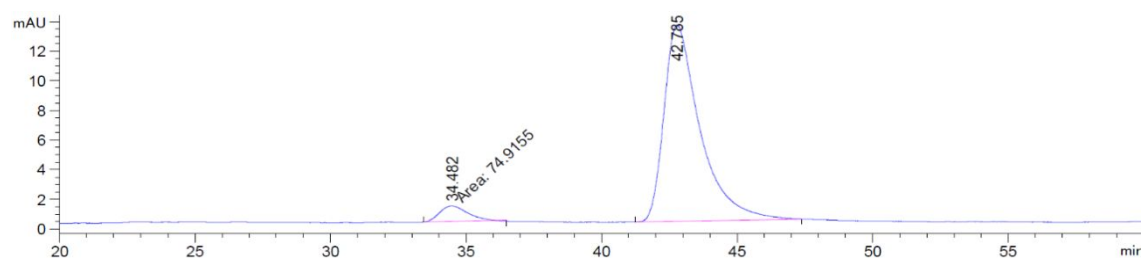

| Peak # | RetTime [min] | Type | Width [min] | Area [mAU*s] | Height [mAU] | Area %  |
|--------|---------------|------|-------------|--------------|--------------|---------|
| 1      | 34.482        | MM   | 1.1865      | 74.91554     | 1.05237      | 5.7583  |
| 2      | 42.785        | BB   | 1.2472      | 1226.08313   | 13.25453     | 94.2417 |



Enantioselectivity of the remaining starting material (45%, 96:4 er) was determined by chiral HPLC analysis (Chiralpak IA3, IPA/hexane 15:85, 0.5 mL/min,  $\lambda=220$  nm).

*Racemic Sample*

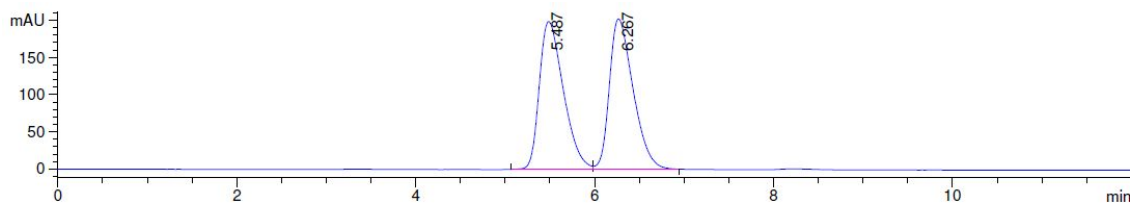

| Peak # | RetTime [min] | Type | Width [min] | Area [mAU*s] | Height [mAU] | Area %  |
|--------|---------------|------|-------------|--------------|--------------|---------|
| 1      | 5.487         | BV   | 0.2903      | 3729.95630   | 199.31519    | 49.9451 |
| 2      | 6.267         | VB   | 0.2811      | 3738.15479   | 202.79050    | 50.0549 |

*Chiral Sample*

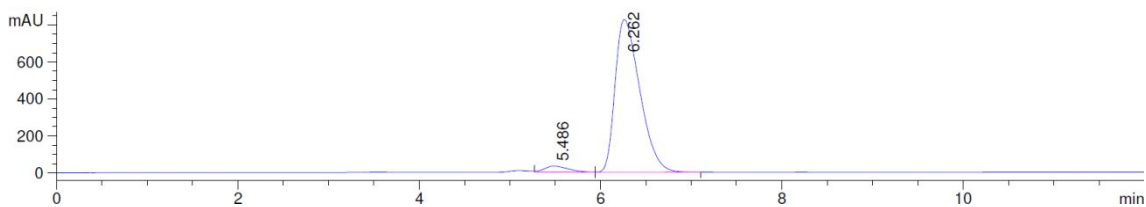

| Peak # | RetTime [min] | Type | Width [min] | Area [mAU*s] | Height [mAU] | Area %  |
|--------|---------------|------|-------------|--------------|--------------|---------|
| 1      | 5.486         | VV   | 0.2849      | 640.30023    | 33.81559     | 3.9188  |
| 2      | 6.262         | VB   | 0.2934      | 1.56987e4    | 827.20300    | 96.0812 |

### (*S,E*)-2'-styryl-[1,1'-binaphthalen]-2-ol (**3ae**)

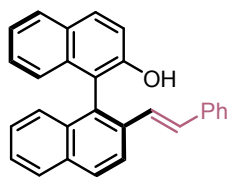

**3ae**

**3ae** was obtained by following the GP after column chromatography (AcOEt/hexane 5:95 to 7:93) as a white solid (44%, 95:5 er). **Rf**: 0.40 (AcOEt/hexane 15:85, brown in *p*-anisaldehyde). **<sup>1</sup>H NMR** (300 MHz, CDCl<sub>3</sub>) δ: 8.06 (q, *J* = 8.7 Hz, 2H), 7.98 (d, *J* = 8.9 Hz, 1H), 7.92 (t, *J* = 7.4 Hz, 2H), 7.48 (ddd, *J* = 8.1, 6.6, 1.5 Hz, 1H), 7.38 (d, *J* = 8.9 Hz, 1H), 7.35 – 7.14 (m, 10H), 7.02 (d, *J* = 8.5 Hz, 1H), 6.81 (d, *J* = 16.3 Hz, 1H), 4.82 (s, 1H). **<sup>13</sup>C NMR** (75 MHz, CDCl<sub>3</sub>) δ: 151.4 (COH), 137.3 (C), 135.8 (C), 134.0 (C), 133.6 (C), 131.2 (CH), 130.4 (CH), 129.6 (CH), 129.3 (C), 129.2 (C), 128.7 (2CH), 128.3 (CH), 128.3 (CH), 127.9 (CH), 127.4 (CH), 127.0 (CH), 126.8 (2CH), 126.6 (CH), 126.4 (CH), 126.3 (CH), 125.1 (CH), 123.7 (CH), 123.3 (CH), 117.6 (CH), 116.7 (C). **HRMS** (APCI+) *m/z* calcd. for C<sub>28</sub>H<sub>21</sub>O [M+H]: 373.1587; found: 373.1586.

Enantioselectivity of the product was determined by chiral HPLC analysis (Chiralpak IB, IPA/hexane 5:95, 0.5 mL/min, λ=254 nm).

#### Racemic sample

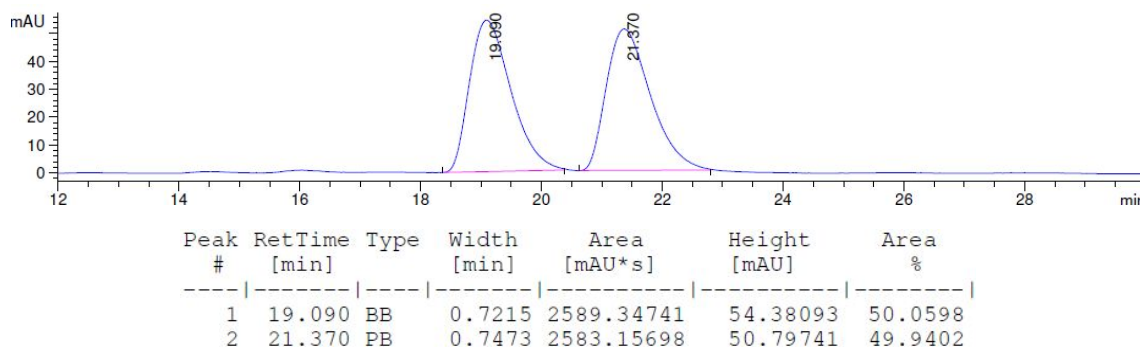

#### Chiral sample

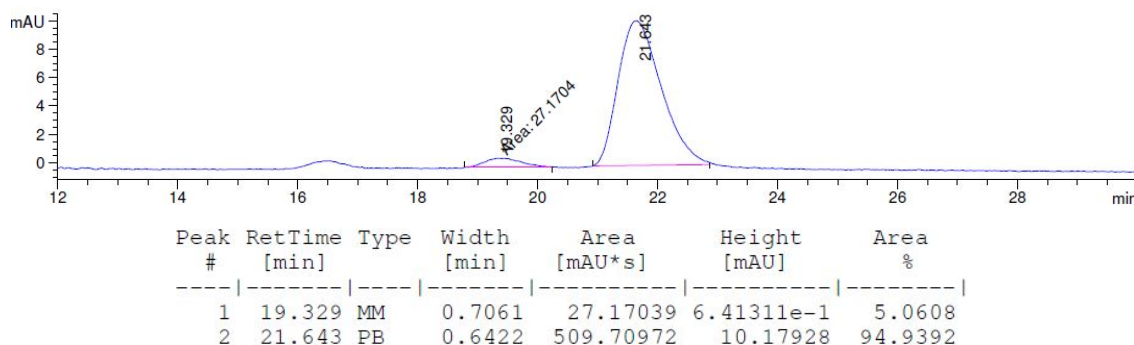

Enantioselectivity of the remaining starting material (34%, 97:3 er) was determined by chiral HPLC analysis (Chiralpak IA3, IPA/hexane 20:80, 1.0 mL/min,  $\lambda=254$  nm).

*Racemic sample*

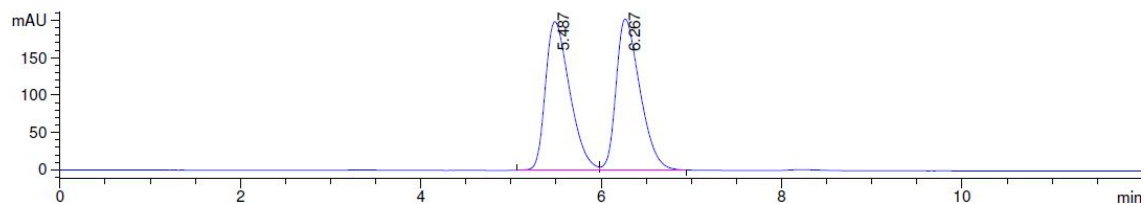

| Peak # | RetTime [min] | Type | Width [min] | Area [mAU*s] | Height [mAU] | Area %  |
|--------|---------------|------|-------------|--------------|--------------|---------|
| 1      | 5.487         | BV   | 0.2903      | 3729.95630   | 199.31519    | 49.9451 |
| 2      | 6.267         | VB   | 0.2811      | 3738.15479   | 202.79050    | 50.0549 |

*Chiral sample*

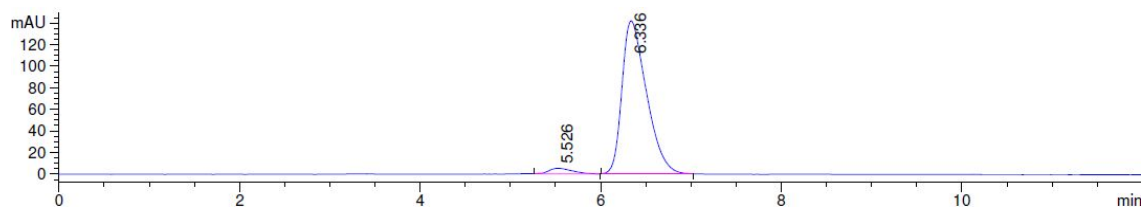

| Peak # | RetTime [min] | Type | Width [min] | Area [mAU*s] | Height [mAU] | Area %  |
|--------|---------------|------|-------------|--------------|--------------|---------|
| 1      | 5.526         | BB   | 0.2612      | 90.05308     | 5.07058      | 3.2460  |
| 2      | 6.336         | BB   | 0.2886      | 2684.20703   | 141.96140    | 96.7540 |

### (*S,E*)-2'-(4-nitrostyryl)-[1,1'-binaphthalen]-2-ol (**3af**)

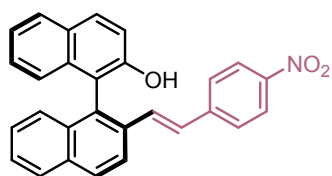

**3af**

**3af** was obtained by following the GP after column chromatography (AcOEt/hexane 8:92 to 25:75) as a bright yellow solid (37%, 96.5:3.5 er). **Rf**: 0.40 (AcOEt/hexane 25:75, cream color in *p*-anisaldehyde). **<sup>1</sup>H NMR** (300 MHz, CDCl<sub>3</sub>) δ: 8.14 – 8.00 (m, 5H), 7.96 (t, *J* = 8.4 Hz, 2H), 7.54 (t, *J* = 7.3 Hz, 1H), 7.43 – 7.22 (m, 8H), 7.06 – 6.93 (m, 2H), 4.82 (s, 1H). **<sup>13</sup>C NMR** (75 MHz, CDCl<sub>3</sub>) δ: 151.5 (COH), 147.0 (C), 143.7 (C), 134.7 (C), 134.1 (C), 133.9 (C), 133.5 (C), 130.9 (CH), 130.7 (CH), 129.9 (CH), 129.2 (C), 128.6 (CH), 128.4 (CH), 128.4 (CH), 127.7 (CH), 127.3 (CH), 127.2 (CH), 127.2 (2CH), 126.6 (CH), 125.0 (CH), 124.1 (2CH), 123.9 (CH), 123.0 (CH), 117.6 (CH), 116.2 (C). **HRMS** (APCI+) *m/z* calcd. for C<sub>28</sub>H<sub>20</sub>NO<sub>3</sub> [M+H]: 418.1438; found: 418.1439.

Enantioselectivity of the product was determined by chiral HPLC analysis (Chiralpak IA3, IPA/hexane 20:80, 1.0 mL/min, λ=220 nm).

#### Racemic sample

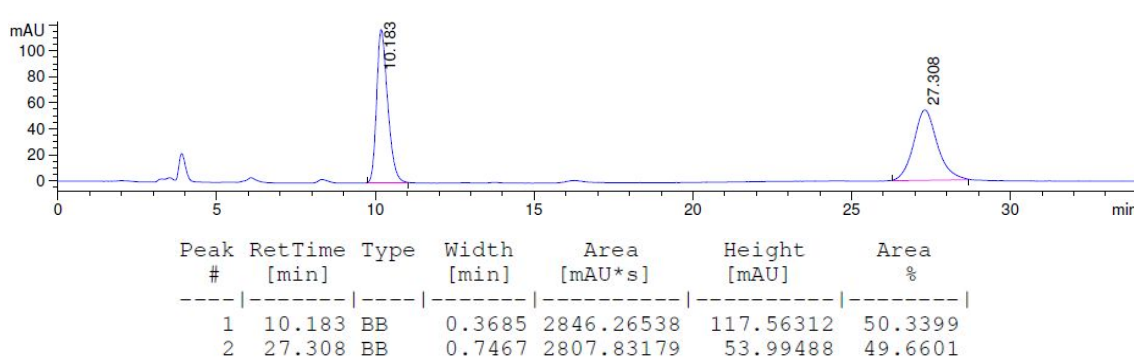

#### Chiral sample

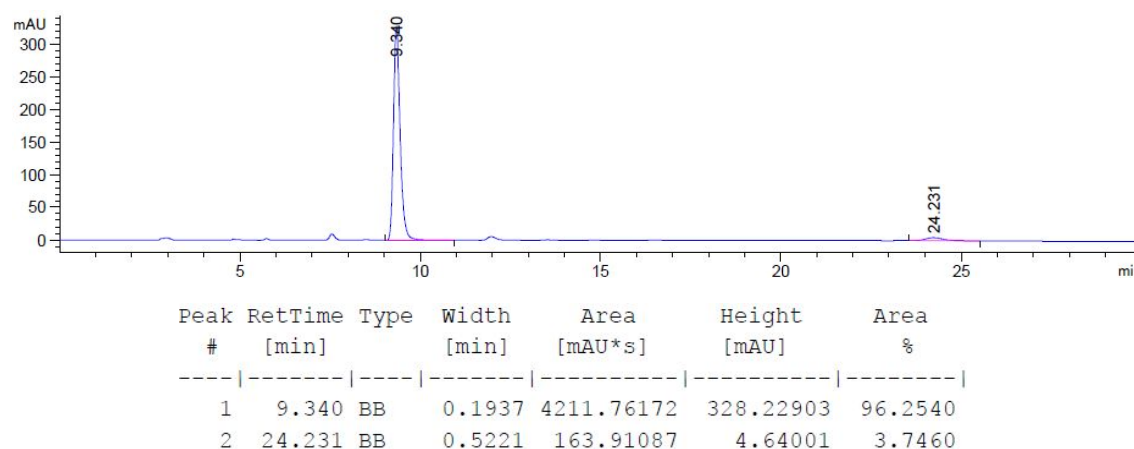

Enantioselectivity of the remaining starting material (47%, 85.5:14.5 er) was determined by chiral HPLC analysis (Chiralpak IA3, IPA/hexane 20:80, 1.0 mL/min,  $\lambda=254$  nm).

*Racemic sample*

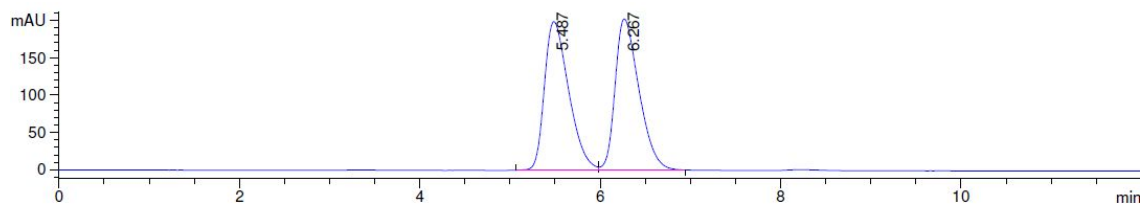

| Peak # | RetTime [min] | Type | Width [min] | Area [mAU*s] | Height [mAU] | Area %  |
|--------|---------------|------|-------------|--------------|--------------|---------|
| 1      | 5.487         | BV   | 0.2903      | 3729.95630   | 199.31519    | 49.9451 |
| 2      | 6.267         | VB   | 0.2811      | 3738.15479   | 202.79050    | 50.0549 |

*Chiral sample*

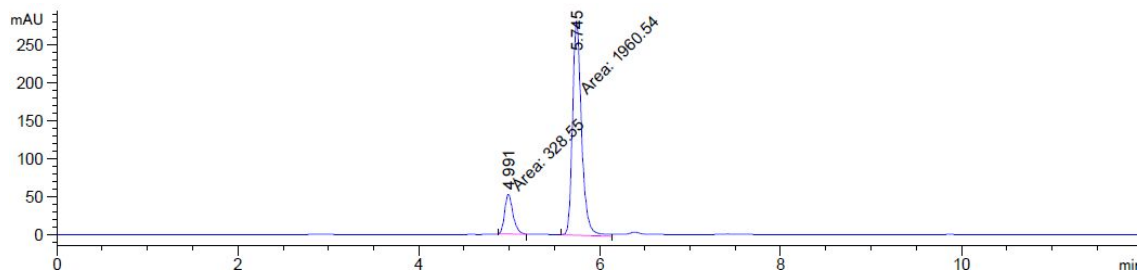

| Peak # | RetTime [min] | Type | Width [min] | Area [mAU*s] | Height [mAU] | Area %  |
|--------|---------------|------|-------------|--------------|--------------|---------|
| 1      | 4.991         | MM T | 0.1056      | 328.54990    | 51.87346     | 14.3529 |
| 2      | 5.745         | MM T | 0.1157      | 1960.54163   | 282.29678    | 85.6471 |

### (*S,E*)-2'-(4-(trifluoromethyl)styryl)-[1,1'-binaphthalen]-2-ol (**3ag**)

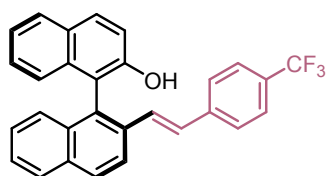

**3ag**

**3ag** was obtained by following the GP after column chromatography (Et<sub>2</sub>O/hexane 10:90 to 15:85) as a white solid (38%, 95:5 er). **Rf**: 0.40 (Et<sub>2</sub>O/hexane 40:60, light brown in *p*-anisaldehyde). **<sup>1</sup>H NMR** (300 MHz, CDCl<sub>3</sub>) δ: 8.10 – 8.02 (m, 2H), 7.98 (d, *J* = 8.9 Hz, 1H), 7.93 (t, *J* = 8.3 Hz, 2H), 7.50 (ddd, *J* = 8.1, 6.6, 1.5 Hz, 1H), 7.47 – 7.29 (m, 5H), 7.27 – 7.19 (m, 5H), 7.00 (d, *J* = 8.3 Hz, 1H), 6.88 (d, *J* = 16.3 Hz, 1H), 4.79 (s, 1H). **<sup>13</sup>C NMR** (75 MHz, CDCl<sub>3</sub>) δ: 151.4 (COH), 140.7 (C), 135.1 (C), 133.9 (C), 133.9 (C), 133.5 (C), 130.6 (CH), 130.1 (C), 129.8 (CH), 129.5 (CH), 129.2 (C), 128.8 (CH), 128.4 (CH), 128.3 (CH), 127.5 (CH), 127.1 (CH), 127.0 (CH) 126.9 (2CH), 126.5 (CH), 125.6 (q, *J* = 4.0 Hz, CH), 125.0 (CH), 123.8 (CH), 123.1 (CH), 117.6 (CH), 116.4 (C). **<sup>19</sup>F NMR** (282 MHz, CDCl<sub>3</sub>) δ: -62.6. **HRMS** (APCI+) *m/z* calcd. for C<sub>29</sub>H<sub>20</sub>FO<sub>3</sub> [M+H]: 441.1461; found: 441.1456.

Enantioselectivity of the product was determined by chiral HPLC analysis (Chiralpak IA3, IPA/hexane 20:80, 1.0 mL/min, λ=254 nm).

#### Racemic sample

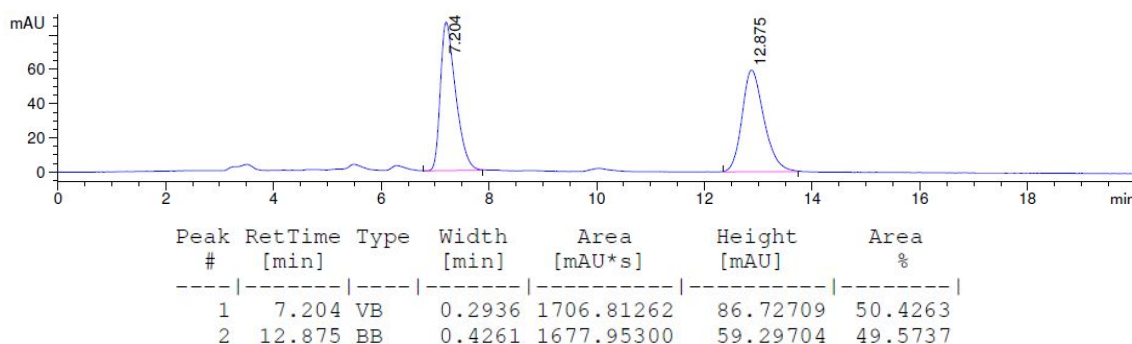

#### Chiral sample

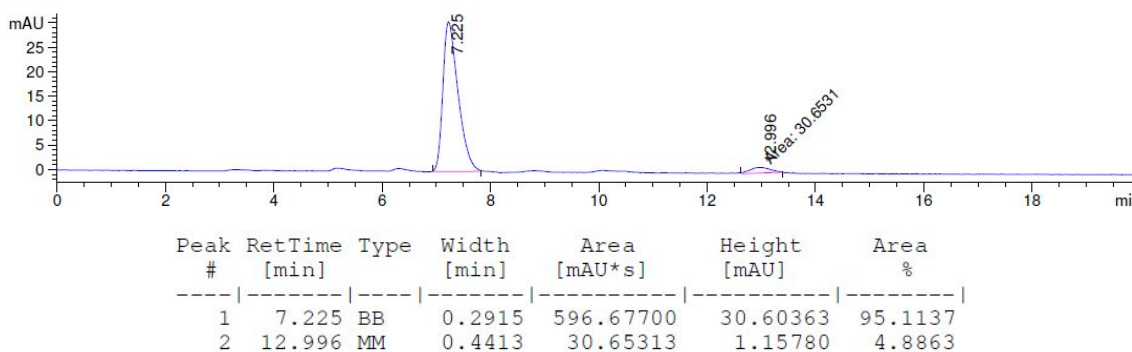

Enantioselectivity of the remaining starting material (46%, 90.5:9.5 er) was determined by chiral HPLC analysis (Chiralpak IA3, IPA/hexane 20:80, 1.0 mL/min,  $\lambda=254$  nm).

*Racemic sample*

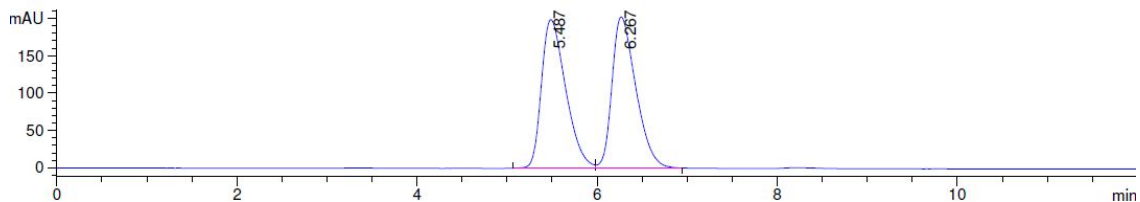

| Peak # | RetTime [min] | Type | Width [min] | Area [mAU*s] | Height [mAU] | Area %  |
|--------|---------------|------|-------------|--------------|--------------|---------|
| 1      | 5.487         | BV   | 0.2903      | 3729.95630   | 199.31519    | 49.9451 |
| 2      | 6.267         | VB   | 0.2811      | 3738.15479   | 202.79050    | 50.0549 |

*Chiral sample*

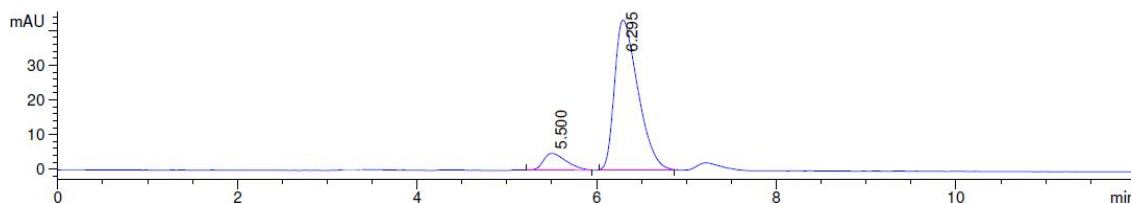

| Peak # | RetTime [min] | Type | Width [min] | Area [mAU*s] | Height [mAU] | Area %  |
|--------|---------------|------|-------------|--------------|--------------|---------|
| 1      | 5.500         | BP   | 0.2525      | 83.27390     | 4.79886      | 9.5725  |
| 2      | 6.295         | BB   | 0.2797      | 786.65222    | 43.35854     | 90.4275 |

### Ethyl (*R,E*)-7-(2'-hydroxy-[1,1'-binaphthalen]-2-yl)hept-6-enoate (**3ah**)

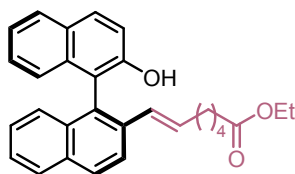

**3ah**

**3ah** was obtained by following the GP after column chromatography (AcOEt/hexane 5:95 to 15:85) as a light-yellow oil (29%, 95:5 er). **Rf**: 0.50 (AcOEt/hexane 25:75, reddish-brown in *p*-anisaldehyde). **<sup>1</sup>H NMR** (300 MHz, CDCl<sub>3</sub>) δ: 8.02 – 7.86 (m, 5H), 7.46 (t, *J* = 6.6, 1H), 7.38 – 7.19 (m, 5H), 7.00 (d, *J* = 8.6 Hz, 1H), 6.31 (dt, *J* = 15.7, 7.0 Hz, 1H), 6.10 (d, *J* = 15.9 Hz, 1H), 5.04 (s, 1H), 4.13 (q, *J* = 7.1 Hz, 2H), 2.20 (t, *J* = 7.7 Hz, 2H), 2.03 (q, *J* = 7.0 Hz, 2H), 1.59 – 1.48 (m, 2H), 1.36 (p, *J* = 7.4 Hz, 2H), 1.25 (t, *J* = 6.5 Hz, 3H). **<sup>13</sup>C NMR** (75 MHz, CDCl<sub>3</sub>) δ: 173.9 (CO), 151.4 (COH), 136.2 (C), 133.9 (C), 133.5 (C), 133.3 (CH), 133.3 (C), 130.1 (CH), 129.3 (CH), 128.2 (2CH), 128.1 (CH), 127.1 (CH), 126.8 (CH), 126.2 (CH), 126.1 (CH), 125.2 (CH), 123.6 (CH), 123.5 (CH), 117.6 (CH), 117.1 (C), 60.4 (OCH<sub>2</sub>), 34.2 (CH<sub>2</sub>), 32.8 (CH<sub>2</sub>), 28.7 (CH<sub>2</sub>), 24.3 (CH<sub>2</sub>), 14.4 (CH<sub>3</sub>). **HRMS** (APCI+) *m/z* calcd. for C<sub>29</sub>H<sub>29</sub>O<sub>3</sub> [M+H]: 425.2111; found: 425.2236.

Enantioselectivity of the product was determined by chiral HPLC analysis (Chiralpak IA3, IPA/hexane 20:80, flow rate = 1.0 mL/min, λ = 254 nm).

#### Racemic sample

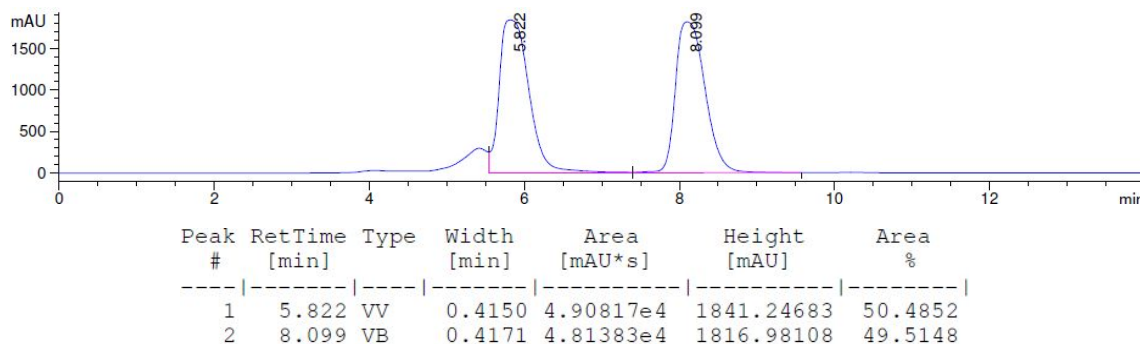

#### Chiral sample

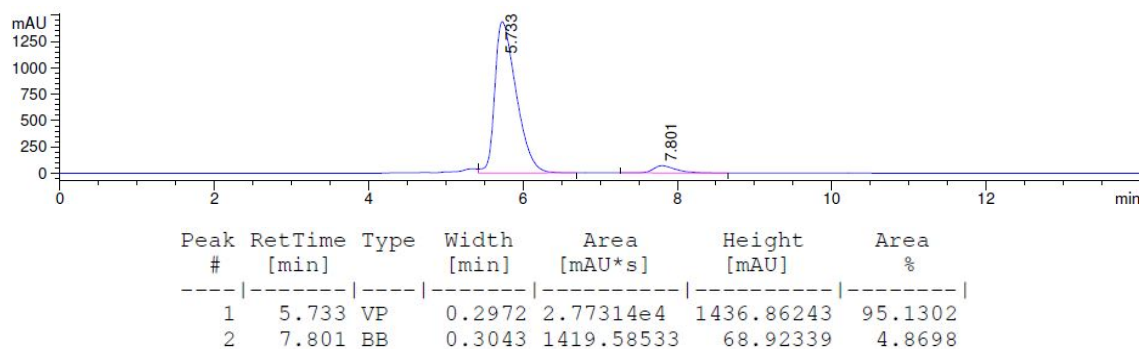



Enantioselectivity of the remaining starting material (40%, 96.5:3.5 er) was determined by chiral HPLC analysis (Chiralpak IA3, IPA/hexane 20:80, 1.0 mL/min,  $\lambda=254$  nm).

*Racemic sample*

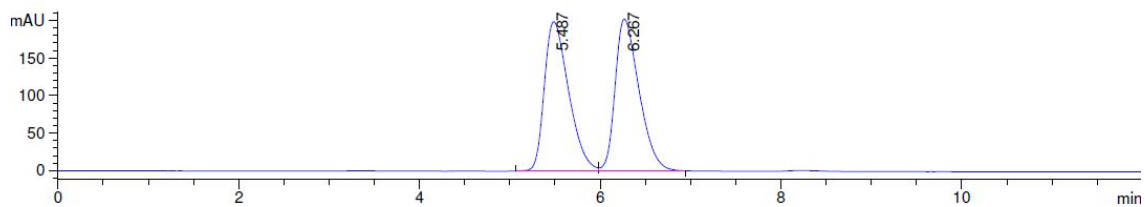

| Peak # | RetTime [min] | Type | Width [min] | Area [mAU*s] | Height [mAU] | Area %  |
|--------|---------------|------|-------------|--------------|--------------|---------|
| 1      | 5.487         | BV   | 0.2903      | 3729.95630   | 199.31519    | 49.9451 |
| 2      | 6.267         | VB   | 0.2811      | 3738.15479   | 202.79050    | 50.0549 |

*Chiral sample*

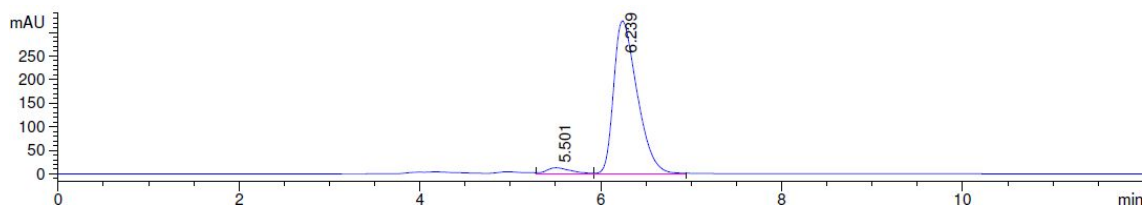

| Peak # | RetTime [min] | Type | Width [min] | Area [mAU*s] | Height [mAU] | Area %  |
|--------|---------------|------|-------------|--------------|--------------|---------|
| 1      | 5.501         | VV   | 0.2710      | 221.17145    | 12.22974     | 3.6648  |
| 2      | 6.239         | VB   | 0.2737      | 5813.89648   | 323.39731    | 96.3352 |

### (*R,E*)-2'-(oct-1-en-1-yl)-[1,1'-binaphthalen]-2-ol (**3ai**)

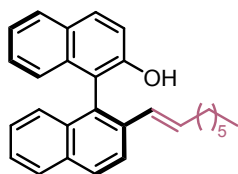

**3ai**

**3ai** was obtained by following the GP after column chromatography (AcOEt/hexane 3:97) as colorless granules (27%, 95.5:4.5 er). **R<sub>f</sub>**: 0.65 (AcOEt/hexane 15:85, clear brown in *p*-anisaldehyde). **<sup>1</sup>H NMR** (300 MHz, CDCl<sub>3</sub>) δ: 8.00 – 7.84 (m, 5H), 7.47 – 7.39 (m, 1H), 7.37 – 7.14 (m, 5H), 6.98 (d, *J* = 8.4 Hz, 1H), 6.33 (dt, *J* = 15.7, 7.0 Hz, 1H), 6.07 (d, *J* = 15.8 Hz, 1H), 4.80 (s, 1H), 1.99 (q, *J* = 7.4 Hz, 2H), 1.36 – 1.09 (m, 8H), 0.83 (t, *J* = 6.8 Hz, 3H). **<sup>13</sup>C NMR** (75 MHz, CDCl<sub>3</sub>) δ: 151.3 (COH), 136.5 (C), 134.4 (CH), 133.9 (C), 133.6 (C), 133.3 (C), 130.1 (CH), 129.4 (CH), 129.2 (C), 128.2 (CH), 128.2 (CH), 127.5 (CH), 127.1 (CH), 126.8 (CH), 126.2 (CH), 126.1 (CH), 125.2 (CH), 123.7 (CH), 123.6 (CH), 117.6 (CH), 117.1 (C), 33.3 (CH<sub>2</sub>), 31.8 (CH<sub>2</sub>), 29.3 (CH<sub>2</sub>), 28.8 (CH<sub>2</sub>), 22.7 (CH<sub>2</sub>), 14.2 (CH<sub>3</sub>). **HRMS** (APCI+) *m/z* calcd. for C<sub>28</sub>H<sub>29</sub>O [M+H]: 381.2213; found: 381.2217.

Enantioselectivity of the product was determined by chiral HPLC analysis (Chiralpak IA3, IPA/hexane 15:85, flow rate = 0.5 mL/min, λ=254 nm).

#### Racemic sample

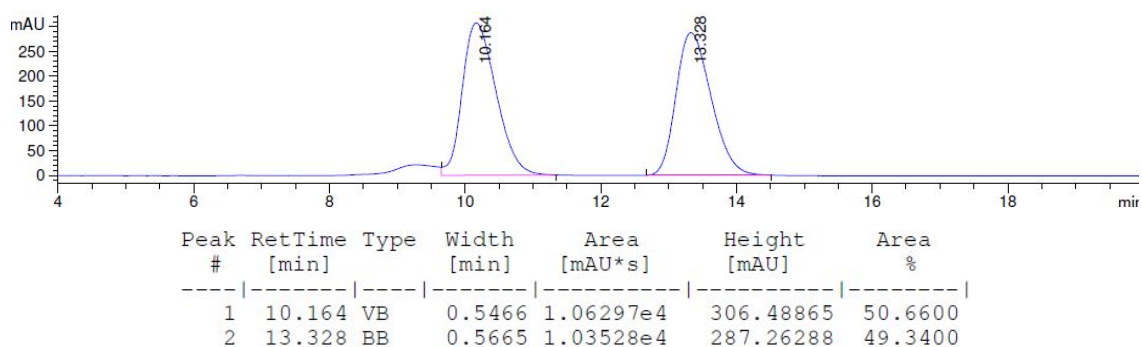

#### Chiral sample

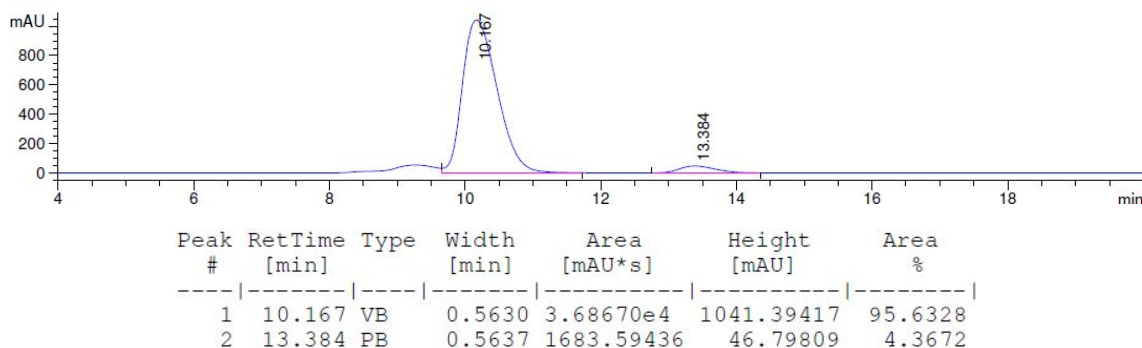

Enantioselectivity of the remaining starting material (43%, 86.5:13.5 er) was determined by chiral HPLC analysis (Chiralpak IA3, IPA/hexane 20:80, 1.0 mL/min,  $\lambda=254$  nm).

*Racemic sample*

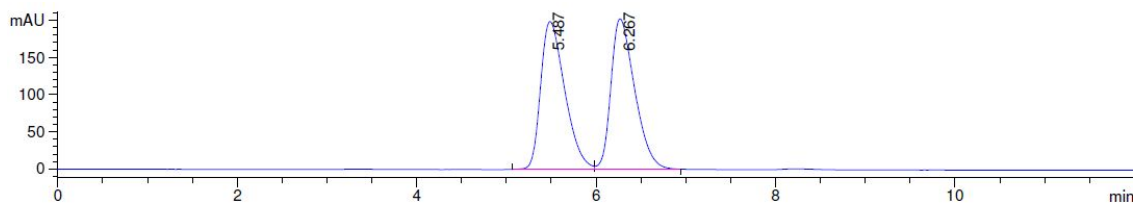

| Peak # | RetTime [min] | Type | Width [min] | Area [mAU*s] | Height [mAU] | Area %  |
|--------|---------------|------|-------------|--------------|--------------|---------|
| 1      | 5.487         | BV   | 0.2903      | 3729.95630   | 199.31519    | 49.9451 |
| 2      | 6.267         | VB   | 0.2811      | 3738.15479   | 202.79050    | 50.0549 |

*Chiral sample*

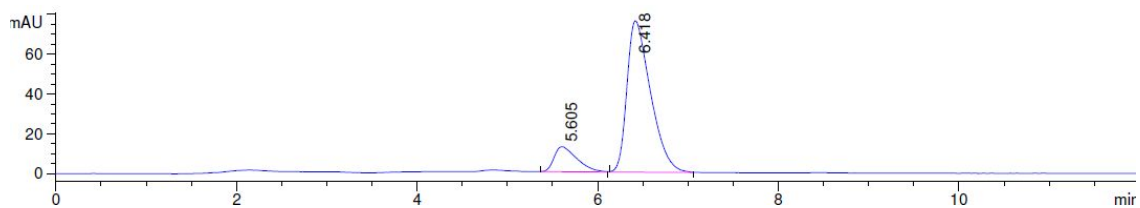

| Peak # | RetTime [min] | Type | Width [min] | Area [mAU*s] | Height [mAU] | Area %  |
|--------|---------------|------|-------------|--------------|--------------|---------|
| 1      | 5.605         | BB   | 0.2607      | 218.75723    | 12.59015     | 13.6813 |
| 2      | 6.418         | BB   | 0.2758      | 1380.19495   | 76.03776     | 86.3187 |

### Methyl (S,E)-3-(6'-chloro-2'-hydroxy-[1,1'-binaphthalen]-2-yl)acrylate (3ba)

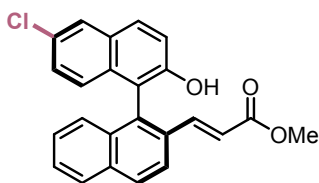

3ba

**3ba** was obtained by following the GP after column chromatography (AcOEt/hexane 15:85 to 25:75) as a white solid (51%, 95.5:4.5 er). **Rf**: 0.30 (AcOEt/hexane 25:75, brown in *p*-anisaldehyde). **<sup>1</sup>H NMR** (300 MHz, CDCl<sub>3</sub>) δ: 8.03 (d, *J* = 8.8 Hz, 1H), 7.96 – 7.91 (m, 2H), 7.89 – 7.84 (m, 2H), 7.54 (ddd, *J* = 8.1, 6.8, 1.3 Hz, 1H), 7.38 – 7.30 (m, 3H), 7.21 (d, *J* = 8.4 Hz, 1H), 7.15 (dd, *J* = 9.0, 2.2 Hz, 1H), 6.82 (d, *J* = 8.9 Hz, 1H), 6.50 (d, *J* = 16.0 Hz, 1H), 4.82 (s, 1H), 3.63 (s, 3H). **<sup>13</sup>C NMR** (75 MHz, CDCl<sub>3</sub>) δ: 167.0 (CO), 151.6 (COH), 141.9 (CH), 134.7 (C), 133.2 (C), 133.1 (C), 132.4 (C), 132.3 (C), 130.1 (CH), 129.9 (CH), 129.8 (C), 129.6 (C), 128.5 (CH), 127.9 (CH), 127.9 (CH), 127.8 (CH), 127.1 (CH), 126.7 (CH), 126.4 (CH), 123.4 (CH), 120.5 (CH), 118.9 (CH), 116.1 (C), 51.8 (OCH<sub>3</sub>). **HRMS** (APCI+) *m/z* calcd. for C<sub>24</sub>H<sub>18</sub>ClO<sub>3</sub> [M+H]: 389.0939; found: 389.0949.

Enantioselectivity of the product was determined by chiral HPLC analysis (Chiralpak IB, IPA/hexane 15:85, 0.5 mL/min, λ=220 nm).

#### Racemic sample

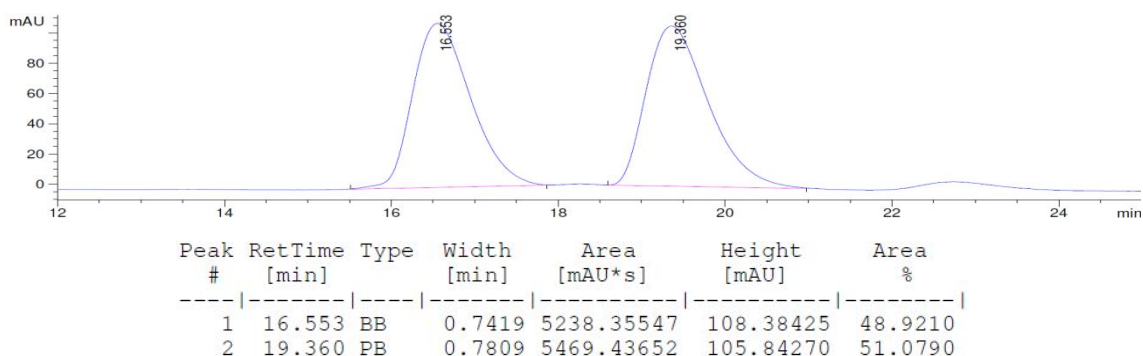

#### Chiral sample

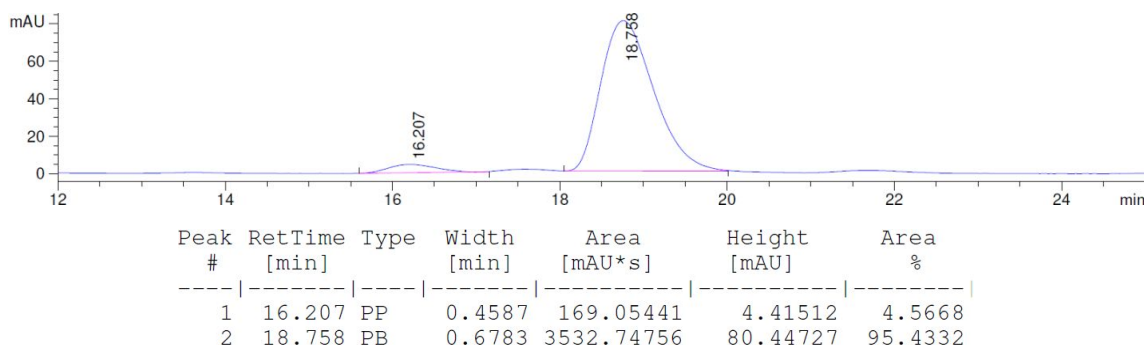

Enantioselectivity of the remaining starting material (47%, 96.5:3.5 er) was determined by chiral HPLC analysis (Chiralpak IB, IPA/hexane 10:90, 0.5 mL/min,  $\lambda=220$  nm).

*Racemic sample*

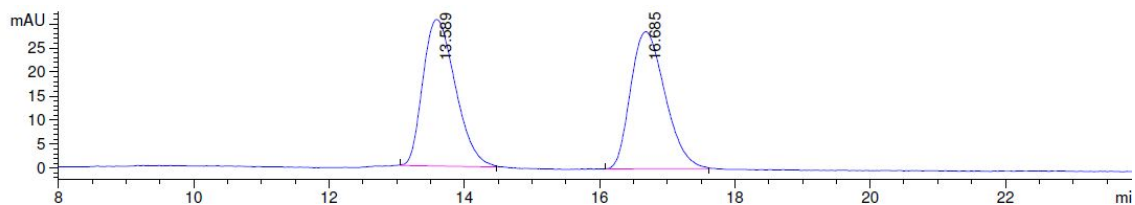

| Peak # | RetTime [min] | Type | Width [min] | Area [mAU*s] | Height [mAU] | Area %  |
|--------|---------------|------|-------------|--------------|--------------|---------|
| 1      | 13.589        | BB   | 0.4961      | 1019.74121   | 30.49773     | 50.2255 |
| 2      | 16.685        | BB   | 0.5414      | 1010.58453   | 28.52160     | 49.7745 |

*Chiral sample*

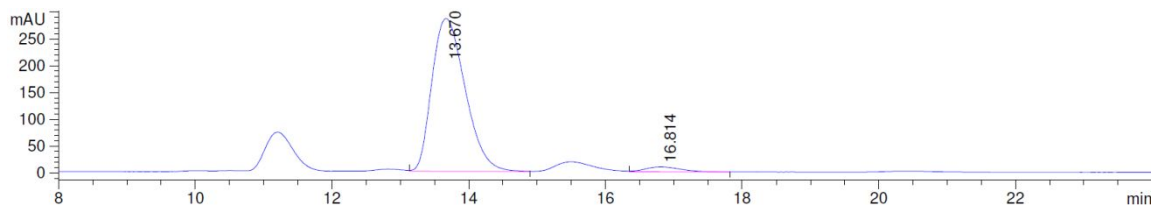

| Peak # | RetTime [min] | Type | Width [min] | Area [mAU*s] | Height [mAU] | Area %  |
|--------|---------------|------|-------------|--------------|--------------|---------|
| 1      | 13.670        | VB   | 0.5321      | 9627.31738   | 285.00226    | 96.7208 |
| 2      | 16.814        | VB   | 0.4499      | 326.40692    | 9.02506      | 3.2792  |

### Methyl (*S,E*)-3-(6'-acetyl-2'-hydroxy-[1,1'-binaphthalen]-2-yl)acrylate (**3ca**)

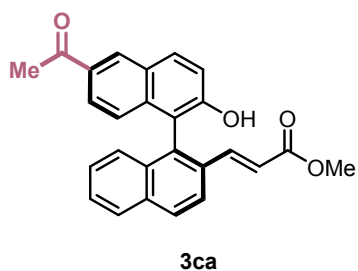

**3ca** was obtained by following the GP after column chromatography (AcOEt/hexane 20:80 to 45:75) as a white solid (41%, 95.5:4.5 er). **Rf**: 0.35 (AcOEt/hexane 45:55, red in *p*-anisaldehyde). **<sup>1</sup>H NMR** (300 MHz, DMSO-*d*<sub>6</sub>) δ: 10.17 (s, 1H), 8.68 (s, 1H), 8.22 (d, *J* = 8.8 Hz, 1H), 8.18 – 8.02 (m, 3H), 7.68 (dd, *J* = 8.7, 1.8 Hz, 1H), 7.58 – 7.48 (m, 2H), 7.32 (t, *J* = 7.7 Hz, 1H), 7.24 (d, *J* = 16.0 Hz, 1H), 7.06 (d, *J* = 8.3 Hz, 1H), 6.78 – 6.68 (m, 2H), 3.56 (s, 3H), 2.63 (s, 3H). **<sup>13</sup>C NMR** (75 MHz, DMSO-*d*<sub>6</sub>) δ: 197.2 (COMe), 166.6 (COOMe), 155.5 (COH), 142.4 (CH), 136.3 (C), 135.9 (C), 134.1 (C), 132.4 (C), 131.9 (CH), 131.4 (C), 130.9 (CH), 130.8 (C), 128.4 (CH), 128.2 (CH), 127.1 (CH), 126.9 (CH), 126.7 (C), 126.3 (CH), 124.6 (CH), 124.0 (CH), 123.3 (CH), 119.1 (CH), 118.7 (CH), 115.8 (C), 51.3 (OCH<sub>3</sub>), 26.5 (CH<sub>3</sub>). **HRMS** (APCI+) *m/z* calcd. for C<sub>26</sub>H<sub>21</sub>O<sub>4</sub> [M+H]: 397.1434; found: 397.1438.

Enantioselectivity of the product was determined by chiral HPLC analysis (Chiralpak IA3, IPA/hexane 15:85, 0.5 mL/min, λ=220 nm).

#### Racemic sample

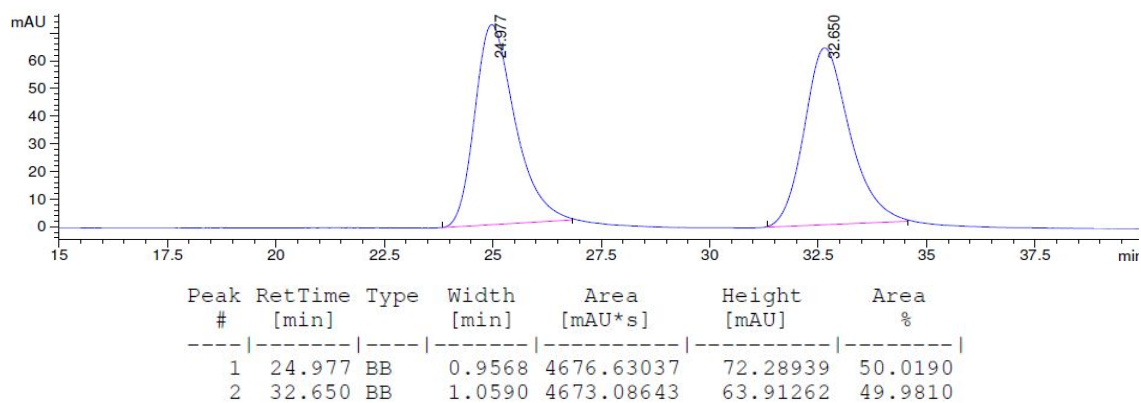

#### Chiral sample

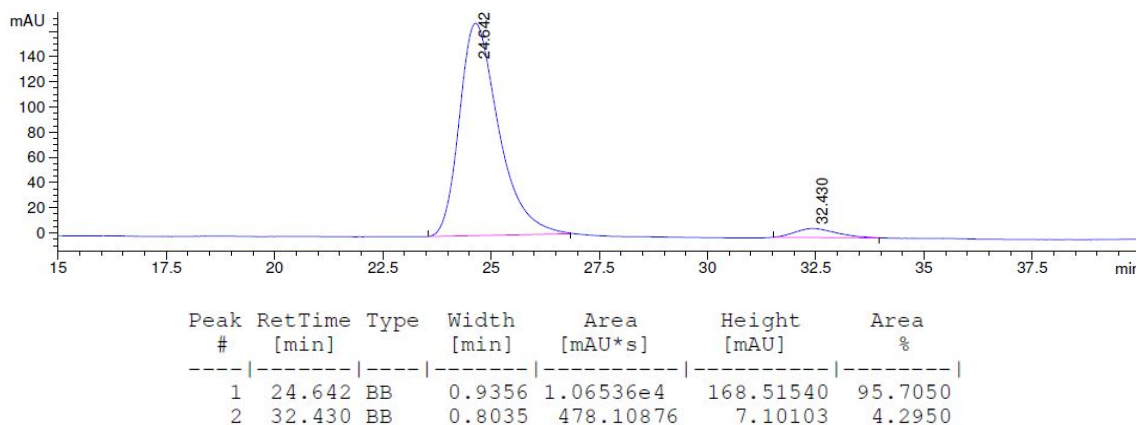

Enantioselectivity of the remaining starting material (42%, 97:3 er) was determined by chiral HPLC analysis (Chiralpak IB, IPA/hexane 15:85, 0.5 mL/min,  $\lambda=220$  nm).

*Racemic sample*

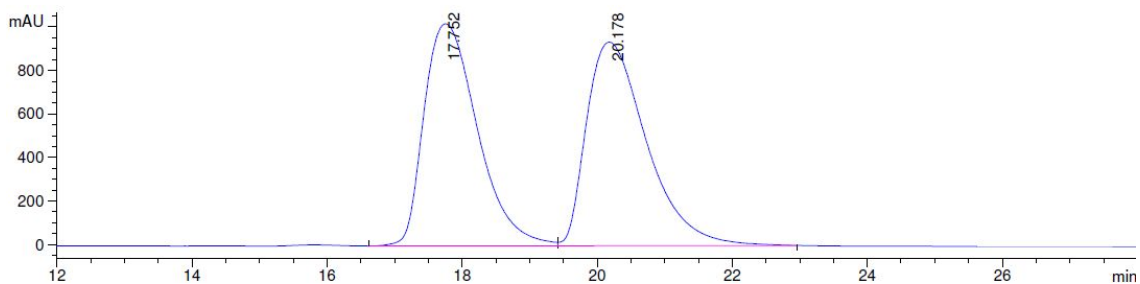

| Peak # | RetTime [min] | Type | Width [min] | Area [mAU*s] | Height [mAU] | Area %  |
|--------|---------------|------|-------------|--------------|--------------|---------|
| 1      | 17.752        | VV   | 0.8555      | 5.60477e4    | 1019.27789   | 49.2913 |
| 2      | 20.178        | VB   | 0.9335      | 5.76593e4    | 934.92120    | 50.7087 |

*Chiral sample*

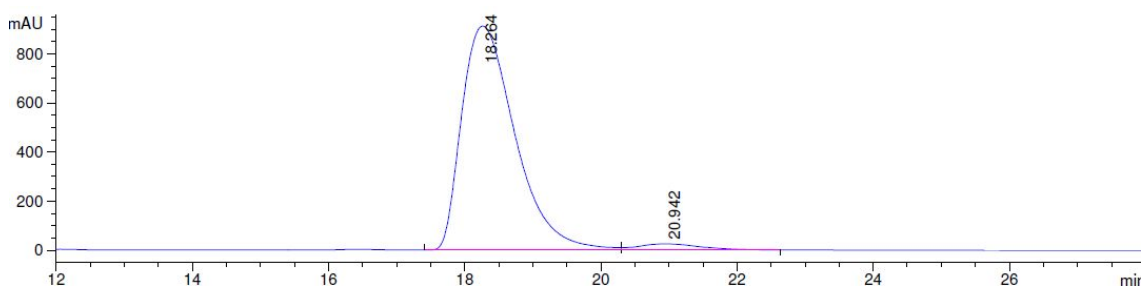

| Peak # | RetTime [min] | Type | Width [min] | Area [mAU*s] | Height [mAU] | Area %  |
|--------|---------------|------|-------------|--------------|--------------|---------|
| 1      | 18.264        | VB   | 0.8551      | 4.96928e4    | 912.80182    | 96.8721 |
| 2      | 20.942        | BB   | 0.7484      | 1604.51465   | 25.55959     | 3.1279  |



### Methyl (S,E)-3-(2'-hydroxy-6'-methoxy-[1,1'-binaphthalen]-2-yl)acrylate (3da)

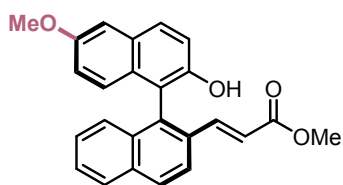

3da

3da was obtained by following the GP after column chromatography (AcOEt/hexane 20:80 to 30:70) as a white solid (55%, 97.5:2.5 er). **Rf**: 0.24 (AcOEt/hexane 25:75, grey in *p*-anisaldehyde). **<sup>1</sup>H NMR** (300 MHz, CDCl<sub>3</sub>) δ: 8.00 (d, *J* = 8.9 Hz, 1H), 7.97 – 7.88 (m, 2H), 7.84 (d, *J* = 8.9 Hz, 1H), 7.52 (ddd, *J* = 8.2, 6.5, 1.6 Hz, 1H), 7.40 (d, *J* = 16.0 Hz, 1H), 7.35 – 7.24 (m, 3H), 7.21 (d, *J* = 2.6 Hz, 1H), 6.90 (dd, *J* = 9.1, 2.6 Hz, 1H), 6.79 (d, *J* = 9.2 Hz, 1H), 6.49 (d, *J* = 16.0 Hz, 1H), 4.67 (s, 1H), 3.90 (s, 3H), 3.62 (s, 3H). **<sup>13</sup>C NMR** (75 MHz, CDCl<sub>3</sub>) δ: 167.1 (CO), 156.2 (COMe), 149.8 (COH), 142.3 (CH), 134.7 (C), 133.3 (C), 133.0 (C), 130.2 (C), 129.8 (CH), 129.5 (CH), 129.2 (C), 128.4 (CH), 127.8 (CH), 127.7 (CH), 127.0 (CH), 126.3 (CH), 123.4 (CH), 120.2 (CH), 119.5 (CH), 118.1 (CH), 116.1 (C), 106.9 (CH), 55.5 (OCH<sub>3</sub>), 51.7 (OCH<sub>3</sub>). **HRMS** (APCI+) *m/z* calcd. for C<sub>25</sub>H<sub>21</sub>O<sub>4</sub> [M+H]: 385.1434; found: 385.1437.

Enantioselectivity of the product was determined by chiral HPLC analysis (Chiralpak IB, IPA/hexane 15:85, 0.5 mL/min, λ=254 nm).

#### Racemic sample

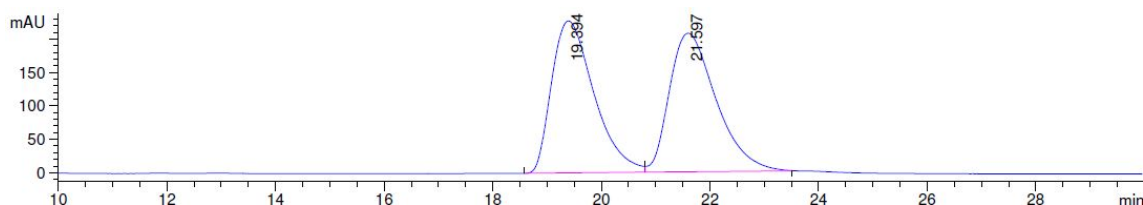

| Peak # | RetTime [min] | Type | Width [min] | Area [mAU*s] | Height [mAU] | Area %  |
|--------|---------------|------|-------------|--------------|--------------|---------|
| 1      | 19.394        | BV   | 0.8266      | 1.23270e4    | 227.34145    | 49.8540 |
| 2      | 21.597        | VB   | 0.9078      | 1.23993e4    | 207.30821    | 50.1460 |

#### Chiral sample

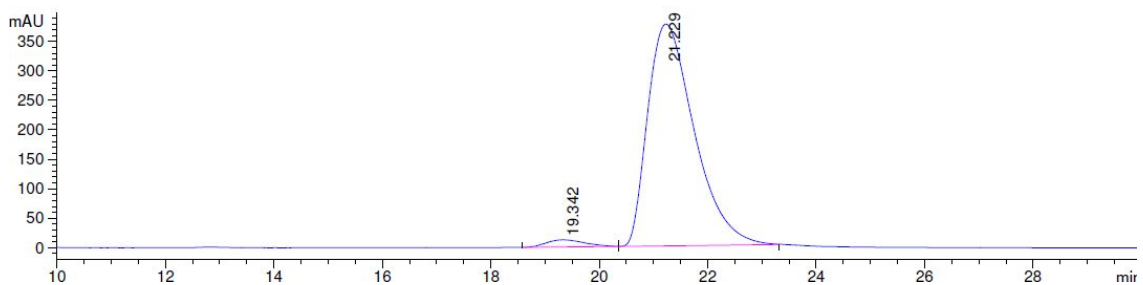

| Peak # | RetTime [min] | Type | Width [min] | Area [mAU*s] | Height [mAU] | Area %  |
|--------|---------------|------|-------------|--------------|--------------|---------|
| 1      | 19.342        | PV   | 0.5920      | 596.37805    | 12.16314     | 2.5917  |
| 2      | 21.229        | VB   | 0.9092      | 2.24146e4    | 376.17514    | 97.4083 |



Enantioselectivity of the remaining starting material (26%, 80:20 er) was determined by chiral HPLC analysis (Chiralpak IB, IPA/hexane 15:85, 1.0 mL/min,  $\lambda=254$  nm).

*Racemic sample*

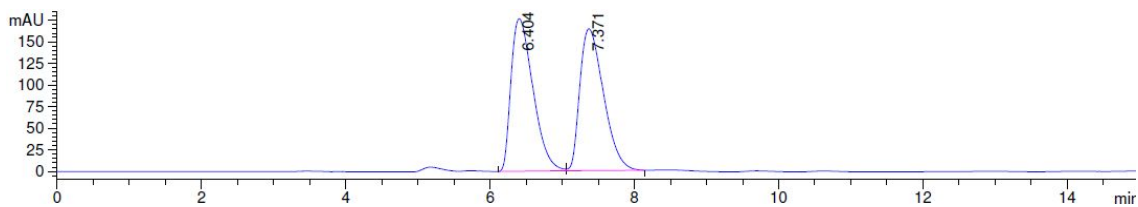

| Peak # | RetTime [min] | Type | Width [min] | Area [mAU*s] | Height [mAU] | Area %  |
|--------|---------------|------|-------------|--------------|--------------|---------|
| 1      | 6.404         | PV   | 0.3336      | 3747.64600   | 176.56641    | 49.9763 |
| 2      | 7.371         | VP   | 0.3605      | 3751.20581   | 164.22641    | 50.0237 |

*Chiral sample*

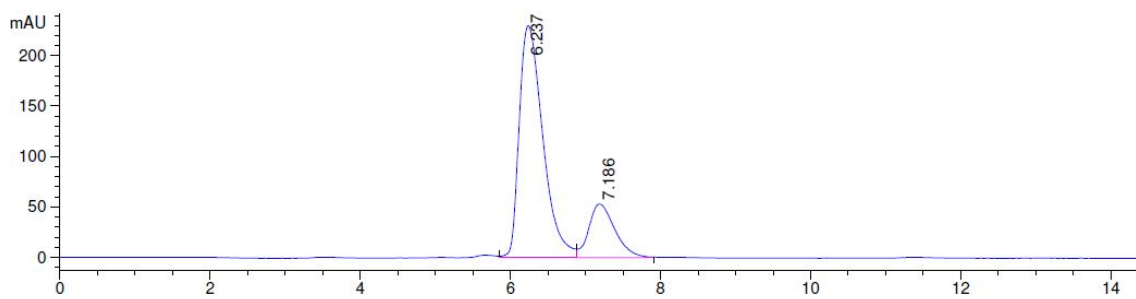

| Peak # | RetTime [min] | Type | Width [min] | Area [mAU*s] | Height [mAU] | Area %  |
|--------|---------------|------|-------------|--------------|--------------|---------|
| 1      | 6.237         | VV   | 0.3411      | 5033.82227   | 230.24834    | 79.7946 |
| 2      | 7.186         | VB   | 0.3725      | 1274.65479   | 53.02093     | 20.2054 |

### Methyl (*S,E*)-3-(2'-hydroxy-3'-methyl-[1,1'-binaphthalen]-2-yl)acrylate (**3ea**)

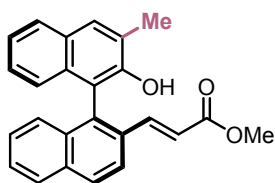

**3ea**

**3ea** was obtained by following the GP (48 h reaction time) after column chromatography (AcOEt/hexane 12:88 to 20:80) as a white solid (44%, 96.5:3.5 er). **Rf**: 0.35 (AcOEt/hexane 20:80, brown in *p*-anisaldehyde). **<sup>1</sup>H NMR** (300 MHz, CDCl<sub>3</sub>) δ: 8.03 (d, *J* = 8.7 Hz, 1H), 7.94 (d, *J* = 8.8 Hz, 2H), 7.81 (d, *J* = 9.7 Hz, 2H), 7.53 (ddd, *J* = 8.1, 6.6, 1.4 Hz, 1H), 7.39 (d, *J* = 16.0 Hz, 1H), 7.34 – 7.22 (m, 3H), 7.15 (ddd, *J* = 8.3, 6.9, 1.4 Hz, 1H), 6.82 (d, *J* = 8.4 Hz, 1H), 6.51 (d, *J* = 16.0 Hz, 1H), 4.71 (s, 1H), 3.63 (s, 3H), 2.52 (s, 3H). **<sup>13</sup>C NMR** (75 MHz, CDCl<sub>3</sub>) δ: 167.1 (CO), 150.7 (COH), 142.3 (CH), 134.8 (C), 133.4 (C), 133.4 (C), 133.2 (C), 132.8 (C), 130.3 (CH), 129.8 (CH), 129.2 (C), 128.4 (CH), 127.8 (CH), 127.7 (CH), 127.6 (CH), 127.0 (CH), 126.7 (C), 126.1 (CH), 124.6 (CH), 123.7 (CH), 123.4 (CH), 120.3 (CH), 115.2 (C), 51.7 (OCH<sub>3</sub>), 17.1 (CH<sub>3</sub>). **HRMS** (APCI+) *m/z* calcd. for C<sub>25</sub>H<sub>21</sub>O<sub>3</sub> [M+H]: 369.1485; found: 369.1485.

Enantioselectivity of the product was determined by chiral HPLC analysis (Chiralpak IA3, IPA/hexane 15:85, flow rate = 1.0 mL/min, λ=254 nm).

#### Racemic sample

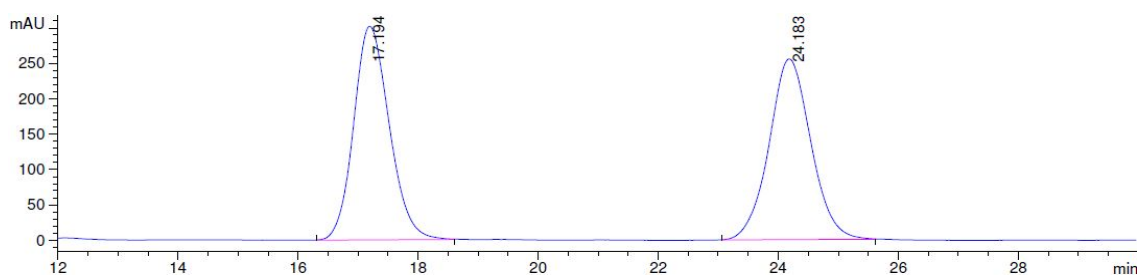

| Peak # | RetTime [min] | Type | Width [min] | Area [mAU*s] | Height [mAU] | Area %  |
|--------|---------------|------|-------------|--------------|--------------|---------|
| 1      | 17.194        | BB   | 0.6370      | 1.24464e4    | 301.85825    | 50.0970 |
| 2      | 24.183        | BB   | 0.7420      | 1.23982e4    | 255.57239    | 49.9030 |

#### Chiral sample

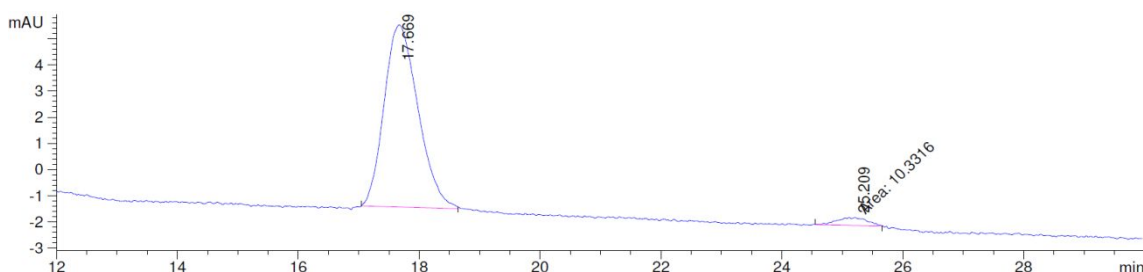

| Peak # | RetTime [min] | Type | Width [min] | Area [mAU*s] | Height [mAU] | Area %  |
|--------|---------------|------|-------------|--------------|--------------|---------|
| 1      | 17.669        | PB   | 0.4890      | 271.03830    | 6.94926      | 96.3281 |
| 2      | 25.209        | MM   | 0.5630      | 10.33162     | 3.05832e-1   | 3.6719  |

Enantioselectivity of the remaining starting material (55%, 81.5:18.5 er) was determined by chiral HPLC analysis (Chiralpak IA3, IPA/hexane 20:80, 1.0 mL/min,  $\lambda=220.4$  nm).

*Racemic sample*

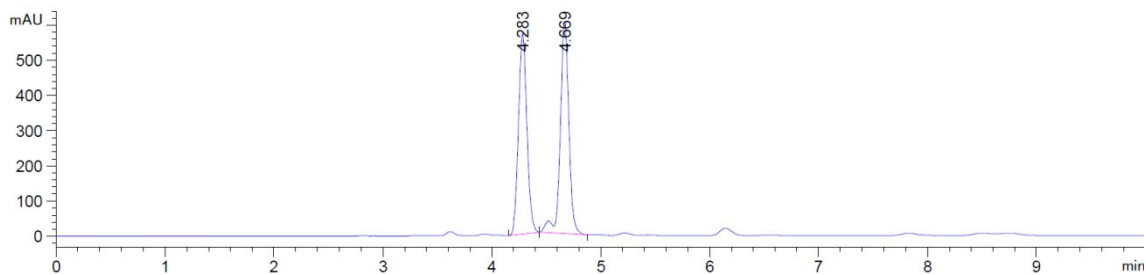

| Peak # | RetTime [min] | Type | Width [min] | Area [mAU*s] | Height [mAU] | Area %  |
|--------|---------------|------|-------------|--------------|--------------|---------|
| 1      | 4.283         | BB   | 0.0827      | 3084.73853   | 573.62024    | 48.2655 |
| 2      | 4.669         | VB R | 0.0811      | 3306.45117   | 603.55884    | 51.7345 |

*Chiral sample*

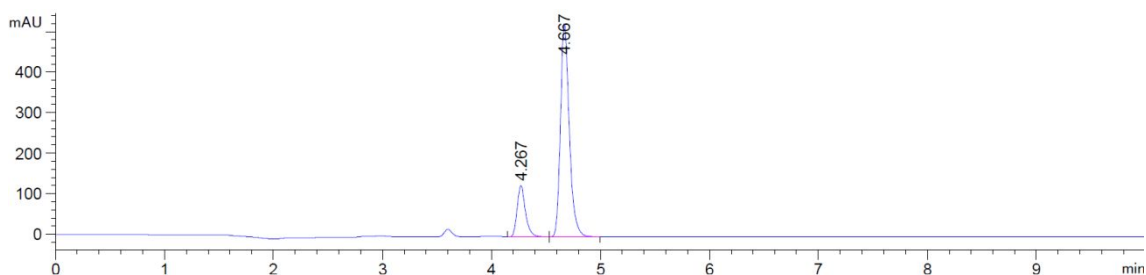

| Peak # | RetTime [min] | Type | Width [min] | Area [mAU*s] | Height [mAU] | Area %  |
|--------|---------------|------|-------------|--------------|--------------|---------|
| 1      | 4.267         | BV   | 0.0820      | 675.00427    | 127.05048    | 18.5197 |
| 2      | 4.667         | VB   | 0.0858      | 2969.77856   | 526.91931    | 81.4803 |

### Methyl (S,E)-3-(3'-fluoro-2'-hydroxy-[1,1'-binaphthalen]-2-yl)acrylate (3fa)

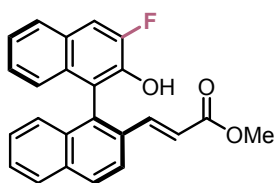

**3fa**

**3fa** was obtained by following the GP (at rt for 17 h) after column chromatography (AcOEt/hexane 5:95 to 20:80) as an orange solid (40%, 92:8 er). **Rf**: 0.38 (AcOEt/hexane 25:75, dark brown in *p*-anisaldehyde). **<sup>1</sup>H NMR** (300 MHz, CDCl<sub>3</sub>) δ: 8.02 (d, *J* = 8.7 Hz, 1H), 7.96 – 7.90 (m, 2H), 7.83 (d, *J* = 8.2 Hz, 1H), 7.70 (d, *J* = 11.1 Hz, 1H), 7.52 (ddd, *J* = 8.1, 6.8, 1.2 Hz, 1H), 7.43 – 7.33 (m, 3H), 7.29 (dd, *J* = 7.0, 1.4 Hz, 1H), 7.24 – 7.15 (m, 2H), 6.92 (d, *J* = 8.5 Hz, 1H), 6.51 (d, *J* = 15.9 Hz, 1H), 5.18 (s, 1H), 3.64 (s, 3H). **<sup>13</sup>C NMR** (75 MHz, CDCl<sub>3</sub>) δ: 167.2 (CO), 151.1 (d, *J* = 245.1 Hz, CF), 142.3 (CH), 141.6 (d, *J* = 16.0 Hz, COH), 134.6 (C), 133.0 (C), 132.4 (C), 130.9 (C), 129.7 (CH), 128.6 (C), 128.4 (CH), 127.7 (d, *J* = 5.3 Hz, CH), 127.5 (d, *J* = 8.0 Hz, CH), 126.8 (C), 126.8 (CH), 126.4 (d, *J* = 2.5 Hz, CH), 125.1 (CH), 125.1 (CH), 125.0 (CH), 123.3 (CH), 120.1 (CH), 119.4 (C), 112.8 (d, *J* = 17.6 Hz, CH), 51.7 (OCH<sub>3</sub>). **<sup>19</sup>F NMR** (282 MHz, CDCl<sub>3</sub>) δ: -136.1. **HRMS** (APCI+) *m/z* calcd. for C<sub>24</sub>H<sub>17</sub>FO<sub>3</sub> [M+H]: 373.1234; found: 373.1235.

Enantioselectivity of the product was determined by chiral HPLC analysis (Chiralpak IF3, IPA/hexane 15:85, 0.5 mL/min, λ=220 nm).

#### Racemic sample

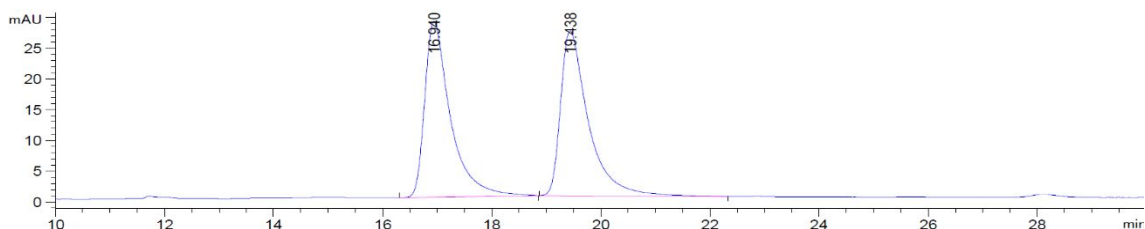

| Peak # | RetTime [min] | Type | Width [min] | Area [mAU*s] | Height [mAU] | Area %  |
|--------|---------------|------|-------------|--------------|--------------|---------|
| 1      | 16.940        | BB   | 0.4809      | 934.17438    | 28.61139     | 49.7473 |
| 2      | 19.438        | BB   | 0.5173      | 943.66437    | 26.77050     | 50.2527 |

#### Chiral sample

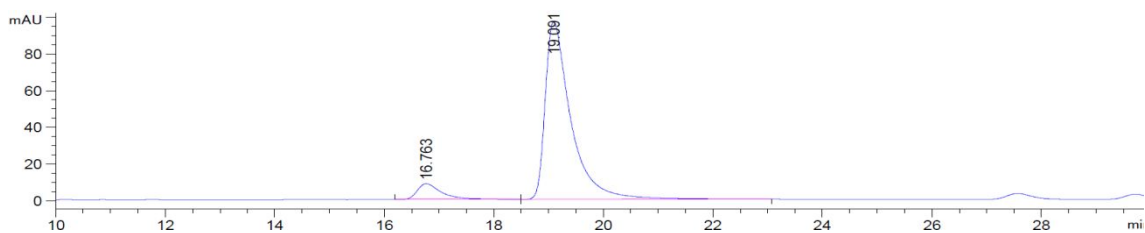

| Peak # | RetTime [min] | Type | Width [min] | Area [mAU*s] | Height [mAU] | Area %  |
|--------|---------------|------|-------------|--------------|--------------|---------|
| 1      | 16.763        | BB   | 0.4552      | 270.06168    | 8.67576      | 7.8534  |
| 2      | 19.091        | BB   | 0.4785      | 3168.71436   | 97.15812     | 92.1466 |

Enantioselectivity of the remaining starting material (36%, 98:2 er) was determined by chiral HPLC analysis (Chiralpak IA3, IPA/hexane 15:85, 0.5 mL/min,  $\lambda=220$  nm).

*Racemic sample*

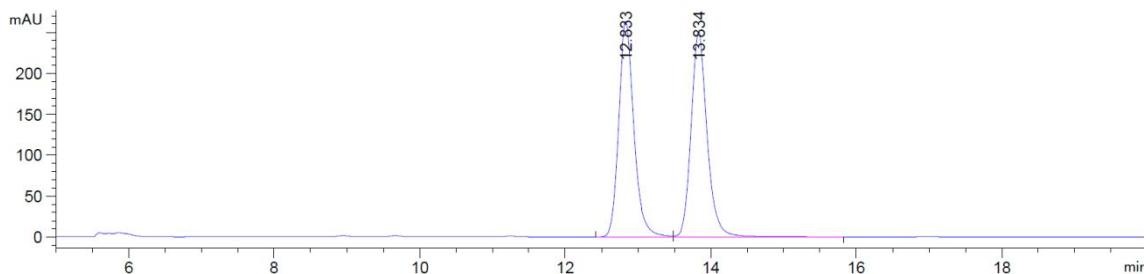

| Peak # | RetTime [min] | Type | Width [min] | Area [mAU*s] | Height [mAU] | Area %  |
|--------|---------------|------|-------------|--------------|--------------|---------|
| 1      | 12.833        | BV   | 0.2209      | 3807.11938   | 262.92841    | 49.8520 |
| 2      | 13.834        | VB   | 0.2345      | 3829.73071   | 250.33888    | 50.1480 |

*Chiral sample*

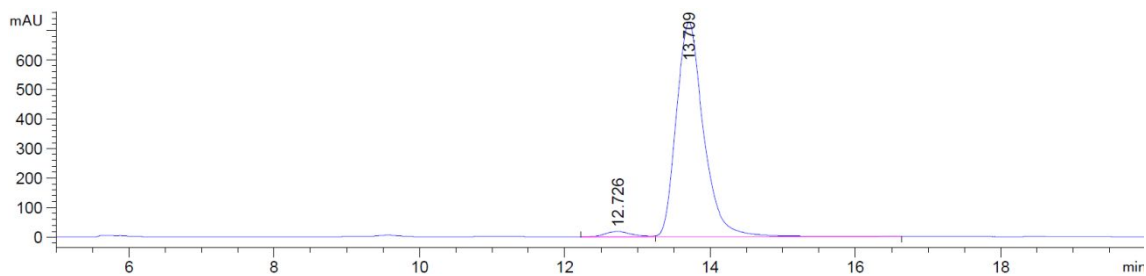

| Peak # | RetTime [min] | Type | Width [min] | Area [mAU*s] | Height [mAU] | Area %  |
|--------|---------------|------|-------------|--------------|--------------|---------|
| 1      | 12.726        | BV E | 0.3713      | 430.57898    | 17.98468     | 2.2273  |
| 2      | 13.709        | VB R | 0.4018      | 1.89016e4    | 725.84869    | 97.7727 |

### Methyl (S,E)-3-(1-(2-hydroxyphenanthren-1-yl)naphthalen-2-yl)acrylate (3ga)

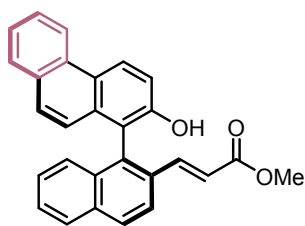

3ga

3ga was obtained by following the GP as a white solid (45%, 95.5:4.5 er). **Rf**: 0.30 (AcOEt/hexane 25:75, brown in *p*-anisaldehyde). **<sup>1</sup>H NMR** (300 MHz, CDCl<sub>3</sub>) δ: 8.83 (d, *J* = 9.1 Hz, 1H), 8.72 (d, *J* = 8.1 Hz, 1H), 8.05 (d, *J* = 8.7 Hz, 1H), 7.94 (d, *J* = 2.1 Hz, 2H), 7.80 (d, *J* = 7.9 Hz, 1H), 7.69 (ddd, *J* = 8.4, 7.0, 1.5 Hz, 1H), 7.59 – 7.46 (m, 4H), 7.42 (d, *J* = 16.0 Hz, 1H), 7.34 – 7.24 (m, 2H), 6.87 (d, *J* = 9.2 Hz, 1H), 6.51 (d, *J* = 16.0 Hz, 1H), 4.80 (s, 1H), 3.60 (s, 3H). **<sup>13</sup>C NMR** (75 MHz, CDCl<sub>3</sub>) δ: 167.0 (CO), 152.2 (COH), 142.1 (CH), 134.7 (C), 133.4 (C), 133.3 (C), 133.1 (C), 132.6 (C), 130.9 (C), 130.7 (C), 129.9 (CH), 128.7 (CH), 128.4 (CH), 128.3 (CH), 127.8 (CH), 127.6 (CH), 127.1 (CH), 126.9 (CH), 126.0 (CH), 125.4 (CH), 125.1 (C), 123.9 (CH), 123.5 (CH), 122.5 (CH), 120.5 (CH), 118.0 (C), 116.7 (CH), 51.7 (OCH<sub>3</sub>). **HRMS** (APCI+) *m/z* calcd. for C<sub>28</sub>H<sub>21</sub>O<sub>3</sub> [M+H]: 405.1485; found: 405.1489.

Enantioselectivity of the product was determined by chiral HPLC analysis (Chiralpak IA3, IPA/hexane 15:85, flow rate = 1.0 mL/min, λ=254 nm).

#### Racemic sample

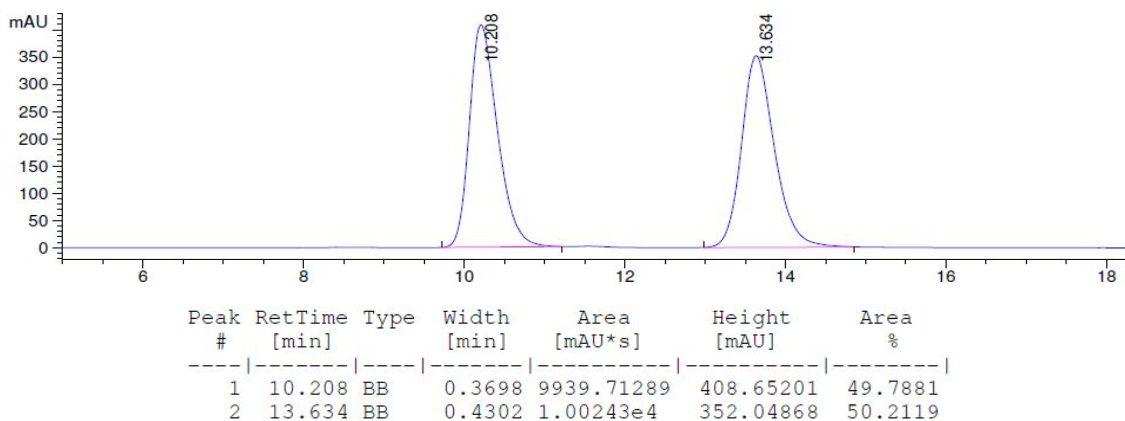

#### Chiral sample

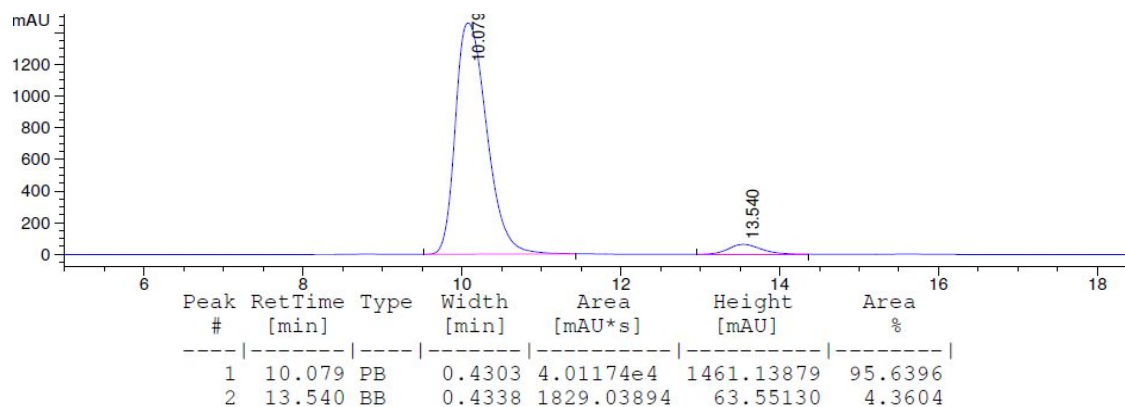

Enantioselectivity of the remaining starting material (48%, 95.5:4.5 er) was determined by chiral HPLC analysis (Chiralpak IA3, IPA/hexane 20:80, 1.0 mL/min,  $\lambda=254$  nm).

*Racemic sample*

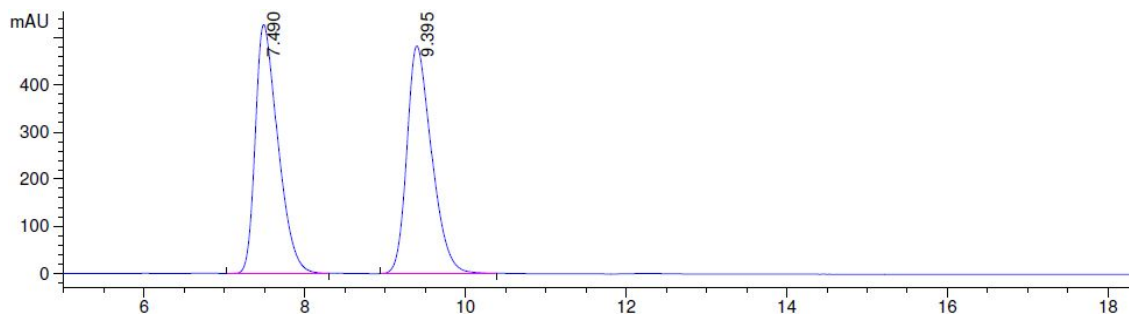

| Peak # | RetTime [min] | Type | Width [min] | Area [mAU*s] | Height [mAU] | Area %  |
|--------|---------------|------|-------------|--------------|--------------|---------|
| 1      | 7.490         | VB   | 0.2967      | 1.03700e4    | 529.09369    | 49.8861 |
| 2      | 9.395         | BB   | 0.3252      | 1.04174e4    | 483.74457    | 50.1139 |

*Chiral sample*

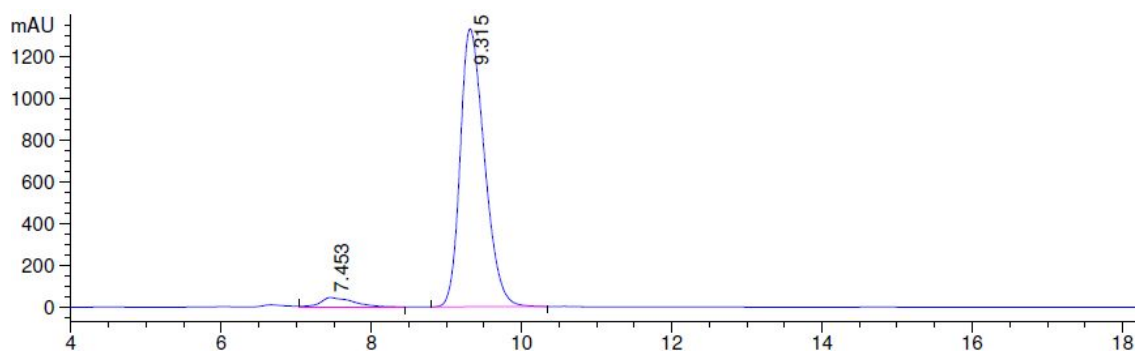

| Peak # | RetTime [min] | Type | Width [min] | Area [mAU*s] | Height [mAU] | Area %  |
|--------|---------------|------|-------------|--------------|--------------|---------|
| 1      | 7.453         | VB   | 0.4094      | 1365.33911   | 44.31547     | 4.3669  |
| 2      | 9.315         | PB   | 0.3463      | 2.99005e4    | 1330.05212   | 95.6331 |



## Methyl (*R,E*)-3-(1-(2-hydroxy-6-methoxyphenyl)naphthalen-2-yl)acrylate (**3ha**)

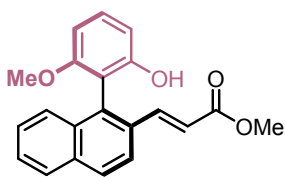

**3ha**

**3ha** was obtained by following the GP (at 50 °C for 26 h, Boc-Val-OH) after column chromatography (AcOEt/hexane 25:75) as a white solid 43%, 95.5:4.5 er). **Rf**: 0.30 (AcOEt/hexane 25:75, pink in *p*-anisaldehyde). **<sup>1</sup>H NMR** (500 MHz, CDCl<sub>3</sub>) δ: 7.93 (d, *J* = 8.7 Hz, 1H), 7.88 (d, *J* = 8.2 Hz, 1H), 7.85 (d, *J* = 8.7 Hz, 1H), 7.59 (d, *J* = 16.0 Hz, 1H), 7.56 – 7.49 (m, 1H), 7.48 (d, *J* = 8.4 Hz, 1H), 7.45 – 7.35 (m, 2H), 6.73 (d, *J* = 8.3 Hz, 1H), 6.67 (d, *J* = 8.3 Hz, 1H), 6.50 (d, *J* = 15.9 Hz, 1H), 4.42 (s, 1H), 3.73 (s, 1H), 3.62 (s, 3H). **<sup>13</sup>C NMR** (126 MHz, CDCl<sub>3</sub>) δ: 167.4 (CO), 158.3 (COH), 154.3 (C), 143.0 (CH), 134.6 (C), 132.9 (C), 132.4 (C), 131.9 (C), 130.6 (CH), 129.4 (CH), 128.4 (CH), 127.5 (CH), 127.4 (CH), 126.6 (CH), 123.3 (CH), 119.6 (CH), 112.1 (C), 108.8 (CH), 103.6 (CH), 56.0 (OCH<sub>3</sub>), 51.8 (OCH<sub>3</sub>). **HRMS** (APCI+) *m/z* calcd. for C<sub>21</sub>H<sub>19</sub>O<sub>4</sub> [M+H]: 335.1278; found: 335.1277.

Enantioselectivity of the product was determined by chiral HPLC analysis (Chiralpak IE3, IPA/hexane 15:85, flow rate = 0.5 mL/min, λ=220 nm).

### Chiral Sample

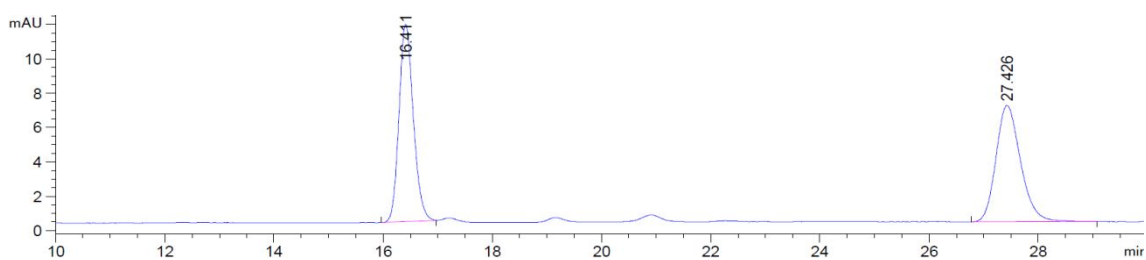

| Peak # | RetTime [min] | Type | Width [min] | Area [mAU*s] | Height [mAU] | Area %  |
|--------|---------------|------|-------------|--------------|--------------|---------|
| 1      | 16.411        | BB   | 0.2804      | 208.79288    | 11.46621     | 49.5737 |
| 2      | 27.426        | BB   | 0.4810      | 212.38356    | 6.78787      | 50.4263 |

### Racemic Sample

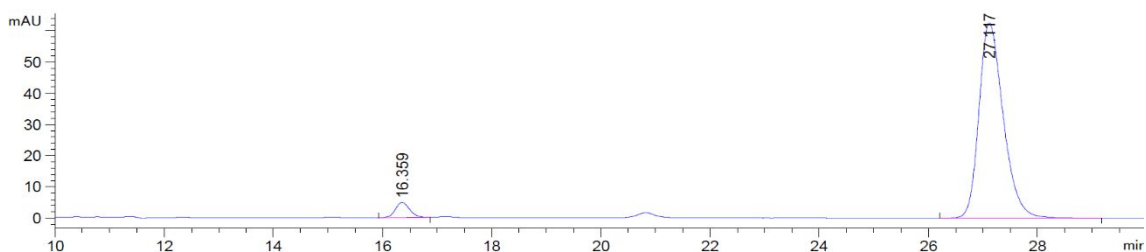

| Peak # | RetTime [min] | Type | Width [min] | Area [mAU*s] | Height [mAU] | Area %  |
|--------|---------------|------|-------------|--------------|--------------|---------|
| 1      | 16.358        | BB   | 0.2749      | 88.58233     | 4.90111      | 4.3773  |
| 2      | 27.117        | BB   | 0.4700      | 1935.10547   | 62.71963     | 95.6227 |



Enantioselectivity of the remaining starting material (30%, >99.5:0.5 er) was determined by chiral HPLC analysis (Chiralpak IA3, IPA/hexane 20:80, 0.5 mL/min,  $\lambda=220$  nm).

*Chiral Sample*

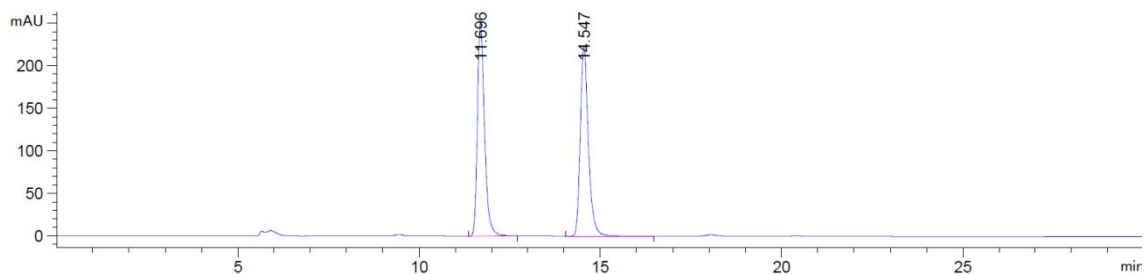

| Peak # | RetTime [min] | Type | Width [min] | Area [mAU*s] | Height [mAU] | Area %  |
|--------|---------------|------|-------------|--------------|--------------|---------|
| 1      | 11.696        | BB   | 0.2073      | 3433.65259   | 251.52771    | 49.8298 |
| 2      | 14.547        | BB   | 0.2346      | 3457.11377   | 223.34483    | 50.1702 |

*Chiral Sample*

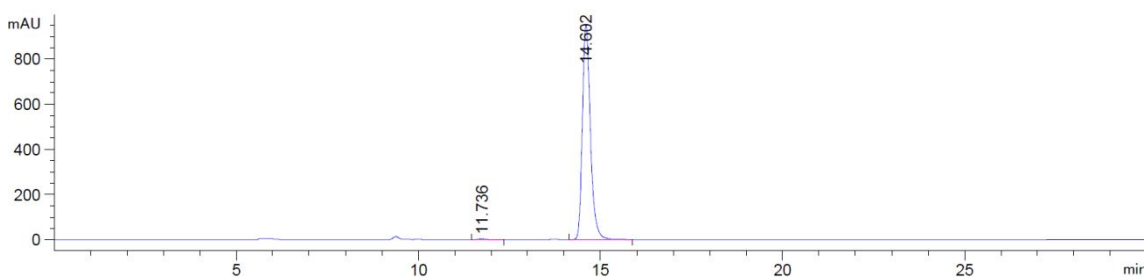

| Peak # | RetTime [min] | Type | Width [min] | Area [mAU*s] | Height [mAU] | Area %  |
|--------|---------------|------|-------------|--------------|--------------|---------|
| 1      | 11.736        | BB   | 0.2071      | 50.63848     | 3.66642      | 0.3474  |
| 2      | 14.602        | BB   | 0.2323      | 1.45277e4    | 950.50488    | 99.6526 |

### Methyl (S,E)-3-(1-(2-hydroxy-6-methylphenyl)naphthalen-2-yl)acrylate (3ia)

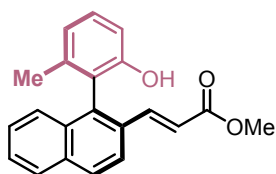

3ia

3ia was obtained by following the GP (at 60 °C for 48 h) after column chromatography (AcOEt/hexane 15:85 to 20:80) as a white solid (40%, 94.5:5.5 er). **Rf**: 0.33 (AcOEt/hexane 25:75, light orange in *p*-anisaldehyde). **<sup>1</sup>H NMR** (300 MHz, CDCl<sub>3</sub>) δ: 7.97 – 7.84 (m, 3H), 7.57 – 7.48 (m, 2H), 7.45 – 7.38 (m, 2H), 7.32 (t, *J* = 7.8 Hz, 1H), 6.97 (d, *J* = 7.5 Hz, 1H), 6.91 (d, *J* = 7.6 Hz, 1H), 6.50 (d, *J* = 16.0 Hz, 1H), 4.31 (s, 1H), 3.72 (s, 3H), 1.82 (s, 3H). **<sup>13</sup>C NMR** (75 MHz, CDCl<sub>3</sub>) δ: 167.2 (CO), 153.4 (COH), 142.2 (CH), 138.6 (C), 134.6 (C), 134.5 (C), 132.6 (C), 131.9 (C), 129.8 (CH), 129.5 (CH), 128.4 (CH), 127.7 (CH), 127.7 (CH), 126.4 (CH), 123.4 (CH), 123.0 (C), 122.6 (CH), 120.1 (CH), 113.3 (CH), 51.8 (OCH<sub>3</sub>), 20.0 (CH<sub>3</sub>). **HRMS** (APCI+) *m/z* calcd. for C<sub>21</sub>H<sub>19</sub>O<sub>3</sub> [M+H]: 319.1329; found: 319.1340.

Enantioselectivity of the product was determined by chiral HPLC analysis (Chiralpak IE3, IPA/hexane 15:85, flow rate = 1.0 mL/min, λ=254 nm).

#### Racemic sample

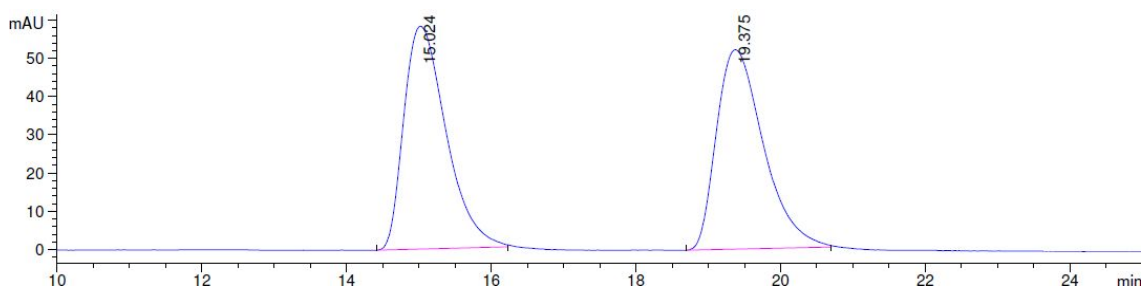

| Peak # | RetTime [min] | Type | Width [min] | Area [mAU*s] | Height [mAU] | Area %  |
|--------|---------------|------|-------------|--------------|--------------|---------|
| 1      | 15.024        | PB   | 0.6214      | 2365.06006   | 58.28360     | 50.0930 |
| 2      | 19.375        | PB   | 0.6990      | 2356.28149   | 52.16713     | 49.9070 |

#### Chiral sample

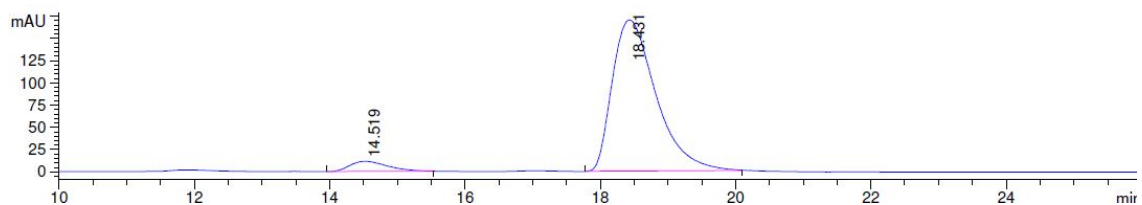

| Peak # | RetTime [min] | Type | Width [min] | Area [mAU*s] | Height [mAU] | Area %  |
|--------|---------------|------|-------------|--------------|--------------|---------|
| 1      | 14.519        | PB   | 0.5493      | 437.21213    | 11.25221     | 5.4247  |
| 2      | 18.431        | PB   | 0.6910      | 7622.46436   | 170.03726    | 94.5753 |

Enantioselectivity of the remaining starting material (38%, 96.5:3.5 er) was determined by chiral HPLC analysis (Chiralpak IA3, IPA/hexane 15:85, 0.5 mL/min,  $\lambda=254$  nm).

*Racemic sample*

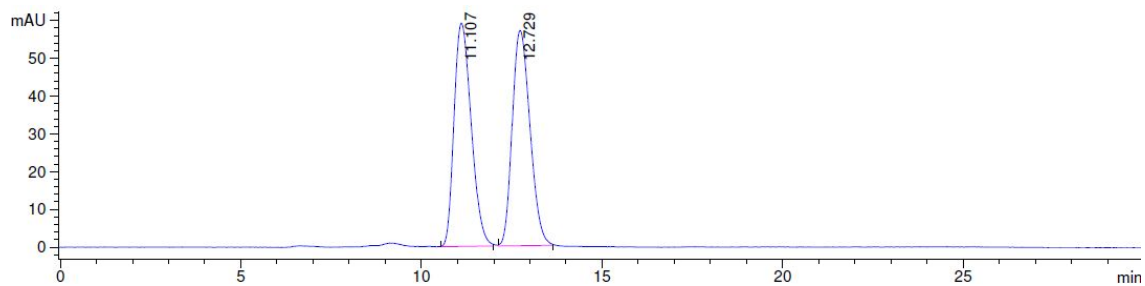

| Peak # | RetTime [min] | Type | Width [min] | Area [mAU*s] | Height [mAU] | Area %  |
|--------|---------------|------|-------------|--------------|--------------|---------|
| 1      | 11.107        | BB   | 0.5194      | 1961.23901   | 59.07012     | 50.1503 |
| 2      | 12.729        | BB   | 0.5272      | 1949.48169   | 56.97868     | 49.8497 |

*Chiral sample*

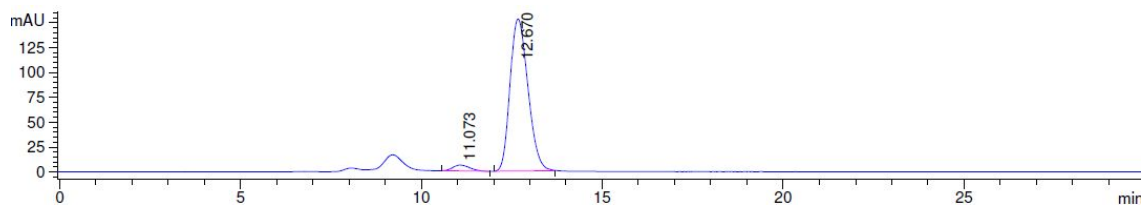

| Peak # | RetTime [min] | Type | Width [min] | Area [mAU*s] | Height [mAU] | Area %  |
|--------|---------------|------|-------------|--------------|--------------|---------|
| 1      | 11.073        | BP   | 0.4260      | 189.78139    | 5.91959      | 3.4764  |
| 2      | 12.670        | BB   | 0.5397      | 5269.27588   | 153.03030    | 96.5236 |

### Methyl (S,E)-3-(2-(2-hydroxynaphthalen-1-yl)-3-methylphenyl)acrylate (3ja)

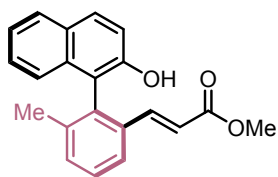

3ja

3ja was obtained by following the GP (at 60 °C) after column chromatography (AcOEt/hexane 10:90 to 15:85) as a white solid (45%, 99:1 er). **Rf**: 0.37 (AcOEt/hexane 25:75, brown in *p*-anisaldehyde). **<sup>1</sup>H NMR** (500 MHz, CDCl<sub>3</sub>) δ: 7.85 (t, *J* = 8.8 Hz, 2H), 7.70 (t, *J* = 4.7 Hz, 1H), 7.45 (d, *J* = 5.1 Hz, 2H), 7.36 – 7.28 (m, 2H), 7.26 (d, *J* = 8.9 Hz, 1H), 7.20 (d, *J* = 16.0 Hz, 1H), 7.01 (dt, *J* = 8.0, 0.8 Hz, 1H), 6.31 (d, *J* = 16.0 Hz, 1H), 4.79 (s, 1H), 3.59 (s, 3H), 1.94 (s, 3H). **<sup>13</sup>C NMR** (126 MHz, CDCl<sub>3</sub>) δ: 167.1 (CO), 150.4 (COH), 142.6 (CH), 140.1 (C), 135.7 (C), 134.0 (C), 132.9 (C), 132.5 (CH), 130.4 (CH), 129.3 (CH), 129.3 (C), 128.5 (CH), 127.1 (CH), 124.9 (CH), 124.1 (CH), 123.7 (CH), 119.9 (CH), 117.6 (CH), 117.2 (C), 51.7 (OCH<sub>3</sub>), 20.0 (CH<sub>3</sub>). **HRMS** (APCI+) *m/z* calcd. for C<sub>21</sub>H<sub>19</sub>O<sub>3</sub> [M+H]: 319.1329; found: 319.1338.

Enantioselectivity of the product was determined by chiral HPLC analysis (Chiralpak IE3, IPA/hexane 15:85, 0.5 mL/min, λ=254 nm).

#### Racemic sample

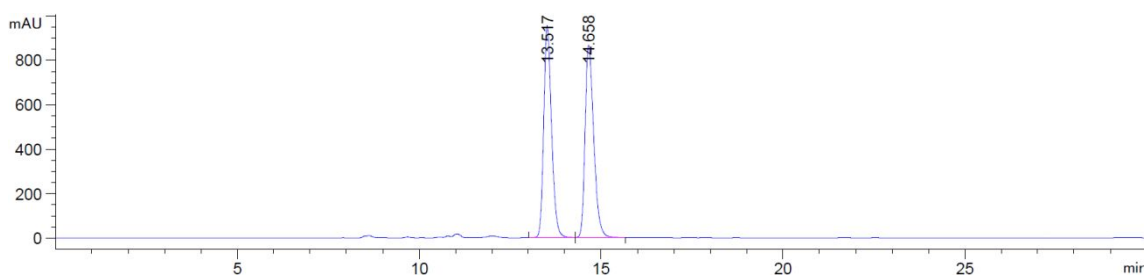

| Peak # | RetTime [min] | Type | Width [min] | Area [mAU*s] | Height [mAU] | Area %  |
|--------|---------------|------|-------------|--------------|--------------|---------|
| 1      | 13.517        | BB   | 0.2305      | 1.42899e4    | 955.53479    | 50.0015 |
| 2      | 14.658        | BB   | 0.2525      | 1.42890e4    | 865.80457    | 49.9985 |

#### Chiral sample

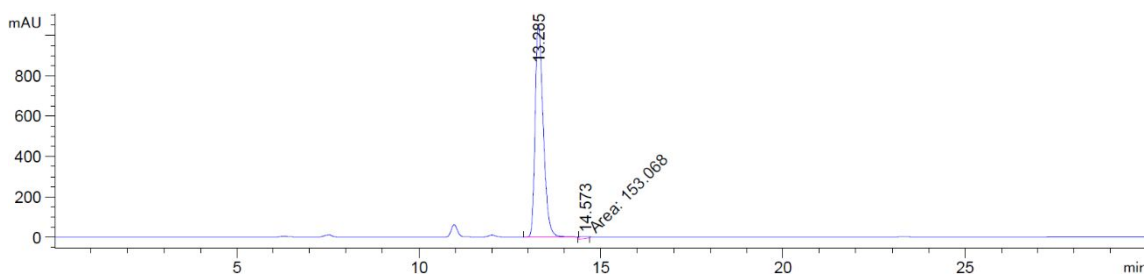

| Peak # | RetTime [min] | Type | Width [min] | Area [mAU*s] | Height [mAU] | Area %  |
|--------|---------------|------|-------------|--------------|--------------|---------|
| 1      | 13.285        | BB   | 0.2387      | 1.63492e4    | 1055.33435   | 99.0724 |
| 2      | 14.573        | MM   | 0.2579      | 153.06758    | 8.70502      | 0.9276  |

Enantioselectivity of the remaining starting material (51%, 91.5:8.5 er) was determined by chiral HPLC analysis (Chiralpak IA3, IPA/hexane 15:85, 0.5 mL/min,  $\lambda=220$  nm).

*Racemic sample*

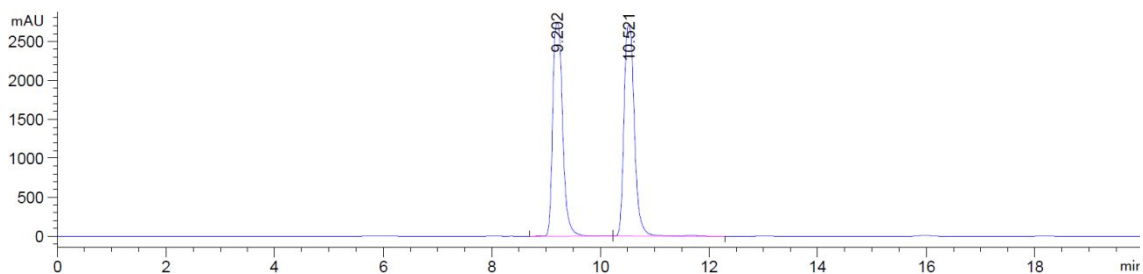

| Peak # | RetTime [min] | Type | Width [min] | Area [mAU*s] | Height [mAU] | Area %  |
|--------|---------------|------|-------------|--------------|--------------|---------|
| 1      | 9.202         | VB R | 0.1973      | 3.46102e4    | 2739.46777   | 49.1314 |
| 2      | 10.521        | BV R | 0.2054      | 3.58339e4    | 2707.85254   | 50.8686 |

*Chiral Sample*

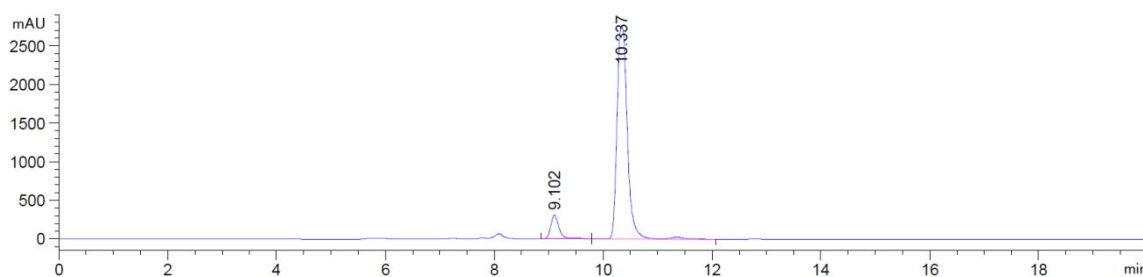

| Peak # | RetTime [min] | Type | Width [min] | Area [mAU*s] | Height [mAU] | Area %  |
|--------|---------------|------|-------------|--------------|--------------|---------|
| 1      | 9.102         | BV R | 0.1560      | 3379.35498   | 308.94702    | 8.5567  |
| 2      | 10.337        | VV R | 0.2026      | 3.61145e4    | 2763.67578   | 91.4433 |

**Methyl (S,E)-3-(5-methoxy-2-(2-hydroxynaphthalen-1-yl)-3-methylphenyl)acrylate (3ka)**

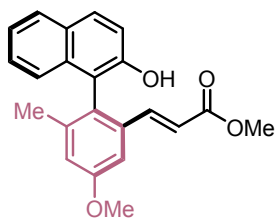

**3ka**

**3ka** was obtained by following the GP (at 60 °C) after column chromatography (AcOEt/hexane 15:85 to 25:75) as a cream solid (46%, 92:8 er). **Rf**: 0.28 (AcOEt/hexane 25:75, light brown in *p*-anisaldehyde). **<sup>1</sup>H NMR** (300 MHz, CDCl<sub>3</sub>) δ: 7.89 – 7.83 (m, 2H), 7.36 – 7.31 (m, 2H), 7.28 (d, *J* = 9.0 Hz, 1H), 7.23 – 7.15 (m, 2H), 7.08 – 7.03 (m, 2H), 6.32 (d, *J* = 15.4 Hz, 1H), 4.85 (s, 1H), 3.93 (s, 3H), 3.61 (s, 3H), 1.93 (s, 3H). **<sup>13</sup>C NMR** (75 MHz, CDCl<sub>3</sub>) δ: 167.0 (CO), 160.1 (COMe), 150.9 (COH), 142.7 (CH), 141.7 (C), 136.9 (C), 133.5 (C), 130.3 (CH), 129.3 (C), 128.4 (CH), 127.0 (CH), 126.2 (C), 124.2 (CH), 123.6 (CH), 120.0 (CH), 118.8 (CH), 117.4 (CH), 117.0 (C), 109.4 (CH), 55.5 (OCH<sub>3</sub>), 51.7 (OCH<sub>3</sub>), 20.3 (CH<sub>3</sub>). **HRMS** (APCI+) *m/z* calcd. for C<sub>22</sub>H<sub>21</sub>O<sub>4</sub> [M+H]: 349.1434; found: 349.1437.

Enantioselectivity of the product was determined by chiral HPLC analysis (Chiralpak IE3, IPA/hexane 15:85, 0.5 mL/min, λ=254 nm).

**Racemic sample**

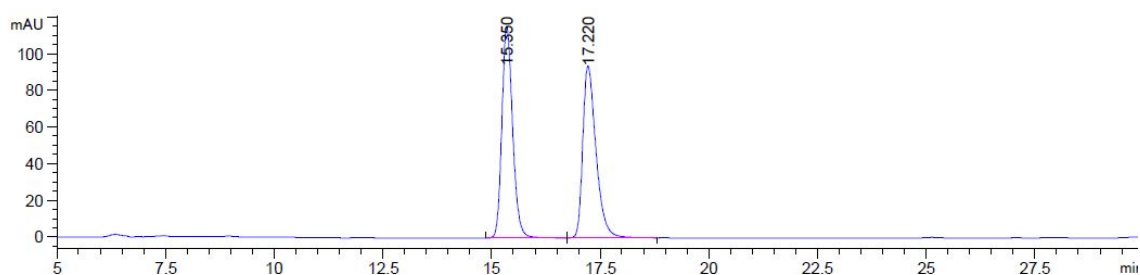

| Peak # | RetTime [min] | Type | Width [min] | Area [mAU*s] | Height [mAU] | Area %  |
|--------|---------------|------|-------------|--------------|--------------|---------|
| 1      | 15.350        | BB   | 0.2644      | 1981.61157   | 115.38930    | 50.0280 |
| 2      | 17.220        | BB   | 0.3226      | 1979.39514   | 93.62877     | 49.9720 |

**Chiral sample**

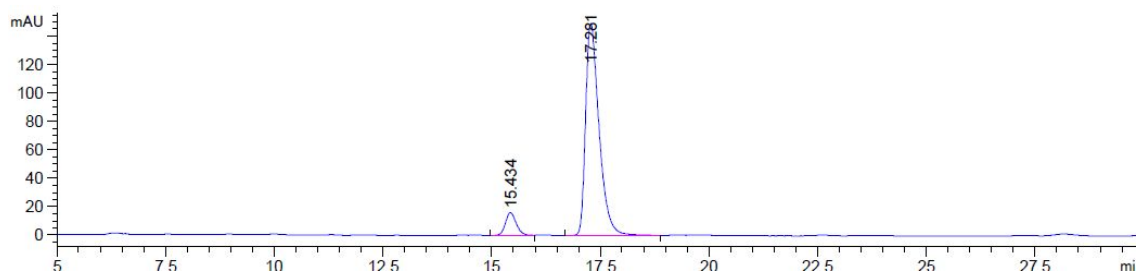

| Peak # | RetTime [min] | Type | Width [min] | Area [mAU*s] | Height [mAU] | Area %  |
|--------|---------------|------|-------------|--------------|--------------|---------|
| 1      | 15.434        | BB   | 0.2618      | 273.95554    | 16.00040     | 7.8789  |
| 2      | 17.281        | BB   | 0.3265      | 3203.11304   | 149.19524    | 92.1211 |

Enantioselectivity of the remaining starting material (40%, 88:12 er) was determined by chiral HPLC analysis (Chiralpak IA3, IPA/hexane 15:85, 0.5 mL/min,  $\lambda=220$  nm).

*Racemic sample*

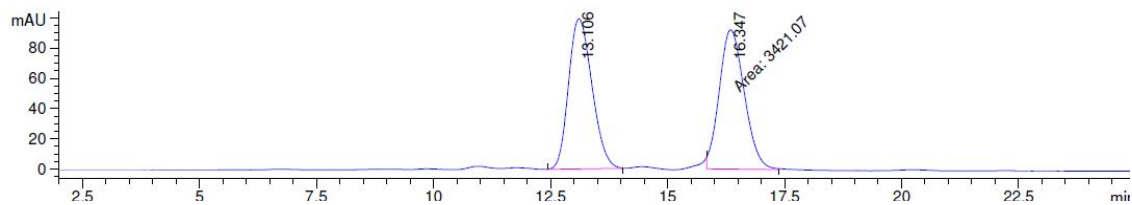

| Peak # | RetTime [min] | Type | Width [min] | Area [mAU*s] | Height [mAU] | Area %  |
|--------|---------------|------|-------------|--------------|--------------|---------|
| 1      | 13.106        | BB   | 0.5424      | 3448.09399   | 98.98386     | 50.1967 |
| 2      | 16.347        | MM   | 0.6204      | 3421.07275   | 91.89847     | 49.8033 |

*Chiral sample*

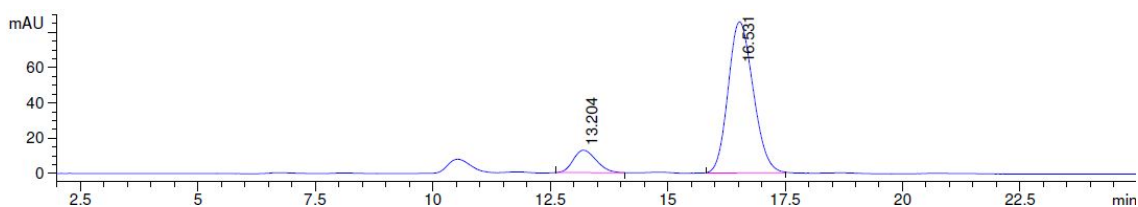

| Peak # | RetTime [min] | Type | Width [min] | Area [mAU*s] | Height [mAU] | Area %  |
|--------|---------------|------|-------------|--------------|--------------|---------|
| 1      | 13.204        | BB   | 0.5132      | 432.92471    | 12.71729     | 11.9798 |
| 2      | 16.531        | BB   | 0.5770      | 3180.87451   | 85.71182     | 88.0202 |

**Methyl (S,E)-3-(5-fluoro-2-(2-hydroxynaphthalen-1-yl)-3-methylphenyl)acrylate  
(3la)**

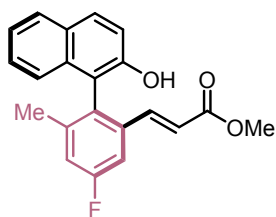

**3la**

**3la** was obtained by following the GP (at 60 °C) after column chromatography (AcOEt/hexane 10:90 to 20:80) as a white solid (43%, 96.5:3.5 er). **Rf**: 0.35 (AcOEt/hexane 25:75, light brown in *p*-anisaldehyde). **<sup>1</sup>H NMR** (300 MHz, CDCl<sub>3</sub>) δ: 7.90 – 7.79 (m, 2H), 7.41 – 7.30 (m, 3H), 7.24 (d, *J* = 7.0 Hz, 1H), 7.20 – 7.09 (m, 2H), 7.02 – 6.95 (m, 1H), 6.29 (d, *J* = 15.9 Hz, 1H), 4.74 (s, 1H), 3.60 (s, 3H), 1.93 (s, 3H). **<sup>13</sup>C NMR** (75 MHz, CDCl<sub>3</sub>) δ: 166.7 (CO), 163.0 (d, *J* = 247 Hz, CF), 150.7 (COH), 142.9 (d, *J* = 8.0 Hz, C), 141.6 (d, *J* = 2.9 Hz, CH), 137.8 (d, *J* = 7.8 Hz, C), 133.1 (C), 130.6 (CH), 129.3 (C), 128.6 (CH), 127.3 (CH), 123.9 (d, *J* = 2.9 Hz, 2CH), 121.0 (CH), 119.4 (d, *J* = 21.0 Hz, CH), 117.6 (CH), 116.3 (C), 111.3 (d, *J* = 21.0 Hz, CH), 51.8 (OCH<sub>3</sub>), 20.2 (CH<sub>3</sub>). **<sup>19</sup>F NMR** (282 MHz, CDCl<sub>3</sub>) δ: -113.0 (t, *J* = 9.4 Hz). **HRMS** (APCI+) *m/z* calcd. for C<sub>21</sub>H<sub>18</sub>FO<sub>3</sub> [M+H]: 337.1234; found: 337.1234.

Enantioselectivity of the product was determined by chiral HPLC analysis (Chiralpak IB, IPA/hexane 15:85, 0.5 mL/min, λ=254 nm).

**Racemic sample**

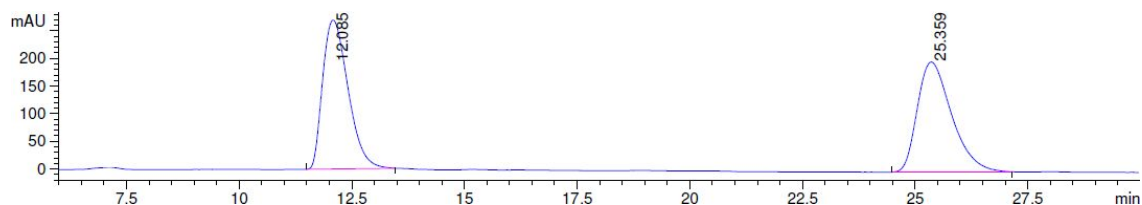

| Peak # | RetTime [min] | Type | Width [min] | Area [mAU*s] | Height [mAU] | Area %  |
|--------|---------------|------|-------------|--------------|--------------|---------|
| 1      | 12.085        | PB   | 0.6211      | 1.05535e4    | 269.33380    | 50.0529 |
| 2      | 25.359        | BB   | 0.7957      | 1.05312e4    | 198.90410    | 49.9471 |

**Chiral sample**

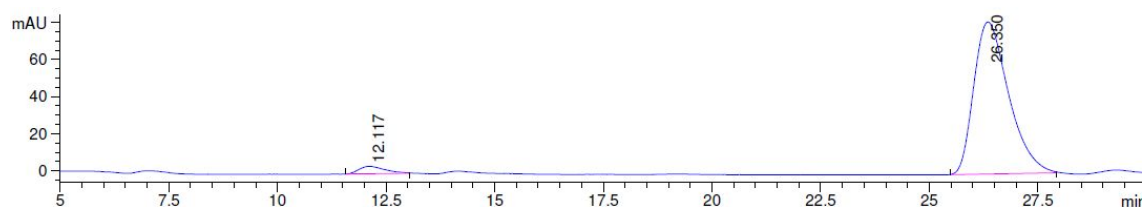

| Peak # | RetTime [min] | Type | Width [min] | Area [mAU*s] | Height [mAU] | Area %  |
|--------|---------------|------|-------------|--------------|--------------|---------|
| 1      | 12.117        | PB   | 0.5042      | 165.38063    | 3.93569      | 3.4930  |
| 2      | 26.350        | BB   | 0.8487      | 4569.23730   | 81.92039     | 96.5070 |



Enantioselectivity of the remaining starting material (45%, 91.5:8.5 er) was determined by chiral HPLC analysis (Chiralpak IA3, IPA/hexane 15:85, 0.5 mL/min,  $\lambda=220$  nm).

*Racemic sample*

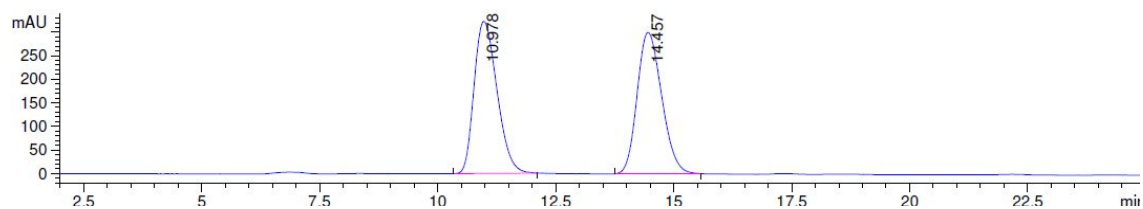

| Peak # | RetTime [min] | Type | Width [min] | Area [mAU*s] | Height [mAU] | Area %  |
|--------|---------------|------|-------------|--------------|--------------|---------|
| 1      | 10.978        | BB   | 0.5382      | 1.09013e4    | 322.64209    | 50.0672 |
| 2      | 14.457        | BB   | 0.5726      | 1.08721e4    | 300.15512    | 49.9328 |

*Chiral sample*

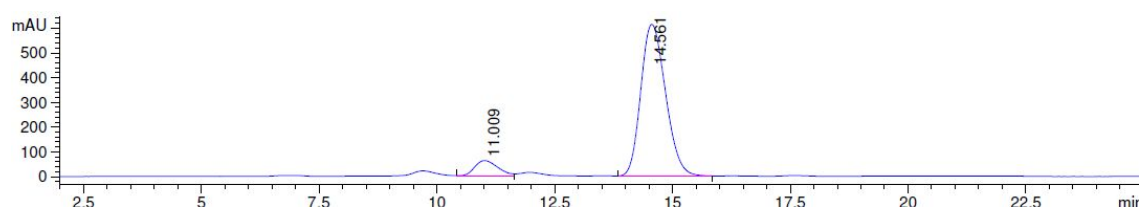

| Peak # | RetTime [min] | Type | Width [min] | Area [mAU*s] | Height [mAU] | Area %  |
|--------|---------------|------|-------------|--------------|--------------|---------|
| 1      | 11.009        | VV   | 0.5368      | 2108.85352   | 61.38950     | 8.6239  |
| 2      | 14.561        | BB   | 0.5775      | 2.23447e4    | 612.68250    | 91.3761 |

### Methyl (*R,E*)-3-(2-(2-hydroxynaphthalen-1-yl)-[1,1'-biphenyl]-3-yl)acrylate (**3ma**)

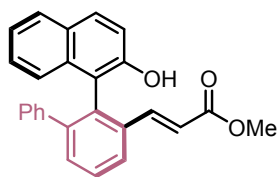

**3ma**

**3ma** was obtained by following the GP (at 60 °C) after column chromatography (AcOEt/hexane 10:90 to 20:80) as a white solid (48%, 94:6 er). **Rf**: 0.26 (AcOEt/hexane 25:75, light orange in *p*-anisaldehyde). **<sup>1</sup>H NMR** (500 MHz, CDCl<sub>3</sub>) δ: 7.90 (dd, *J* = 7.6, 1.6 Hz, 1H), 7.77 – 7.73 (m, 2H), 7.68 – 7.61 (m, 2H), 7.34 – 7.27 (m, 3H), 7.14 (d, *J* = 7.3 Hz, 1H), 7.09 (d, *J* = 8.9 Hz, 1H), 7.07 – 7.01 (m, 5H), 6.42 (d, *J* = 16.0 Hz, 1H), 4.90 (s, 1H), 3.64 (s, 3H). **<sup>13</sup>C NMR** (126 MHz, CDCl<sub>3</sub>) δ: 167.0 (CO), 150.7 (COH), 145.1 (C), 142.7 (CH), 140.2 (C), 136.2 (C), 133.6 (C), 133.2 (C), 132.6 (CH), 130.4 (CH), 129.4 (CH), 128.8 (C), 128.4 (2CH), 128.3 (CH), 127.6 (2CH), 127.2 (CH), 126.9 (CH), 126.3 (CH), 124.6 (CH), 123.5 (CH), 120.3 (CH), 117.4 (C), 117.2 (CH), 51.7 (OCH<sub>3</sub>). **HRMS** (APCI+) *m/z* calcd. for C<sub>26</sub>H<sub>20</sub>O<sub>3</sub> [M+H]: 381.1485; found: 381.1481.

Enantioselectivity of the product was determined by chiral HPLC analysis (Chiralpak IE3, IPA/hexane 15:85, flow rate = 0.5 mL/min, λ=220 nm).

#### Racemic Sample

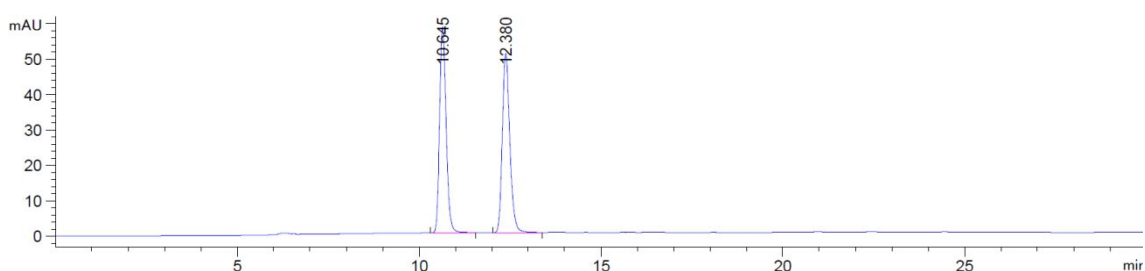

| Peak # | RetTime [min] | Type | Width [min] | Area [mAU*s] | Height [mAU] | Area %  |
|--------|---------------|------|-------------|--------------|--------------|---------|
| 1      | 10.645        | BB   | 0.1911      | 722.30890    | 58.09529     | 50.0234 |
| 2      | 12.380        | BB   | 0.2186      | 721.63422    | 50.53850     | 49.9766 |

#### Chiral Sample

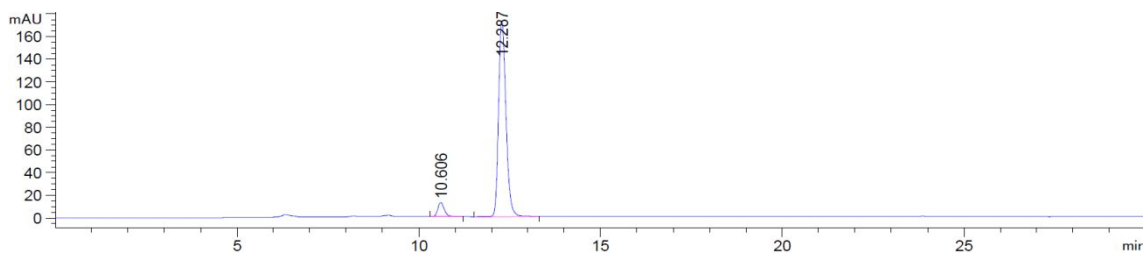

| Peak # | RetTime [min] | Type | Width [min] | Area [mAU*s] | Height [mAU] | Area %  |
|--------|---------------|------|-------------|--------------|--------------|---------|
| 1      | 10.606        | BB   | 0.1925      | 157.41000    | 12.53261     | 6.0569  |
| 2      | 12.287        | BB   | 0.2167      | 2441.44604   | 172.96353    | 93.9431 |

Enantioselectivity of the remaining starting material (51%, 97:3 er) was determined by chiral HPLC analysis (Chiralpak IA3, IPA/hexane 15:85, 0.5 mL/min,  $\lambda=300$  nm).

**Racemic Sample**

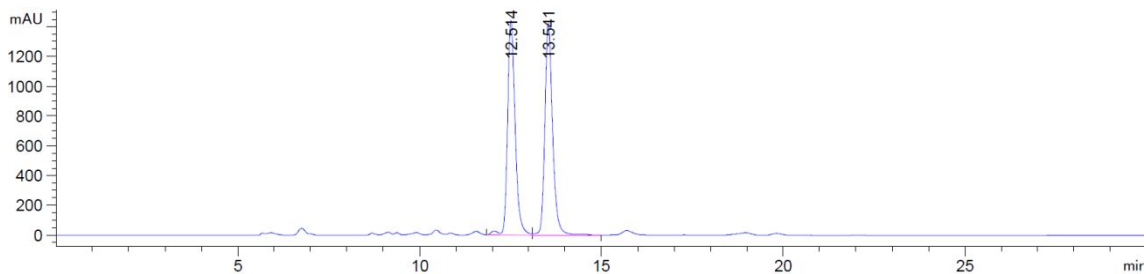

| Peak # | RetTime [min] | Type | Width [min] | Area [mAU*s] | Height [mAU] | Area %  |
|--------|---------------|------|-------------|--------------|--------------|---------|
| 1      | 12.514        | VV R | 0.2208      | 2.09352e4    | 1442.16321   | 49.7297 |
| 2      | 13.541        | VV R | 0.2250      | 2.11628e4    | 1424.97925   | 50.2703 |

**Chiral Sample**

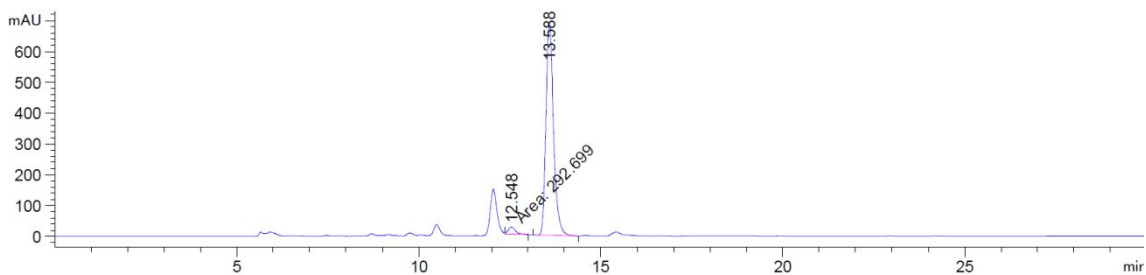

| Peak # | RetTime [min] | Type | Width [min] | Area [mAU*s] | Height [mAU] | Area %  |
|--------|---------------|------|-------------|--------------|--------------|---------|
| 1      | 12.548        | FM   | 0.2149      | 292.69907    | 22.69707     | 2.8526  |
| 2      | 13.588        | BB   | 0.2198      | 9968.07813   | 692.97369    | 97.1474 |

### 4.3. Gram scale kinetic resolution of *rac*-**1j**

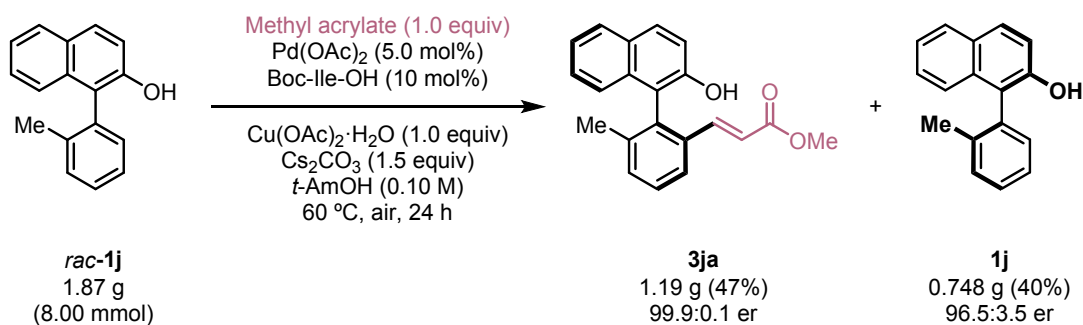

*rac*-**1j** (1.87 g, 8.00 mmol, 1.00 equiv), Pd(OAc)<sub>2</sub> (90 mg, 5.0 mol%), Boc-Ile-OH (185 mg, 10 mol%), Cu(OAc)<sub>2</sub>·H<sub>2</sub>O (1.60 g, 8.00 mmol, 1.00 equiv) and Cs<sub>2</sub>CO<sub>3</sub> (3.91 g, 12.0 mmol, 1.50 equiv) were weighed and added into a 250 mL one-necked RBF flask under air. Then, *t*-AmOH (80 mL, 0.10 M) and methyl acrylate (725 μL, 8.00 mmol, 1.00 equiv) were added. The flask was sealed with a rubber septum and the mixture was stirred under air at 60 °C for 24 h. After cooling to rt, the reaction mixture was filtered through a Celite pad, washing the flask and the pad with AcOEt. The filtrate was concentrated under reduced pressure and the resulting residue was purified by flash column chromatography (AcOEt/hexane 5:95 to 20:80) to afford 0.748 g (40%, 96.4:3.6 er) of **1j** and 1.19 g (47%, 99.9:0.1 er) of **3ja**.

Enantioselectivity of the product was determined by chiral HPLC analysis (Chiralpak IE3, IPA/hexane 15:85, 0.5 mL/min,  $\lambda=254$  nm).

*Racemic sample*

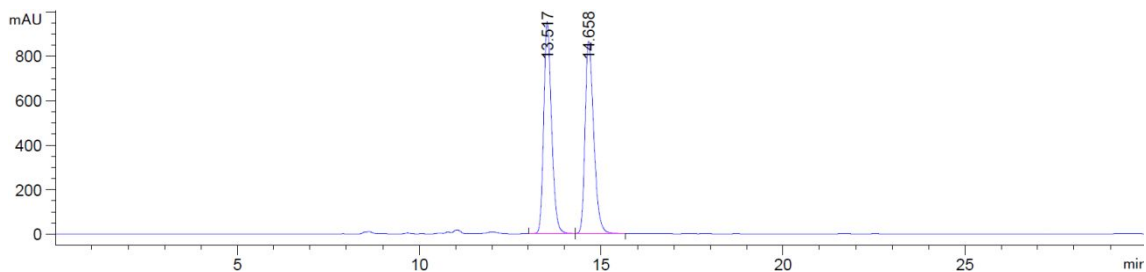

| Peak # | RetTime [min] | Type | Width [min] | Area [mAU*s] | Height [mAU] | Area %  |
|--------|---------------|------|-------------|--------------|--------------|---------|
| 1      | 13.517        | BB   | 0.2305      | 1.42899e4    | 955.53479    | 50.0015 |
| 2      | 14.658        | BB   | 0.2525      | 1.42890e4    | 865.80457    | 49.9985 |

*Chiral sample*

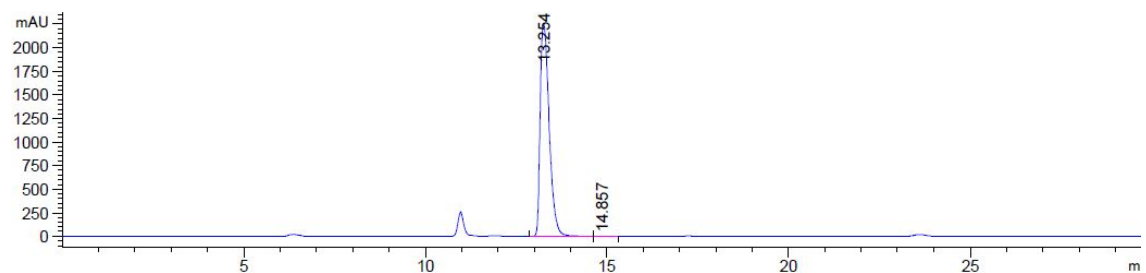

| Peak # | RetTime [min] | Type | Width [min] | Area [mAU*s] | Height [mAU] | Area %  |
|--------|---------------|------|-------------|--------------|--------------|---------|
| 1      | 13.254        | BB   | 0.2680      | 3.87410e4    | 2259.54883   | 99.9278 |
| 2      | 14.857        | BB   | 0.2560      | 27.98061     | 1.68289      | 0.0722  |

Enantioselectivity of the remaining starting material was determined by chiral HPLC analysis (Chiralpak IA3, IPA/hexane 15:85, 0.5 mL/min,  $\lambda=220$  nm).

*Racemic sample*

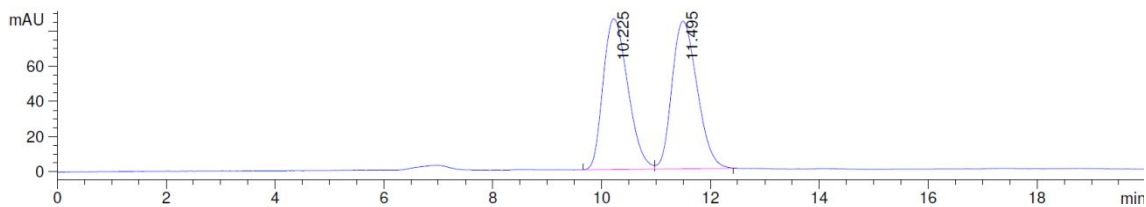

| Peak # | RetTime [min] | Type | Width [min] | Area [mAU*s] | Height [mAU] | Area %  |
|--------|---------------|------|-------------|--------------|--------------|---------|
| 1      | 10.225        | BV   | 0.4943      | 2706.71094   | 85.73557     | 50.0038 |
| 2      | 11.495        | VB   | 0.5078      | 2706.30054   | 84.01353     | 49.9962 |

*Chiral Sample*

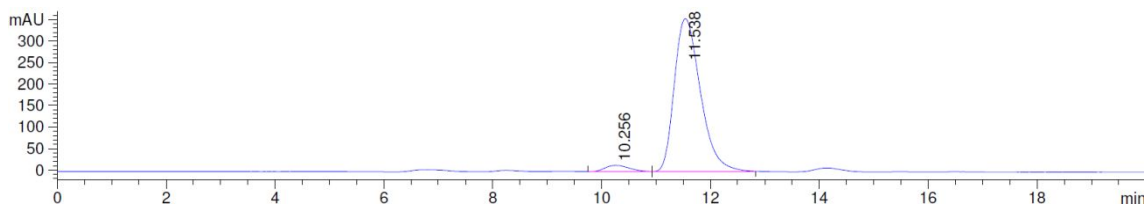

| Peak # | RetTime [min] | Type | Width [min] | Area [mAU*s] | Height [mAU] | Area %  |
|--------|---------------|------|-------------|--------------|--------------|---------|
| 1      | 10.256        | PV   | 0.4308      | 442.24673    | 14.54315     | 3.5953  |
| 2      | 11.538        | VB   | 0.5194      | 1.18585e4    | 355.32376    | 96.4047 |

## 4.4. Mechanistic experiments

### 4.4.1. Synthesis of the deuterated starting material ( $d_7$ -1a)

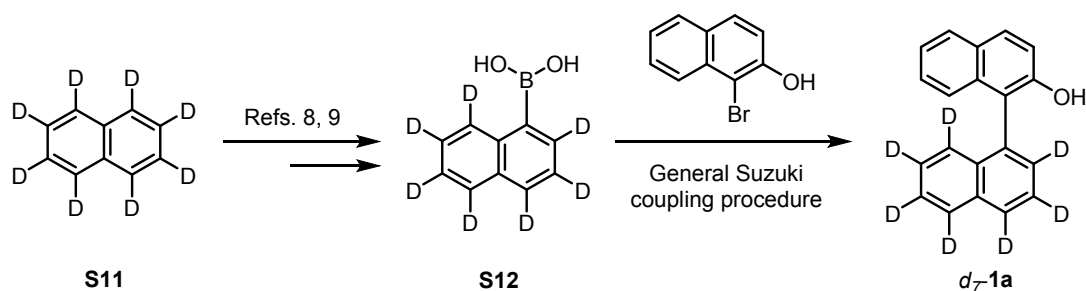

Compound **S12** was synthesized from naphthalene- $d_8$  (**S11**) following reported procedures<sup>8,9</sup>. **S12** was converted to  $d_7$ -1a by the general Suzuki coupling procedure for the substrate synthesis. Its  $^1\text{H}$  NMR spectrum is shown below.

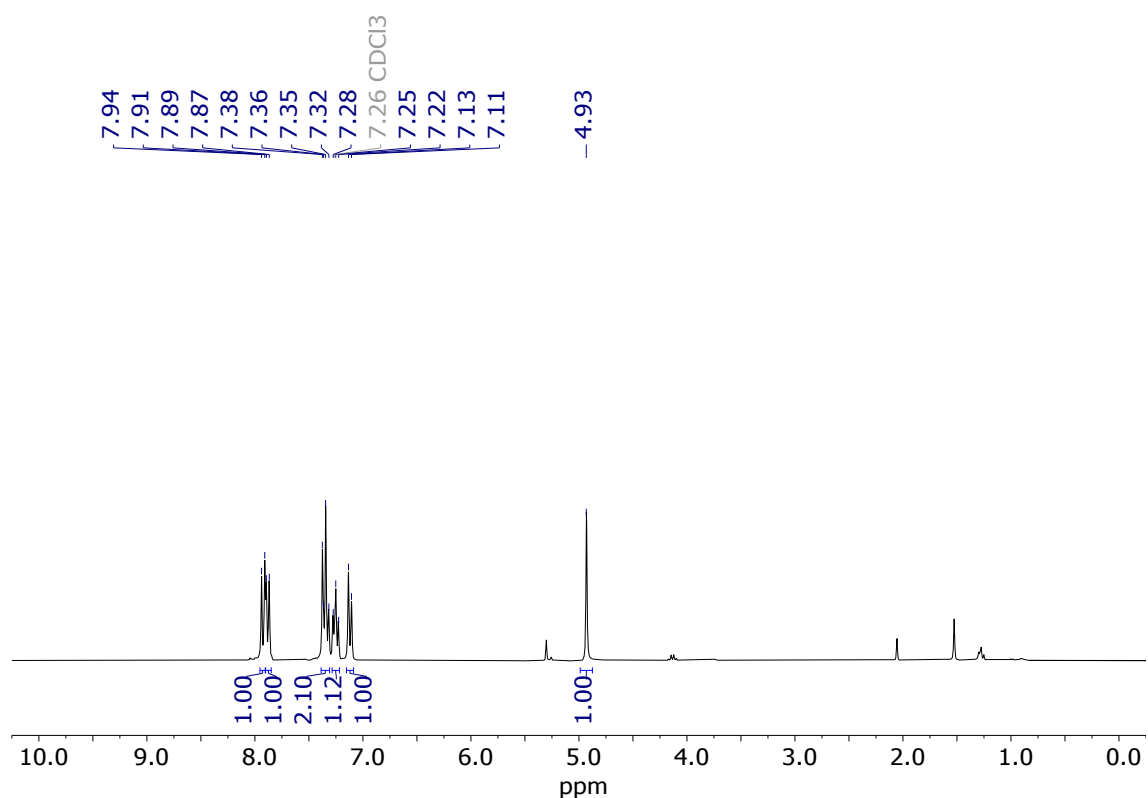

<sup>8</sup> Wang, Q.; Zhang, W.; Song, H.; Wang, J.; Zheng, C.; Gu, Q.; You, S. *J. Am. Chem. Soc.* **2020**, *142*, 15678-15685.

<sup>9</sup> Bonvallet, P. A.; Breitkreuz, C. J.; Kim, Y. S.; Todd, E. M.; Traynor, K.; Fry, C. G.; Ediger, M. D.; McMahon, R. *J. Org. Chem.* **2007**, *72*, 10051-10057.





## 5. Other reactions

### 5.1. Attempt of desymmetrization of 1-phenyl-2-naphthol (1n)

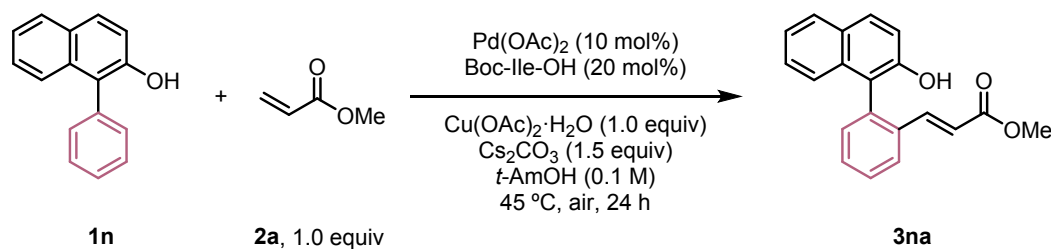

**1n** (22 mg, 0.10 mmol, 1.0 equiv), Pd(OAc)<sub>2</sub> (2.2 mg, 10 mol%), Boc-Ile-OH (4.6 mg, 20 mol%), Cu(OAc)<sub>2</sub>·H<sub>2</sub>O (20 mg, 1.0 equiv) and Cs<sub>2</sub>CO<sub>3</sub> (49 mg, 1.5 equiv) were weighed and added into a Schlenk flask under air. Then, *t*-AmOH (1.0 mL, 0.10 M) and methyl acrylate (0.10 mmol, 1.0 equiv) were added. The flask was sealed with a rubber septum and the mixture was stirred under air at 45 °C for 24 h. After cooling to rt, the reaction mixture was diluted with AcOEt and filtered through a Celite pad, washing the flask and the pad with more AcOEt (x3). The filtrate was concentrated under reduced pressure (50 °C). The resulting residue was purified by flash column chromatography (AcOEt/hexane 15:85 to 20:80) to afford 21.2 mg (70%) of **3na** as a light-yellow solid. **Rf**: 0.35 (AcOEt/hexane 25:75, garnet in *p*-anisaldehyde). **<sup>1</sup>H NMR** (500 MHz, CDCl<sub>3</sub>) δ: 7.86 – 7.79 (m, 3H), 7.55 – 7.50 (m, 2H), 7.34 – 7.26 (m, 4H), 7.22 (d, *J* = 8.8 Hz, 1H), 7.12 – 7.09 (m, 1H), 6.34 (d, *J* = 16.0 Hz, 1H), 4.92 (s, 1H), 3.58 (s, 3H). **<sup>13</sup>C NMR** (126 MHz, CDCl<sub>3</sub>) δ: 167.1 (CO), 150.6 (COH), 142.1 (CH), 135.4 (C), 135.1 (C), 133.5 (C), 132.8 (CH), 131.1 (CH), 130.4 (CH), 129.4 (CH), 129.1 (C), 128.3 (CH), 127.4 (CH), 126.9 (CH), 124.6 (CH), 123.7 (CH), 119.9 (CH), 118.5 (C), 117.6 (CH), 51.7 (OCH<sub>3</sub>). **HRMS** (APCI+) *m/z* calcd. for C<sub>20</sub>H<sub>17</sub>O<sub>3</sub> [M+H]: 305.1172; found: 305.1173.

Enantioselectivity of the product was determined by chiral HPLC analysis (Chiralpak IB, IPA/hexane 20:80, 1.0 mL/min,  $\lambda=220$  nm).

*Sample with racemic ligand*

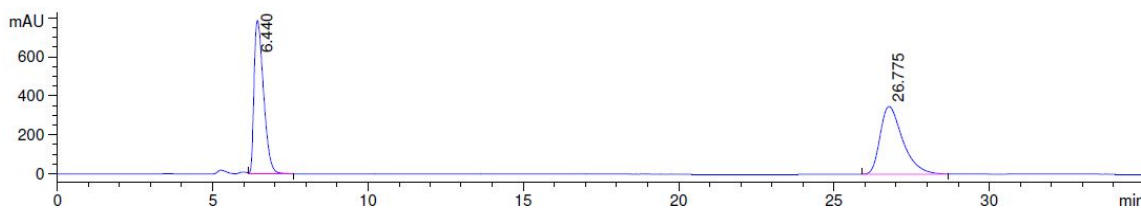

| Peak # | RetTime [min] | Type | Width [min] | Area [mAU*s] | Height [mAU] | Area %  |
|--------|---------------|------|-------------|--------------|--------------|---------|
| 1      | 6.440         | VB   | 0.3319      | 1.67008e4    | 785.94489    | 48.7943 |
| 2      | 26.775        | BB   | 0.7694      | 1.75262e4    | 346.94434    | 51.2057 |

*Sample with chiral ligand*

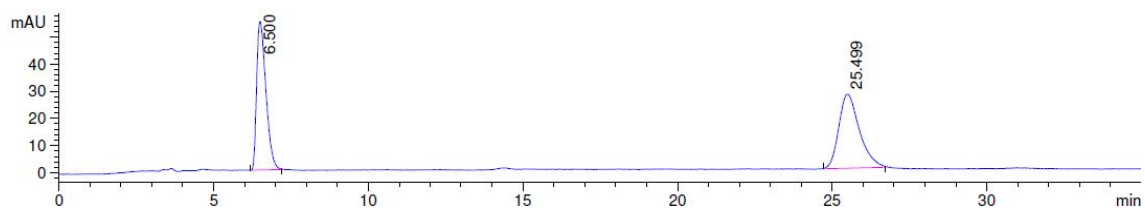

| Peak # | RetTime [min] | Type | Width [min] | Area [mAU*s] | Height [mAU] | Area %  |
|--------|---------------|------|-------------|--------------|--------------|---------|
| 1      | 6.500         | PB   | 0.3187      | 1138.06421   | 54.70285     | 47.4357 |
| 2      | 25.499        | BB   | 0.6876      | 1261.10645   | 27.26560     | 52.5643 |

## 5.2. Attempt of atroposelective alkenylation of 2'-methyl-[1,1'-biphenyl]-2-ol (**1o**)

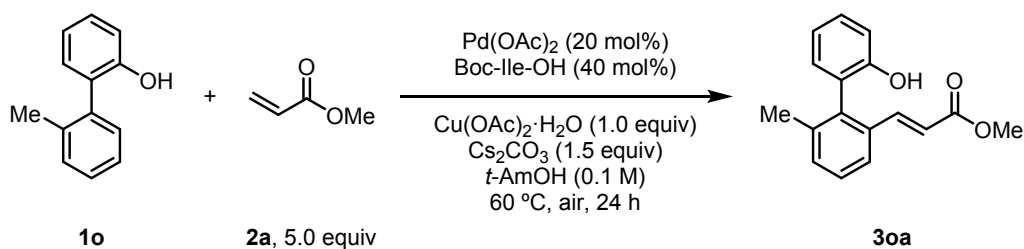

**1o** (18.4 mg, 0.10 mmol, 1.0 equiv), Pd(OAc)<sub>2</sub> (4.5 mg, 20 mol%), Boc-Ile-OH (9.3 mg, 40 mol%), Cu(OAc)<sub>2</sub>·H<sub>2</sub>O (20 mg, 1.0 equiv) and Cs<sub>2</sub>CO<sub>3</sub> (49 mg, 1.5 equiv) were weighed and added into a Schlenk flask under air. Then, *t*-AmOH (1.0 mL, 0.10 M) and methyl acrylate (0.50 mmol, 5.0 equiv) were added. The flask was sealed with a rubber septum and the mixture was stirred under air at 60 °C for 24 h. After cooling to rt, the reaction mixture was diluted with AcOEt and filtered through a Celite pad, washing the flask and the pad with more AcOEt (x3). The filtrate was concentrated under reduced pressure (50 °C). The resulting residue was purified by flash column chromatography (AcOEt/hexane 15:85 to 20:80) to afford 24.3 mg (91%) of **3oa** as a light-yellow solid. **Rf**: 0.35 (AcOEt/hexane 25:75, pink in *p*-anisaldehyde). **<sup>1</sup>H NMR** (500 MHz, CDCl<sub>3</sub>) δ: 7.61 – 7.58 (m, 1H), 7.40 (d, *J* = 16.0 Hz, 1H), 7.39 – 7.33 (m, 2H), 7.32 (ddd, *J* = 8.1, 6.9, 2.1 Hz, 1H), 7.05 – 6.96 (m, 3H), 6.30 (d, *J* = 16.0 Hz, 1H), 4.61 (s, 1H), 3.69 (s, 3H), 2.09 (s, 3H). **<sup>13</sup>C NMR** (126 MHz, CDCl<sub>3</sub>) δ: 167.3 (COH), 152.6 (C), 143.1 (CH), 138.9 (C), 136.6 (C), 134.7 (C), 132.2 (CH), 130.6 (CH), 129.9 (CH), 128.8 (CH), 124.7 (C), 124.6 (CH), 121.1 (CH), 119.5 (CH), 115.9 (CH), 51.8 (OCH<sub>3</sub>), 20.4 (CH<sub>3</sub>). **HRMS** (APCI+) *m/z* calcd. for C<sub>17</sub>H<sub>17</sub>O<sub>3</sub> [M+H]: 269.1172 found: 269.1170.

Enantioselectivity of the product was determined by chiral HPLC analysis (Chiralpak IE3, IPA/hexane 20:80, 0.5 mL/min,  $\lambda=220$  nm).

*Sample with racemic ligand*

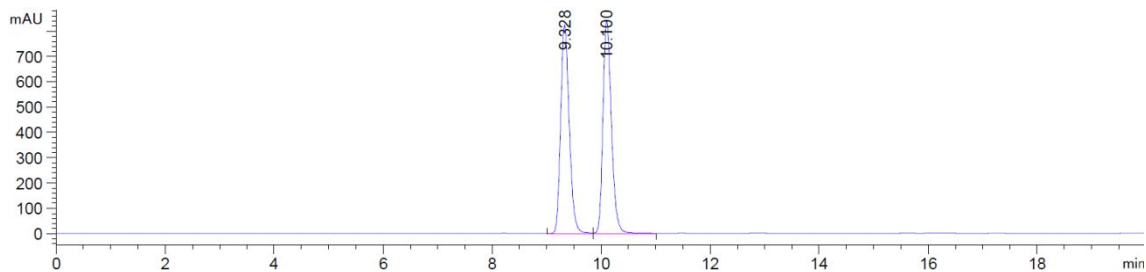

| Peak # | RetTime [min] | Type | Width [min] | Area [mAU*s] | Height [mAU] | Area %  |
|--------|---------------|------|-------------|--------------|--------------|---------|
| 1      | 9.328         | BV   | 0.1677      | 9024.62891   | 824.35577    | 49.8941 |
| 2      | 10.100        | VB   | 0.1655      | 9062.93555   | 842.25098    | 50.1059 |

*Sample with chiral ligand*

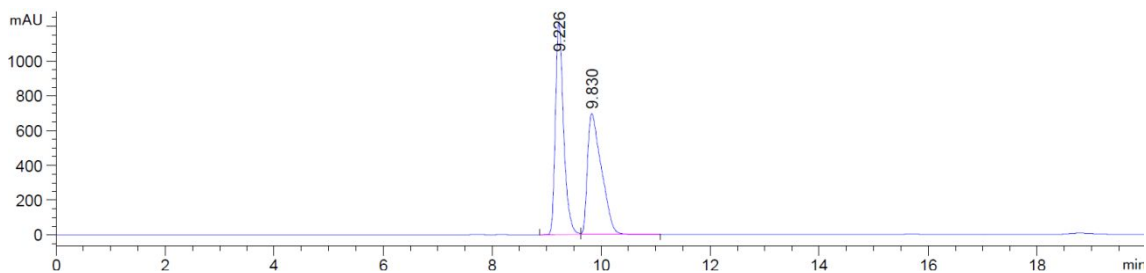

| Peak # | RetTime [min] | Type | Width [min] | Area [mAU*s] | Height [mAU] | Area %  |
|--------|---------------|------|-------------|--------------|--------------|---------|
| 1      | 9.226         | BV   | 0.1580      | 1.27960e4    | 1223.87549   | 50.8122 |
| 2      | 9.830         | VB   | 0.2576      | 1.23869e4    | 695.99994    | 49.1878 |

### 5.3. Dynamic kinetic resolution of 1-(2-methoxyphenyl)naphthalen-2-ol (*rac*-1p) through Pd(II)-catalyzed C-H alkenylation

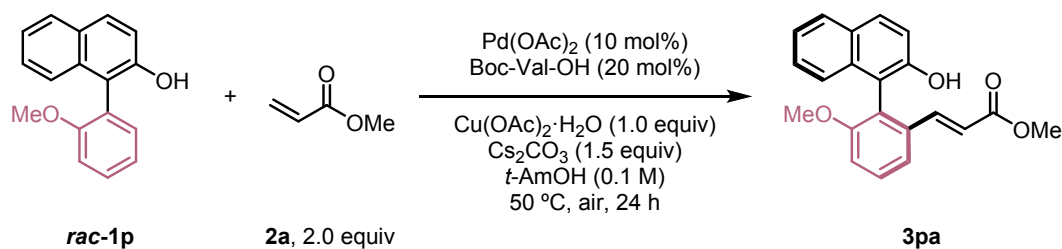

*rac*-1p (25 mg, 0.10 mmol, 1.0 equiv), Pd(OAc)<sub>2</sub> (1.1 mg, 5 mol%), Boc-Val-OH (2.3 mg, 10 mol%), Cu(OAc)<sub>2</sub>·H<sub>2</sub>O (20 mg, 1.0 equiv) and Cs<sub>2</sub>CO<sub>3</sub> (49 mg, 1.5 equiv) were weighed and added into a Schlenk flask under air. Then, *t*-AmOH (1.0 mL, 0.10 M) and methyl acrylate (0.20 mmol, 2.0 equiv) were added. The flask was sealed with a rubber septum and the mixture was stirred under air at 50 °C for 24 h. After cooling to rt, the reaction mixture was diluted with AcOEt and filtered through a Celite pad, washing the flask and the pad with more AcOEt (x3). The filtrate was concentrated under reduced pressure (50 °C). The resulting residue was purified by flash column chromatography (AcOEt/hexane 25:75) to afford 20 mg (60%, 94.5:5.5 er) of 3pa as a white solid. **Rf**: 0.20 (AcOEt/hexane 25:75, blue in *p*-anisaldehyde). **<sup>1</sup>H NMR** (500 MHz, CDCl<sub>3</sub>) δ: 7.85 (d, *J* = 8.9 Hz, 1H), 7.82 (dd, *J* = 7.1, 2.4 Hz, 1H), 7.53 (t, *J* = 8 Hz, 1H), 7.47 (d, *J* = 7.8 Hz, 1H), 7.30 (dtd, *J* = 8.1, 6.0, 1.7 Hz, 2H), 7.26 (d, *J* = 9.0 Hz, 1H), 7.17 (d, *J* = 15.9 Hz, 1H), 7.12 (d, *J* = 8.2 Hz, 1H), 7.09 – 7.05 (m, 1H), 6.33 (d, *J* = 16.0 Hz, 1H), 4.85 (s, 1H), 3.67 (s, 3H), 3.59 (s, 3H). **<sup>13</sup>C NMR** (126 MHz, CDCl<sub>3</sub>) δ: 167.0 (CO), 158.8 (COH), 150.9 (C), 142.2 (CH), 137.0 (C), 133.6 (C), 130.4 (CH), 130.4 (CH), 129.2 (C), 128.3 (CH), 126.7 (CH), 124.4 (CH), 123.5 (CH), 123.3 (C), 120.4 (CH), 119.4 (CH), 117.6 (CH), 114.6 (C), 112.9 (CH), 56.2 (OCH<sub>3</sub>), 51.7 (OCH<sub>3</sub>). **HRMS** (APCI+) *m/z* calcd. for C<sub>21</sub>H<sub>18</sub>O<sub>4</sub> [M+H]: 335.1278; found: 335.1281.

Enantioselectivity of the product was determined by chiral HPLC analysis (Chiralpak IE3, IPA/hexane 20:80, 0.5 mL/min,  $\lambda=300$  nm).

**Racemic Sample**

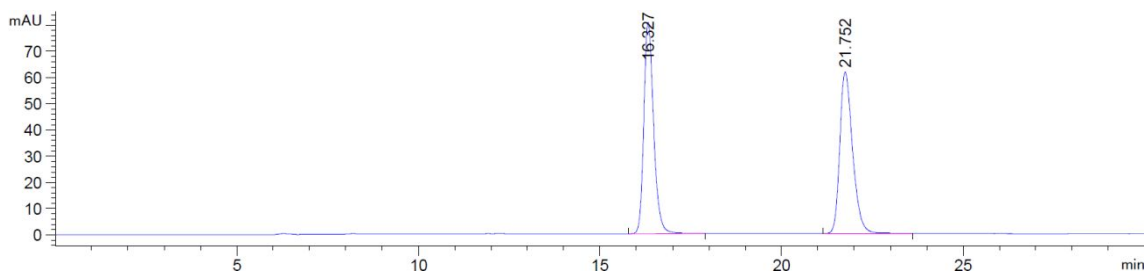

| Peak # | RetTime [min] | Type | Width [min] | Area [mAU*s] | Height [mAU] | Area %  |
|--------|---------------|------|-------------|--------------|--------------|---------|
| 1      | 16.327        | BB   | 0.2861      | 1508.23328   | 80.67456     | 49.9048 |
| 2      | 21.752        | BB   | 0.3747      | 1513.98755   | 61.61275     | 50.0952 |

**Chiral sample**

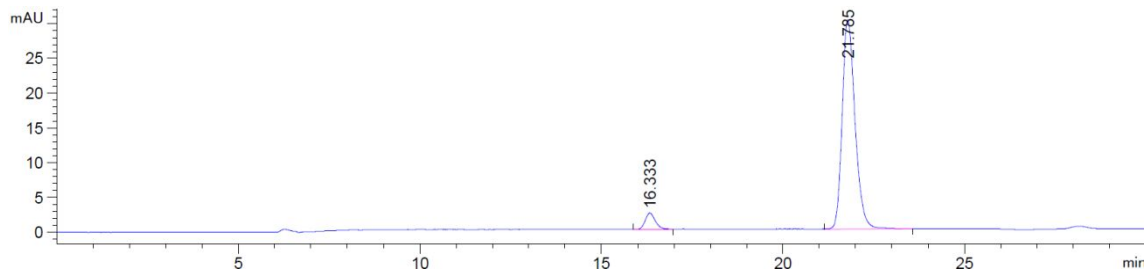

| Peak # | RetTime [min] | Type | Width [min] | Area [mAU*s] | Height [mAU] | Area %  |
|--------|---------------|------|-------------|--------------|--------------|---------|
| 1      | 16.333        | BB   | 0.2879      | 44.75937     | 2.35355      | 5.6968  |
| 2      | 21.785        | BB   | 0.3770      | 740.93549    | 30.12297     | 94.3032 |

## 6. Synthetic applications of the enantioenriched biaryls

### 6.1. Triflation

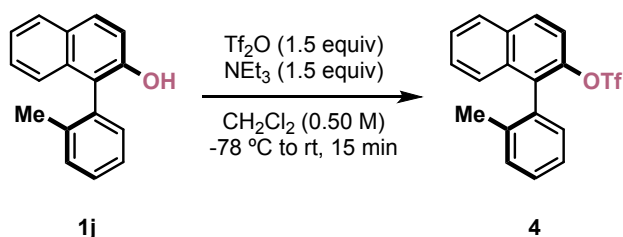

To a solution of **1j** (0.234 g, 1.00 mmol, 1.00 equiv, 96.4:3.6 er) and NEt<sub>3</sub> (0.21 mL, 1.50 mmol, 1.50 equiv) in CH<sub>2</sub>Cl<sub>2</sub> (2.0 mL) at -78 °C, Tf<sub>2</sub>O (0.25 mL, 1.50 mmol, 1.50 equiv) was dropwise added under argon and the resulting garnet solution was warmed to rt and stirred for 15 min. The reaction was quenched with 1.0 M HCl, and the mixture was partitioned between CH<sub>2</sub>Cl<sub>2</sub> and water. The layers were separated, and the aqueous phase was extracted with CH<sub>2</sub>Cl<sub>2</sub> (x2). The combined organic phase was dried over Na<sub>2</sub>SO<sub>4</sub> and concentrated under reduced pressure. The resulting residue was purified by flash column chromatography (AcOEt/hexane 2:98) to afford 0.320 g (87%) of **4** as a colorless oil. **Rf**: 0.65 (AcOEt/hexane 10:90, colorless in *p*-anisaldehyde). **<sup>1</sup>H NMR** (300 MHz, CDCl<sub>3</sub>) δ: 7.96 (dd, *J* = 8.6, 5.2 Hz, 2H), 7.57 (ddd, *J* = 8.1, 5.3, 2.9 Hz, 1H), 7.52 – 7.45 (m, 3H), 7.44 – 7.30 (m, 3H), 7.25 (d, *J* = 6.2 Hz, 1H), 2.01 (s, 3H). **<sup>13</sup>C NMR** (75 MHz, CDCl<sub>3</sub>) δ: 144.3 (C), 137.6 (C), 133.3 (C), 132.7 (C), 132.6 (C), 132.2 (C), 131.1 (CH), 130.4 (CH), 130.1 (CH), 129.0 (CH), 128.3 (CH), 127.7 (CH), 127.1 (CH), 126.8 (CH), 125.9 (CH), 119.6 (CH), 118.5 (d, *J* = 319 Hz, CF<sub>3</sub>), 19.8 (CH<sub>3</sub>). **<sup>19</sup>F NMR** (282 MHz, CDCl<sub>3</sub>) δ: -74.5. **HRMS** (APCI+) *m/z* calcd. for C<sub>18</sub>H<sub>14</sub>F<sub>3</sub>O<sub>3</sub>S [M+H]: 366.0532; found: 366.0525.

## 6.2. C-P cross coupling

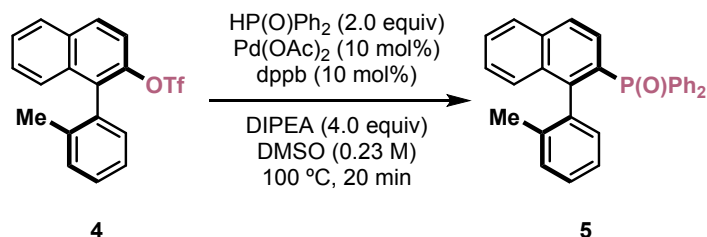

Following a literature procedure<sup>10</sup>, to a solution of **4** (110 mg, 0.30 mmol, 1.0 equiv), HP(O)Ph<sub>2</sub> (121 mg, 0.60 mmol, 2.0 equiv), Pd(OAc)<sub>2</sub> (6.7 mg, 10 mol%) and dppb (12.8 mg, 10 mol%) in DMSO (1.3 mL) was added DIPEA (0.21 mL, 1.2 mmol, 4.0 equiv) and the mixture was stirred at 100 °C under argon for 20 min. After cooling to rt, the reaction mixture was diluted with a high excess of water and extracted with AcOEt (x3). The combined organic phase was washed with water, dried over Na<sub>2</sub>SO<sub>4</sub>, and concentrated under reduced pressure. The resulting residue was purified by flash column chromatography (AcOEt/hexane 60:40) to afford 98.4 mg (78%, 96.5:3.5 er) of **5** as cream foamy solid. **Rf**: 0.30 (AcOEt/hexane 1:1, white in *p*-anisaldehyde). **<sup>1</sup>H NMR** (500 MHz, CDCl<sub>3</sub>) δ: 7.92 – 7.85 (m, 2H), 7.73 (dd, *J* = 11.7, 8.6 Hz, 1H), 7.63 – 7.53 (m, 3H), 7.53 – 7.48 (m, 2H), 7.46 – 7.40 (m, 2H), 7.38 – 7.33 (m, 3H), 7.30 (td, *J* = 7.7, 3.1 Hz, 2H), 7.23 (d, *J* = 8.6 Hz, 1H), 7.12 (td, *J* = 7.5, 1.5 Hz, 1H), 6.95 – 6.88 (m, 2H), 6.84 (dd, *J* = 7.5, 1.5 Hz, 1H), 1.66 (s, 3H). **<sup>13</sup>C NMR** (126 MHz, CDCl<sub>3</sub>) δ: 146.0 (d, *J* = 9.0 Hz, C), 138.0 (C), 136.5 (d, *J* = 4.9 Hz, C), 134.9 (d, *J* = 2.3 Hz, C), 134.0 (d, *J* = 25.2 Hz, C), 133.1 (d, *J* = 25.5, C), 132.9 (d, *J* = 11.7 Hz, C), 132.0 (d, *J* = 9.4 Hz, 2CH), 131.8 (d, *J* = 9.6 Hz, 2CH), 131.4 (d, *J* = 2.8 Hz, CH), 131.2 (CH), 131.2 (2CH), 129.5 (CH), 129.0 (C), 128.7 (d, *J* = 12.1 Hz, CH), 128.3 (d, *J* = 11.9 Hz, 2CH), 128.2 (d, *J* = 12.3 Hz, 2CH), 128.1 (d, *J* = 14.5 Hz, 2CH), 127.3 (d, *J* = 12.3 Hz, CH), 127.0 (d, *J* = 4.9 Hz, 2CH), 124.7 (CH), 20.4 (CH<sub>3</sub>). **<sup>31</sup>P NMR** (202 MHz, CDCl<sub>3</sub>) δ: 27.4. **HRMS** (APCI+) *m/z* calcd. for C<sub>29</sub>H<sub>24</sub>OP [M+H]: 419.1559; found: 419.1562.

<sup>10</sup> Uozumi, Y.; Suzuki, N.; Ogiwara, A.; Hayashi, T. *Tetrahedron* **1994**, *50*, 4293-4302.



Enantioselectivity of the product was determined by chiral HPLC analysis (Chiralpak IG3, IPA/hexane 20:80, 0.5 mL/min,  $\lambda=220$  nm).

*Racemic sample*

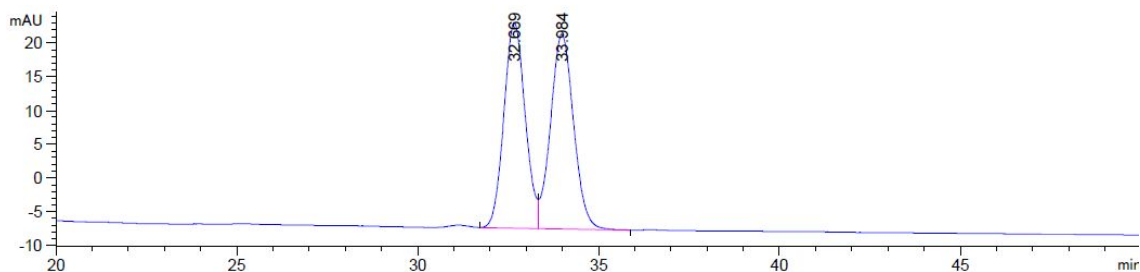

| Peak # | RetTime [min] | Type | Width [min] | Area [mAU*s] | Height [mAU] | Area %  |
|--------|---------------|------|-------------|--------------|--------------|---------|
| 1      | 32.669        | BV   | 0.6323      | 1244.96399   | 30.49198     | 49.2487 |
| 2      | 33.984        | VB   | 0.6878      | 1282.94836   | 28.90899     | 50.7513 |

*Chiral sample*

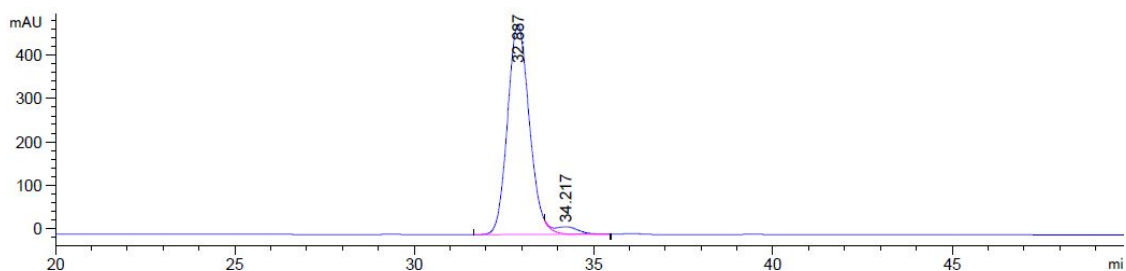

| Peak # | RetTime [min] | Type | Width [min] | Area [mAU*s] | Height [mAU] | Area %  |
|--------|---------------|------|-------------|--------------|--------------|---------|
| 1      | 32.887        | BV R | 0.6591      | 2.05135e4    | 483.41119    | 96.7231 |
| 2      | 34.217        | VB E | 0.6374      | 694.98767    | 16.17125     | 3.2769  |

### 6.3. Phosphine oxide reduction

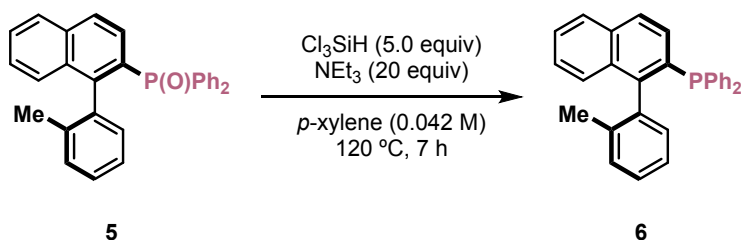

Following a literature procedure<sup>11</sup>, to a solution of **5** (130 mg, 0.331 mmol, 1.0 equiv, 96.5:3.5 er) and NEt<sub>3</sub> (0.86 mL, 6.21 mmol, 20 equiv) in *p*-xylene (7.8 mL) under N<sub>2</sub> atmosphere, Cl<sub>3</sub>SiH (157 μL, 1.55 mmol, 5.0 equiv) was added dropwise and the mixture was stirred at 120 °C for 7 h. After cooling to rt, the reaction was quenched with sat. aq. NaHCO<sub>3</sub>. The mixture was filtered through Celite, and the solids were washed with Et<sub>2</sub>O. The filtrate was dried over MgSO<sub>4</sub> and concentrated under reduced pressure. The resulting residue was purified by flash column chromatography (AcOEt/hexane 5:95) to afford 93.7 mg (75%, 97.5:2.5 er) of **6** as a white solid. **Rf**: 0.77 (AcOEt/hexane 25:75, blue in ceric ammonium molybdate). **<sup>1</sup>H NMR** (500 MHz, CDCl<sub>3</sub>) δ: 7.81 (d, *J* = 8.2 Hz, 1H), 7.73 (d, *J* = 8.5 Hz, 1H), 7.44 (ddd, *J* = 8.1, 6.6, 1.5 Hz, 1H), 7.33 – 7.14 (m, 15H), 7.06 (td, *J* = 6.9, 2.5 Hz, 1H), 6.82 (d, *J* = 7.1 Hz, 1H), 1.88 (s, 3H). **<sup>13</sup>C NMR** (126 MHz, CDCl<sub>3</sub>) δ: 146.6 (d, *J* = 33.1 Hz, C), 139.1 (d, *J* = 8.6 Hz, C), 138.1 (d, *J* = 13.1 Hz, C), 137.7 (d, *J* = 12.3 Hz, C), 136.9 (d, *J* = 1.6 Hz, C), 133.9 (d, *J* = 11.3 Hz, 2CH), 133.8 (d, *J* = 10.5 Hz, C), 133.8 (d, *J* = 11.6 Hz, 2CH), 133.7 (C), 132.5 (d, *J* = 6.9 Hz, C), 131.3 (d, *J* = 3.3 Hz, CH), 130.0 (d, *J* = 1.6 Hz, CH), 129.9 (CH), 128.5 (d, *J* = 6.2 Hz, 2CH), 128.5 (d, *J* = 2.8 Hz, 2CH), 128.4 (d, *J* = 6.6 Hz, 2CH), 128.1 (d, *J* = 3.8 Hz, 2CH), 127.7 (CH), 126.7 (CH), 126.6 (d, *J* = 2.8 Hz, CH), 126.5 (CH), 125.4 (CH), 20.3 (d, *J* = 2.8 Hz, CH<sub>3</sub>). **<sup>31</sup>P NMR** (202 MHz, CDCl<sub>3</sub>) δ -13.5. **HRMS** (APCI+) *m/z* calcd. for C<sub>29</sub>H<sub>24</sub>P [M+H]: 403.1610; found: 403.1614.

<sup>11</sup> Uozumi, Y.; Tanahashi, A.; Lee, S. Y.; Hayashi, T. *J. Org. Chem.* **1993**, *58*, 1945-1948.

Enantioselectivity of the product was determined by chiral HPLC analysis (Chiralpak IG3, IPA/hexane 15:85, 0.5 mL/min,  $\lambda=210$  nm).

*Racemic sample*

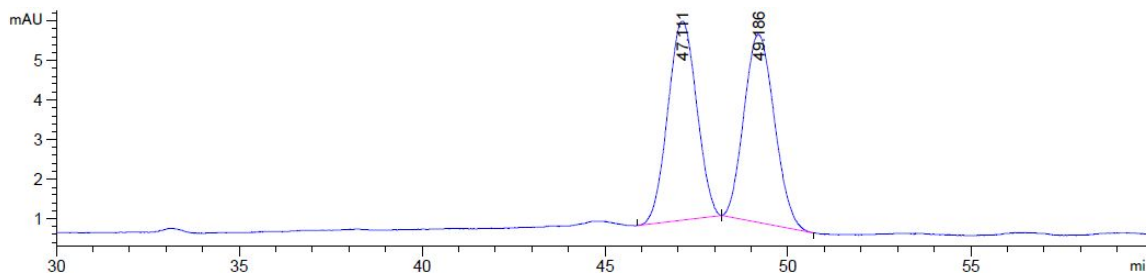

| Peak # | RetTime [min] | Type | Width [min] | Area [mAU*s] | Height [mAU] | Area %  |
|--------|---------------|------|-------------|--------------|--------------|---------|
| 1      | 47.112        | BB   | 0.8563      | 1823.21021   | 33.32220     | 50.1572 |
| 2      | 49.190        | BB   | 0.9002      | 1811.78040   | 31.35147     | 49.8428 |

*Chiral sample*

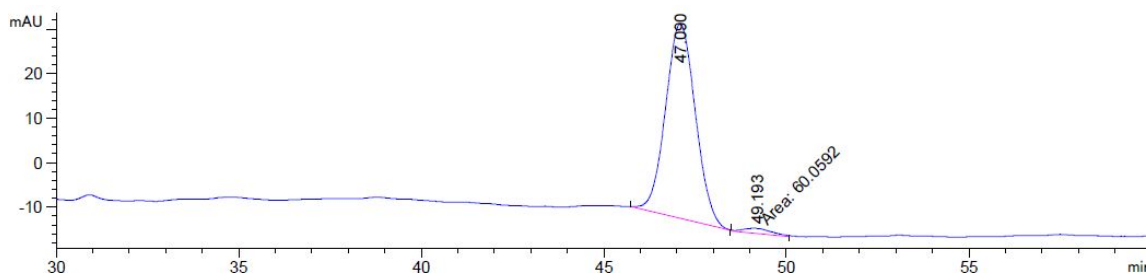

| Peak # | RetTime [min] | Type | Width [min] | Area [mAU*s] | Height [mAU] | Area %  |
|--------|---------------|------|-------------|--------------|--------------|---------|
| 1      | 47.090        | BB   | 0.8796      | 2484.64941   | 43.67977     | 97.6398 |
| 2      | 49.193        | MM   | 0.8898      | 60.05915     | 1.12494      | 2.3602  |

#### 6.4. Methylation and oxidative cleavage

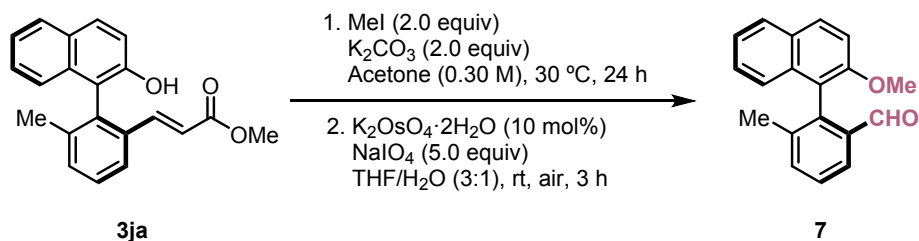

To a suspension of **3ja** (318 mg, 1.00 mmol, 1.00 equiv, 99.9:0.1 er) and K<sub>2</sub>CO<sub>3</sub> (276 mg, 2.00 mmol, 2.00 equiv) in acetone (3.3 mL), MeI (125 μL, 2.00 mmol, 2.00 equiv) was added and the mixture was stirred at 30 °C under argon for 23 h. The reaction mixture was partitioned between AcOEt and water. The layers were separated, and the aqueous phase was extracted with AcOEt (x2). The combined organic phase was dried over Na<sub>2</sub>SO<sub>4</sub> and concentrated under reduced pressure. The resulting residue was purified by flash column chromatography (AcOEt/hexane 10:90) to afford 256 mg (77%) of the methyl ether as a white solid. **Rf**: 0.55 (AcOEt/hexane 20:80, dark brown in *p*-anisaldehyde). **<sup>1</sup>H NMR** (300 MHz, CDCl<sub>3</sub>) δ: 7.94 (d, *J* = 9.2 Hz, 1H), 7.88 – 7.81 (m, 1H), 7.68 – 7.62 (m, 1H), 7.42 – 7.36 (m, 3H), 7.31 (td, *J* = 7.4, 1.5 Hz, 2H), 7.20 (d, *J* = 16.0 Hz, 1H), 7.08 – 7.01 (m, 1H), 6.29 (d, *J* = 15.9 Hz, 1H), 3.82 (s, 3H), 3.59 (s, 3H), 1.88 (s, 3H).

A solution of the above methylated product (100 mg, 0.30 mmol, 1.0 equiv) in THF (3.0 mL) was dropwise added to a stirred suspension of K<sub>2</sub>OsO<sub>4</sub>·2H<sub>2</sub>O (11.1 mg, 10 mol%) and NaIO<sub>4</sub> (321 mg, 1.5 mmol, 5.0 equiv) in water (1.5 mL) and the resulting suspension was stirred under air at rt for 3 h. The reaction was quenched with Na<sub>2</sub>S<sub>2</sub>O<sub>3</sub>, and the mixture was partitioned between AcOEt and water. The layers were separated, and the aqueous phase was extracted with AcOEt. The combined organic phase was dried over Na<sub>2</sub>SO<sub>4</sub> and concentrated under reduced pressure. The resulting residue was purified by flash column chromatography (AcOEt/hexane 5:95 to 10:90) to afford 49.4 mg (59%, 97:3 er) of **7** as a colorless sticky oil that foams under vacuum. **Rf**: 0.50 (AcOEt/hexane 15:85, intense garnet in *p*-anisaldehyde). **<sup>1</sup>H NMR** (300 MHz, CDCl<sub>3</sub>) δ: 9.47 (s, 1H), 8.01 – 8.94 (m, 2H), 7.90 – 7.83 (m, 1H), 7.62 (d, *J* = 7.4 Hz, 1H), 7.49 (t, *J* = 7.6 Hz, 1H), 7.40 (d, *J* = 9.2 Hz, 1H), 7.38 – 7.29 (m, 2H), 7.12 – 7.05 (m, 1H), 3.84 (s, 3H), 1.96 (s, 3H). **<sup>13</sup>C NMR** (75 MHz, CDCl<sub>3</sub>) δ: 193.2 (CHO), 154.3 (COMe), 140.4 (C), 139.0 (C), 135.8 (CH), 135.2 (C), 133.7 (C), 130.3 (CH), 129.0 (C), 128.3 (CH), 128.0 (CH), 127.3 (CH), 124.8 (CH), 124.5 (CH), 124.0 (CH), 118.7 (C), 112.9 (CH), 56.4 (OCH<sub>3</sub>), 19.5 (CH<sub>3</sub>). **HRMS** (APCI+) *m/z* calcd. for C<sub>19</sub>H<sub>17</sub>O<sub>2</sub> [M+H]: 277.1223; found: 277.1229.

Enantioselectivity of the product was determined by chiral HPLC analysis (Chiralpak IE3, IPA/hexane 1:99, 1.0 mL/min,  $\lambda=220$  nm).

*Racemic sample*

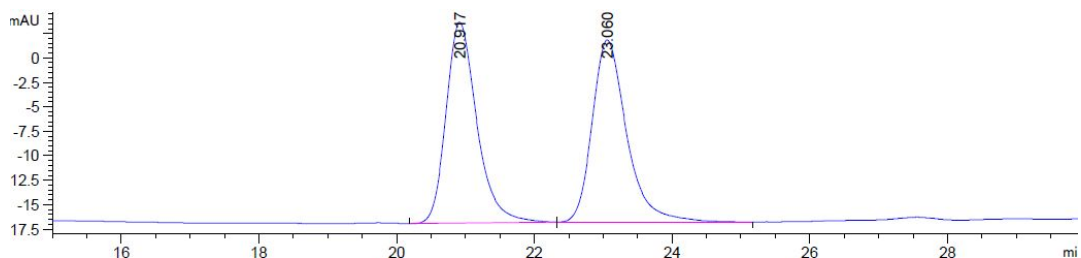

| Peak # | RetTime [min] | Type | Width [min] | Area [mAU*s] | Height [mAU] | Area %  |
|--------|---------------|------|-------------|--------------|--------------|---------|
| 1      | 20.917        | BB   | 0.4724      | 638.13586    | 20.54253     | 49.6506 |
| 2      | 23.060        | BB   | 0.5254      | 647.11621    | 18.62170     | 50.3494 |

*Chiral sample (3 h of reaction time)*

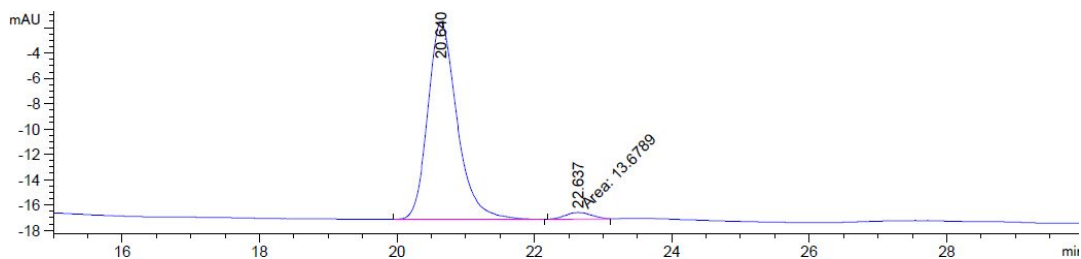

| Peak # | RetTime [min] | Type | Width [min] | Area [mAU*s] | Height [mAU] | Area %  |
|--------|---------------|------|-------------|--------------|--------------|---------|
| 1      | 20.640        | BB   | 0.4495      | 462.95618    | 15.63363     | 97.1301 |
| 2      | 22.637        | MM   | 0.4369      | 13.67886     | 5.21842e-1   | 2.8699  |

*Chiral sample (28 h of reaction time, 0.5 mL/min)*

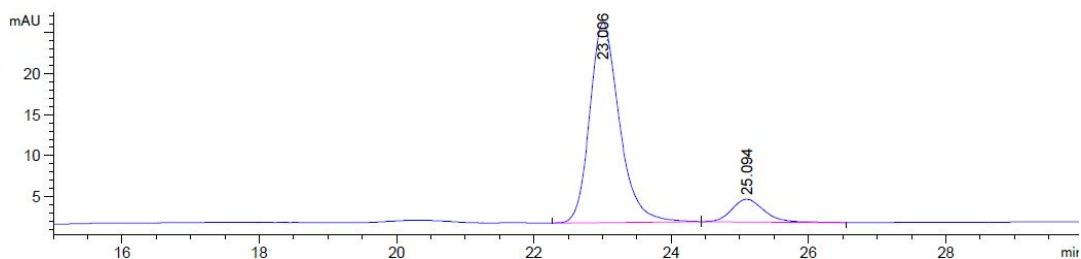

| Peak # | RetTime [min] | Type | Width [min] | Area [mAU*s] | Height [mAU] | Area %  |
|--------|---------------|------|-------------|--------------|--------------|---------|
| 1      | 23.006        | BB   | 0.4551      | 727.27478    | 24.30830     | 89.0391 |
| 2      | 25.094        | BB   | 0.4809      | 89.52942     | 2.75658      | 10.9609 |

*Note:* Aldehyde **7** is not very conformationally stable in solution. After 3 h of reaction time full conversion was observed and there is almost no depletion in the enantiopurity. However, if the reaction is let to stir overnight the enantiopurity decreases significantly.

## 6.5. Oxidation of the aldehyde to the carboxylic acid

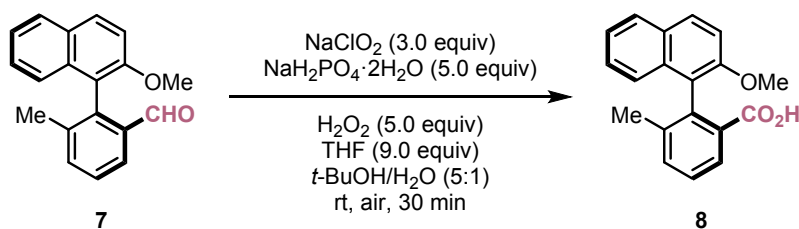

A solution of **7** (44.7 mg, 0.16 mmol, 1.0 equiv), NaClO<sub>2</sub> (80%, 54.9 mg, 0.49 mmol, 3.0 equiv), NaH<sub>2</sub>PO<sub>4</sub>·2H<sub>2</sub>O (126 mg, 0.81 mmol, 5.0 equiv), H<sub>2</sub>O<sub>2</sub> (30%, 83 μL, 0.81 mmol, 5.0 equiv) and THF (0.12 mL, 1.46 mmol, 9.0 equiv) in *t*-BuOH (1.6 mL) and water (0.32 mL) was stirred at rt under air for 30 min. The volatiles were removed under reduced pressure and the aqueous residue was partitioned between water and CH<sub>2</sub>Cl<sub>2</sub>. The layers were separated, and the aqueous phase was extracted with CH<sub>2</sub>Cl<sub>2</sub> (x2). The combined organic phase was dried over Na<sub>2</sub>SO<sub>4</sub>, and concentrated under reduced pressure. The resulting residue was purified by flash column chromatography (AcOH/AcOEt/hexane 1:10:90 to 1:15:85) to afford 38.5 mg (81%, 95:5 er) of **8** as a white solid. **Rf**: 0.33 (AcOH/AcOEt/hexane 1:25:75, red when freshly stained in *p*-anisaldehyde). **<sup>1</sup>H NMR** (300 MHz, CDCl<sub>3</sub>) δ: 9.69 (br s, 1H), 7.96 (d, *J* = 7.8 Hz, 1H), 7.87 (d, *J* = 9.1 Hz, 1H), 7.82 (d, *J* = 7.9 Hz, 1H), 7.54 (d, *J* = 7.5 Hz, 1H), 7.41 (t, *J* = 7.7 Hz, 1H), 7.35 – 7.22 (m, 3H), 7.05 (d, *J* = 8.0 Hz, 1H), 3.75 (s, 3H), 1.90 (s, 3H). **<sup>13</sup>C NMR** (75 MHz, CDCl<sub>3</sub>) δ: 172.4 (CO<sub>2</sub>H), 153.4 (COMe), 139.1 (C), 137.6 (C), 134.5 (CH), 133.0 (C), 130.8 (C), 129.2 (CH), 129.1 (C), 128.8 (CH), 128.1 (CH), 127.5 (CH), 126.6 (CH), 124.2 (CH), 123.5 (CH), 123.0 (C), 113.6 (CH), 56.6 (OCH<sub>3</sub>), 20.2 (CH<sub>3</sub>). **HRMS** (APCI+) *m/z* calcd. for C<sub>19</sub>H<sub>17</sub>O<sub>3</sub> [M+H]: 293.1172; found: 293.1181.

Enantioselectivity of the product was determined by chiral HPLC analysis (Chiralpak IG3, IPA/hexane 10:90, 1.0 mL/min,  $\lambda=210$  nm).

*Racemic sample*

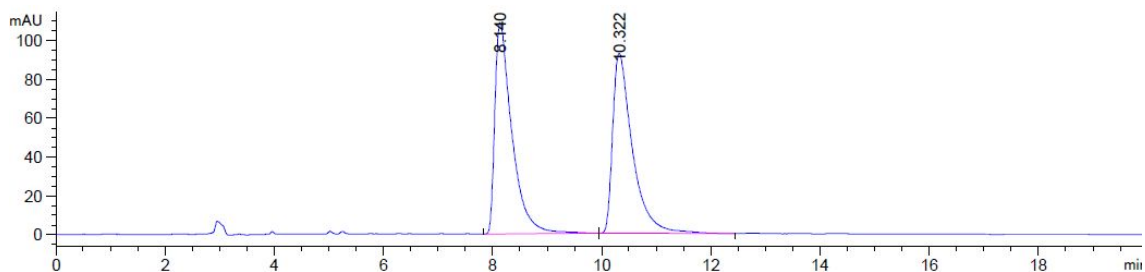

| Peak # | RetTime [min] | Type | Width [min] | Area [mAU*s] | Height [mAU] | Area %  |
|--------|---------------|------|-------------|--------------|--------------|---------|
| 1      | 8.140         | BB   | 0.3166      | 2381.49731   | 109.11007    | 50.3912 |
| 2      | 10.322        | BB   | 0.3726      | 2344.52563   | 92.86121     | 49.6088 |

*Chiral sample*

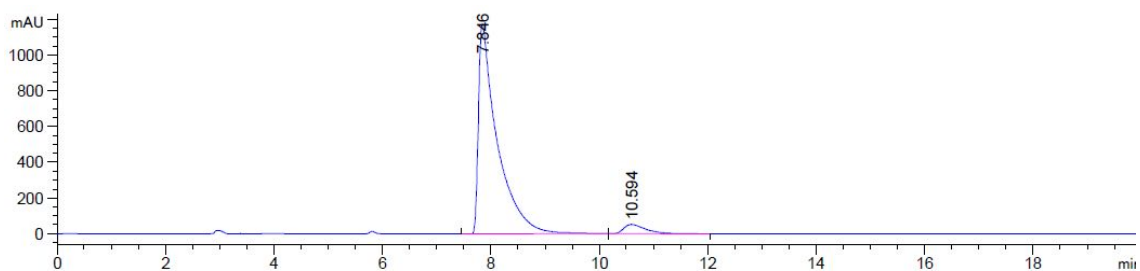

| Peak # | RetTime [min] | Type | Width [min] | Area [mAU*s] | Height [mAU] | Area %  |
|--------|---------------|------|-------------|--------------|--------------|---------|
| 1      | 7.846         | BB   | 0.3269      | 2.82849e4    | 1174.55981   | 95.0714 |
| 2      | 10.594        | BB   | 0.4157      | 1466.30615   | 52.20145     | 4.9286  |

*Notes:* The pure solid carboxylic acid is insoluble in most part of common organic solvents. However, the remaining acetic acid from the chromatographic purification helps to dissolve it in chloroform, so the NMR experiments were recorded previously to drying it and signals of residual dichloromethane and acetic acid can be observed in the spectra. The yield was calculated after solidification and drying under high vacuum.

## 6.6. Reductive amination and hydroxyl deprotection

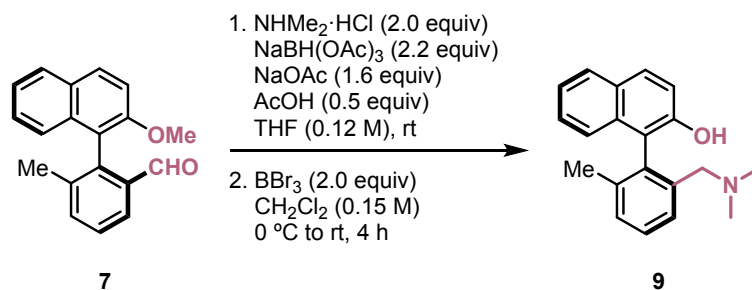

Following a literature procedure<sup>12</sup>, a solution of **7** (30.2 mg, 0.11 mmol, 1.00 equiv, 89:11 er),  $\text{NHMe}_2 \cdot \text{HCl}$  (17.8 mg, 0.22 mmol, 2.00 equiv),  $\text{NaOAc}$  (14.3 mg, 0.18 mmol, 1.60 equiv) and  $\text{AcOH}$  (3  $\mu\text{L}$ , 0.055 mmol, 0.50 equiv) in THF (0.95 mL) under argon was stirred at rt for 10 min.  $\text{NaBH}(\text{OAc})_3$  (51.7 mg, 0.24 mmol, 2.23 equiv) was added and the mixture was stirred at rt for 19 h. The solvent was removed under reduced pressure and the residue was partitioned between  $\text{Et}_2\text{O}$  and water. The biphasic mixture was extracted with 10% aq. citric acid (x3). The combined aqueous phase was washed with  $\text{Et}_2\text{O}$ , basified to pH 8 with solid  $\text{NaHCO}_3$ , and extracted with  $\text{AcOEt}$  (x3). The combined  $\text{AcOEt}$  organic phase was dried over  $\text{Na}_2\text{SO}_4$  and concentrated under reduced pressure to afford a colorless oil that was used without further purification.

A solution of above oil in  $\text{CH}_2\text{Cl}_2$  (0.15 M) under argon was cooled to 0 °C and  $\text{BBr}_3$  (1.0 M in  $\text{CH}_2\text{Cl}_2$ , 2.0 equiv) was dropwise added. The resulting mixture was warmed to rt and stirred for 3 h. The reaction was quenched with sat. aq.  $\text{NaHCO}_3$  and the mixture was partitioned between water and  $\text{CH}_2\text{Cl}_2$ . The layers were separated, and the aqueous phase was extracted with  $\text{CH}_2\text{Cl}_2$  (x2). The combined organic phase was dried over  $\text{Na}_2\text{SO}_4$  and concentrated under reduced pressure. The resulting residue was purified by flash column chromatography ( $\text{NEt}_3/\text{MeOH}/\text{CH}_2\text{Cl}_2$  0:2:98 to 0.5:3:97) to afford 13.7 mg (43%, 2 steps, 88:12 er) of **9** as a white solid. **Rf**: 0.40 ( $\text{MeOH}/\text{CH}_2\text{Cl}_2$  10:90, white in *p*-anisaldehyde). **<sup>1</sup>H NMR** (300 MHz,  $\text{CDCl}_3$ )  $\delta$ : 7.85 – 7.77 (m, 2H), 7.39 – 7.32 (m, 3H), 7.31 – 7.18 (m, 3H), 6.97 (d,  $J$  = 7.6 Hz, 1H), 3.52 (d,  $J$  = 11.7 Hz, 1H), 2.99 (d,  $J$  = 11.8 Hz, 1H), 2.22 (s, 6H), 1.78 (s, 3H). **<sup>13</sup>C NMR** (75 MHz,  $\text{CDCl}_3$ )  $\delta$ : 153.5 (COH), 139.5 (C), 137.3 (C), 136.7 (C), 133.6 (C), 130.6 (CH), 129.4 (CH), 128.4 (CH), 128.1 (CH), 127.2 (CH), 126.2 (CH), 124.4 (CH), 123.5 (C), 123.2 (CH), 122.9 (CH), 63.7 (2NCH<sub>3</sub>), 44.0 (CH<sub>2</sub>), 20.6 (CH<sub>3</sub>). **HRMS** (APCI+)  $m/z$  calcd. for  $\text{C}_{20}\text{H}_{22}\text{NO}$  [ $\text{M}+\text{H}$ ]: 292.1696; found: 292.1670.

<sup>12</sup> Dong, Z.; Wang, J.; Dong, G. *J. Am. Chem. Soc.* **2015**, *137*, 5887-5890.



Enantioselectivity of the product was determined by chiral HPLC analysis (Chiralpak OZ-H, IPA/hexane 15:85, 0.5 mL/min,  $\lambda=220$  nm).

*Racemic sample*

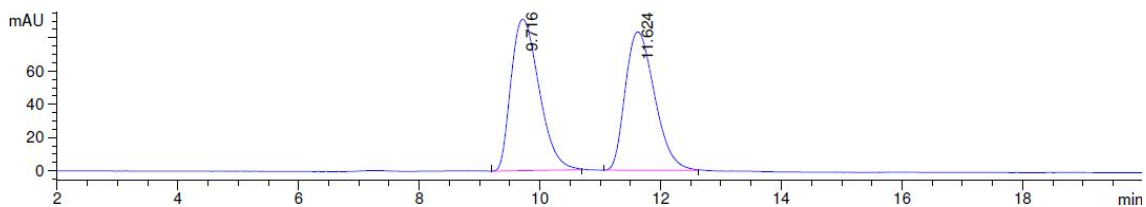

| Peak # | RetTime [min] | Type | Width [min] | Area [mAU*s] | Height [mAU] | Area %  |
|--------|---------------|------|-------------|--------------|--------------|---------|
| 1      | 9.716         | PB   | 0.5155      | 2951.29932   | 91.19952     | 51.1585 |
| 2      | 11.624        | PB   | 0.5305      | 2817.62793   | 83.32009     | 48.8415 |

*Chiral sample*

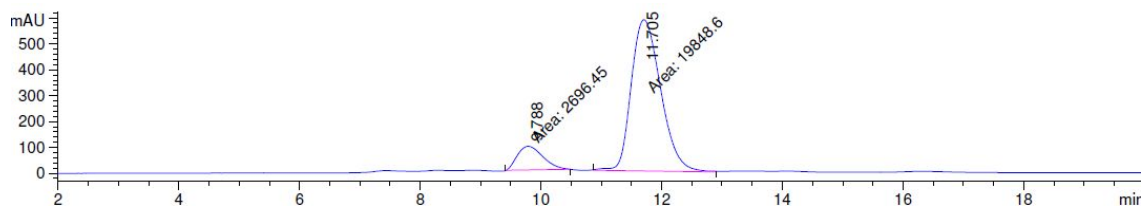

| Peak # | RetTime [min] | Type | Width [min] | Area [mAU*s] | Height [mAU] | Area %  |
|--------|---------------|------|-------------|--------------|--------------|---------|
| 1      | 9.788         | MM   | 0.4936      | 2696.44653   | 91.04956     | 11.9603 |
| 2      | 11.705        | MM   | 0.5666      | 1.98486e4    | 583.86511    | 88.0397 |

## 6.7. Quaternarization of the amine

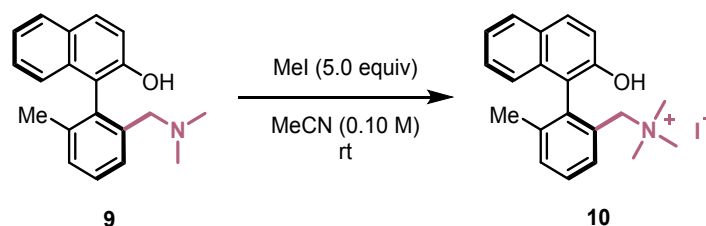

Following a literature procedure<sup>13</sup>, to a solution of **9** (19.6 mg, 0.067 mmol, 1.0 equiv) in MeCN (0.67 mL), MeI (8  $\mu$ L, 0.14 mmol, 2.0 equiv) was added and the mixture was stirred at rt under argon for 21.5 h. More MeI (12  $\mu$ L, 3.0 equiv) was added and the mixture was stirred for another 7 h. The solvent was removed under reduced pressure and the resulting residue was purified by flash column chromatography (MeOH/CH<sub>2</sub>Cl<sub>2</sub> 5:95) to afford 18.4 mg (63%) of **10** as a cream solid. **Rf**: 0.15 (MeOH/CH<sub>2</sub>Cl<sub>2</sub> 10:90, white in *p*-anisaldehyde). **<sup>1</sup>H NMR** (300 MHz, CDCl<sub>3</sub>)  $\delta$ : 7.87 – 7.59 (m, 5H), 7.46 (d, *J* = 7.1 Hz, 1H), 7.39 – 7.28 (m, 3H), 6.97 – 6.86 (m, 1H), 5.32 (s, 1H), 4.46 (d, *J* = 12.8 Hz, 1H), 4.24 (d, *J* = 12.9 Hz, 1H), 2.95 (s, 9H), 1.97 (s, 3H). **<sup>13</sup>C NMR** (75 MHz, CDCl<sub>3</sub>)  $\delta$ : 151.5 (COH), 140.6 (C), 138.8 (C), 133.2 (CH), 132.8 (C), 132.1 (CH), 130.6 (CH), 129.0 (CH), 128.4 (CH), 127.7 (CH), 127.3 (C), 123.8 (CH), 123.2 (CH), 119.3 (CH), 117.1 (C), 67.7 (CH<sub>2</sub>), 53.5 (NCH<sub>3</sub>), 20.8 (CH<sub>3</sub>).

<sup>13</sup> Deng, Y.; Shi, X.; Shi, G.; Lu, X.; Luo, J.; Deng, L. *JACS Au* **2022**, *2*, 2678-2685.

## 6.8. Hydrogenation of the double bond

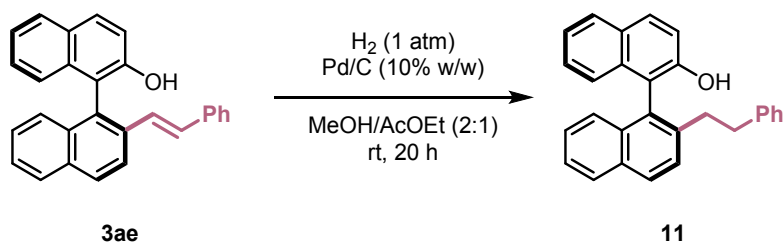

To a solution of **3ae** (153 mg, 0.41 mmol, 1.0 equiv, 93:7 er) in MeOH/AcOEt (2:1, 3.1 mL) under N<sub>2</sub>, Pd/C (10% w/w, 43.6 mg, 10 mol%) was added, and the black suspension was purged with H<sub>2</sub>. After stirring at rt under H<sub>2</sub> atmosphere (balloon) for 20 h, the reaction mixture was filtered through Celite, and the solids were washed with AcOEt. The filtrate was concentrated under reduced pressure and the resulting residue was purified by flash column chromatography (AcOEt/hexane 2:98) to afford 102 mg (67%, 93:7 er) of **11** as white fluffy solid. **Rf**: 0.57 (AcOEt/hexane 20:80, grey in *p*-anisaldehyde). **<sup>1</sup>H NMR** (300 MHz, CDCl<sub>3</sub>) δ: 8.03 – 7.89 (m, 4H), 7.60 (d, *J* = 8.5 Hz, 1H), 7.49 (ddd, *J* = 8.1, 6.4, 1.6 Hz, 1H), 7.39 (d, *J* = 8.9 Hz, 1H), 7.36 – 7.22 (m, 4H), 7.20 – 7.08 (m, 3H), 7.03 (d, *J* = 8.4 Hz, 1H), 6.85 (dt, *J* = 7.6, 1.3 Hz, 2H), 4.75 (s, 1H), 2.83 – 2.67 (m, 4H). **<sup>13</sup>C NMR** (75 MHz, CDCl<sub>3</sub>) δ: 151.1 (COH), 141.6 (C), 141.0 (C), 133.9 (C), 133.5 (C), 132.9 (C), 130.1 (CH), 129.3 (CH), 129.3 (C), 128.9 (C), 128.4 (4CH), 128.3 (2CH), 128.2 (CH), 127.1 (CH), 126.9 (CH), 126.0 (2CH), 125.8 (CH), 124.9 (CH), 123.6 (CH), 117.6 (CH), 117.4 (C), 37.2 (CH<sub>2</sub>), 36.5 (CH<sub>2</sub>). **HRMS** (APCI+) *m/z* calcd. for C<sub>28</sub>H<sub>23</sub>O [M+H]: 375.1743; found: 375.1733.

Enantioselectivity of the product was determined by chiral HPLC analysis (Chiralpak IA3, IPA/hexane 2:98, 1.0 mL/min,  $\lambda=220$  nm).

*Racemic sample*

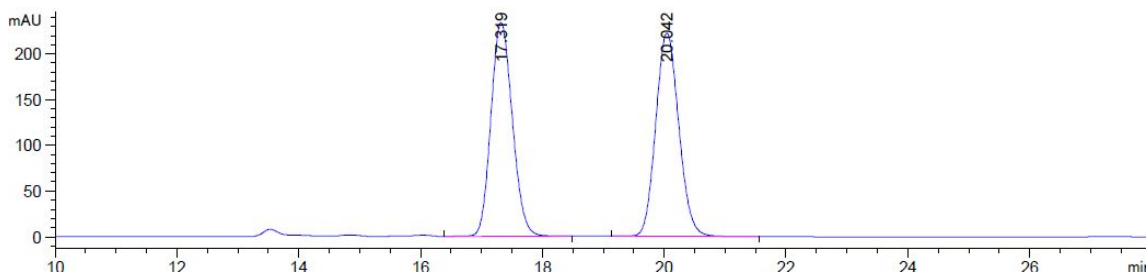

| Peak # | RetTime [min] | Type | Width [min] | Area [mAU*s] | Height [mAU] | Area %  |
|--------|---------------|------|-------------|--------------|--------------|---------|
| 1      | 17.319        | BB   | 0.3832      | 5710.61621   | 233.63649    | 49.4373 |
| 2      | 20.042        | BB   | 0.4127      | 5840.61035   | 222.18661    | 50.5627 |

*Chiral sample*

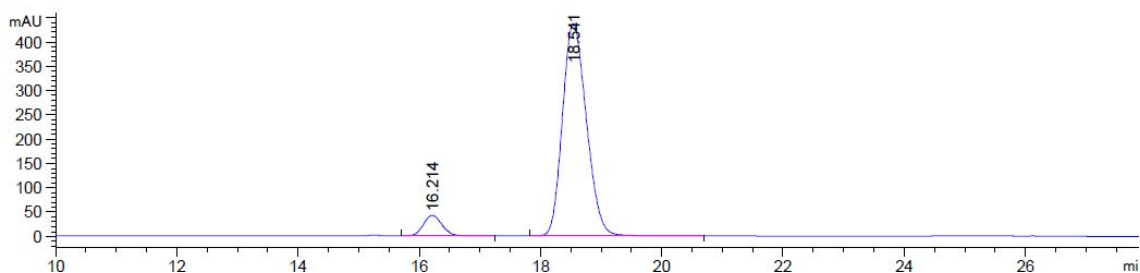

| Peak # | RetTime [min] | Type | Width [min] | Area [mAU*s] | Height [mAU] | Area %  |
|--------|---------------|------|-------------|--------------|--------------|---------|
| 1      | 16.214        | BB   | 0.3308      | 898.57483    | 42.13327     | 6.9737  |
| 2      | 18.541        | BB   | 0.4282      | 1.19866e4    | 436.71841    | 93.0263 |

## 6.9. Amine-alcohol exchange by Smiles rearrangement

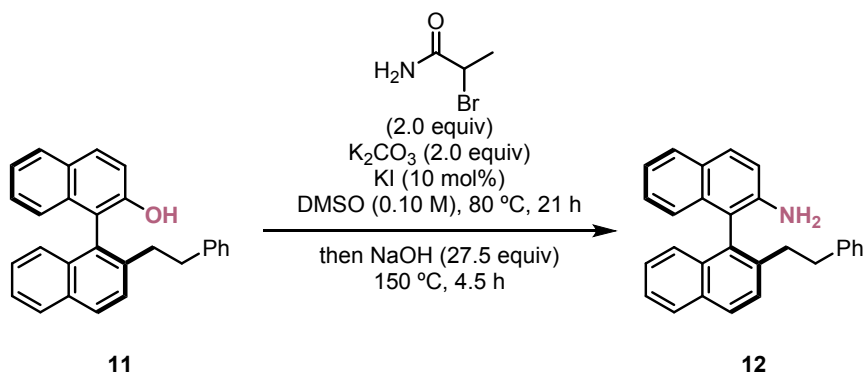

Following a slight modification of a reported procedure<sup>14</sup>, a solution of **11** (47.6 mg, 0.127 mmol, 1.0 equiv, 93:7 er), 2-bromopropionamide (38.6 mg, 0.254 mmol, 2.0 equiv),  $K_2CO_3$  (35.1 mg, 0.254 mmol, 2.0 equiv) and KI (2.1 mg, 10 mol%) in DMSO (1.3 mL) was stirred at 80 °C under argon for 21 h. NaOH (140 mg, 3.50 mmol, 27.5 equiv) was added, and the mixture was stirred at 150 °C for 4.5 h. After cooling to rt, the reaction mixture was partitioned between water and AcOEt. The layers were separated, and the aqueous phase was extracted with AcOEt (x2). The combined organic phase was washed with water and brine, dried over  $Na_2SO_4$ , and concentrated under reduced pressure. The resulting residue was purified by flash column chromatography (AcOEt/hexane 3:97 to 4:96) to afford 27.8 mg (59%, 92.5:7.5 er) of **12** as a white solid. **Rf**: 0.55 (AcOEt/hexane 20:80, yellow in *p*-anisaldehyde). **<sup>1</sup>H NMR** (300 MHz,  $CDCl_3$ )  $\delta$ : 7.99 – 7.92 (m, 2H), 7.89 – 7.82 (m, 2H), 7.61 (d,  $J$  = 8.5 Hz, 1H), 7.48 (ddd,  $J$  = 8.1, 4.8, 3.3 Hz, 1H), 7.33 – 7.12 (m, 8H), 6.97 (d,  $J$  = 8.3 Hz, 1H), 6.89 – 6.83 (m, 2H), 3.45 (s, 2H), 2.86 – 2.74 (m, 4H). **<sup>13</sup>C NMR** (75 MHz,  $CDCl_3$ )  $\delta$ : 142.2 (C), 142.1 (C), 139.8 (C), 134.4 (C), 133.0 (C), 133.0 (C), 132.3 (C), 129.2 (CH), 128.6 (CH), 128.3 (2CH), 128.3 (CH), 128.23 (CH), 128.2 (CH), 128.1 (CH), 126.7 (CH), 126.6 (CH), 126.0 (CH), 125.8 (2CH), 125.6 (CH), 124.4 (CH), 122.4 (CH), 118.2 (CH), 116.0 (C), 37.0 ( $CH_2$ ), 36.4 ( $CH_2$ ). **HRMS** (APCI+)  $m/z$  calcd. for  $C_{28}H_{24}N$  [M+H]: 374.1903; found: 374.1905.

<sup>14</sup> Chang, X.; Zhang, Q.; Guo, C. *Org. Lett.* **2019**, *21*, 4915-4918.

Enantioselectivity of the product was determined by chiral HPLC analysis (Chiralpak IA3, IPA/hexane 2:98, 1.0 mL/min,  $\lambda=220$  nm).

*Racemic sample*

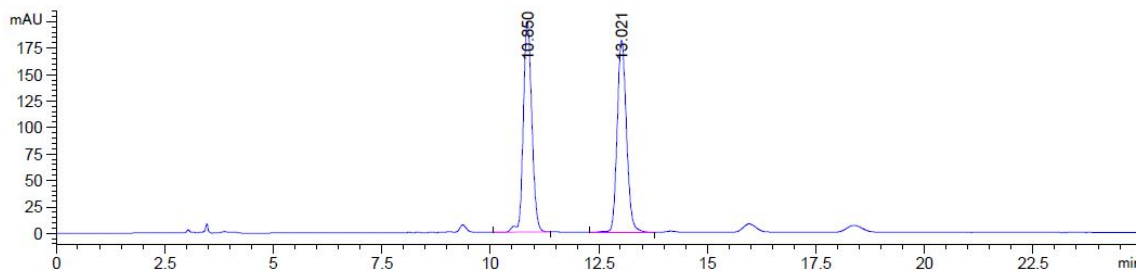

| Peak # | RetTime [min] | Type | Width [min] | Area [mAU*s] | Height [mAU] | Area %  |
|--------|---------------|------|-------------|--------------|--------------|---------|
| 1      | 10.850        | VB R | 0.2108      | 2724.84790   | 199.10034    | 50.1283 |
| 2      | 13.021        | BB   | 0.2302      | 2710.89551   | 181.54243    | 49.8717 |

*Chiral sample*

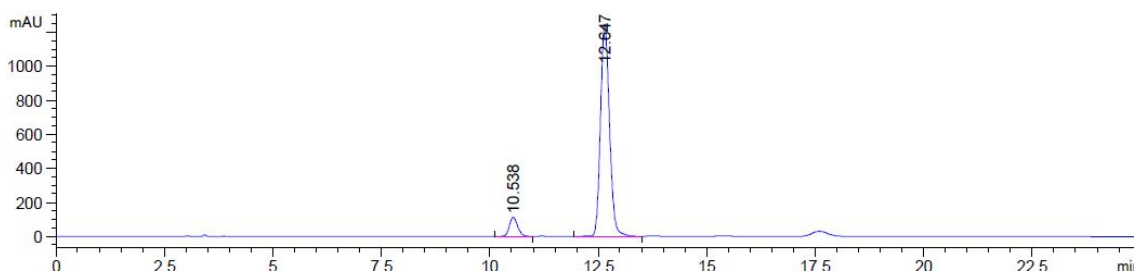

| Peak # | RetTime [min] | Type | Width [min] | Area [mAU*s] | Height [mAU] | Area %  |
|--------|---------------|------|-------------|--------------|--------------|---------|
| 1      | 10.538        | BB   | 0.2036      | 1465.20313   | 111.30727    | 7.5024  |
| 2      | 12.647        | BB   | 0.2253      | 1.80647e4    | 1244.68542   | 92.4976 |

## 7. Mechanistic proposal and stereomodel for the C-H activation step

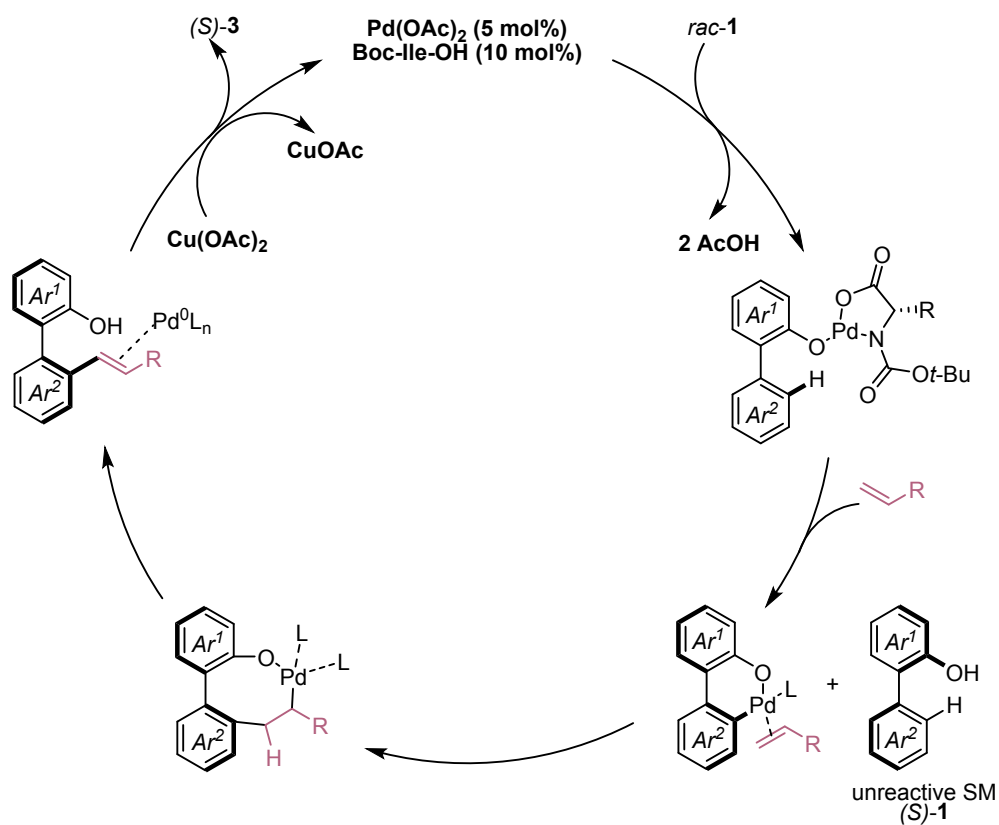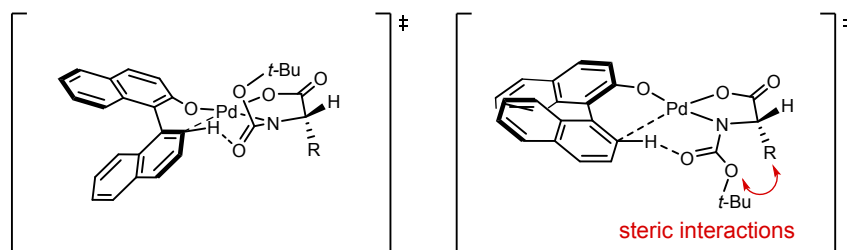

NOTE: Plausible qualitative stereomodel for the C-H activation step

## 8. NMR Spectra

### $^1\text{H}$ NMR (300 MHz, $\text{CDCl}_3$ )

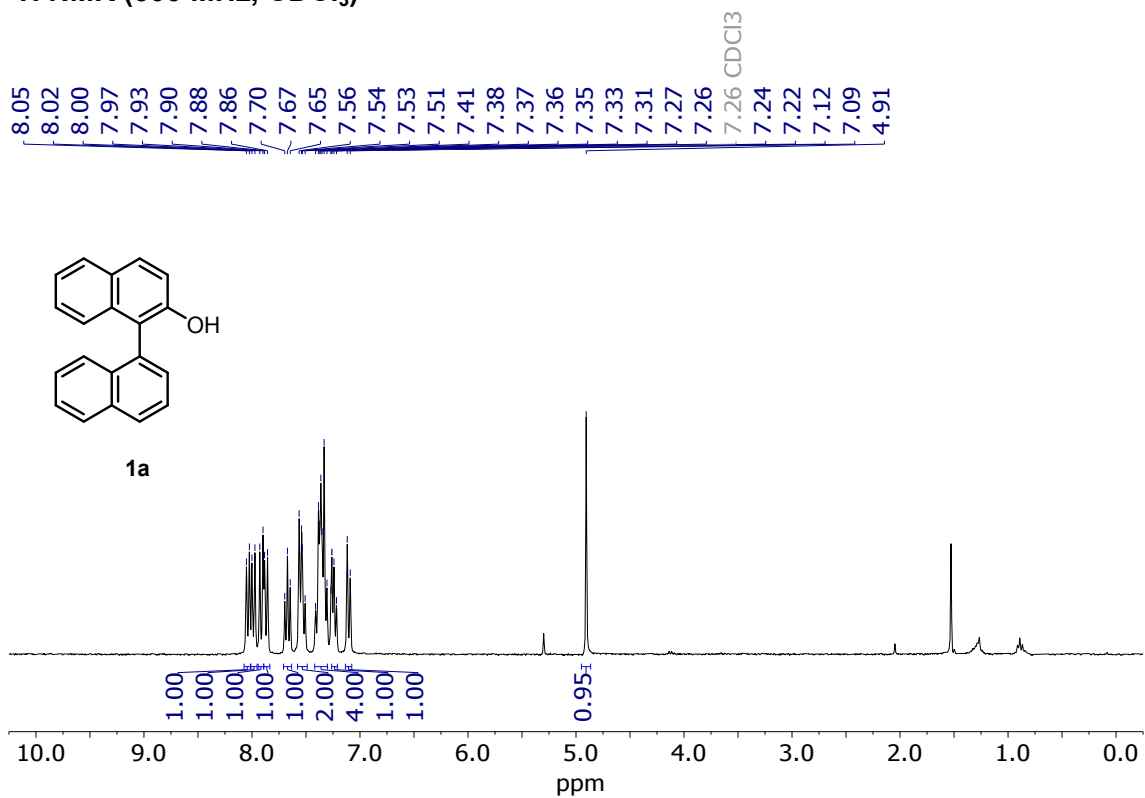

### DEPT-135

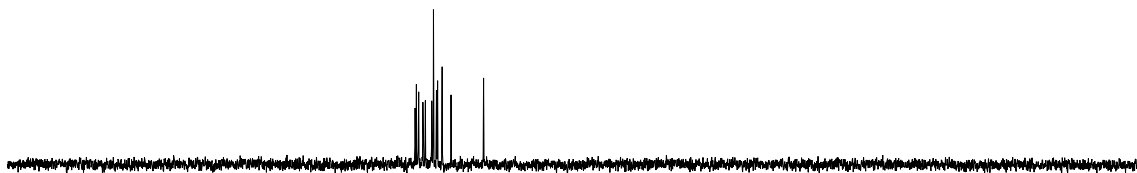

### $^{13}\text{C}$ NMR (75 MHz, $\text{CDCl}_3$ )

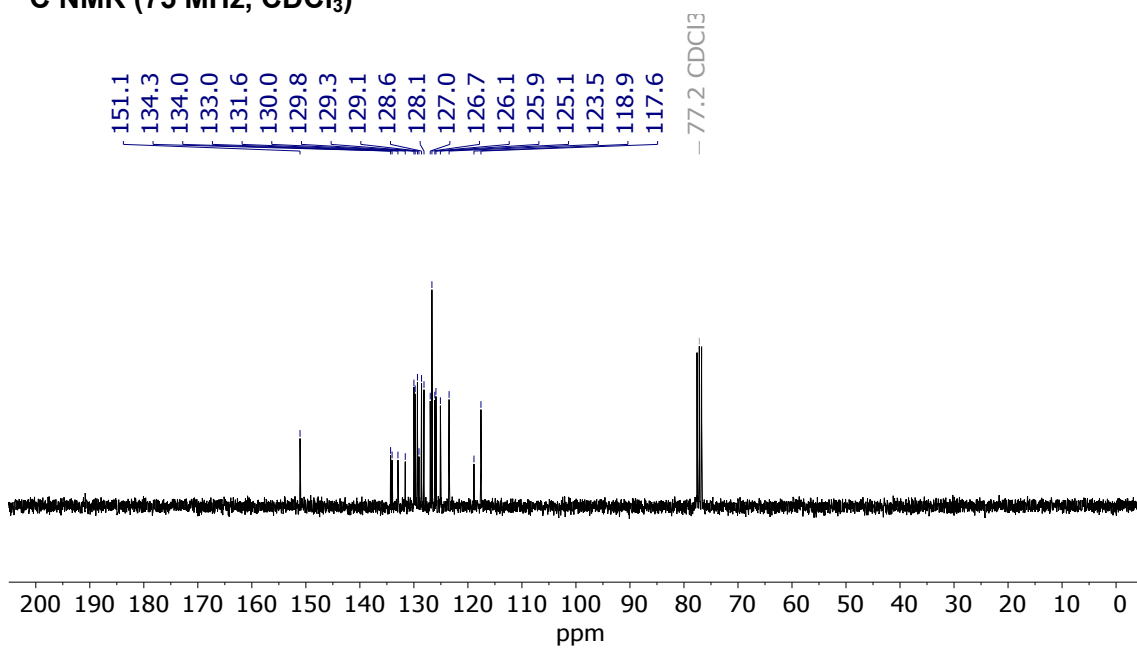



**<sup>1</sup>H NMR (300 MHz, CDCl<sub>3</sub>)**

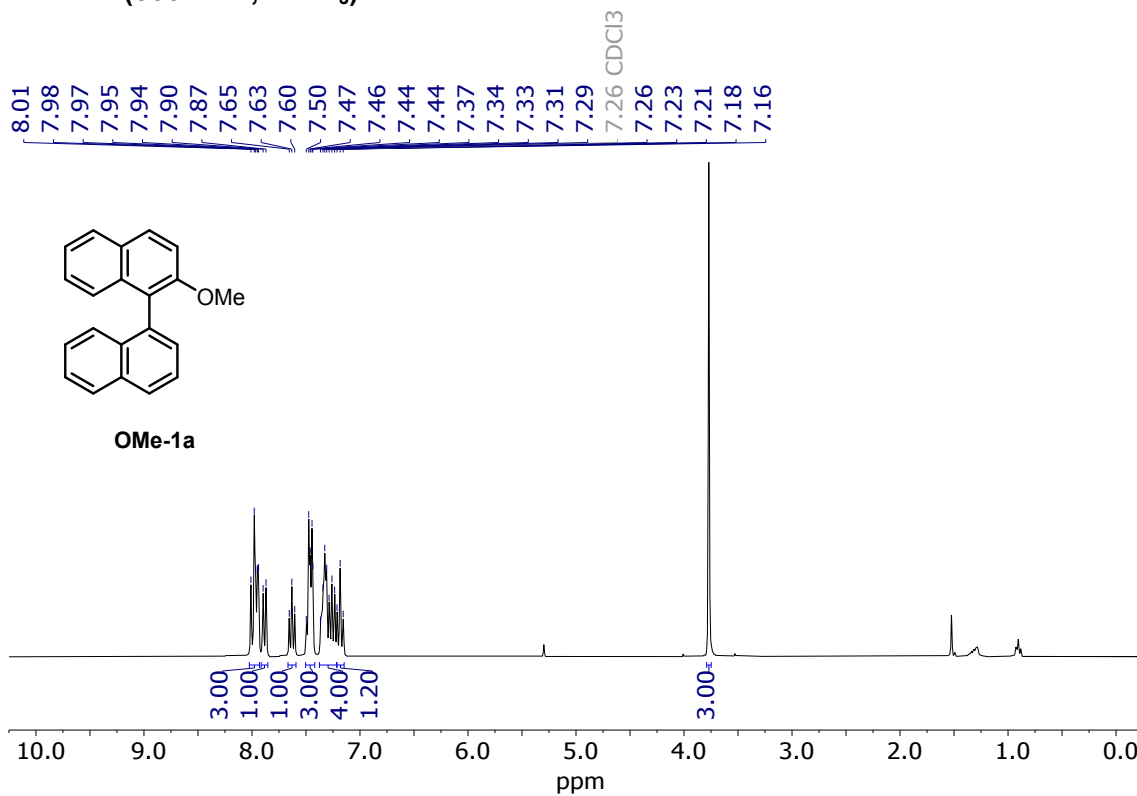

**DEPT-135**

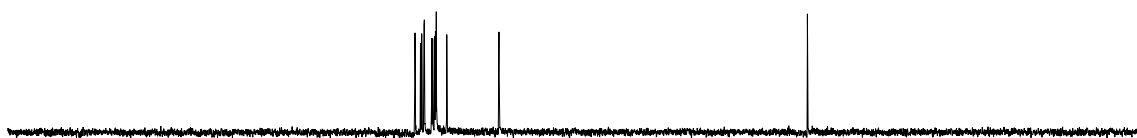

**<sup>13</sup>C NMR (75 MHz, CDCl<sub>3</sub>)**

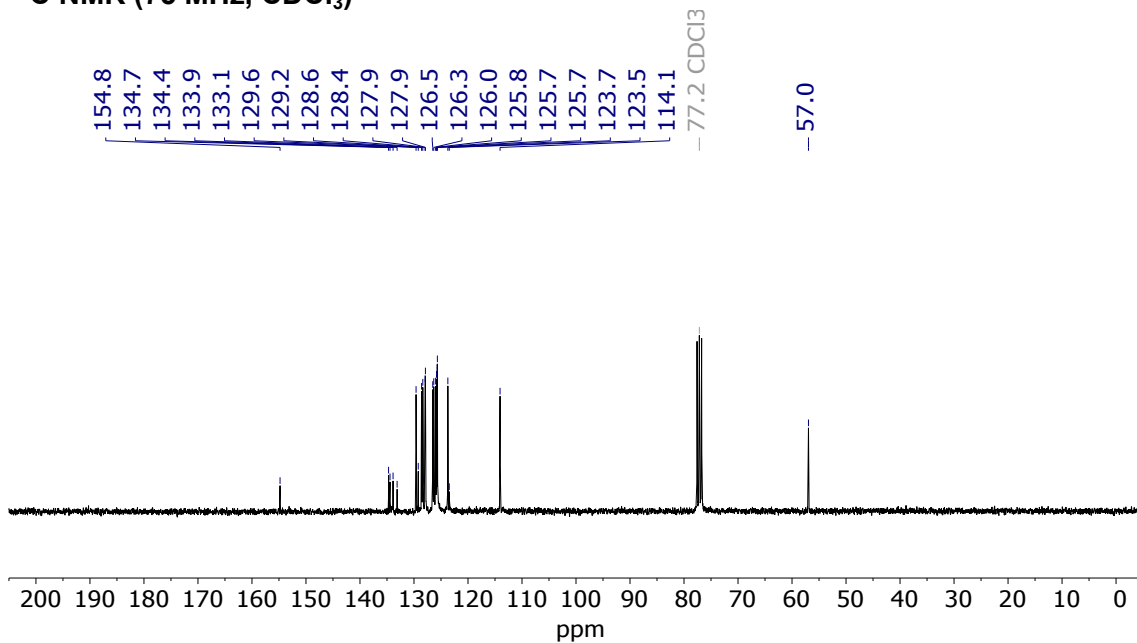

**<sup>1</sup>H NMR (300 MHz, CDCl<sub>3</sub>)**

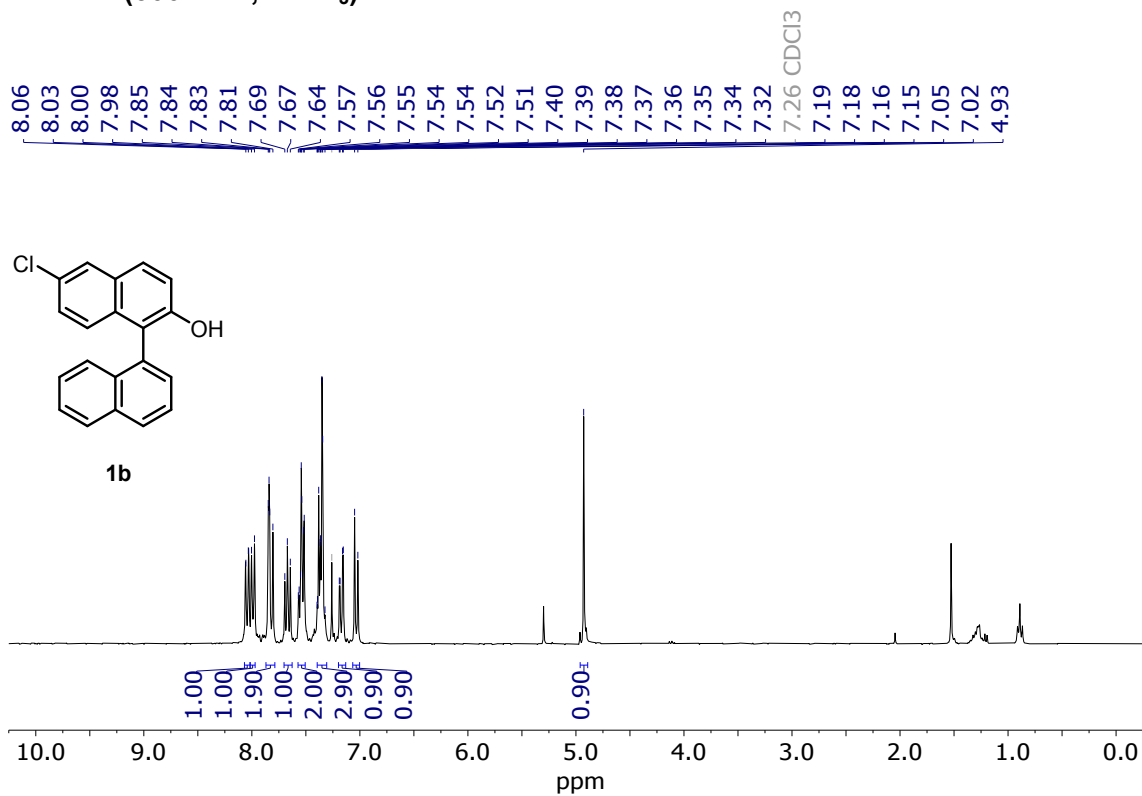

**DEPT-135**

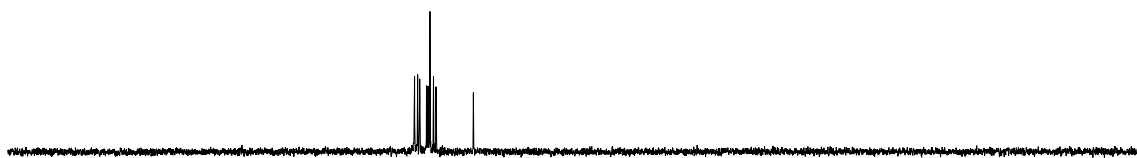

**<sup>13</sup>C NMR (75 MHz, CDCl<sub>3</sub>)**

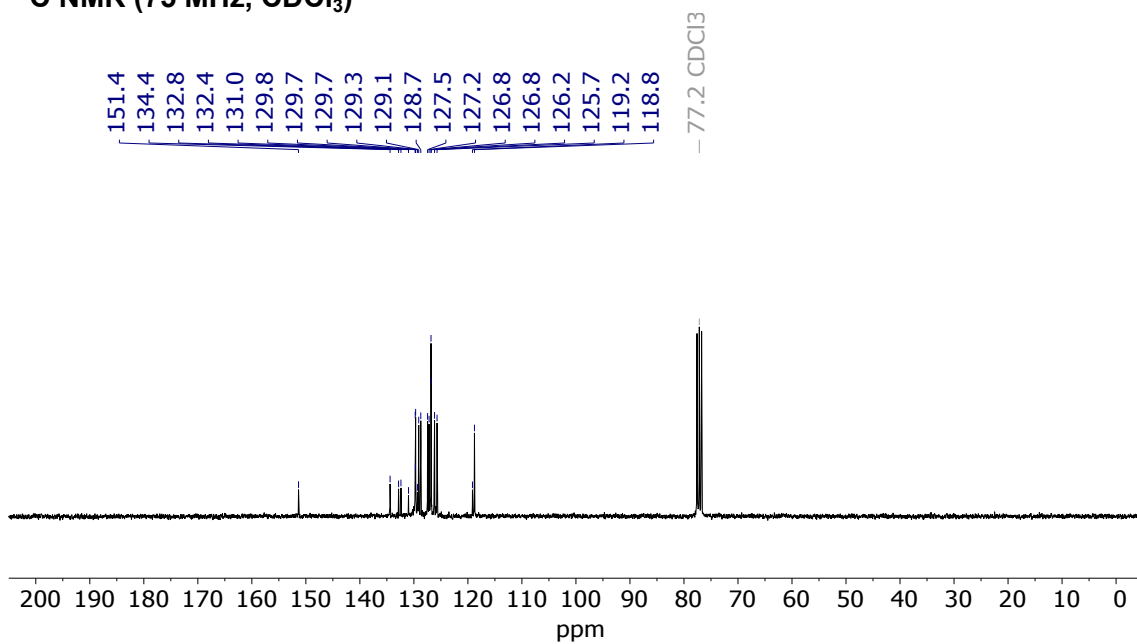

**<sup>1</sup>H NMR (300 MHz, DMSO-d<sub>6</sub>)**

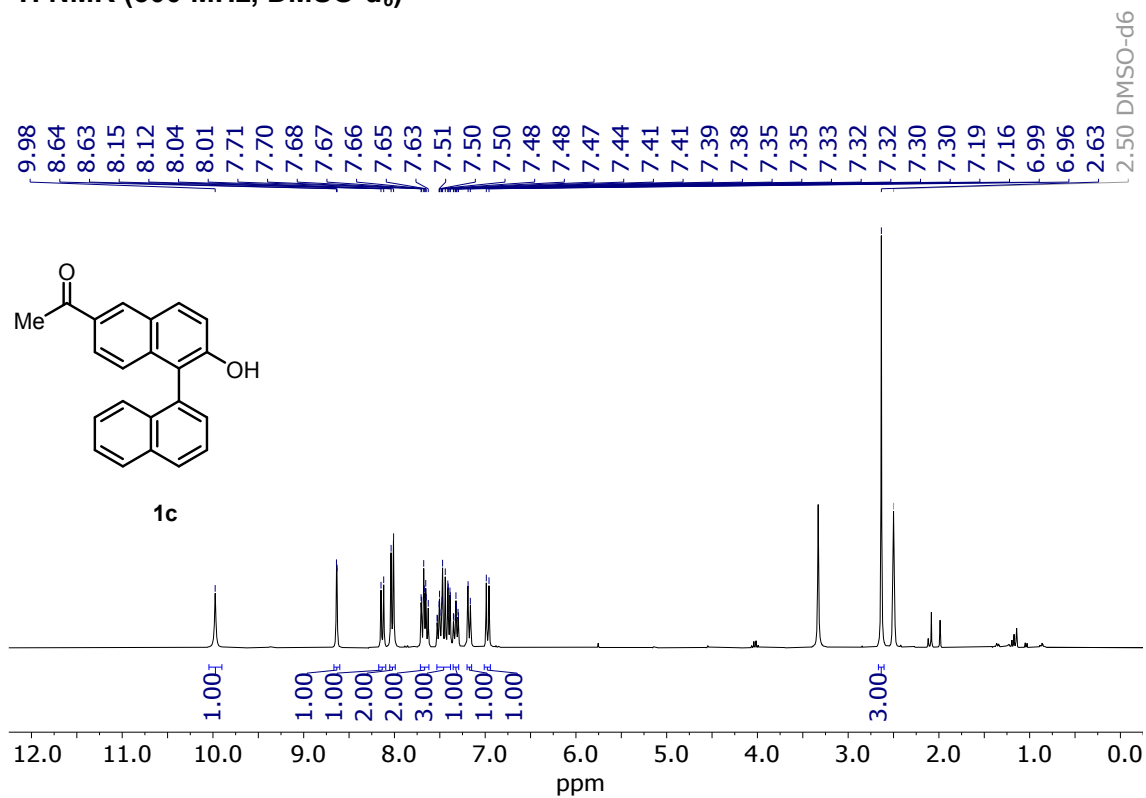

**DEPT-135**

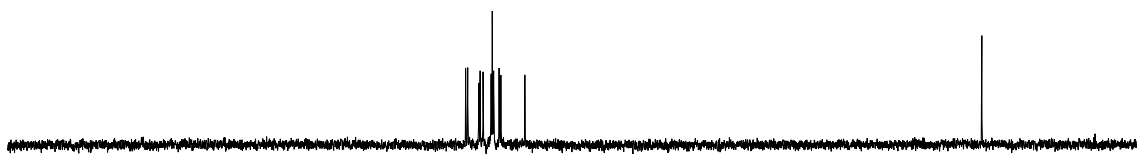

**<sup>13</sup>C NMR (75 MHz, DMSO-d<sub>6</sub>)**

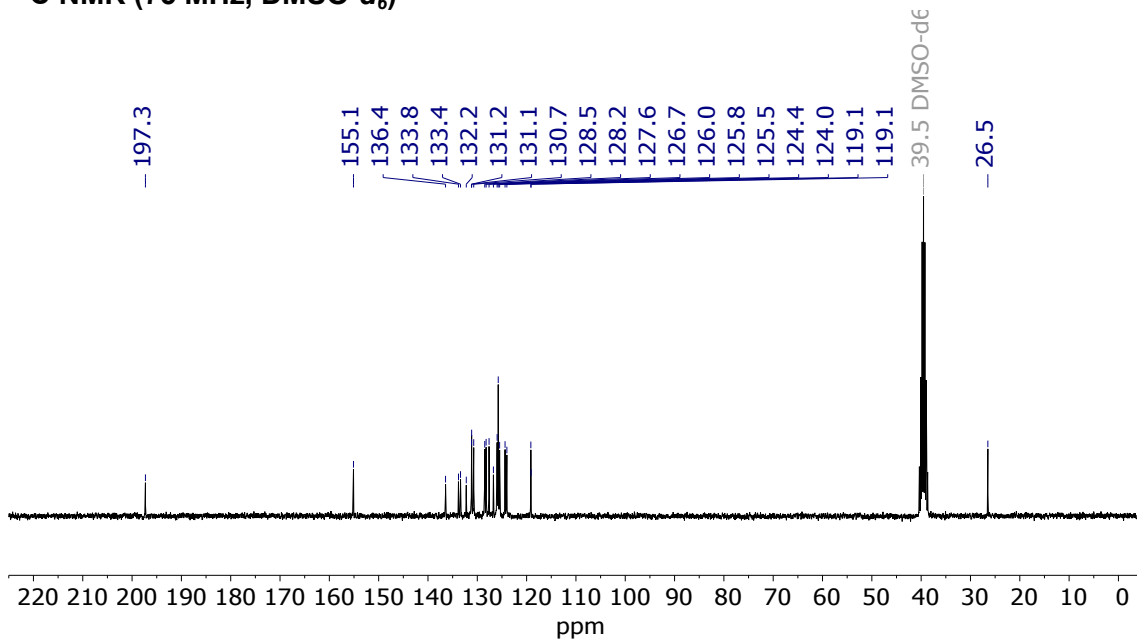





**<sup>1</sup>H NMR (500 MHz, CDCl<sub>3</sub>)**

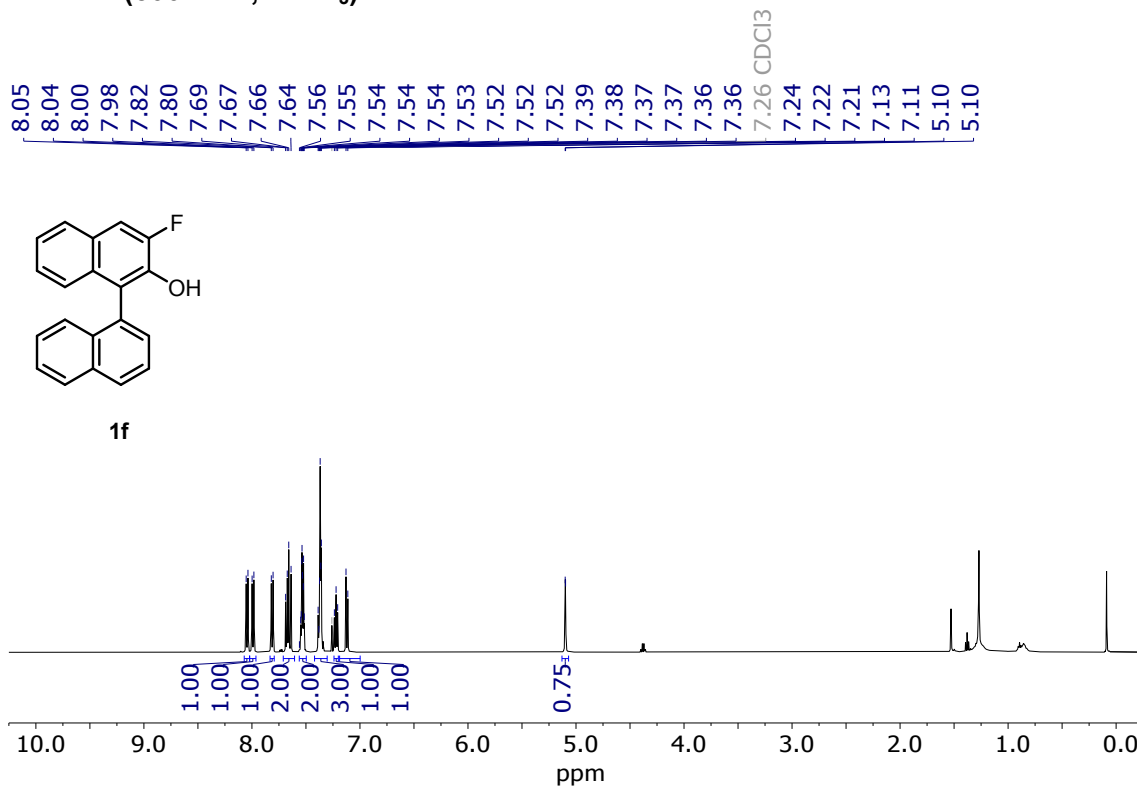

**DEPT-135**

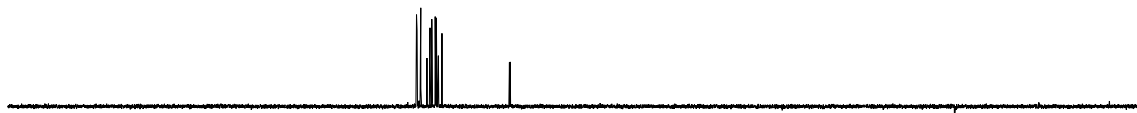

**<sup>13</sup>C NMR (126 MHz, CDCl<sub>3</sub>)**

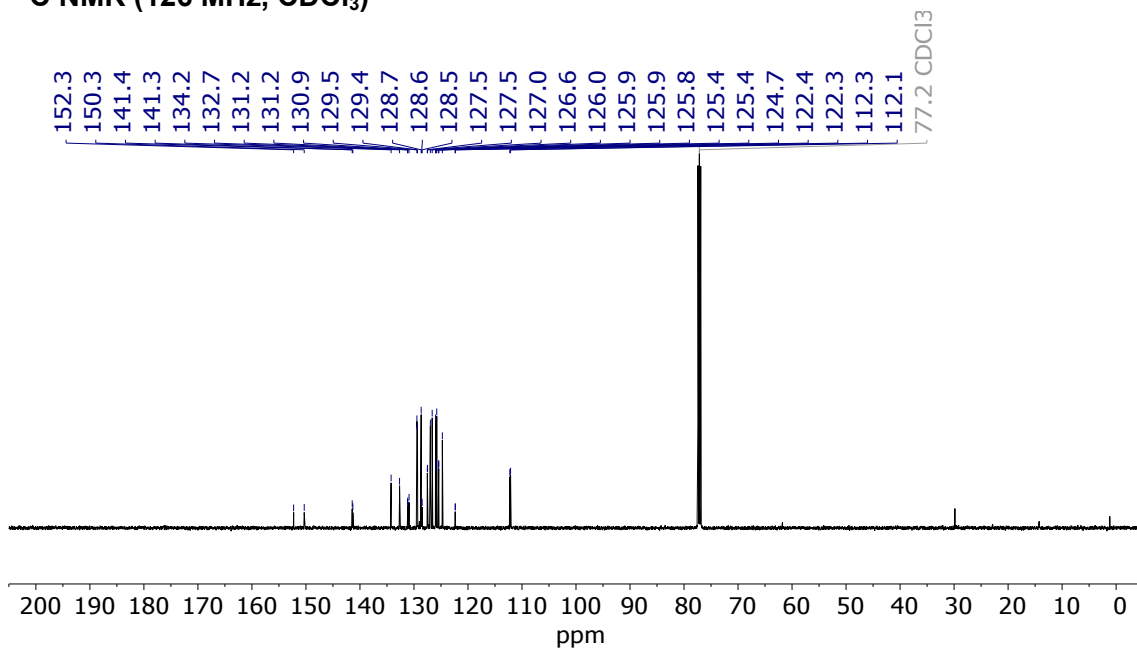

**<sup>1</sup>H NMR (300 MHz, CDCl<sub>3</sub>)**

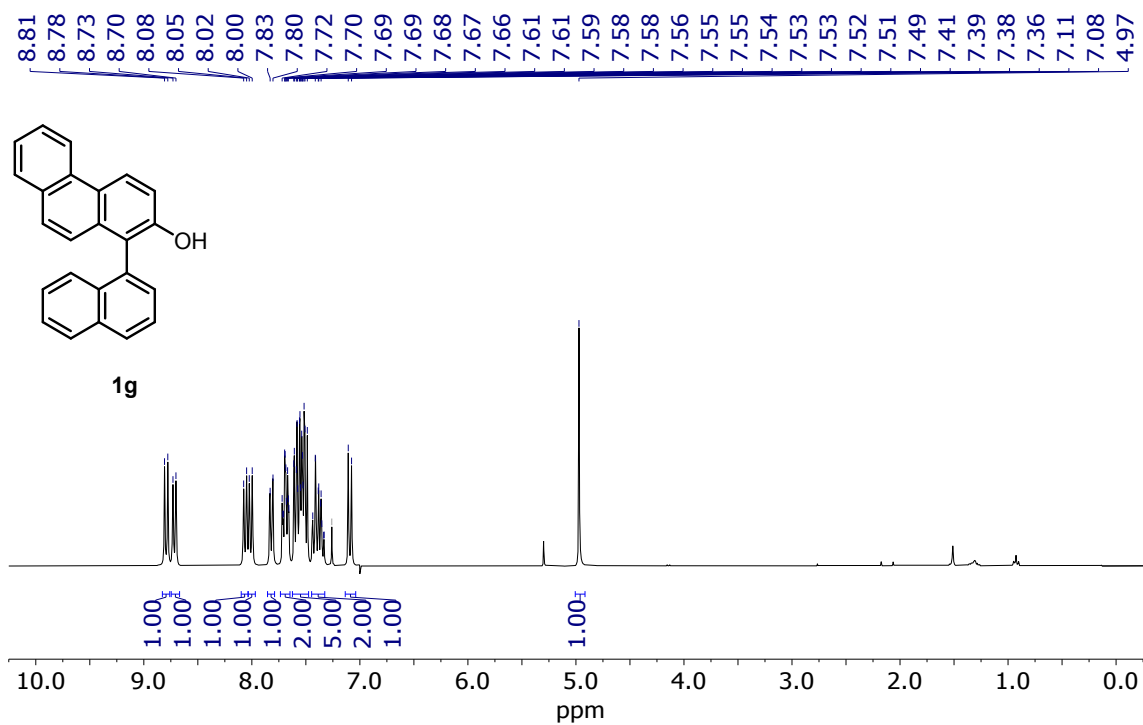

**DEPT-135**

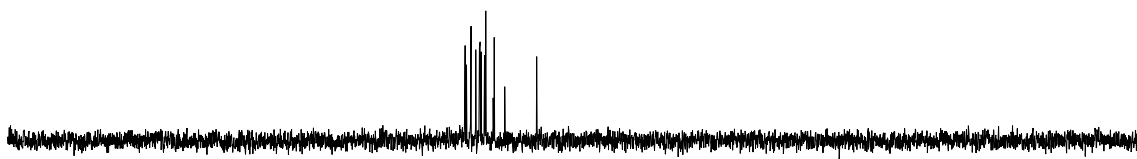

**<sup>13</sup>C NMR (75 MHz, CDCl<sub>3</sub>)**

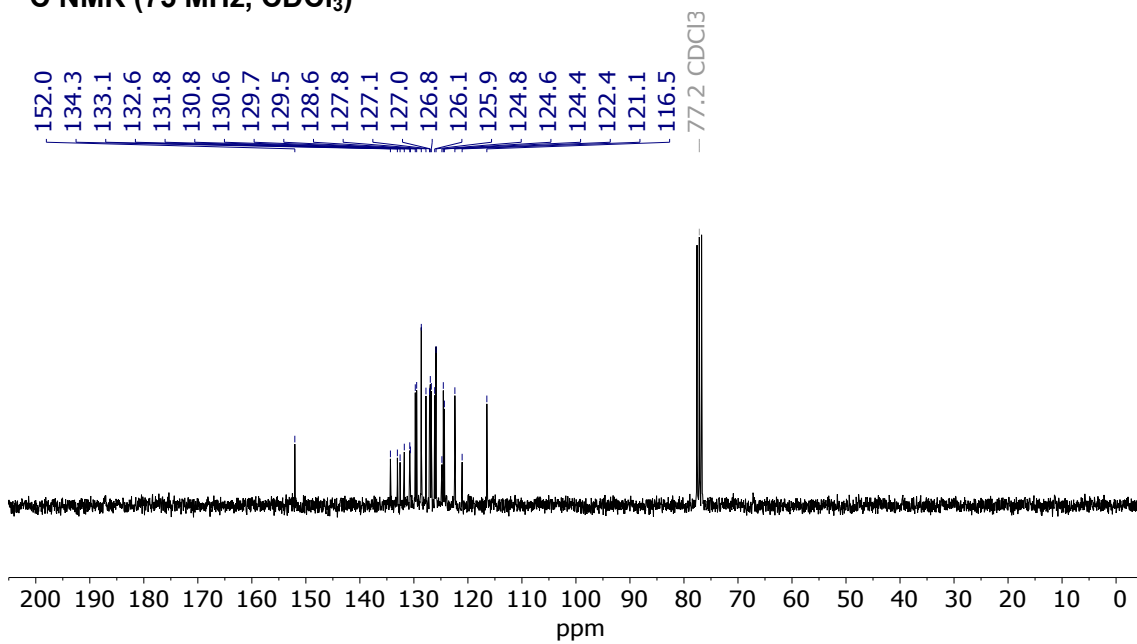

**<sup>1</sup>H NMR (500 MHz, CDCl<sub>3</sub>)**

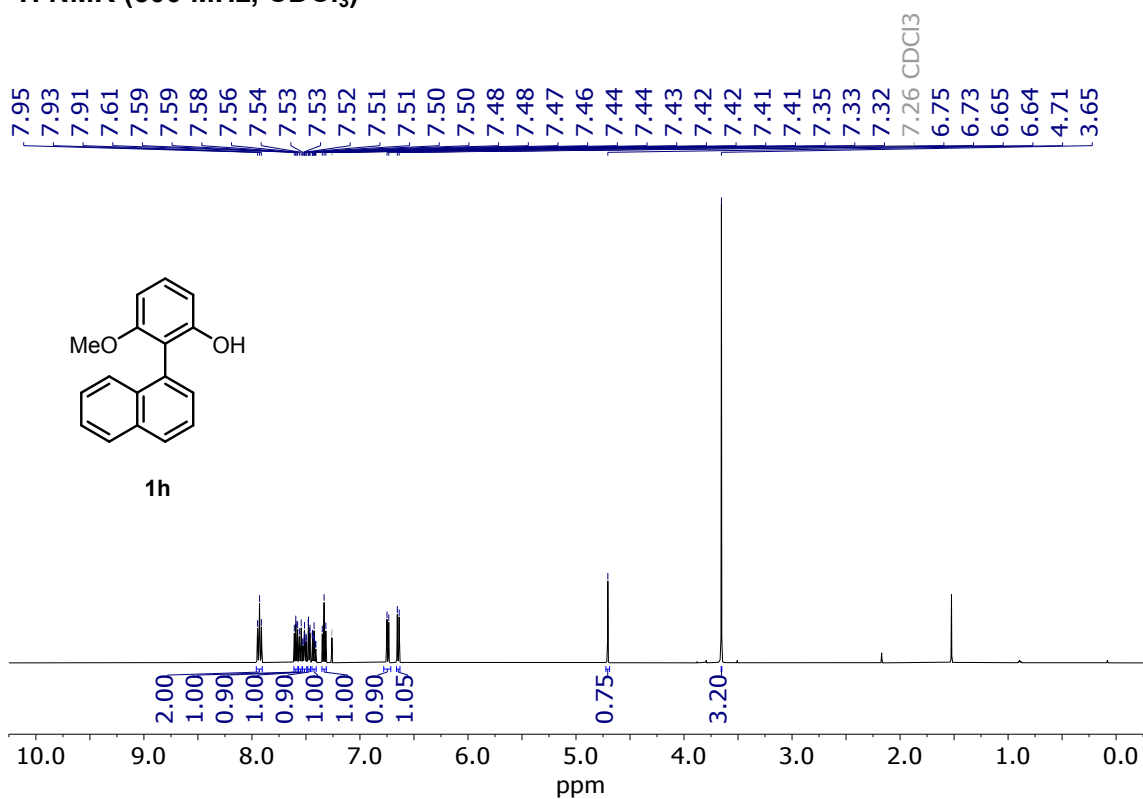

**DEPT-135**

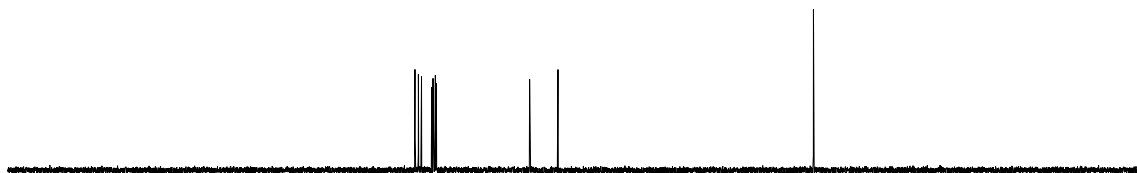

**<sup>13</sup>C NMR (126 MHz, CDCl<sub>3</sub>)**

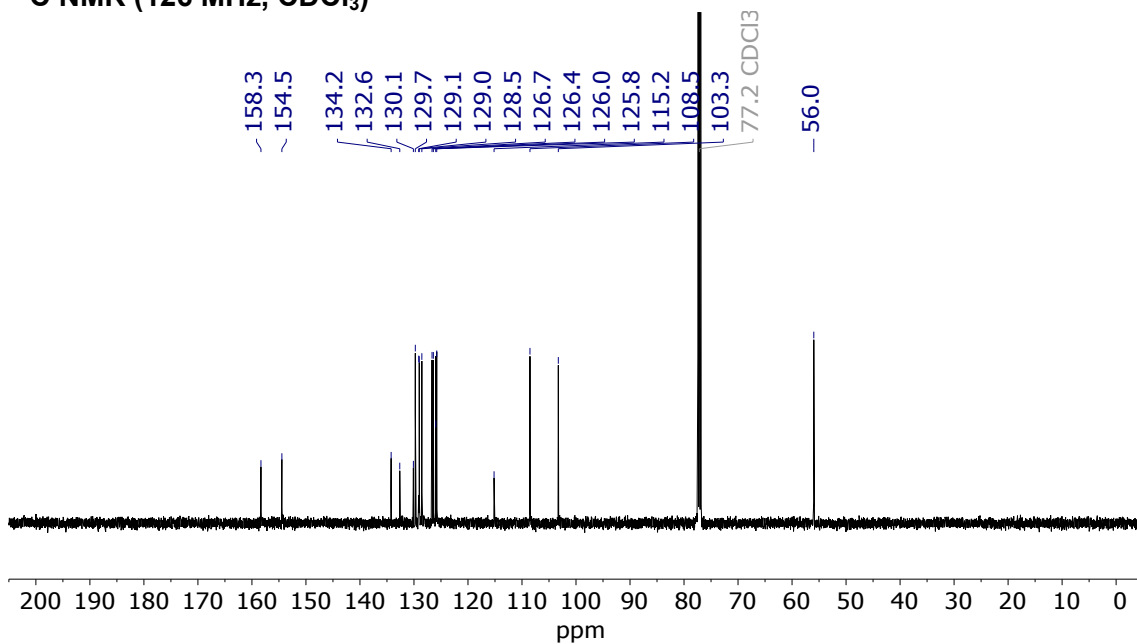



**<sup>1</sup>H NMR (300 MHz, CDCl<sub>3</sub>)**

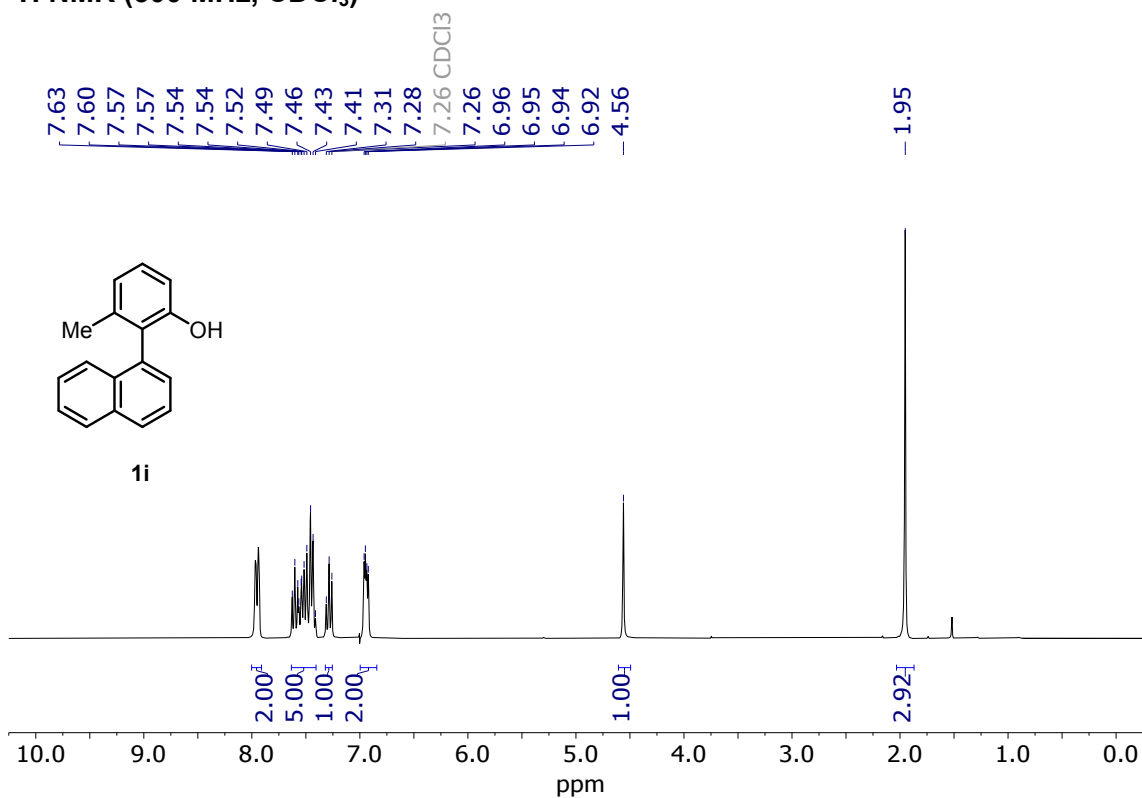

**DEPT-135**

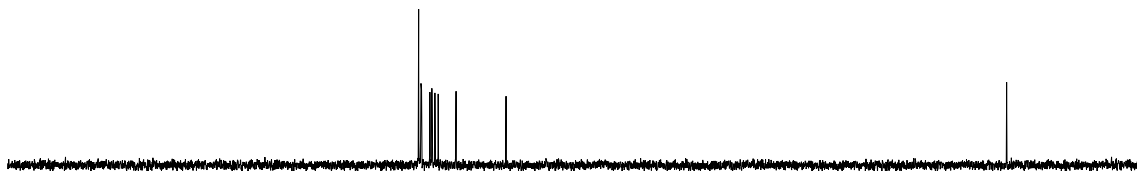

**<sup>13</sup>C NMR (75 MHz, CDCl<sub>3</sub>)**

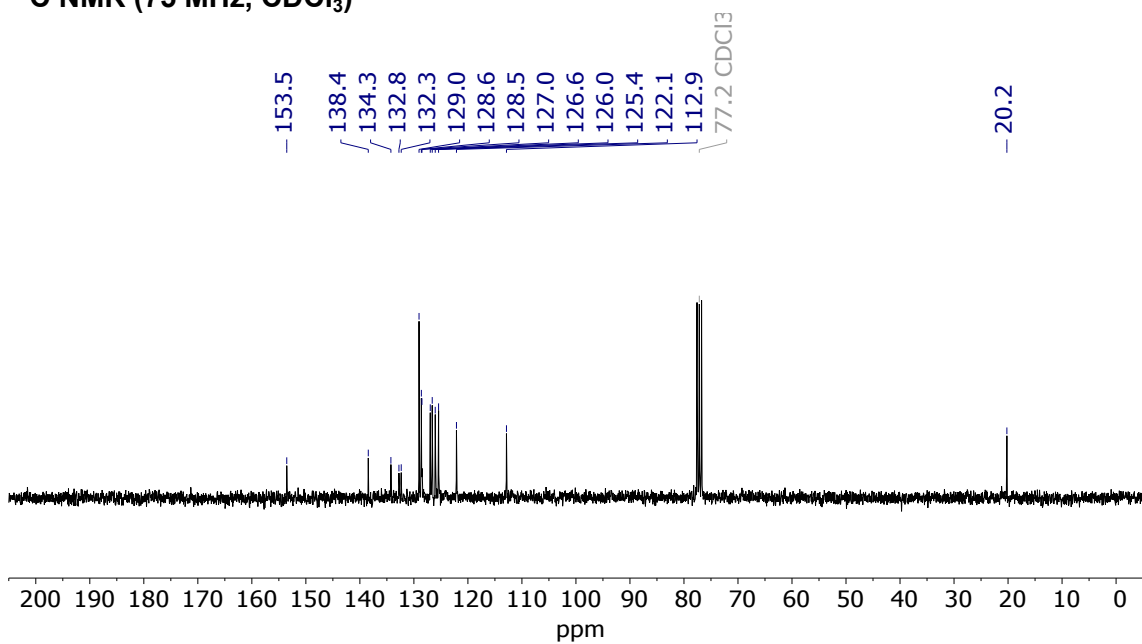

**<sup>1</sup>H NMR (300 MHz, CDCl<sub>3</sub>)**

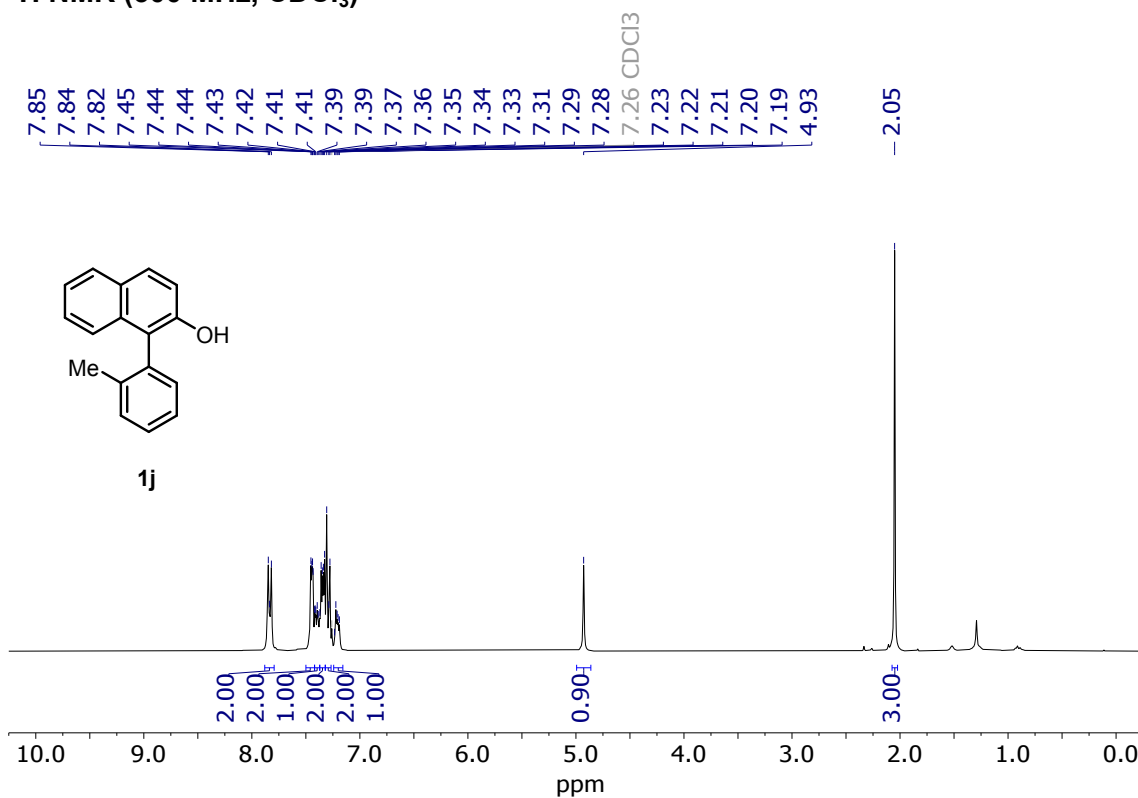

**DEPT-135**

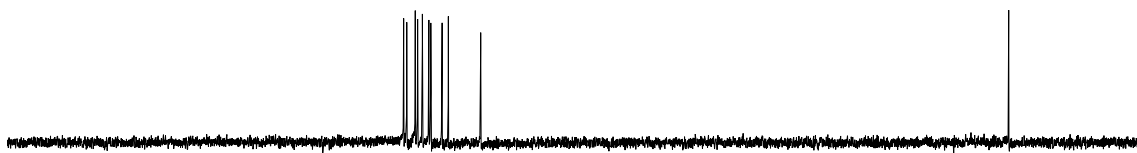

**<sup>13</sup>C NMR (75 MHz, CDCl<sub>3</sub>)**

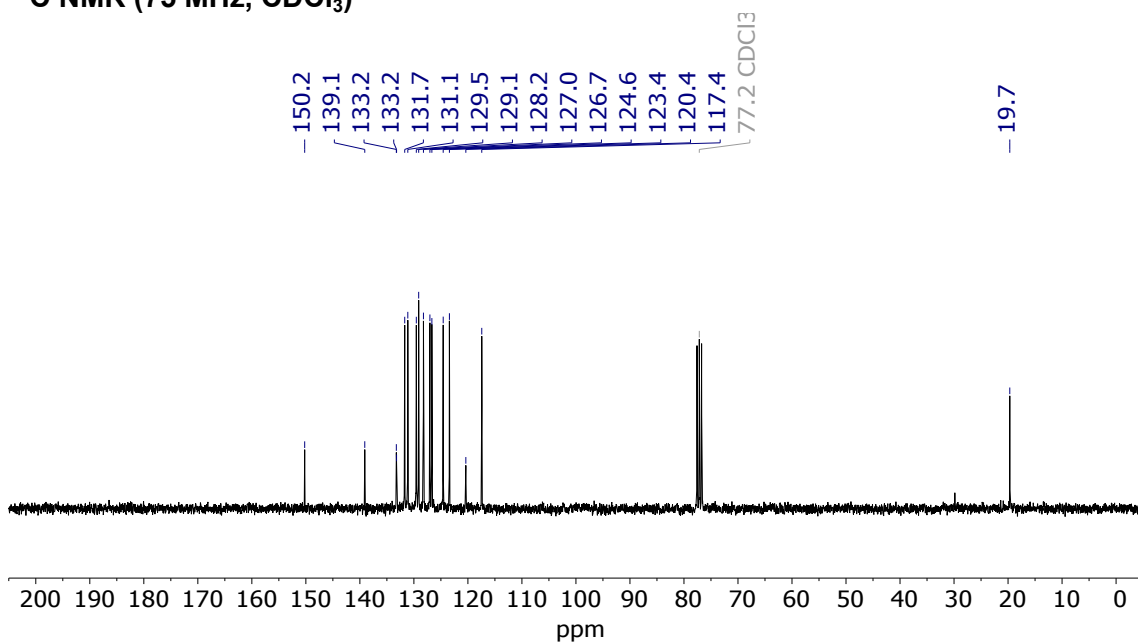

**<sup>1</sup>H NMR (300 MHz, CDCl<sub>3</sub>)**

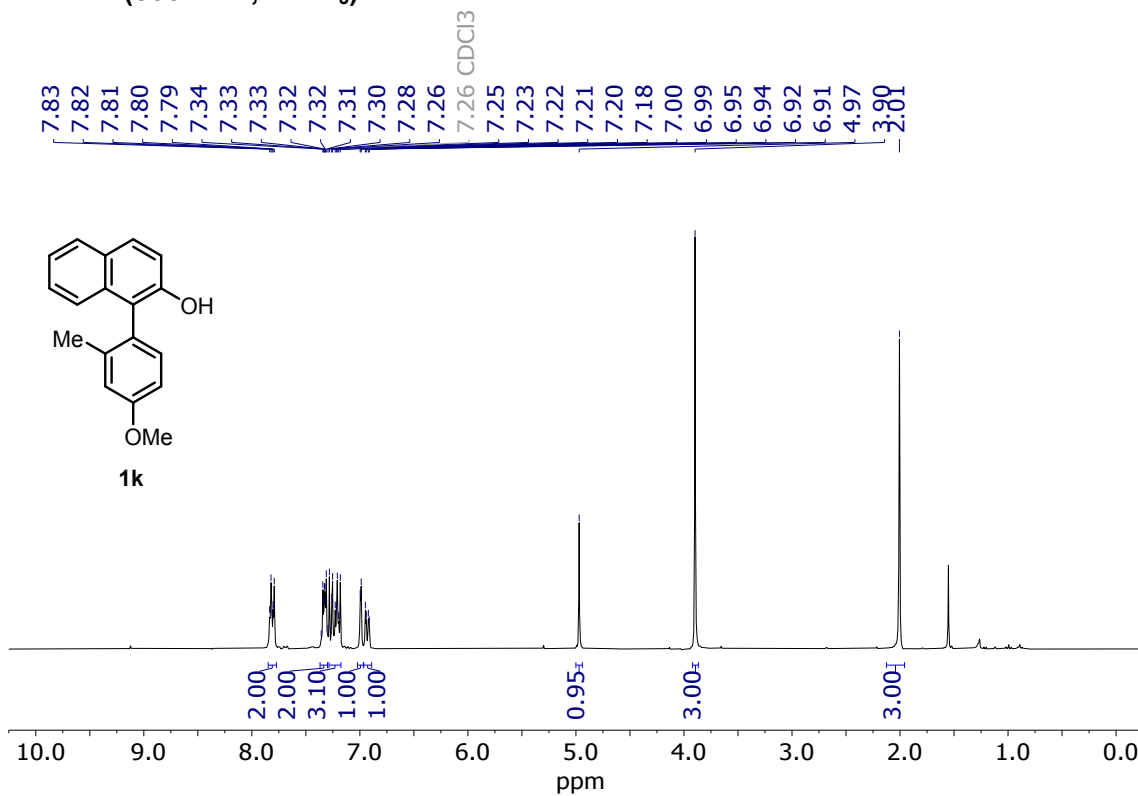

**DEPT-135**

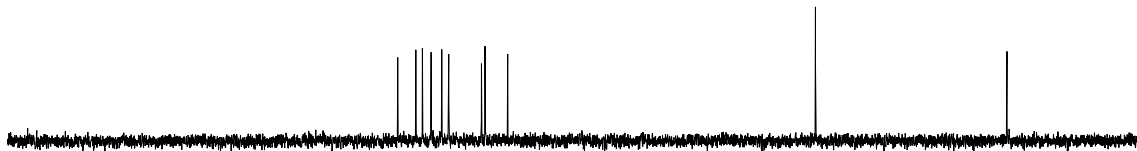

**<sup>13</sup>C NMR (75 MHz, CDCl<sub>3</sub>)**

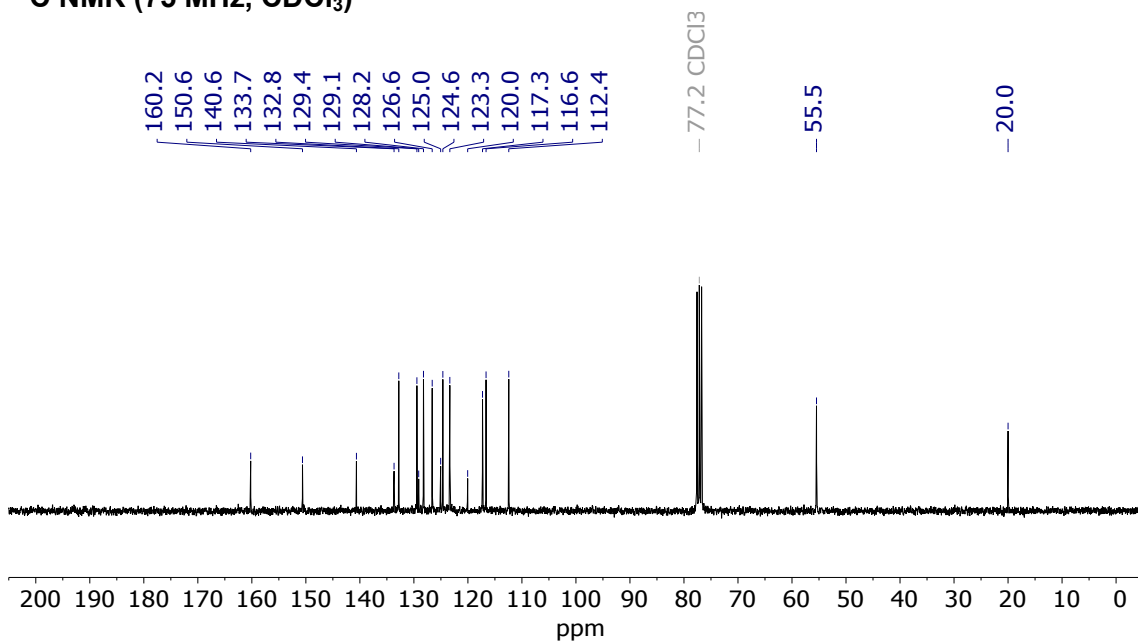

**<sup>1</sup>H NMR (300 MHz, CDCl<sub>3</sub>)**

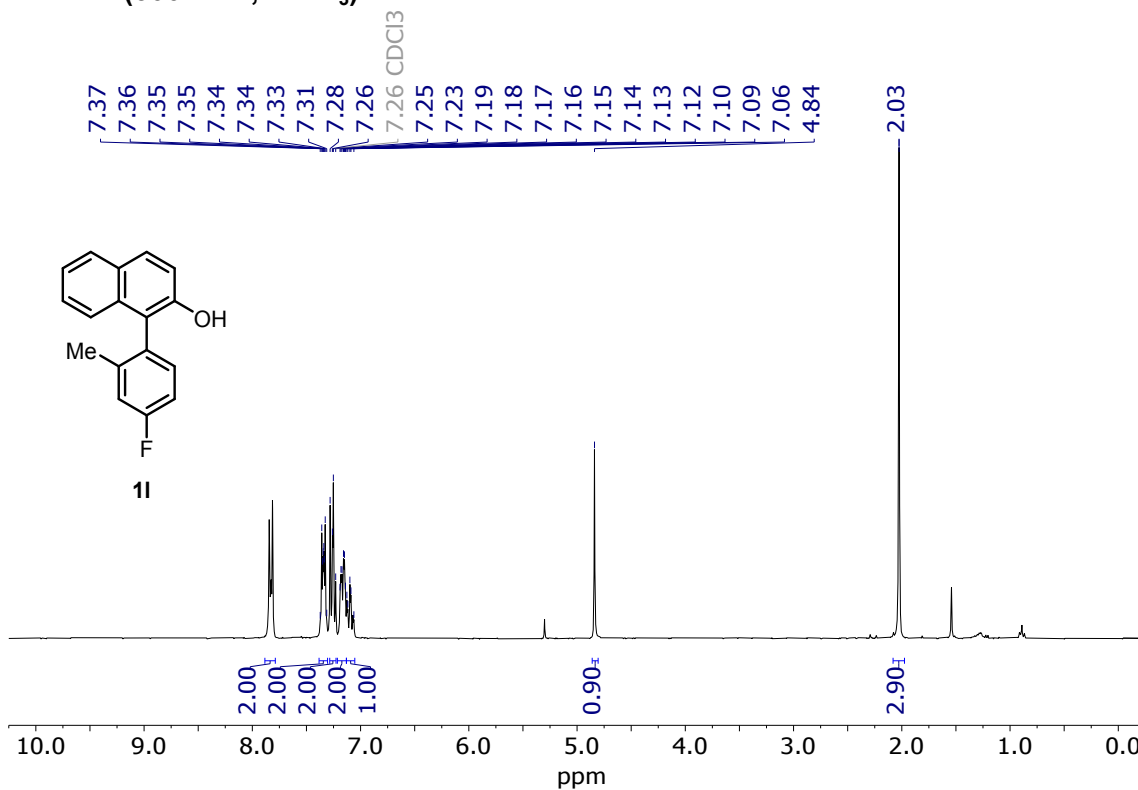

**DEPT-135**

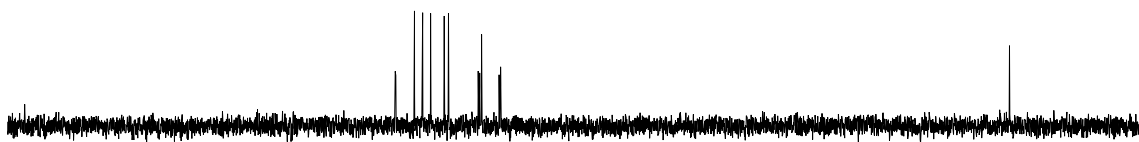

**<sup>13</sup>C NMR (75 MHz, CDCl<sub>3</sub>)**

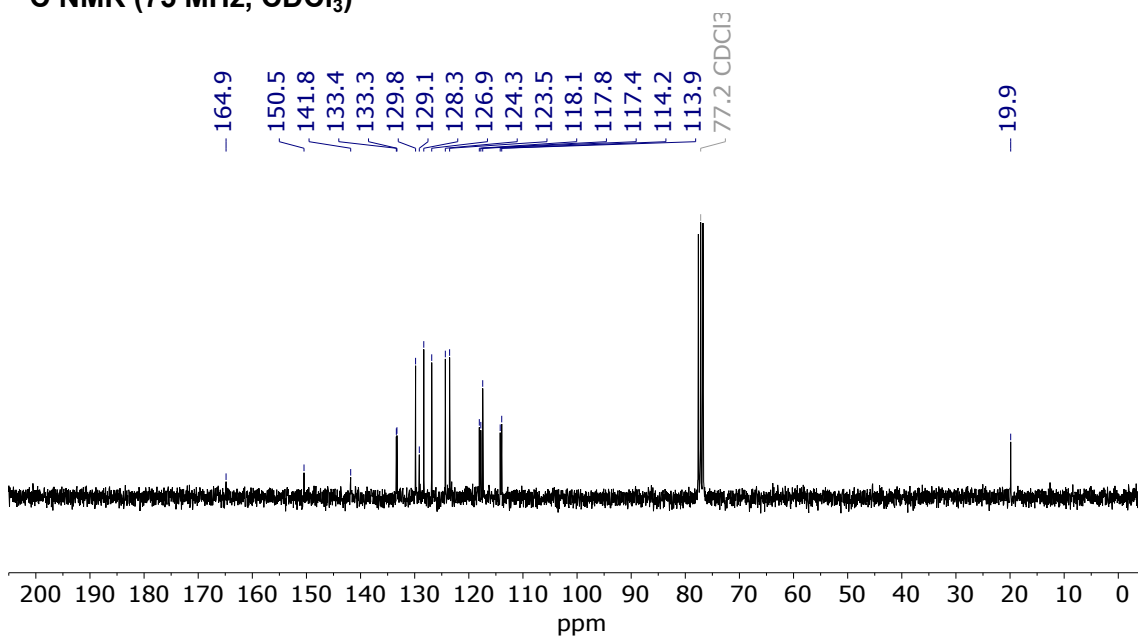

**<sup>1</sup>H NMR (500 MHz, CDCl<sub>3</sub>)**

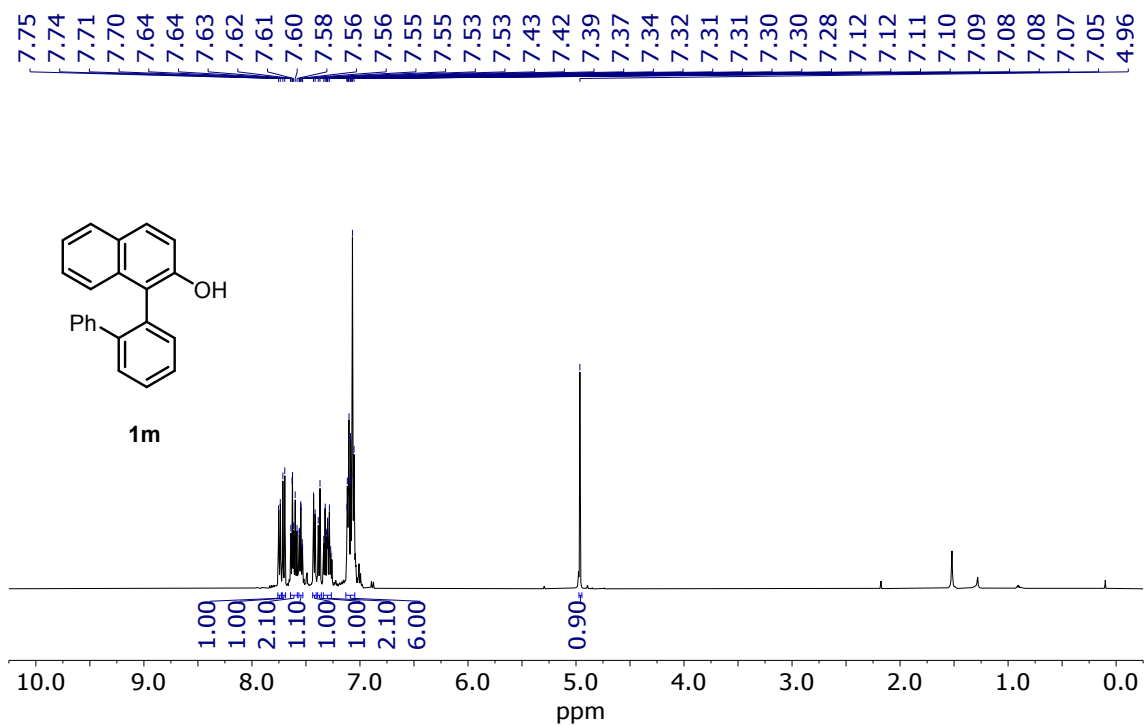

**DEPT-135**

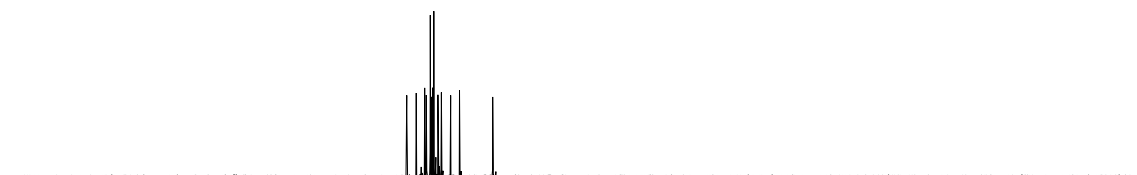

**<sup>13</sup>C NMR (126 MHz, CDCl<sub>3</sub>)**

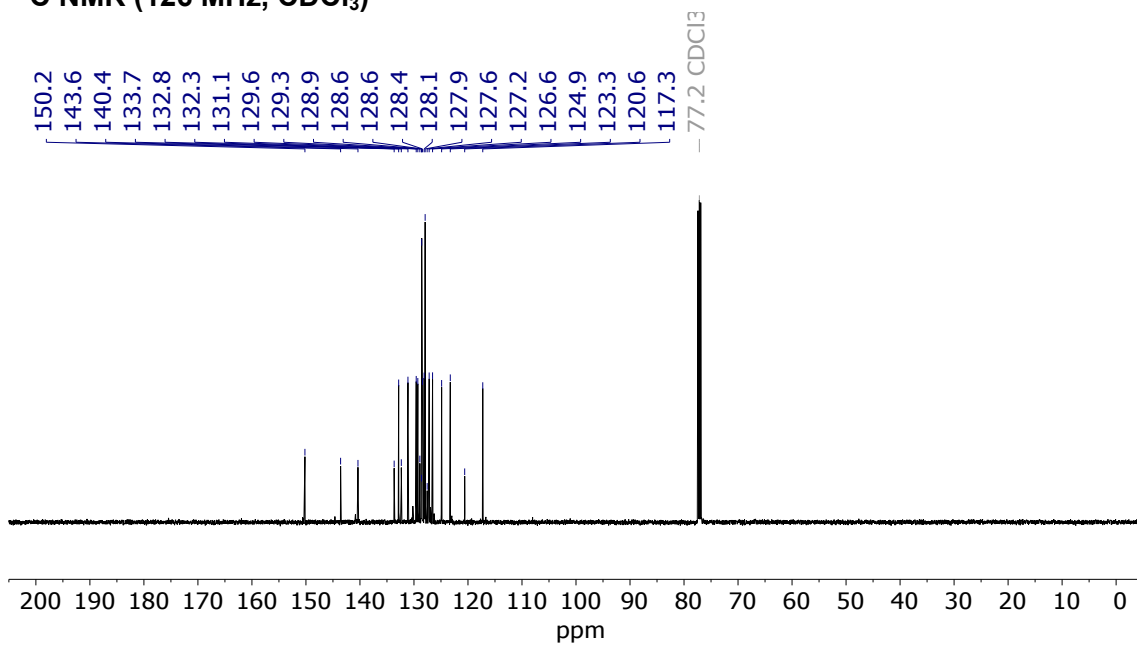

**<sup>1</sup>H NMR (300 MHz, CDCl<sub>3</sub>)**

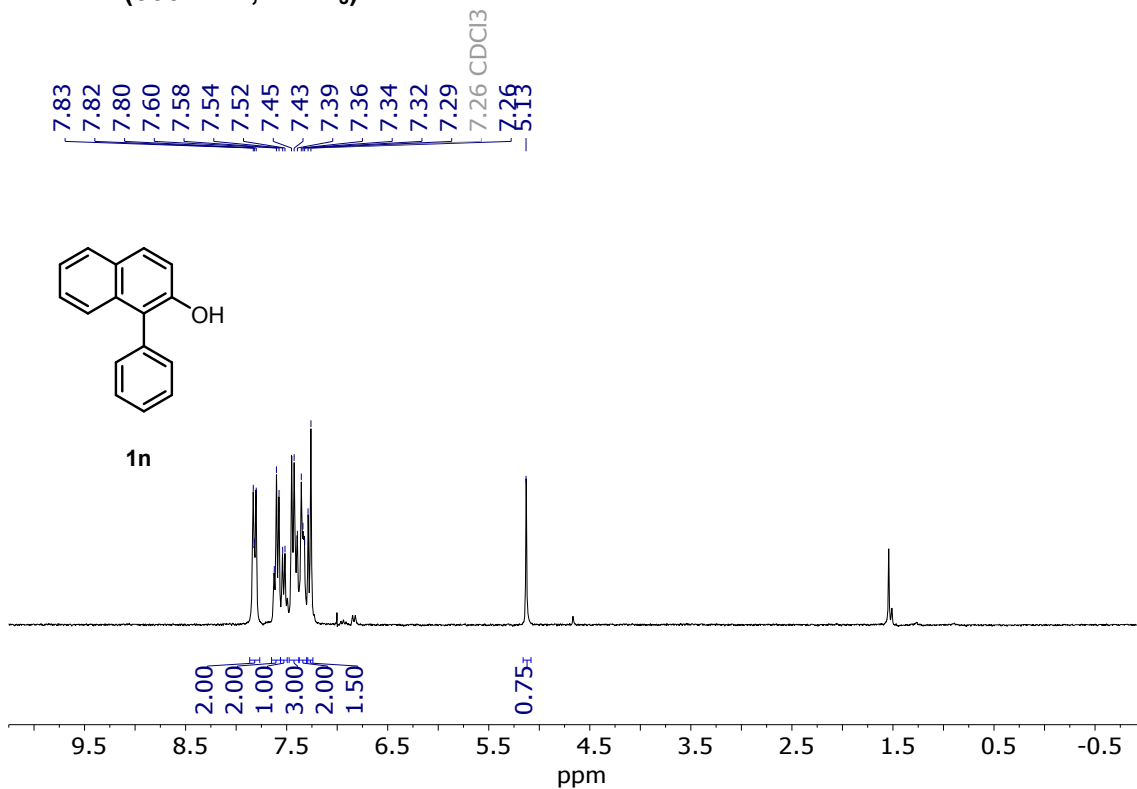

**DEPT-135**

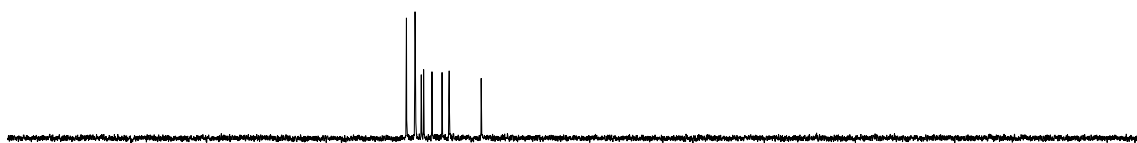

**<sup>13</sup>C NMR (75 MHz, CDCl<sub>3</sub>)**

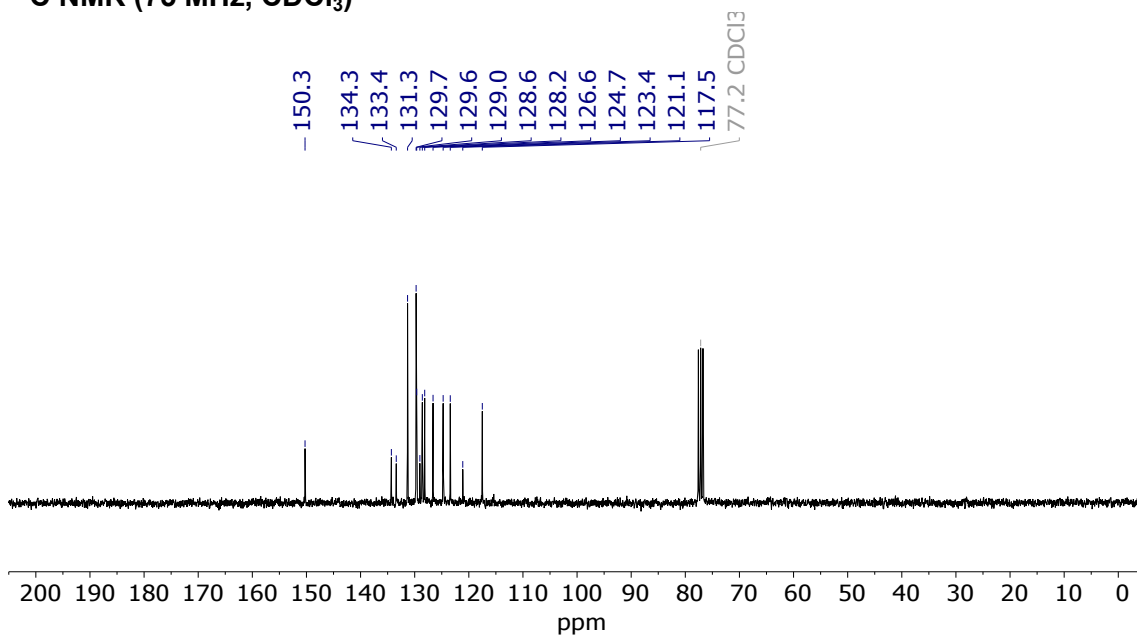

**<sup>1</sup>H NMR (300 MHz, CDCl<sub>3</sub>)**

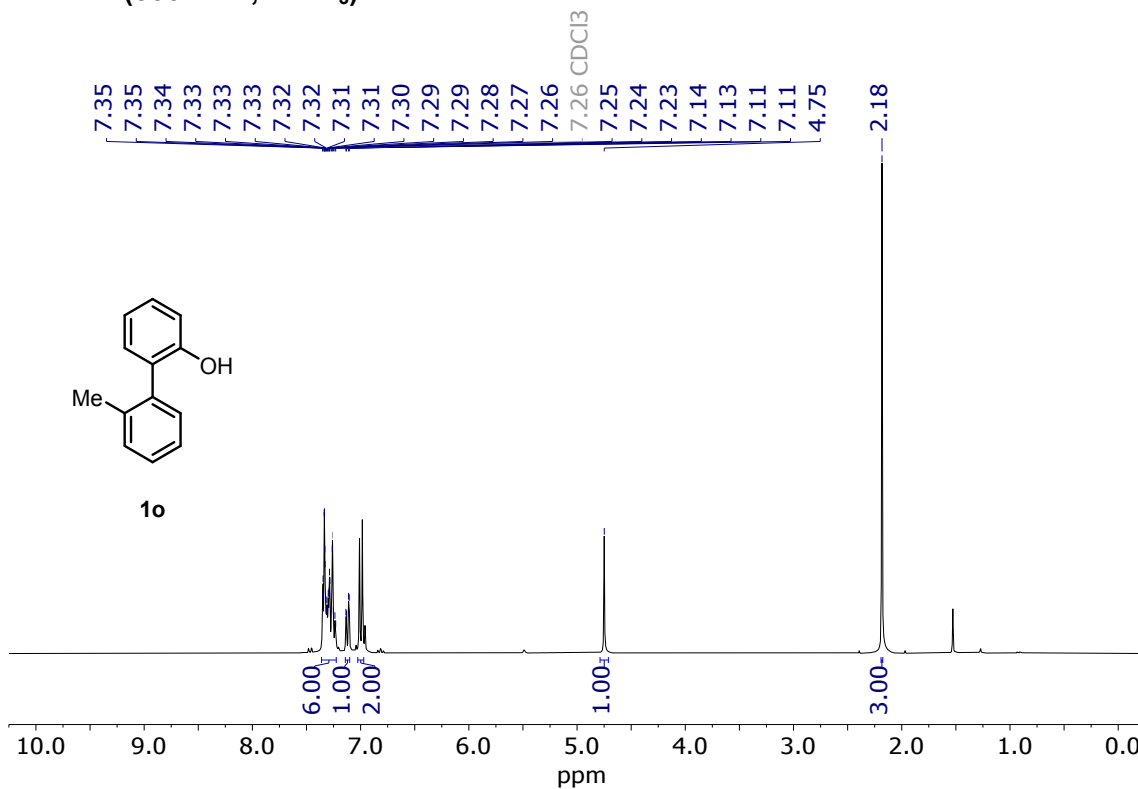

**DEPT-135**

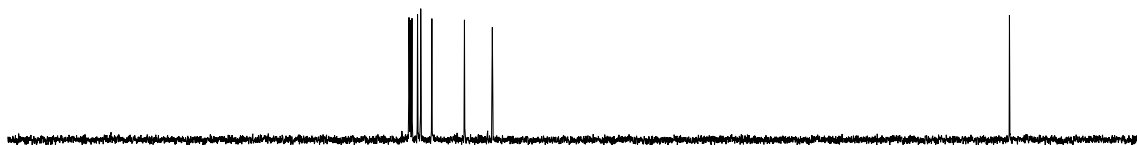

**<sup>13</sup>C NMR (75 MHz, CDCl<sub>3</sub>)**

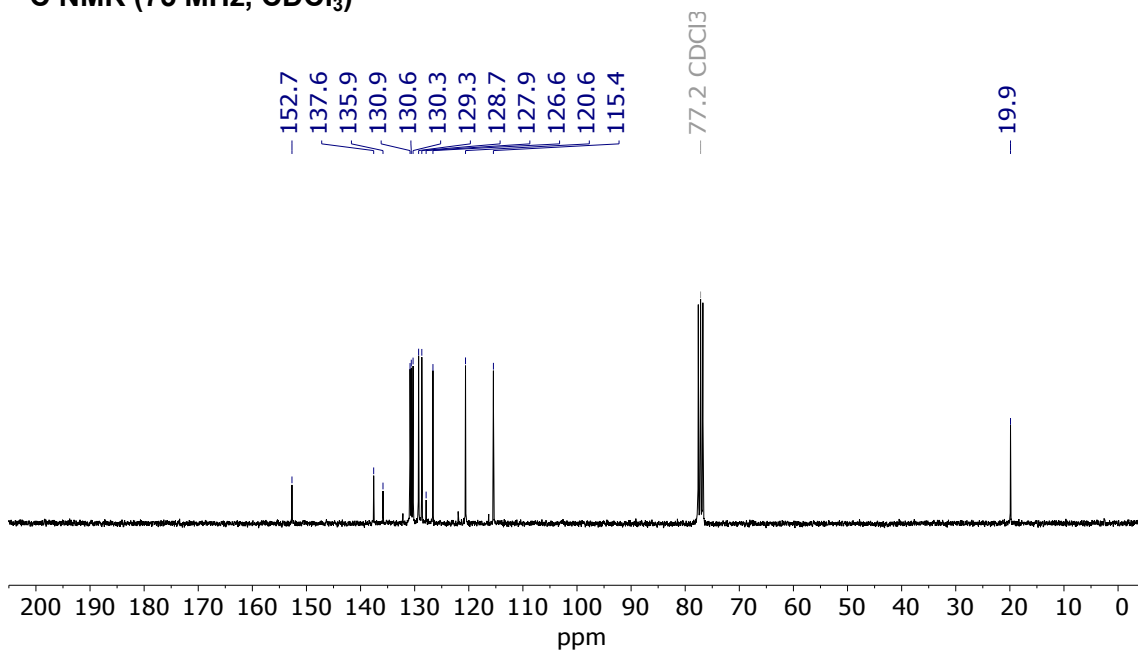

**<sup>1</sup>H NMR (500 MHz, CDCl<sub>3</sub>)**

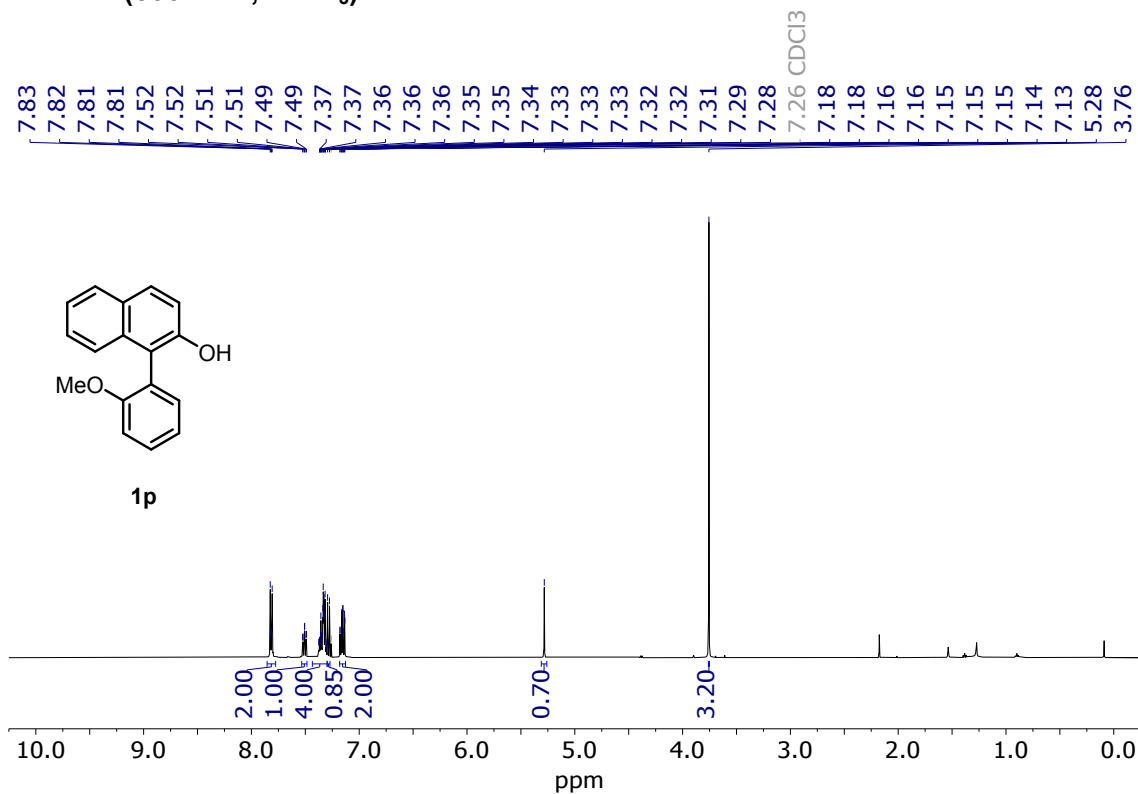

**DEPT-135**

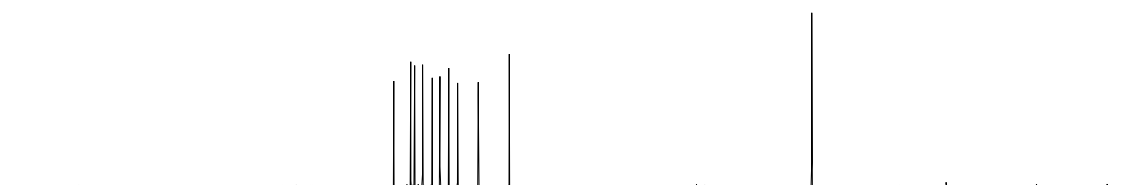

**<sup>13</sup>C NMR (126 MHz, CDCl<sub>3</sub>)**

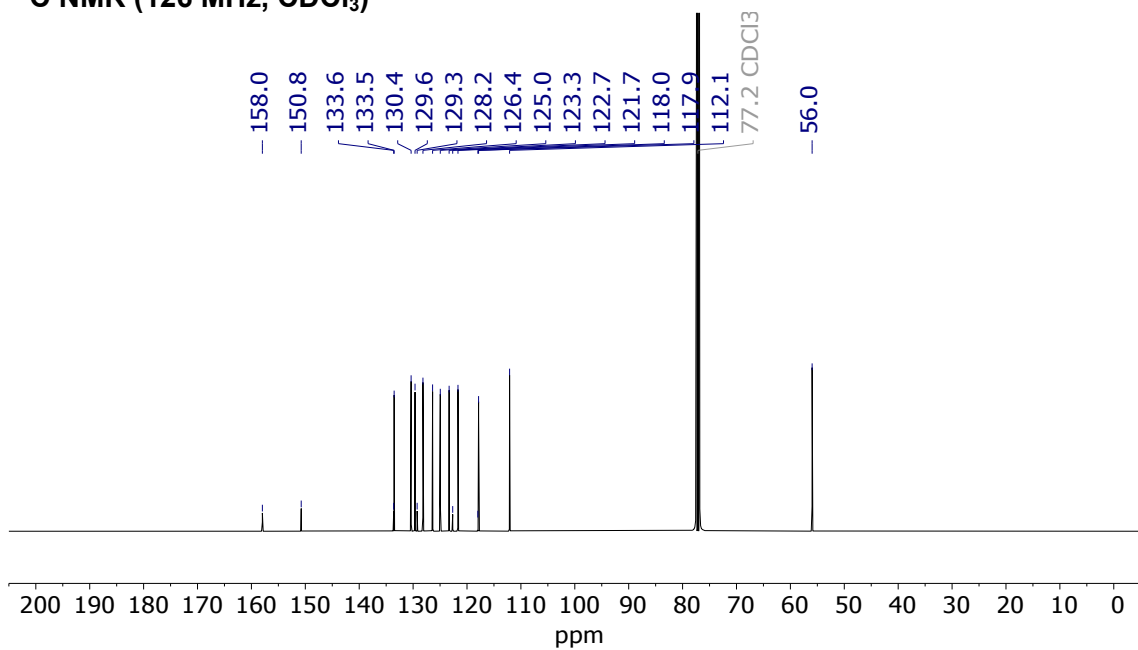



**<sup>1</sup>H NMR (500 MHz, CDCl<sub>3</sub>)**

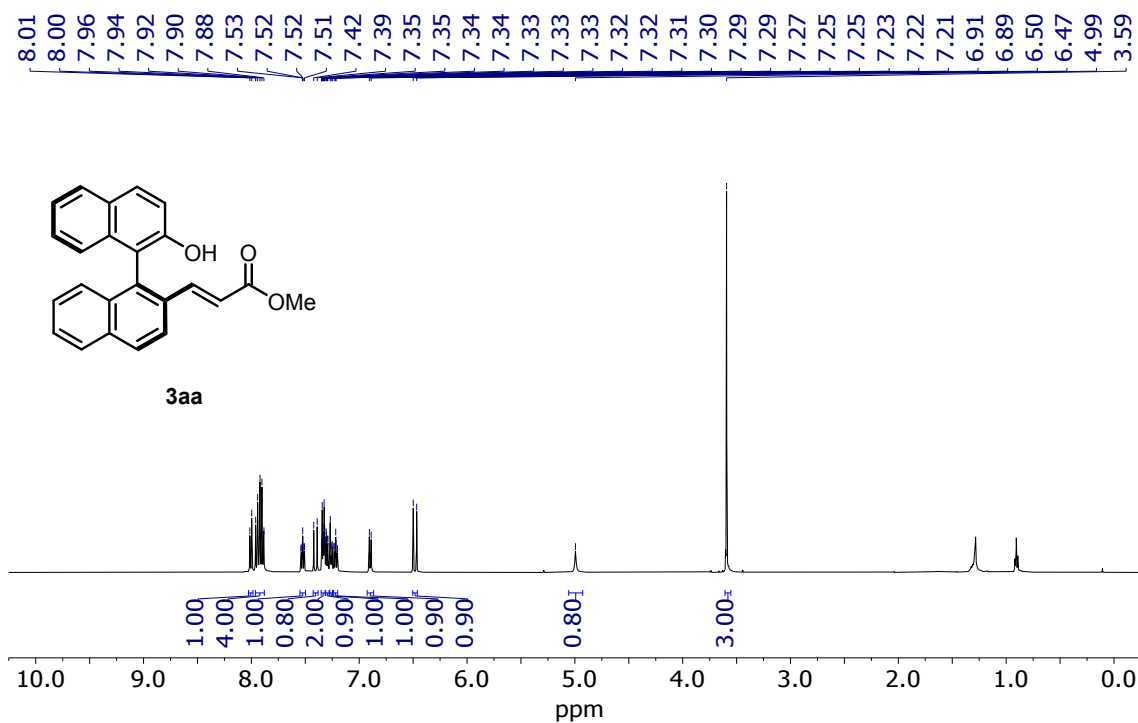

**DEPT-135**

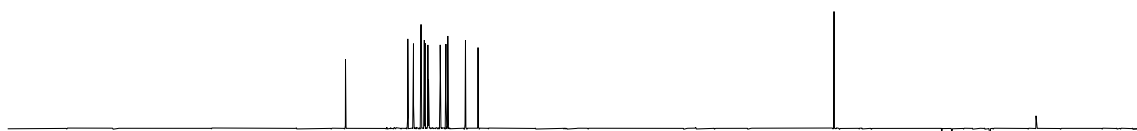

**<sup>13</sup>C NMR (126 MHz, CDCl<sub>3</sub>)**

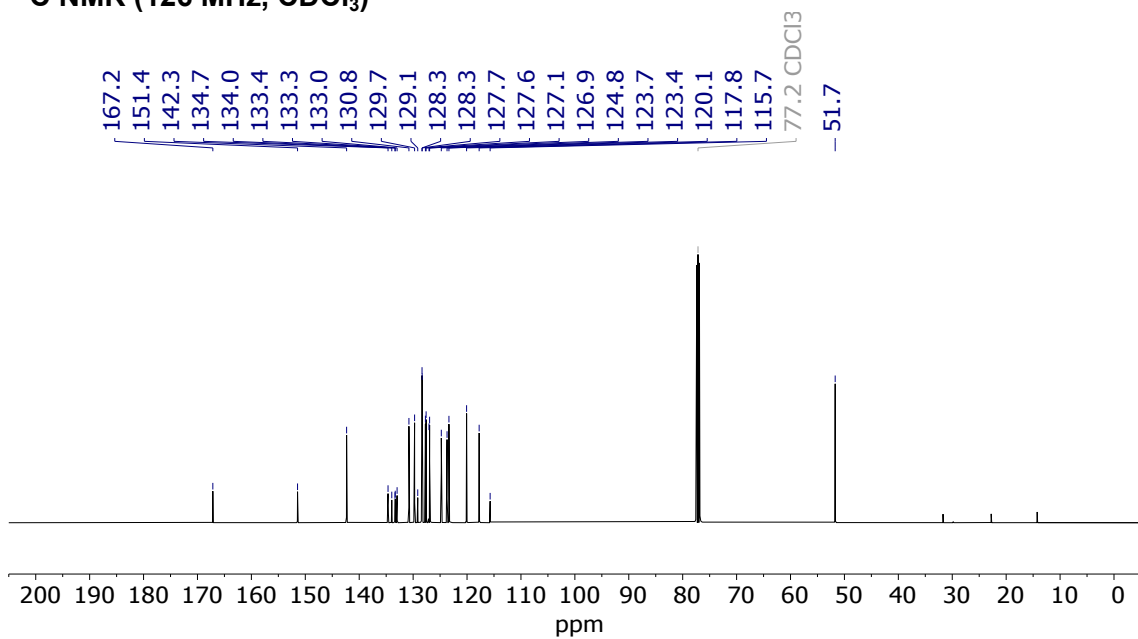

**<sup>1</sup>H NMR (500 MHz, CDCl<sub>3</sub>)**

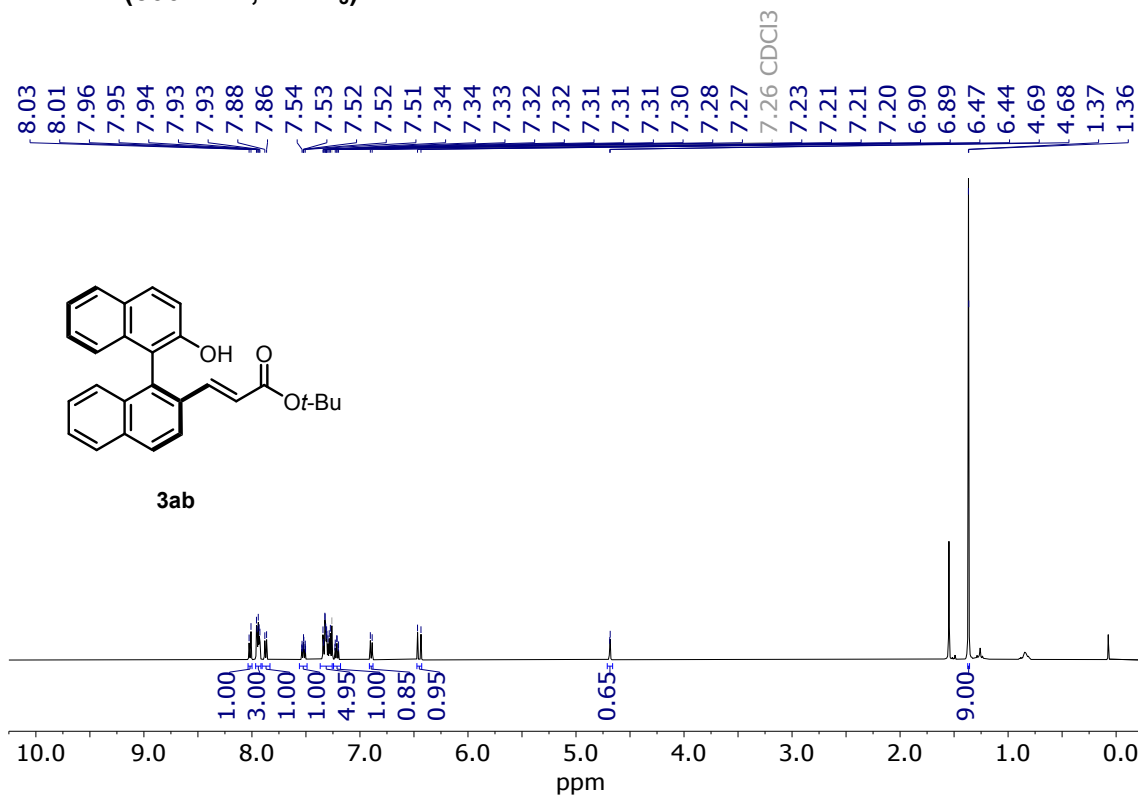

**DEPT-135**

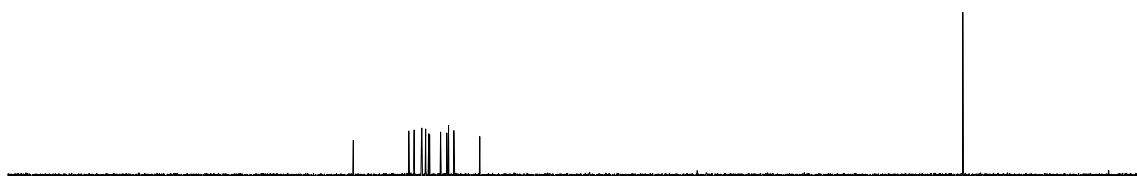

**<sup>13</sup>C NMR (126 MHz, CDCl<sub>3</sub>)**

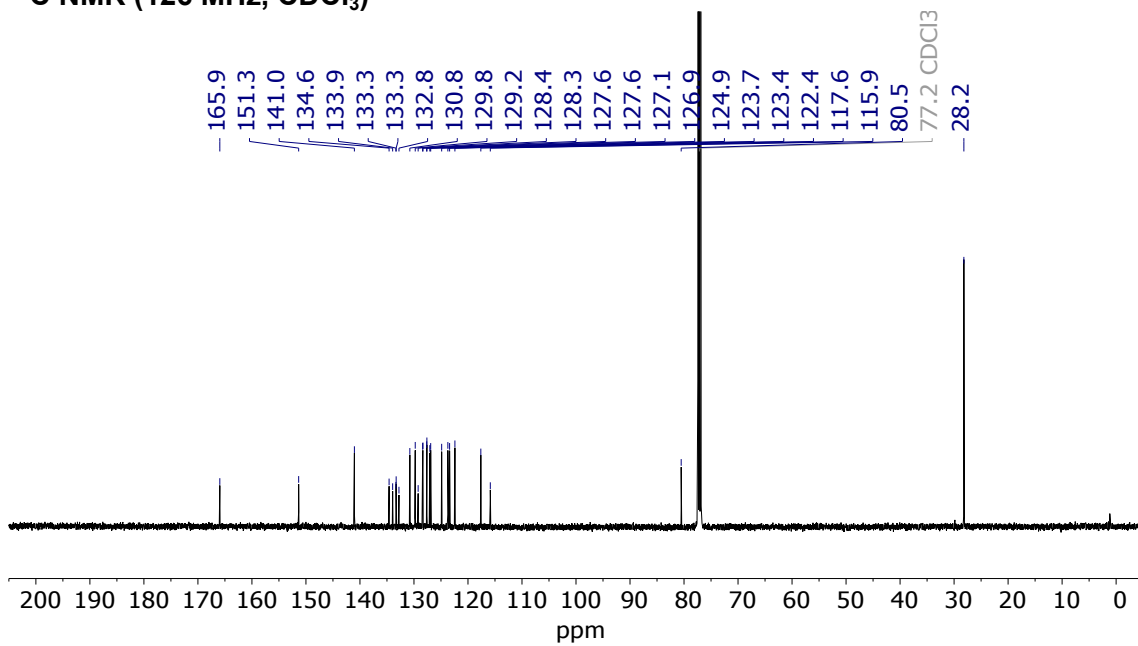

**<sup>1</sup>H NMR (300 MHz, CDCl<sub>3</sub>)**

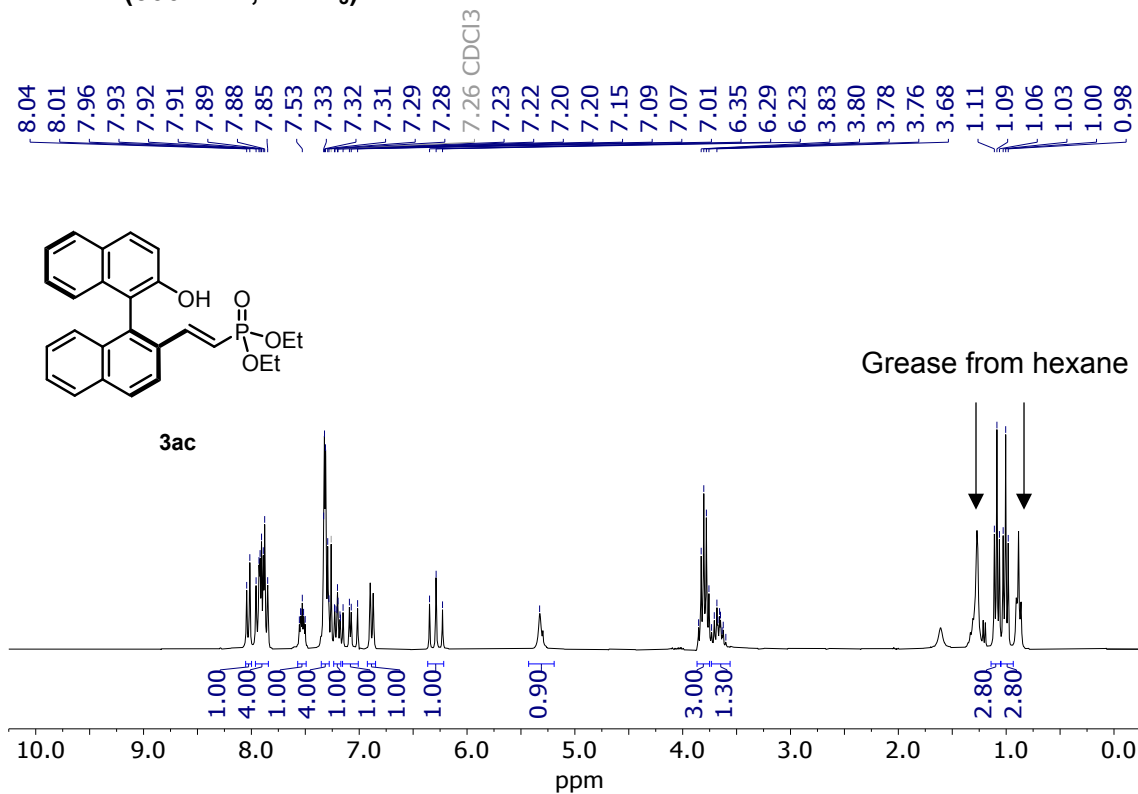

**DEPT-135**

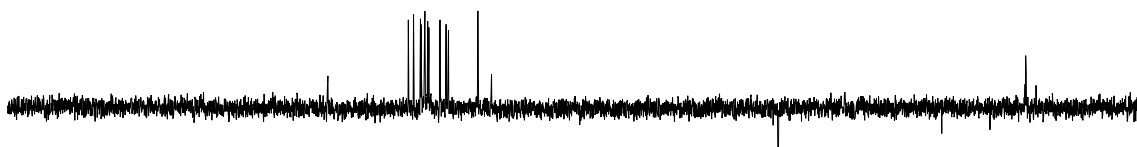

**<sup>13</sup>C NMR (75 MHz, CDCl<sub>3</sub>)**

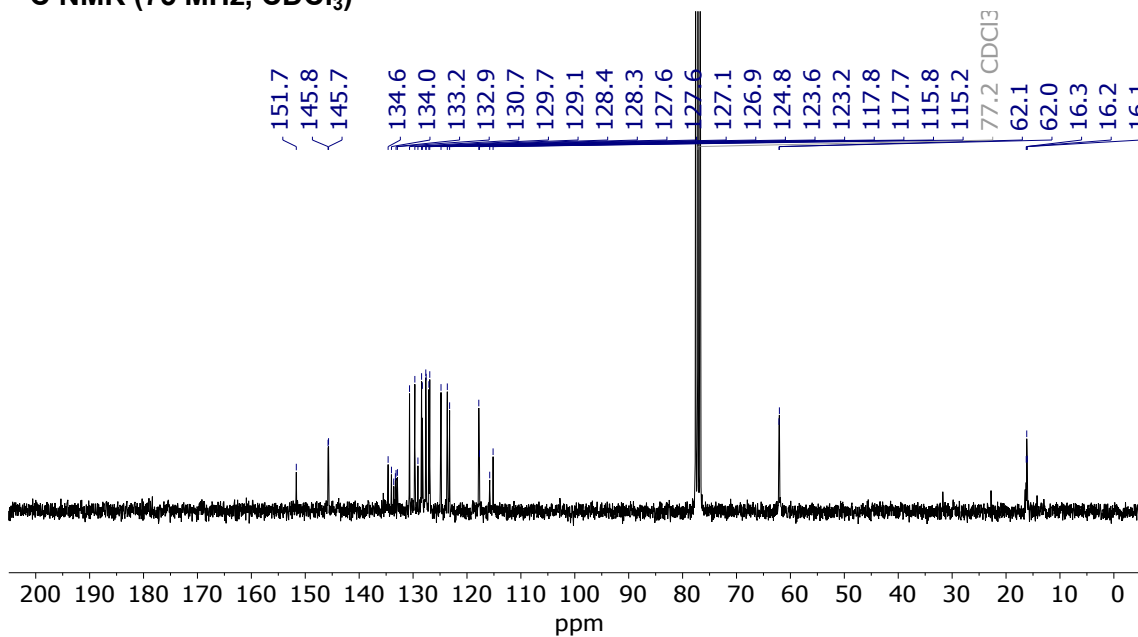

**<sup>1</sup>H NMR (300 MHz, CDCl<sub>3</sub>)**

8.02, 7.99, 7.94, 7.91, 7.89, 7.88, 7.87, 7.53, 7.51, 7.50, 7.49, 7.48, 7.38, 7.34, 7.34, 7.33, 7.32, 7.31, 7.30, 7.30, 7.29, 7.29, 7.28, 7.28, 7.22, 7.22, 7.20, 7.20, 7.19, 7.17, 6.92, 6.89, 6.76, 6.71, 5.69, 2.90, 2.84

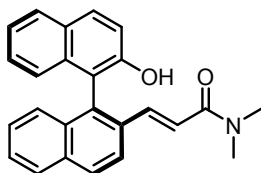

**3ad**

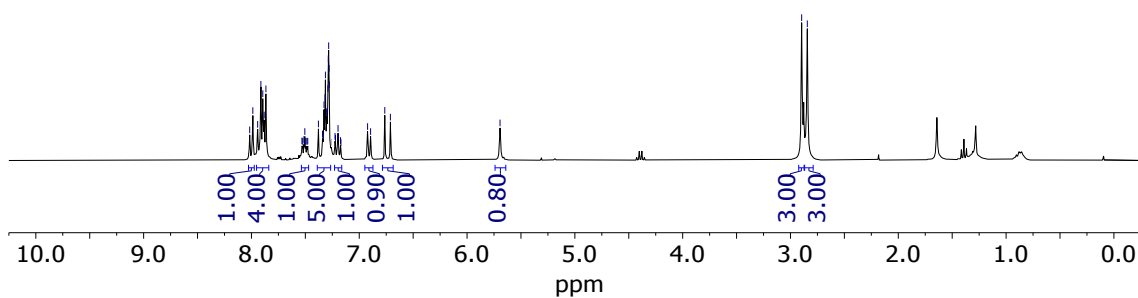

**DEPT-135**

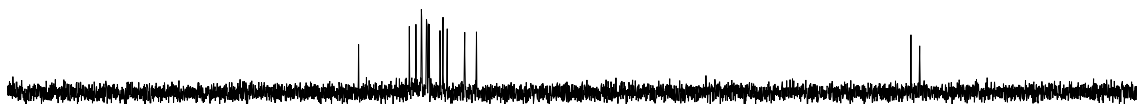

**<sup>13</sup>C NMR (75 MHz, CDCl<sub>3</sub>)**

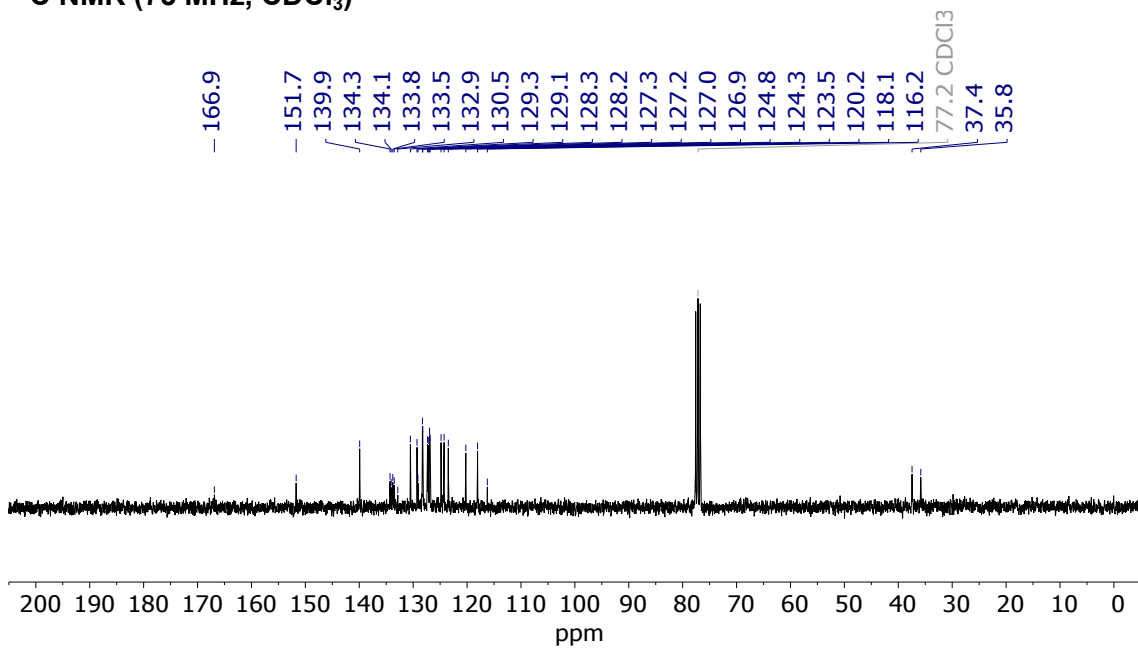

**<sup>1</sup>H NMR (300 MHz, CDCl<sub>3</sub>)**

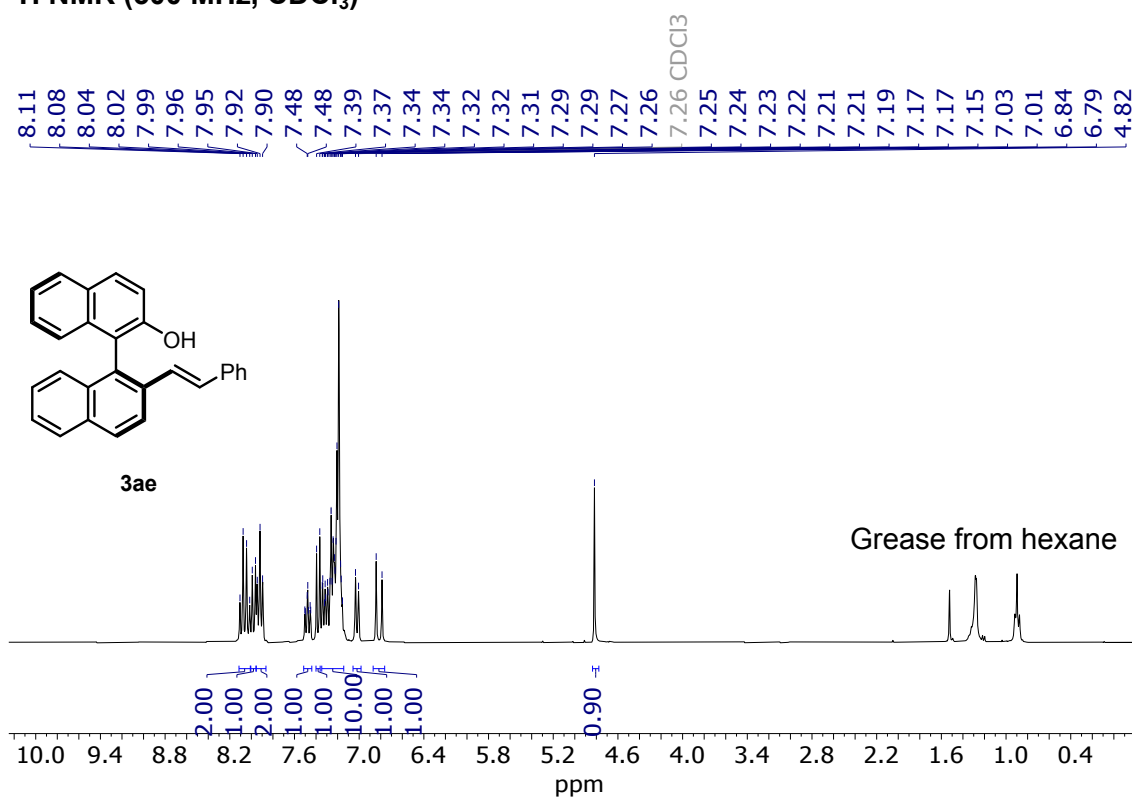

**DEPT-135**

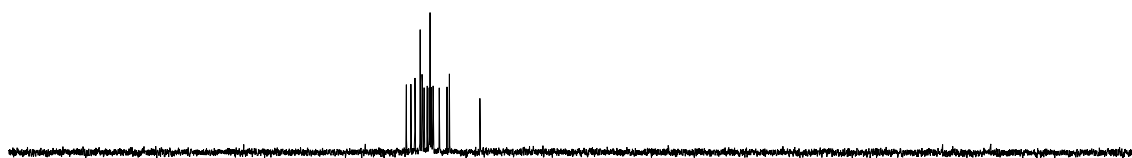

**<sup>13</sup>C NMR (75 MHz, CDCl<sub>3</sub>)**

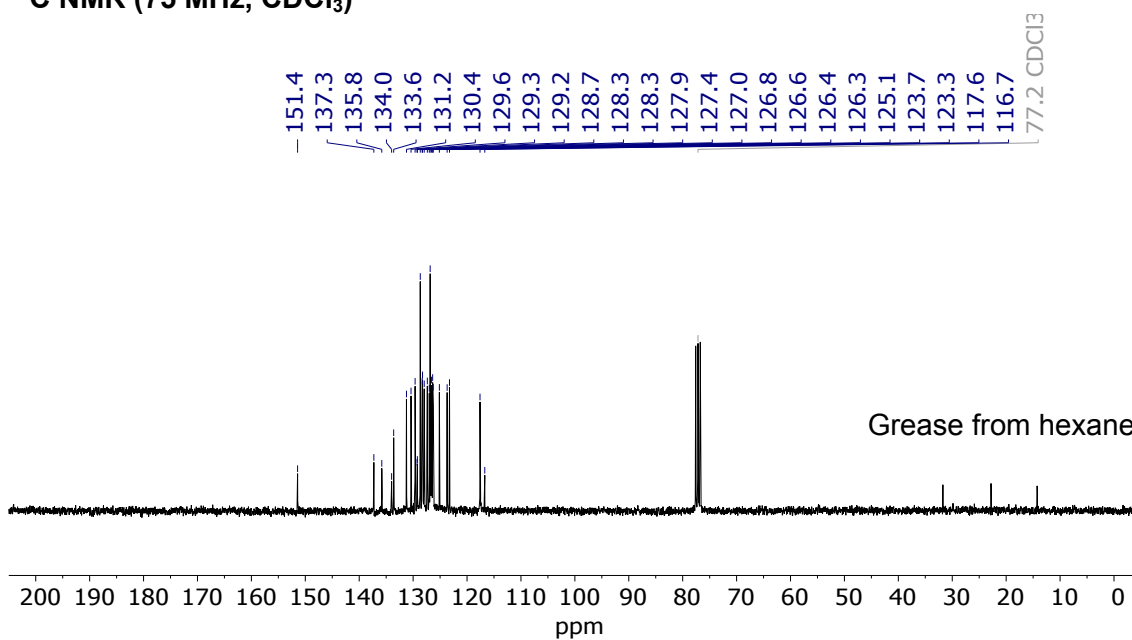

**<sup>1</sup>H NMR (300 MHz, CDCl<sub>3</sub>)**

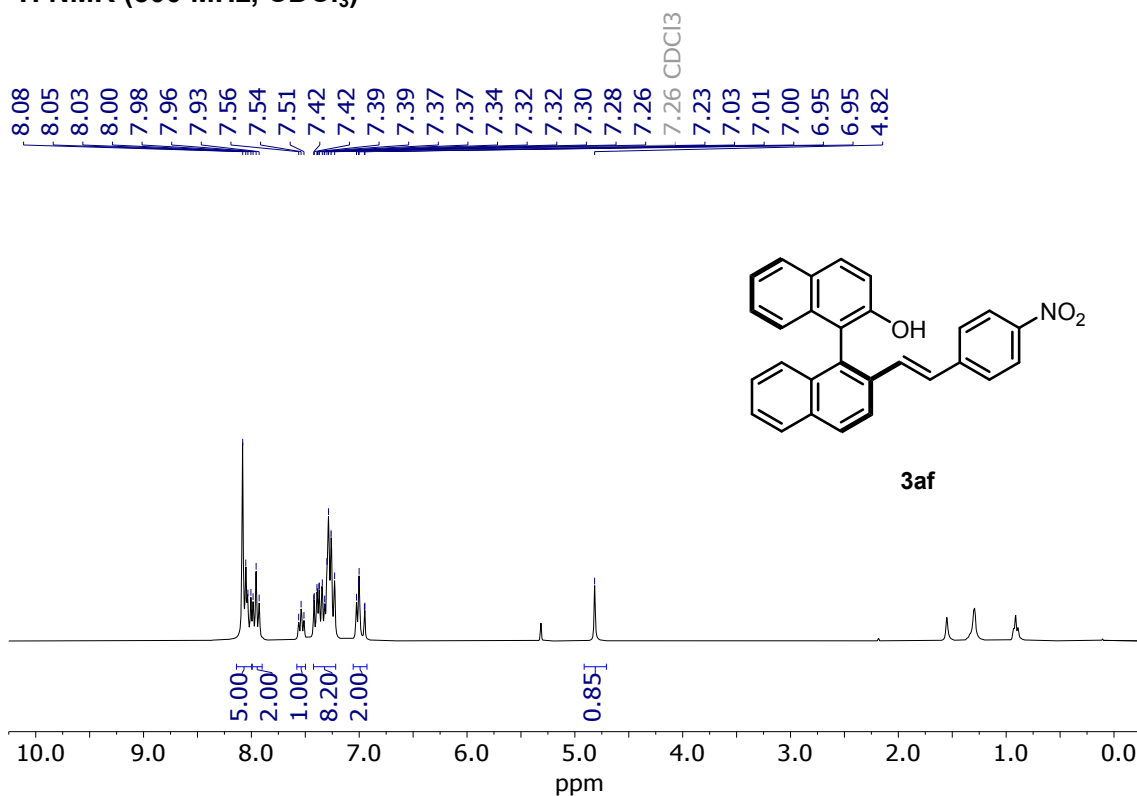

**DEPT-135**

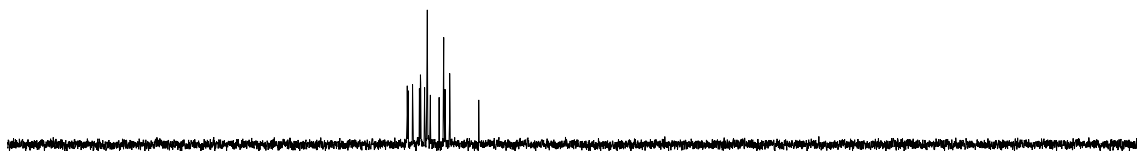

**<sup>13</sup>C NMR (75 MHz, CDCl<sub>3</sub>)**

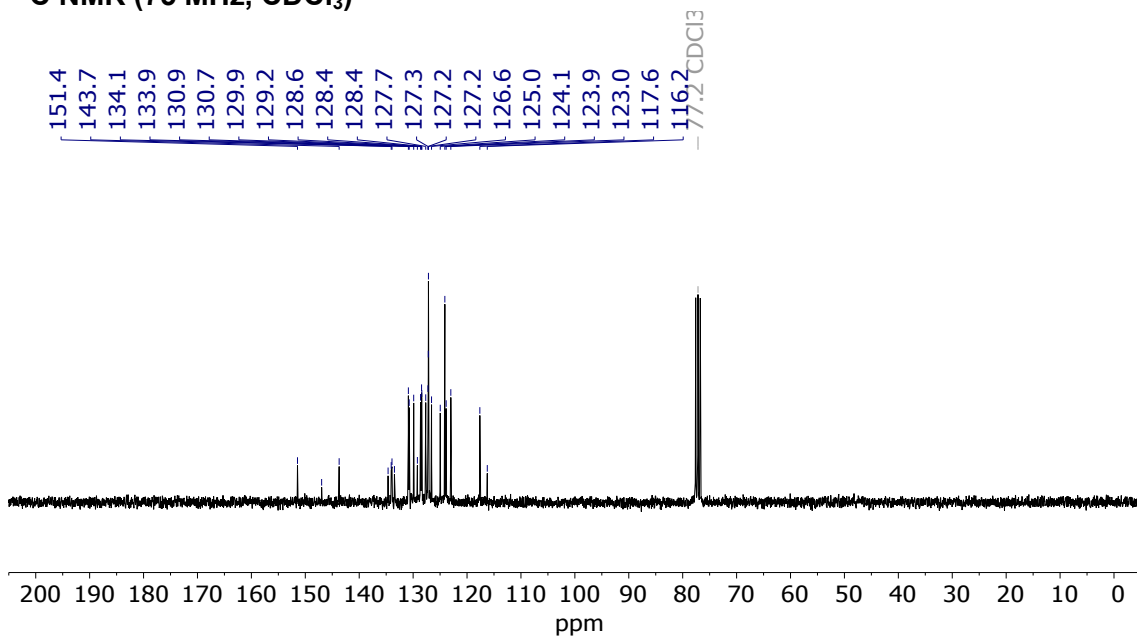

**<sup>1</sup>H NMR (300 MHz, CDCl<sub>3</sub>)**

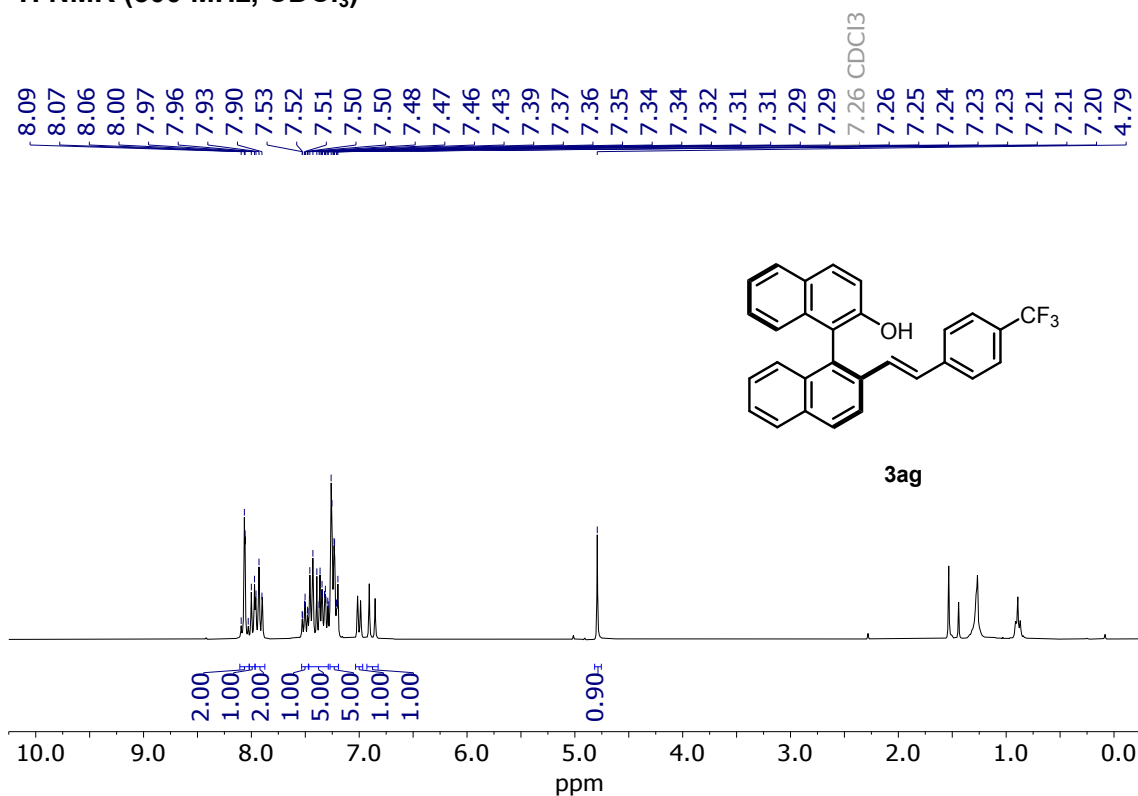

**DEPT-135**

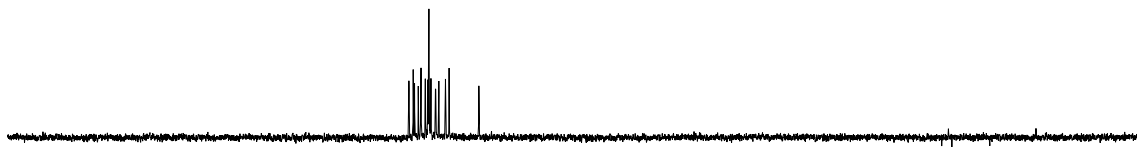

**<sup>13</sup>C NMR (75 MHz, CDCl<sub>3</sub>)**

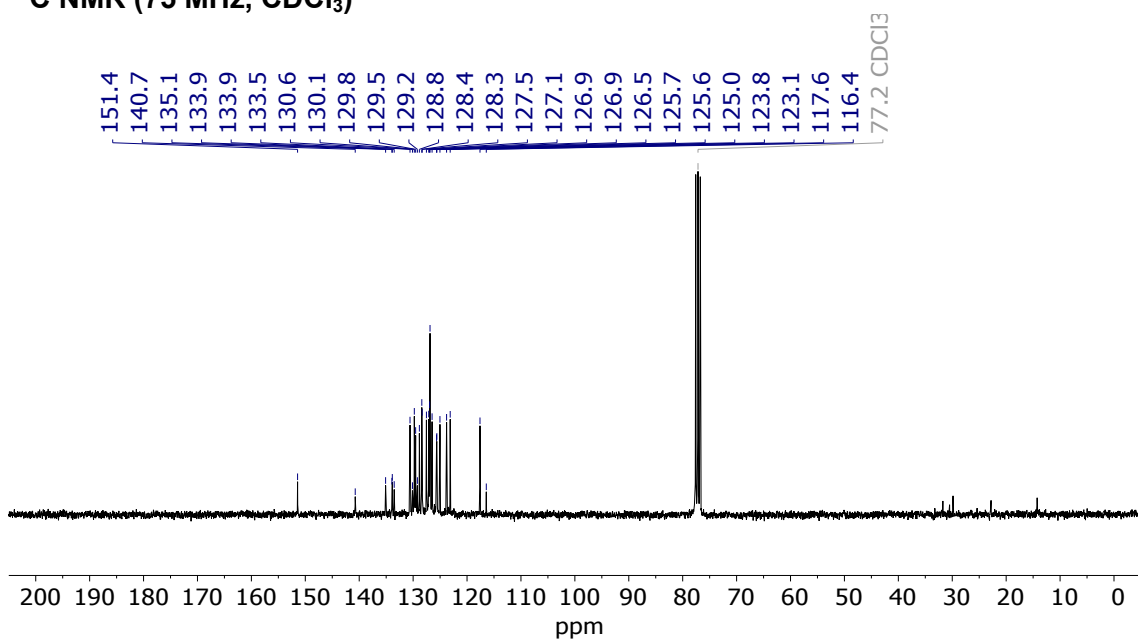

**<sup>1</sup>H NMR (300 MHz, CDCl<sub>3</sub>)**

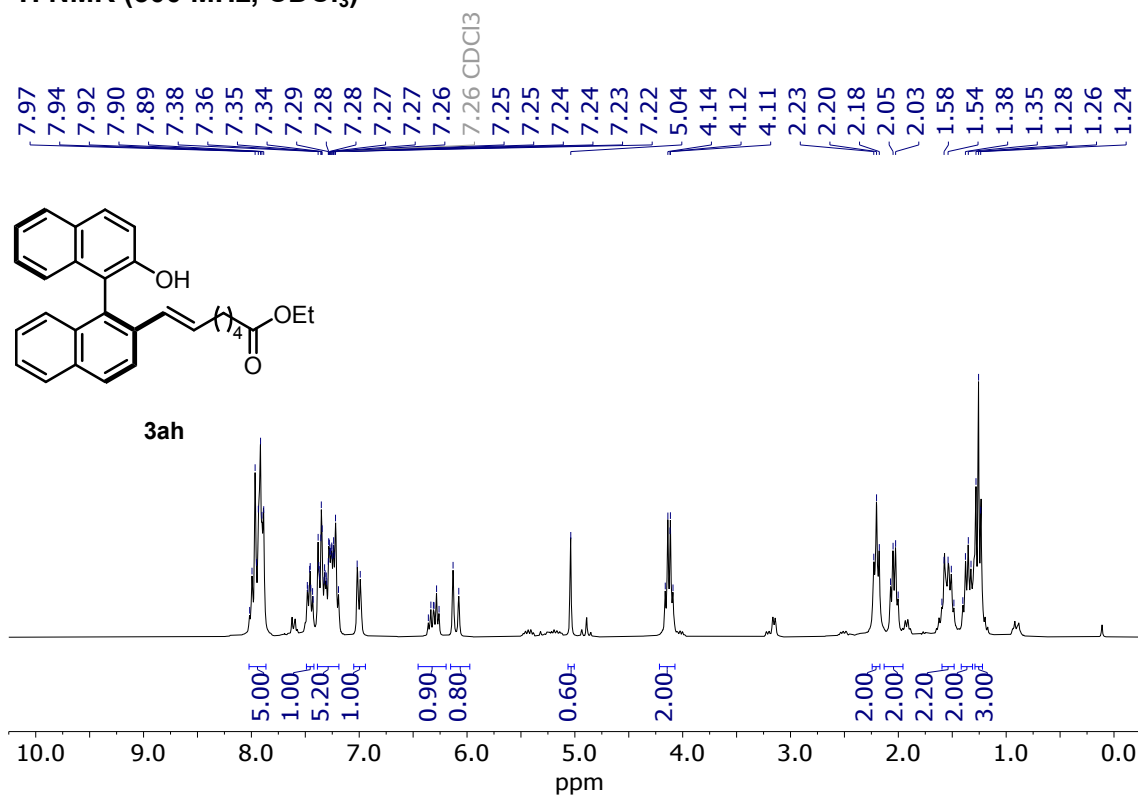

**DEPT-135**

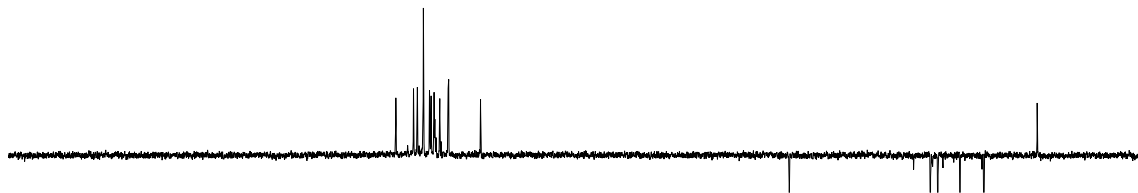

**<sup>13</sup>C NMR (75 MHz, CDCl<sub>3</sub>)**

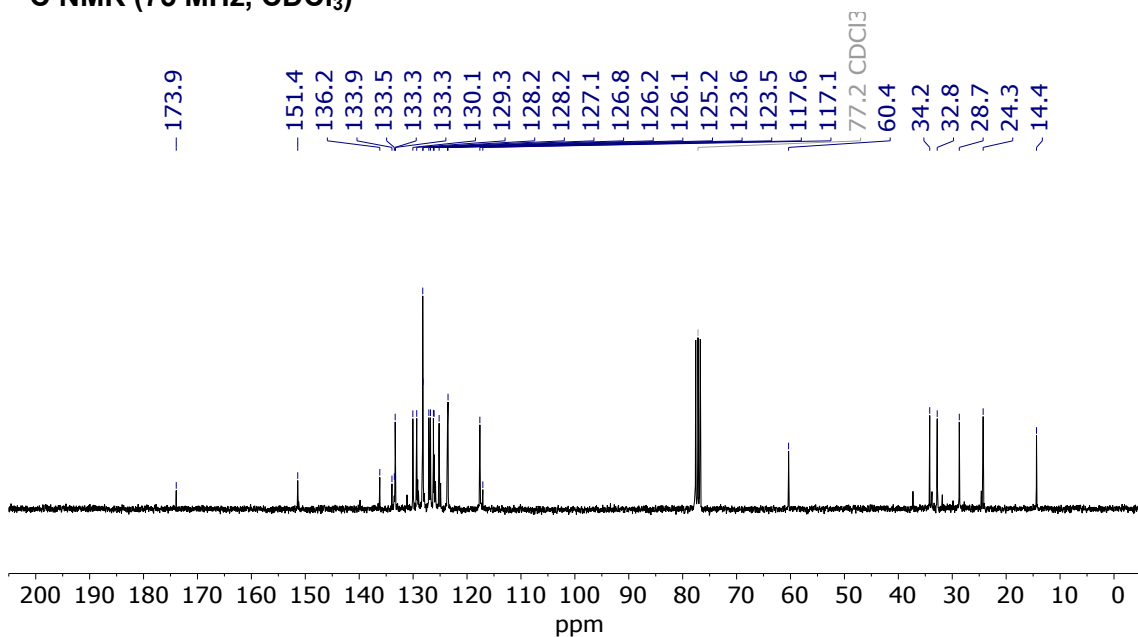



**<sup>1</sup>H NMR (300 MHz, CDCl<sub>3</sub>)**

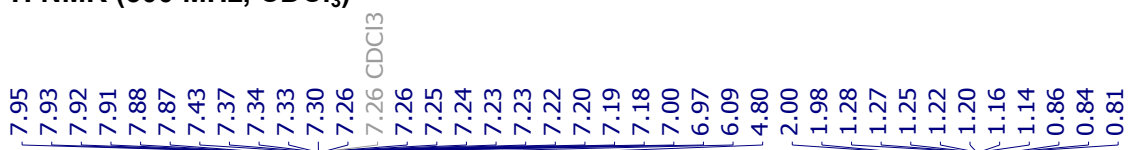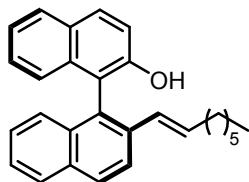

**3ai**

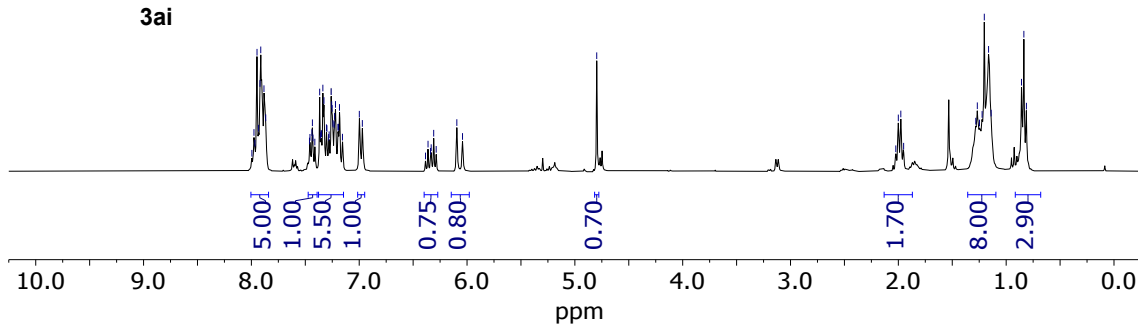

**DEPT-135**

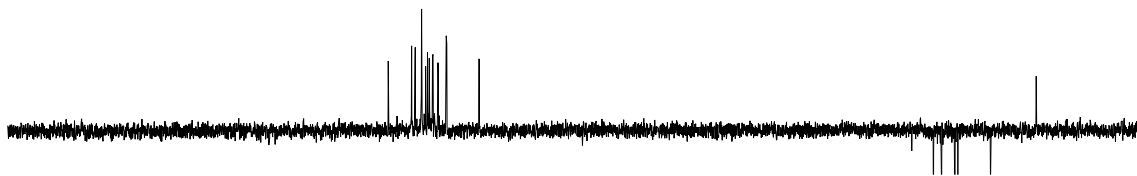

**<sup>13</sup>C NMR (75 MHz, CDCl<sub>3</sub>)**

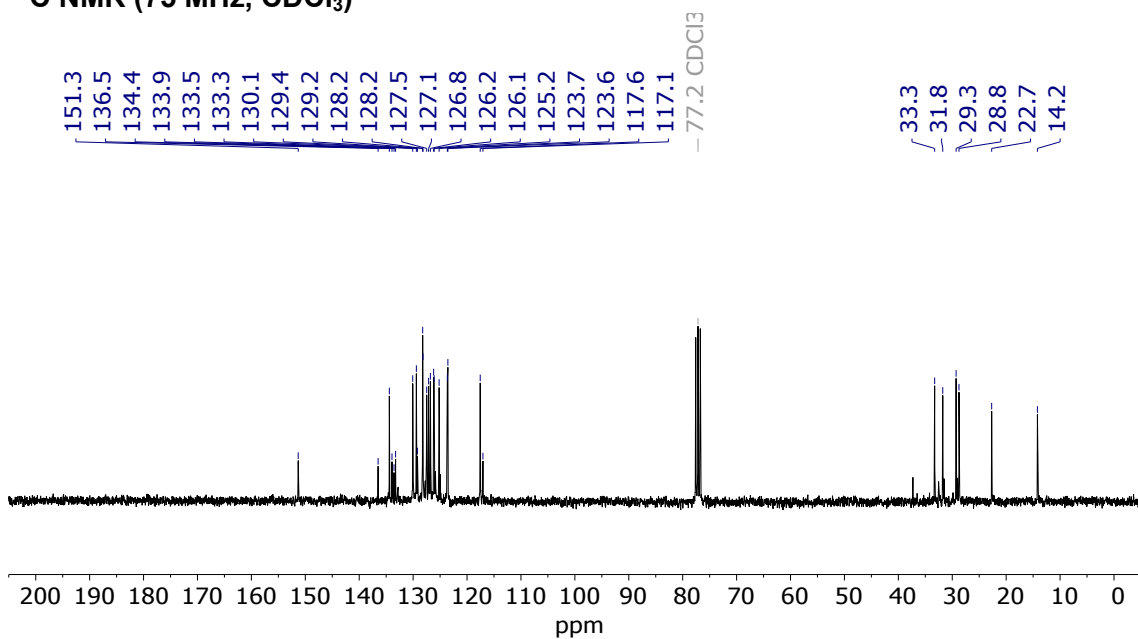

**<sup>1</sup>H NMR (300 MHz, CDCl<sub>3</sub>)**

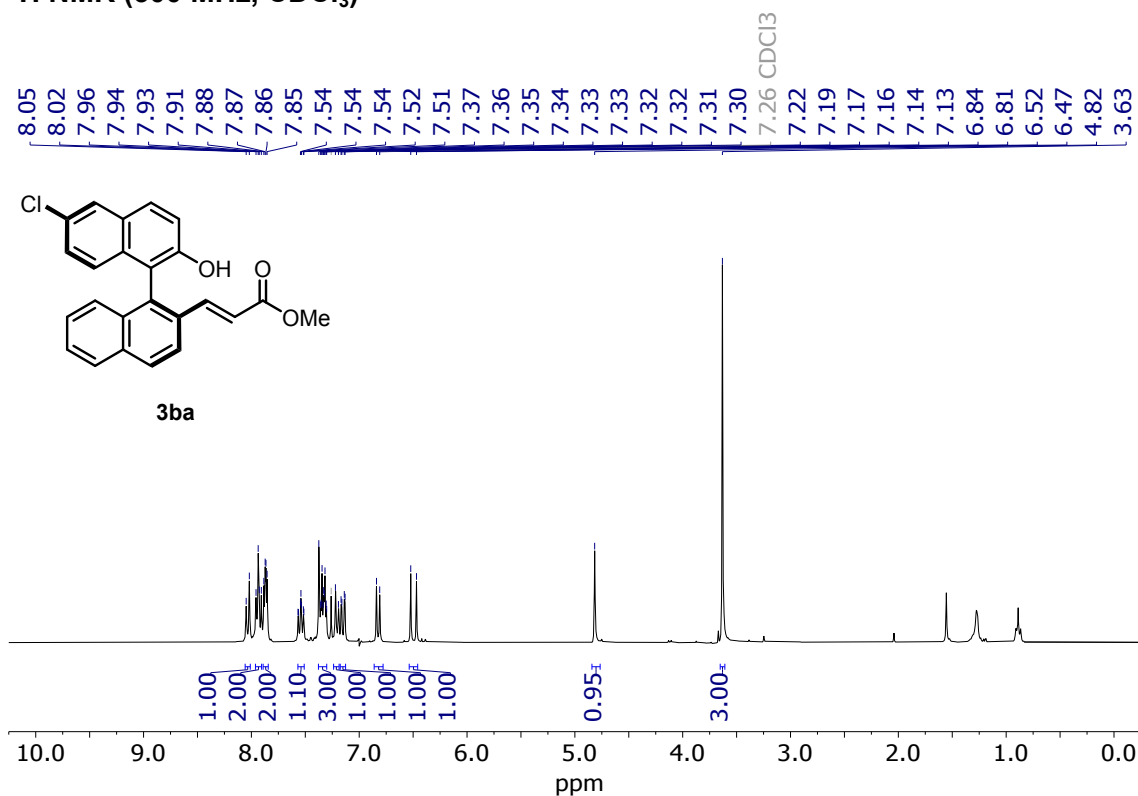

**DEPT-135**

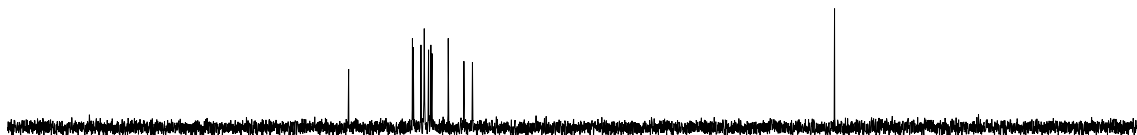

**<sup>13</sup>C NMR (75 MHz, CDCl<sub>3</sub>)**

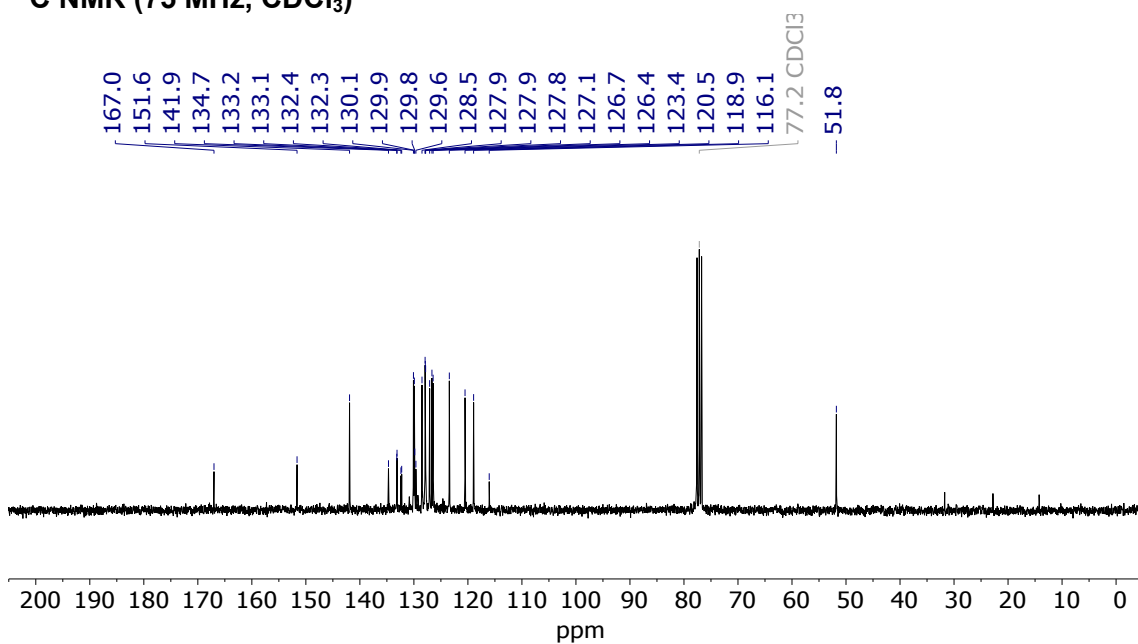

**<sup>1</sup>H NMR (300 MHz, DMSO-d<sub>6</sub>)**

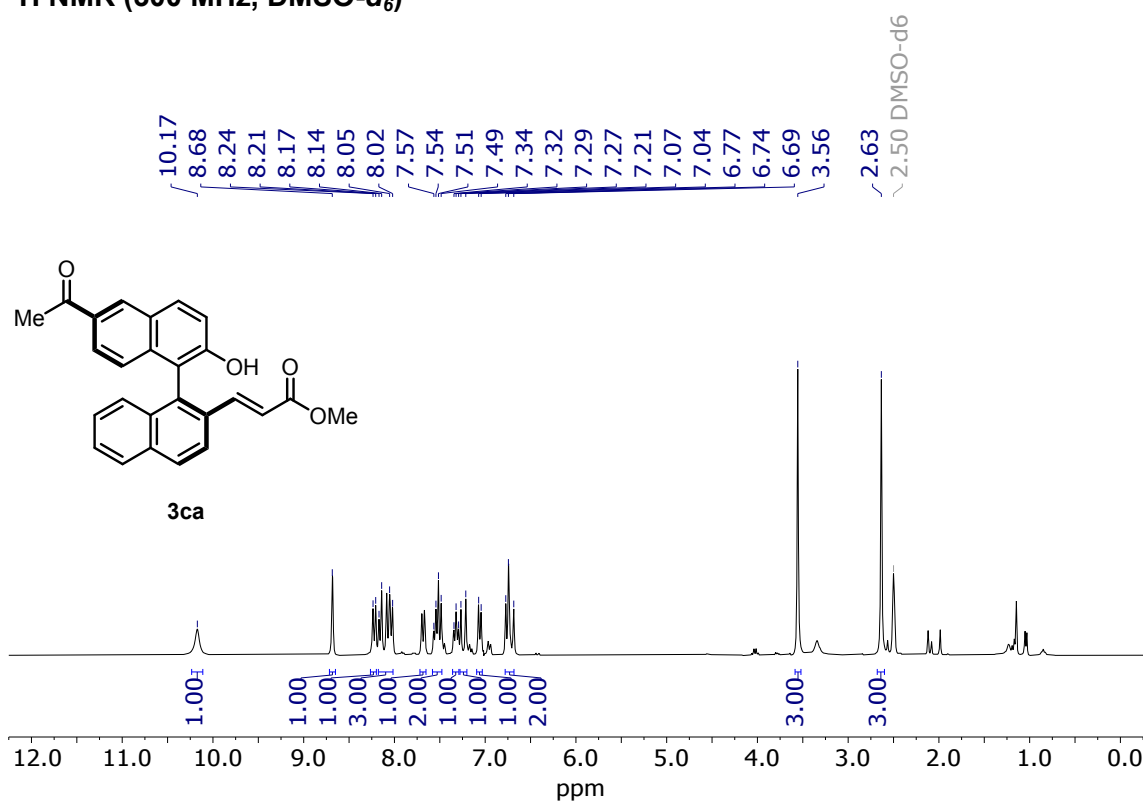

**DEPT-135**

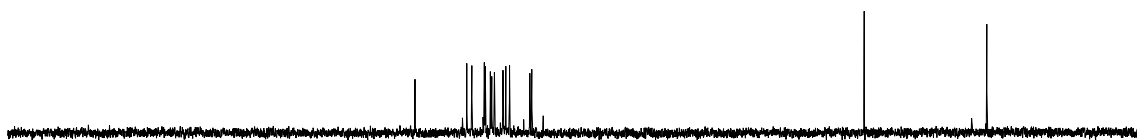

**<sup>13</sup>C NMR (75 MHz, DMSO-d<sub>6</sub>)**

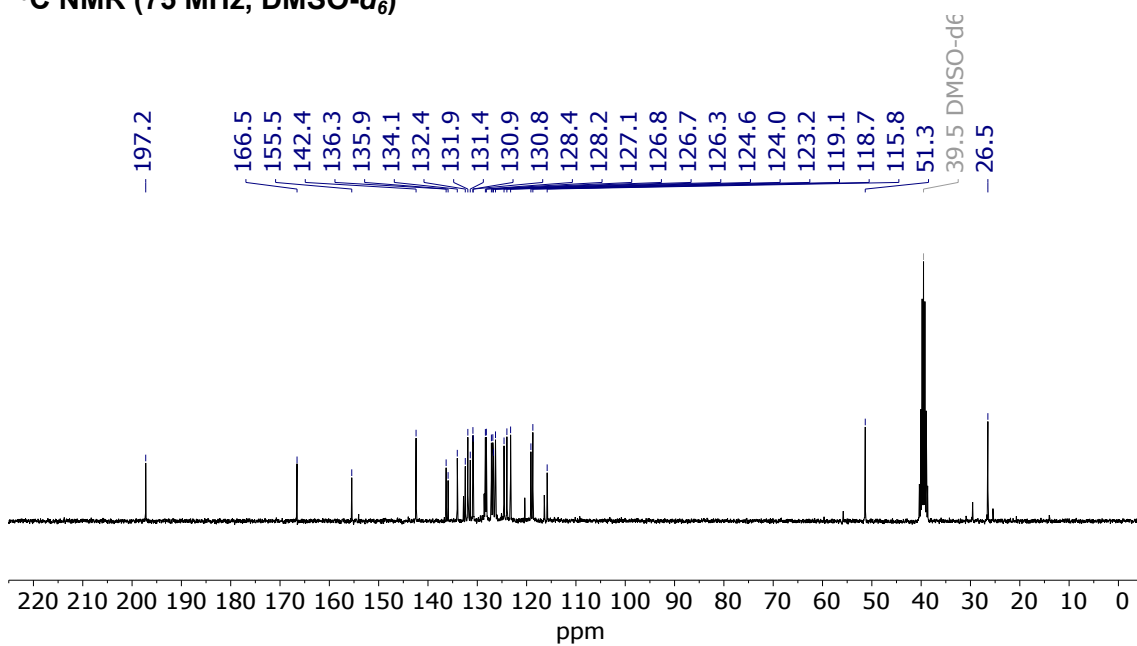

**<sup>1</sup>H NMR (300 MHz, CDCl<sub>3</sub>)**

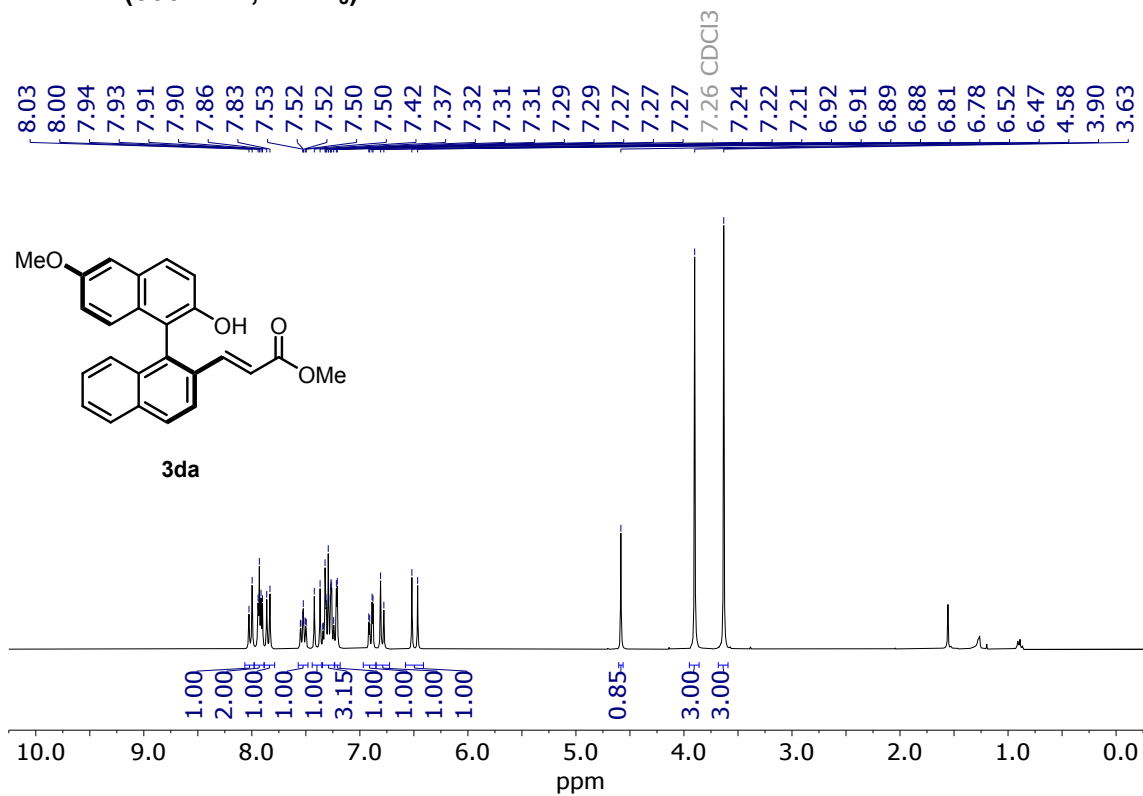

**DEPT-135**

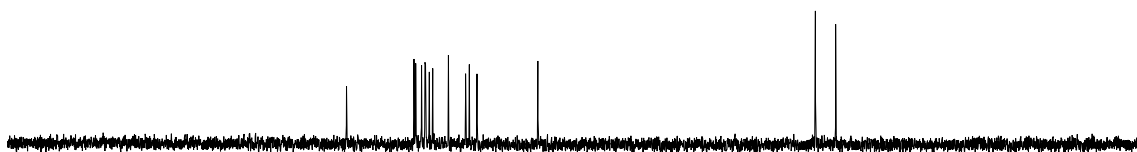

**<sup>13</sup>C NMR (75 MHz, CDCl<sub>3</sub>)**

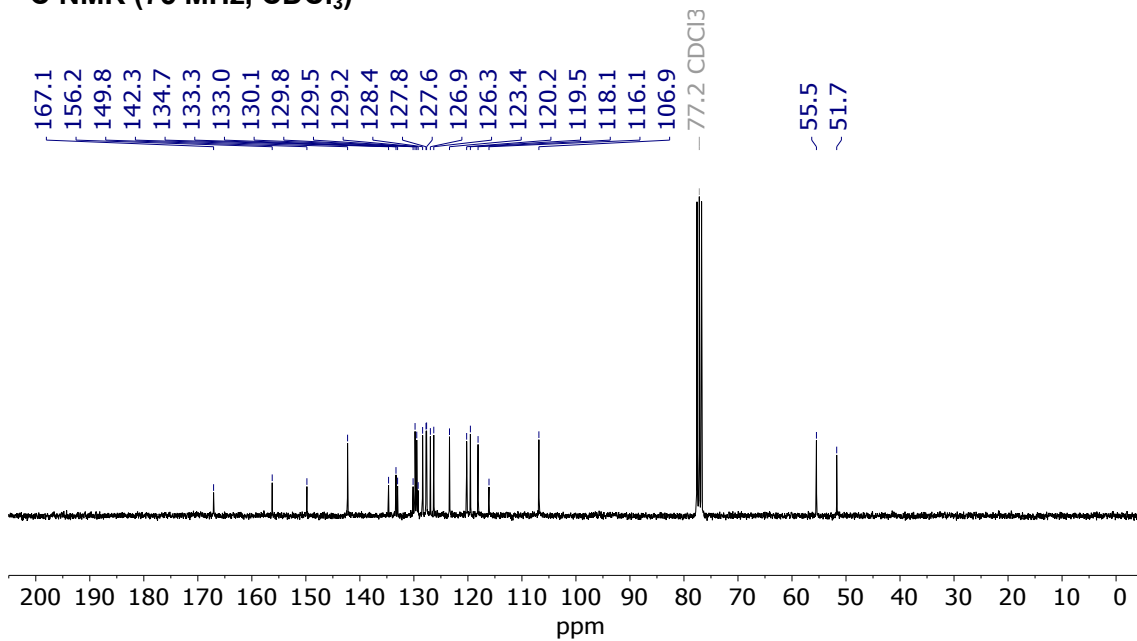

**<sup>1</sup>H NMR (300 MHz, CDCl<sub>3</sub>)**

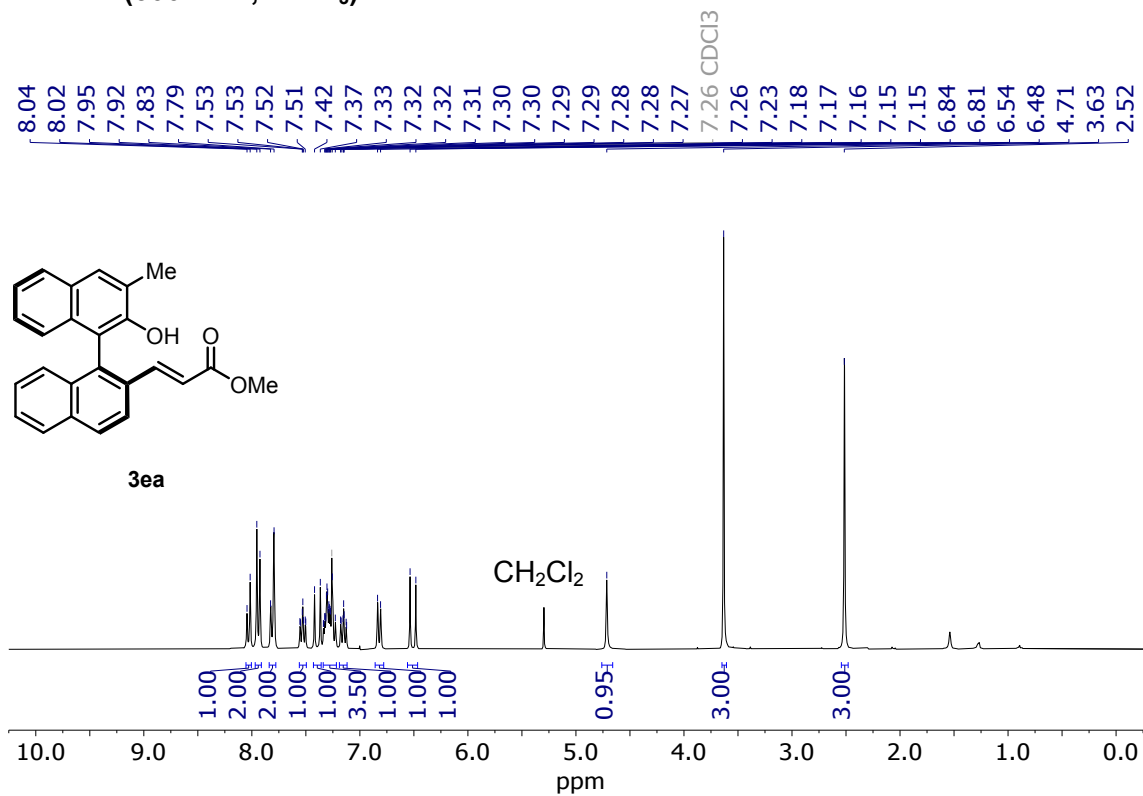

**DEPT-135**

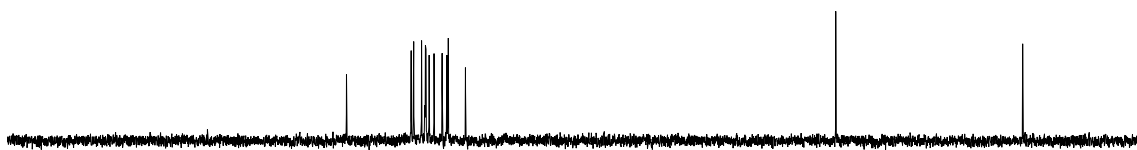

**<sup>13</sup>C NMR (75 MHz, CDCl<sub>3</sub>)**

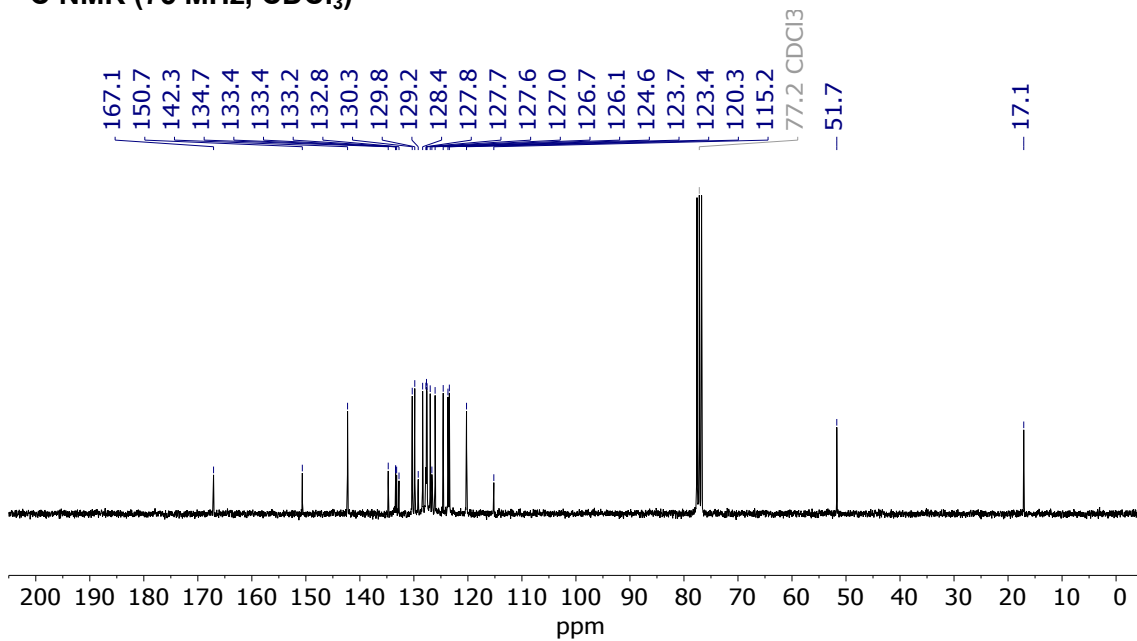

**<sup>1</sup>H NMR (300 MHz, CDCl<sub>3</sub>)**

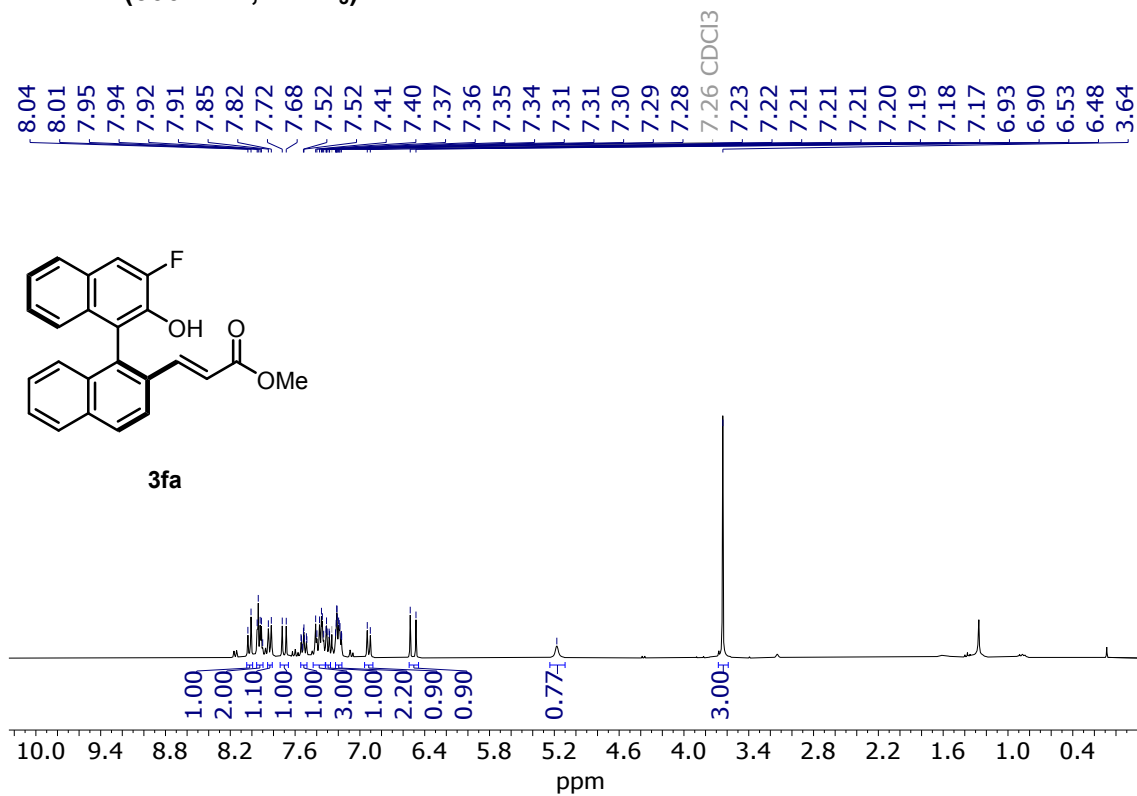

**DEPT-135**

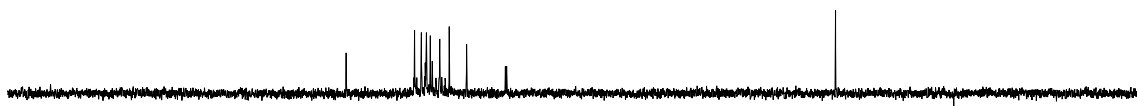

**<sup>13</sup>C NMR (75 MHz, CDCl<sub>3</sub>)**

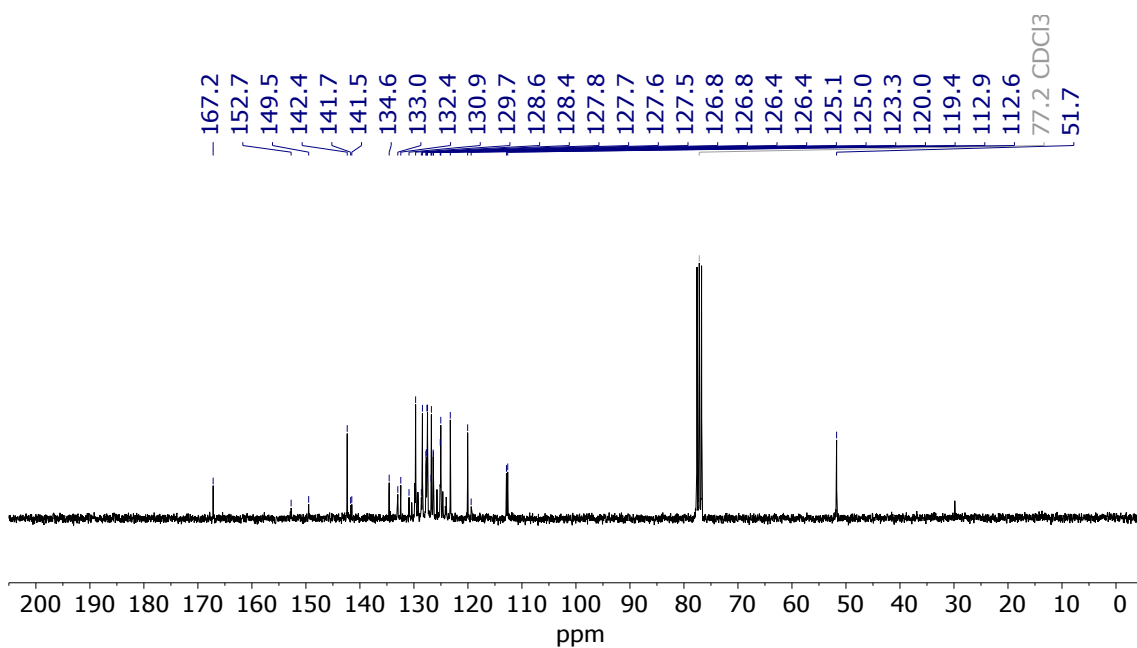

**<sup>1</sup>H NMR (300 MHz, CDCl<sub>3</sub>)**

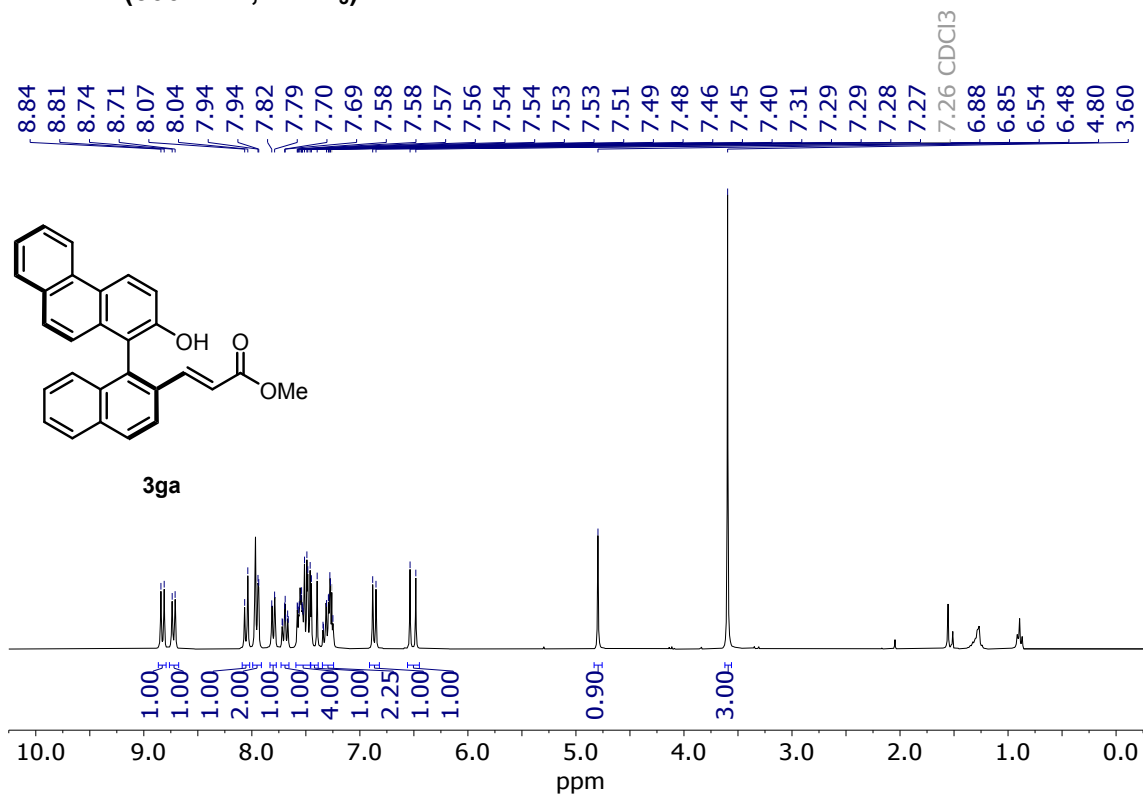

**DEPT-135**

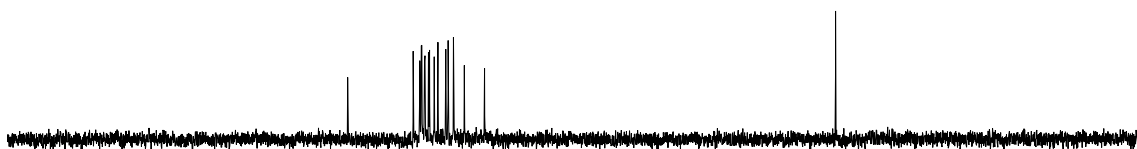

**<sup>13</sup>C NMR (75 MHz, CDCl<sub>3</sub>)**

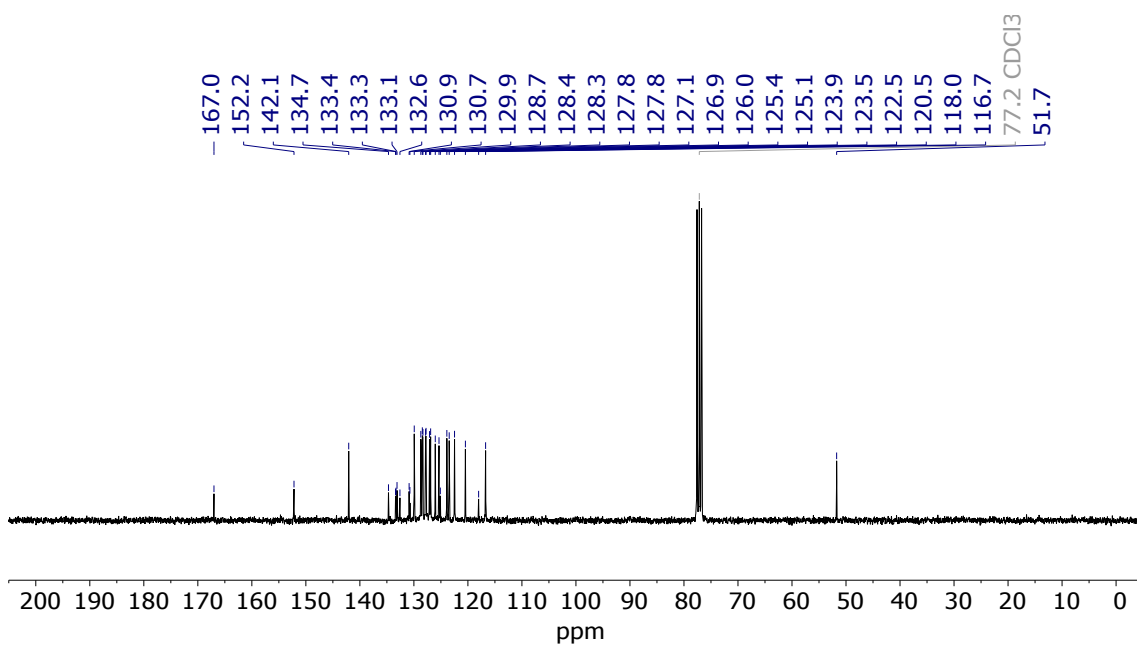

**<sup>1</sup>H NMR (500 MHz, CDCl<sub>3</sub>)**

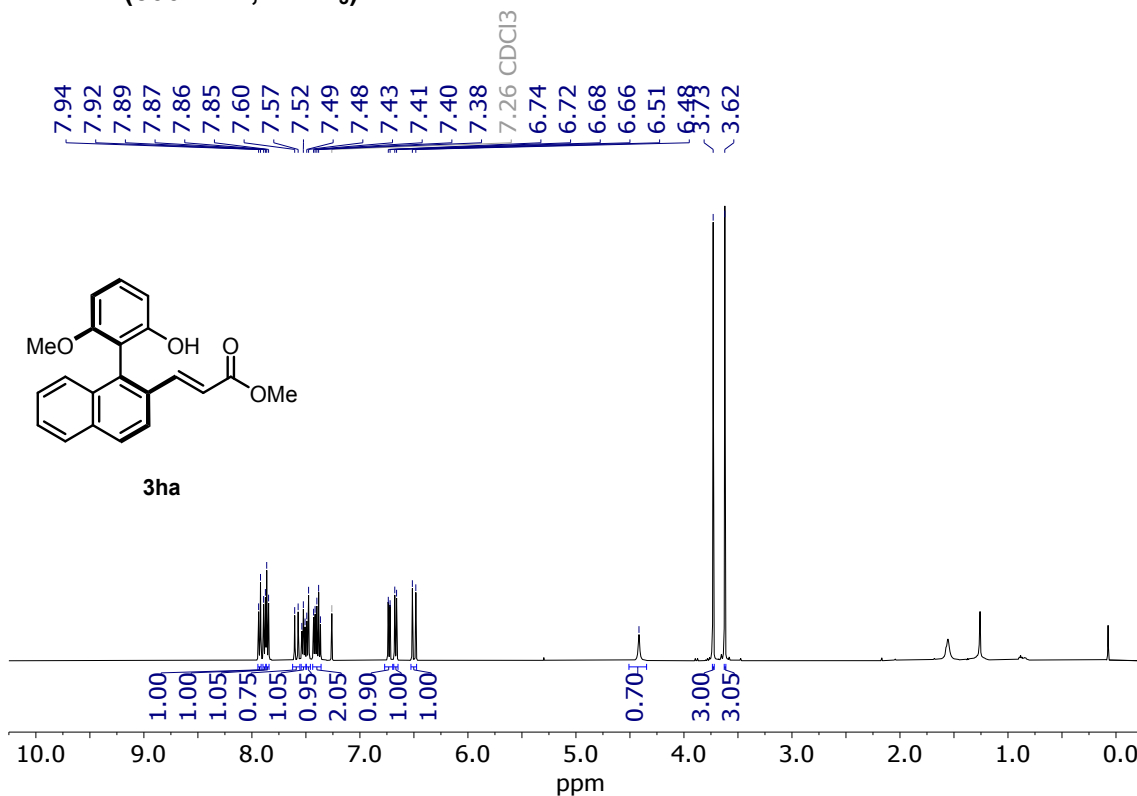

**DEPT-135**

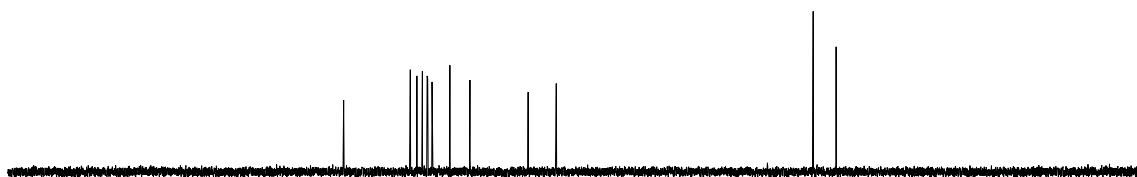

**<sup>13</sup>C NMR (126 MHz, CDCl<sub>3</sub>)**

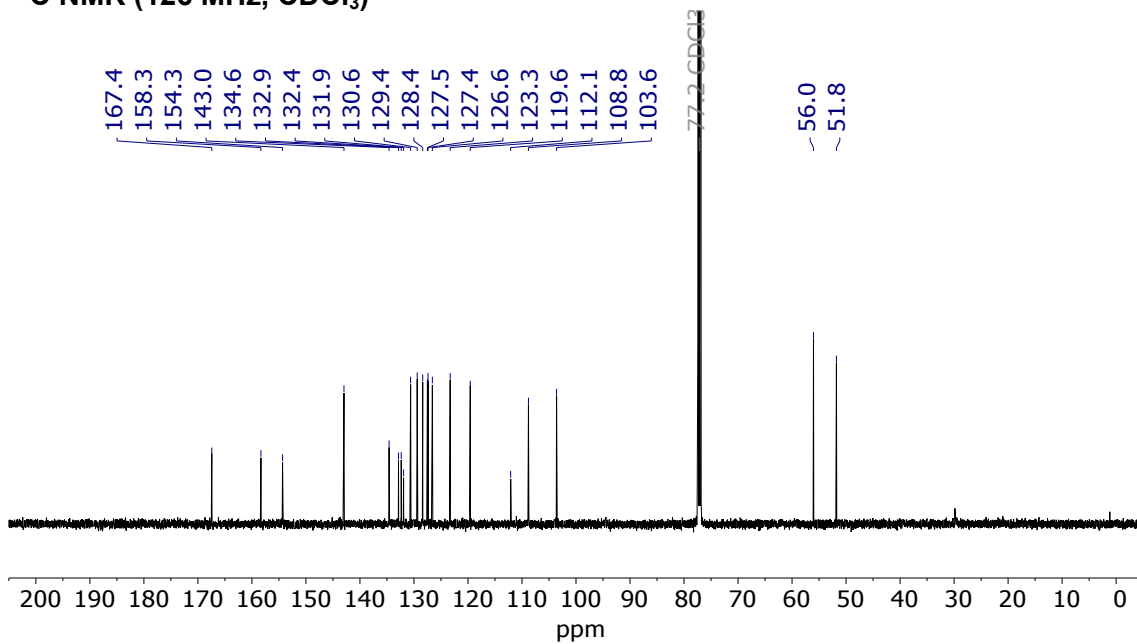



**<sup>1</sup>H NMR (300 MHz, CDCl<sub>3</sub>)**

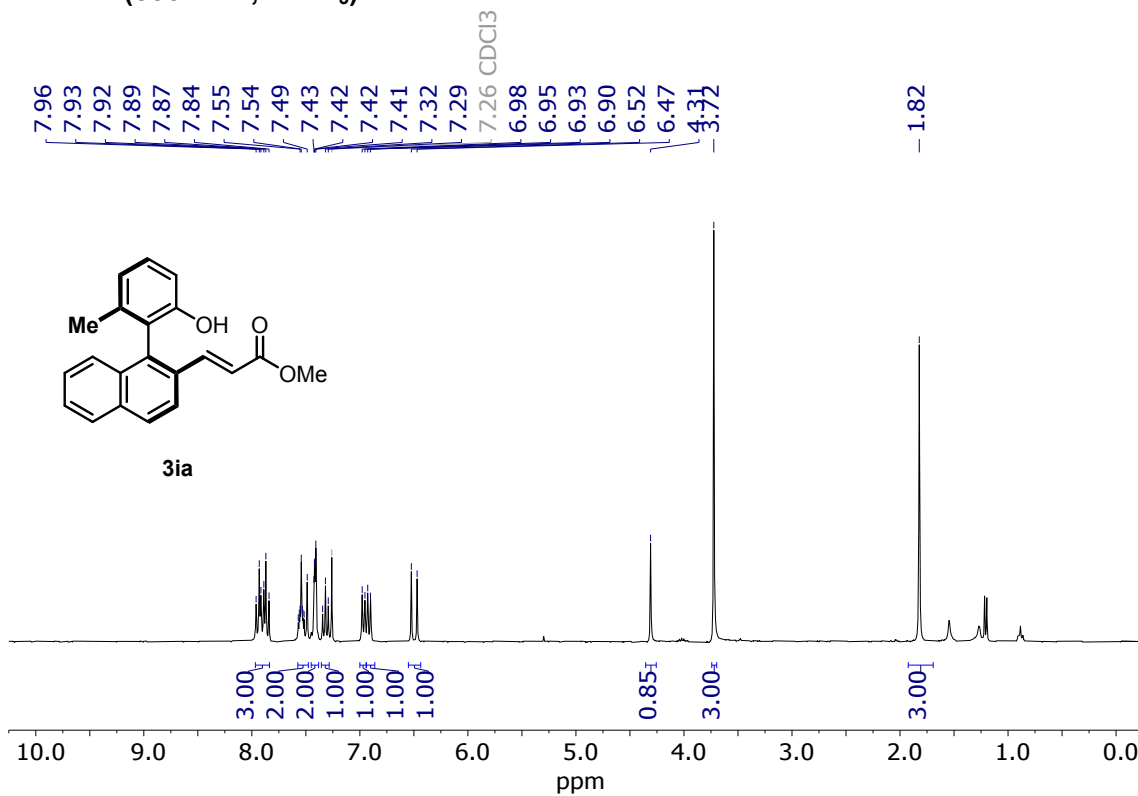

**DEPT-135**

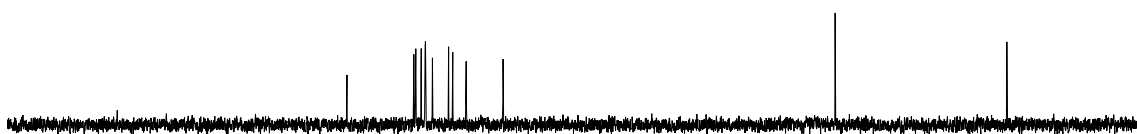

**<sup>13</sup>C NMR (75 MHz, CDCl<sub>3</sub>)**

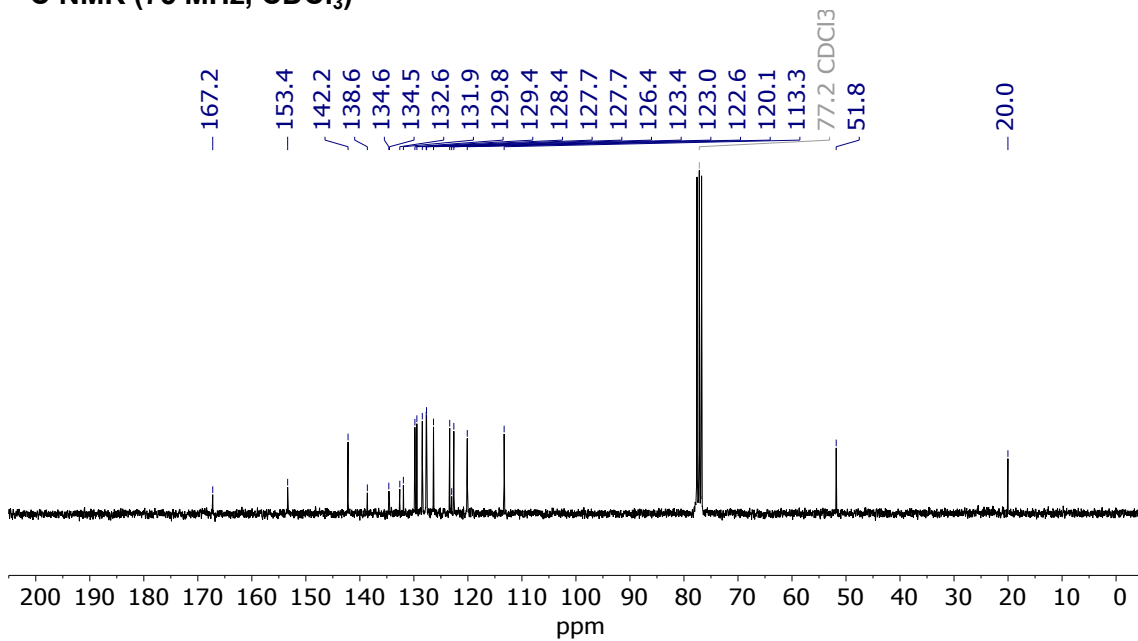

**<sup>1</sup>H NMR (500 MHz, CDCl<sub>3</sub>)**

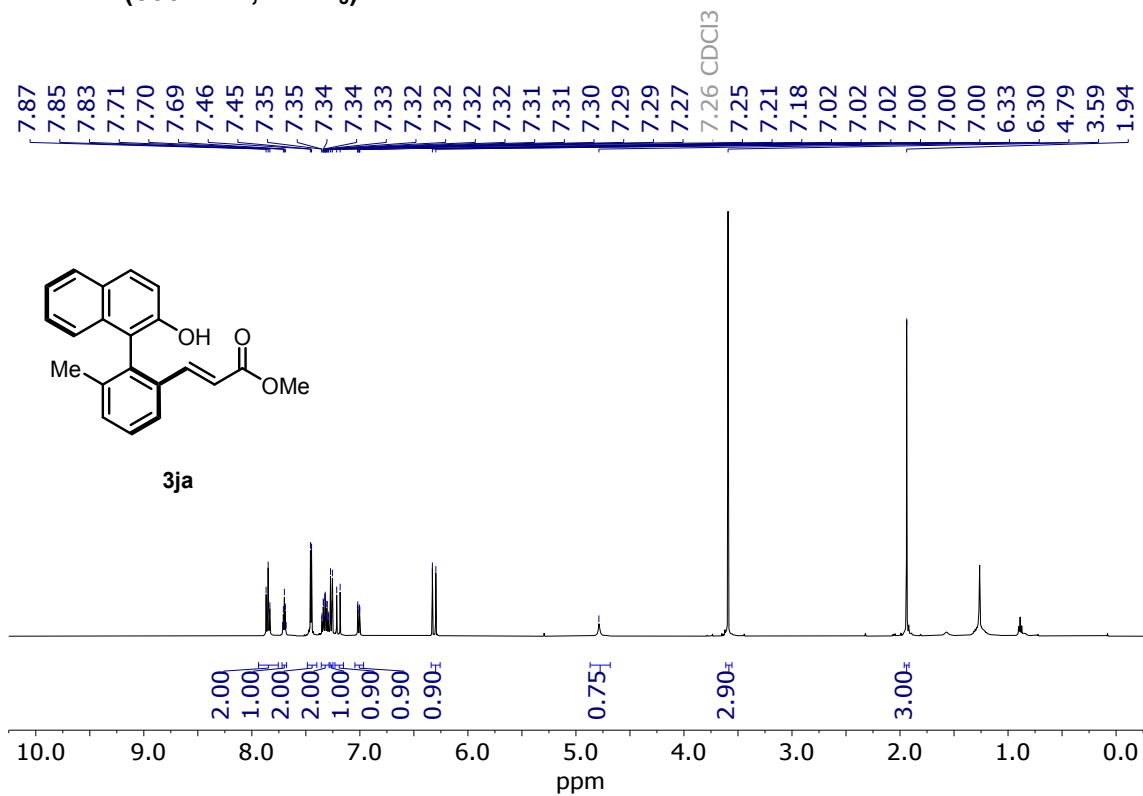

**DEPT-135**

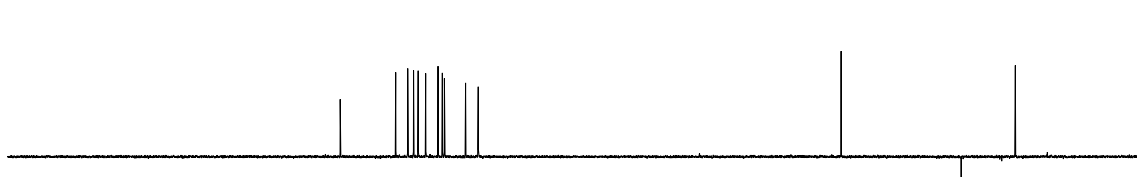

**<sup>13</sup>C NMR (126 MHz, CDCl<sub>3</sub>)**

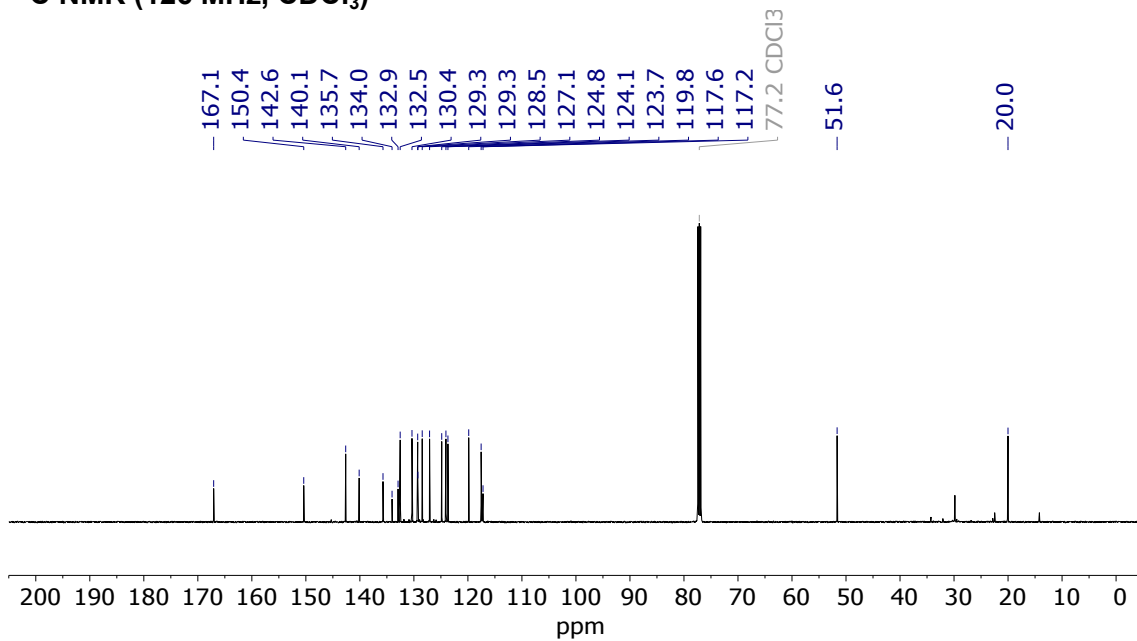

**<sup>1</sup>H NMR (300 MHz, CDCl<sub>3</sub>)**

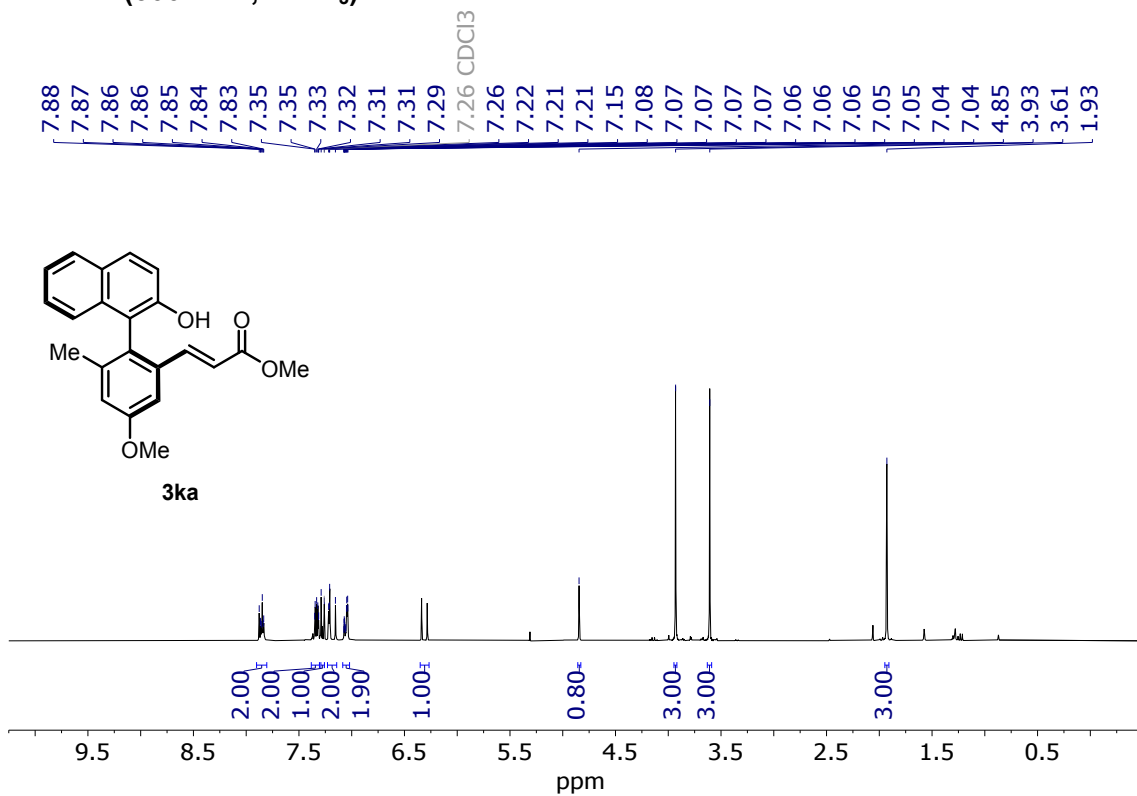

**DEPT-135**

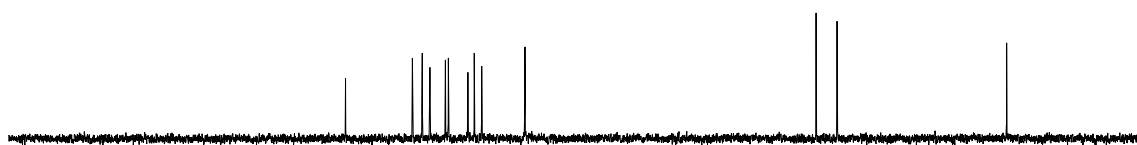

**<sup>13</sup>C NMR (75 MHz, CDCl<sub>3</sub>)**

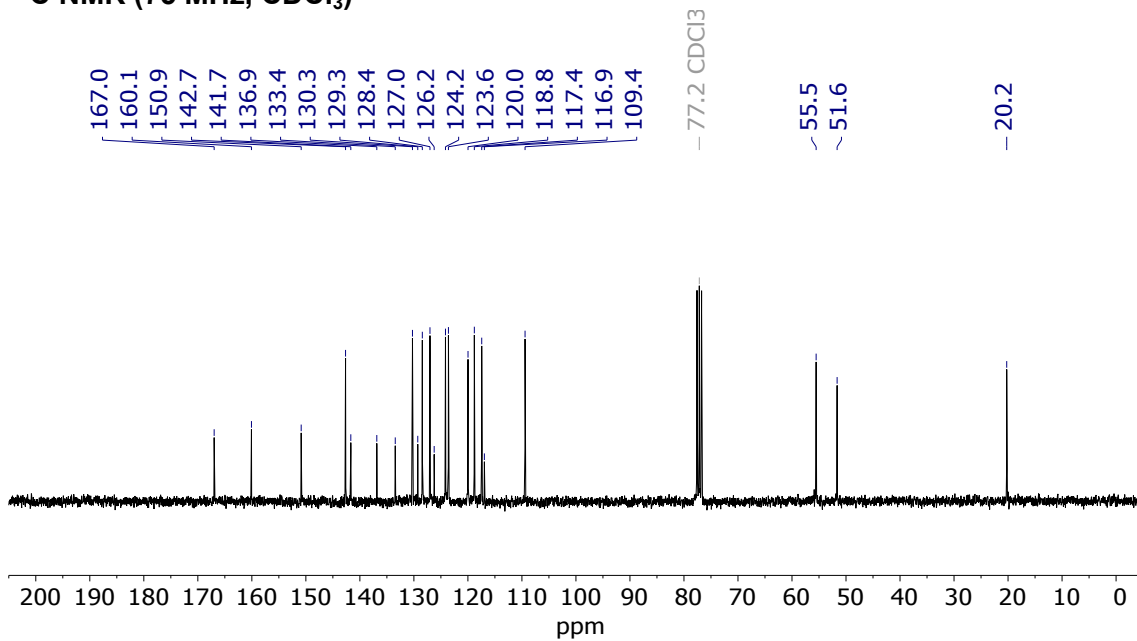

**<sup>1</sup>H NMR (300 MHz, CDCl<sub>3</sub>)**

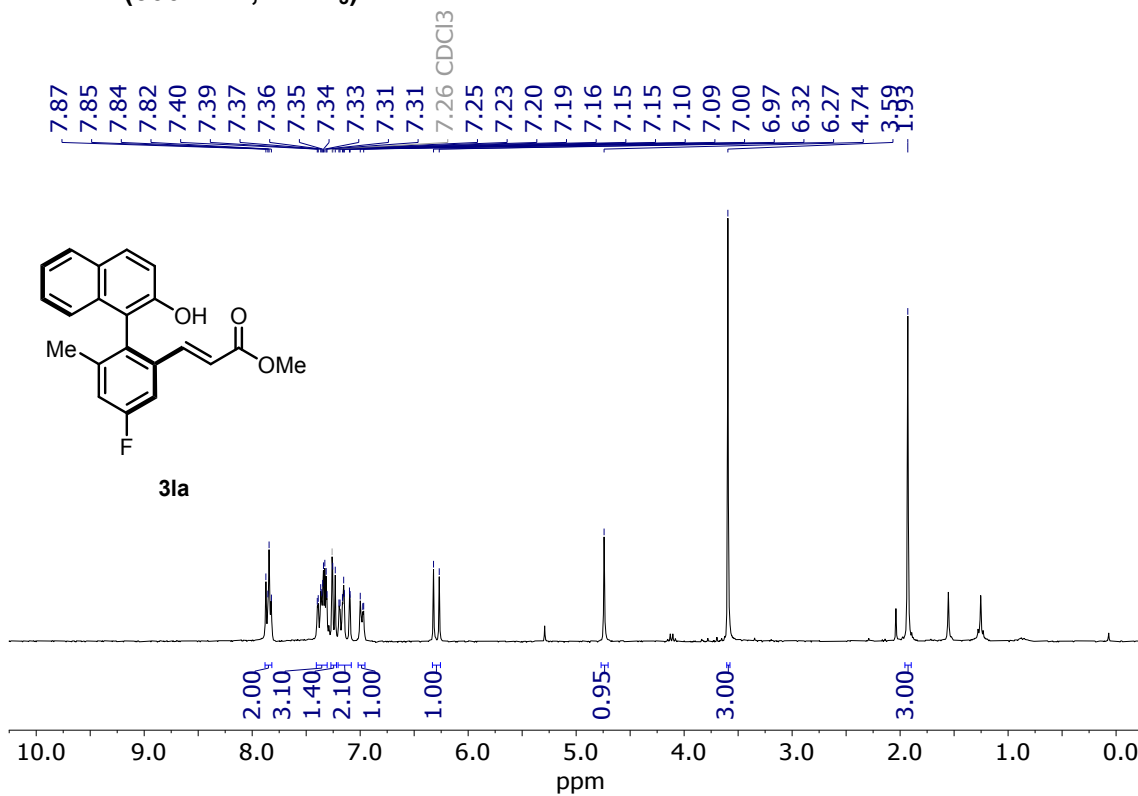

**DEPT-135**

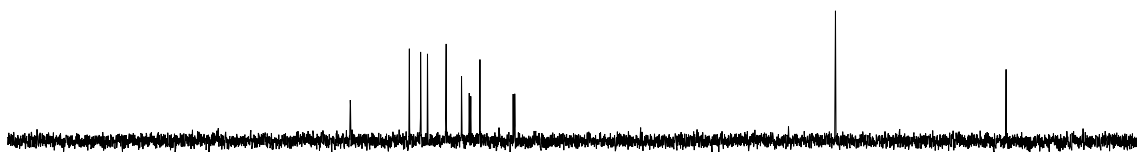

**<sup>13</sup>C NMR (75 MHz, CDCl<sub>3</sub>)**

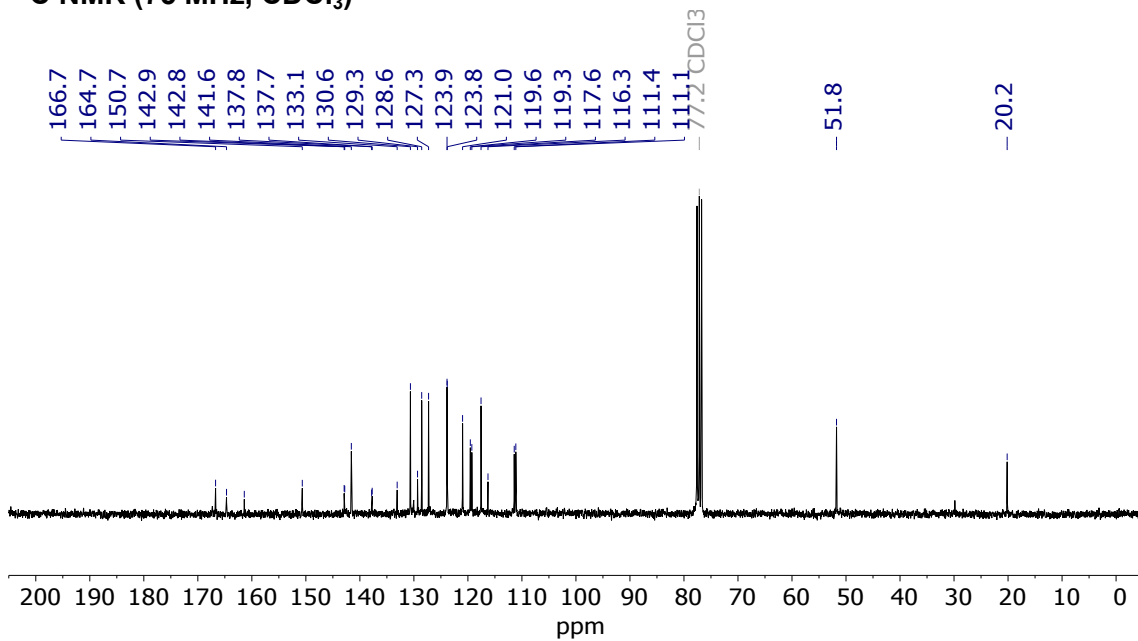

**<sup>1</sup>H NMR (500 MHz, CDCl<sub>3</sub>)**

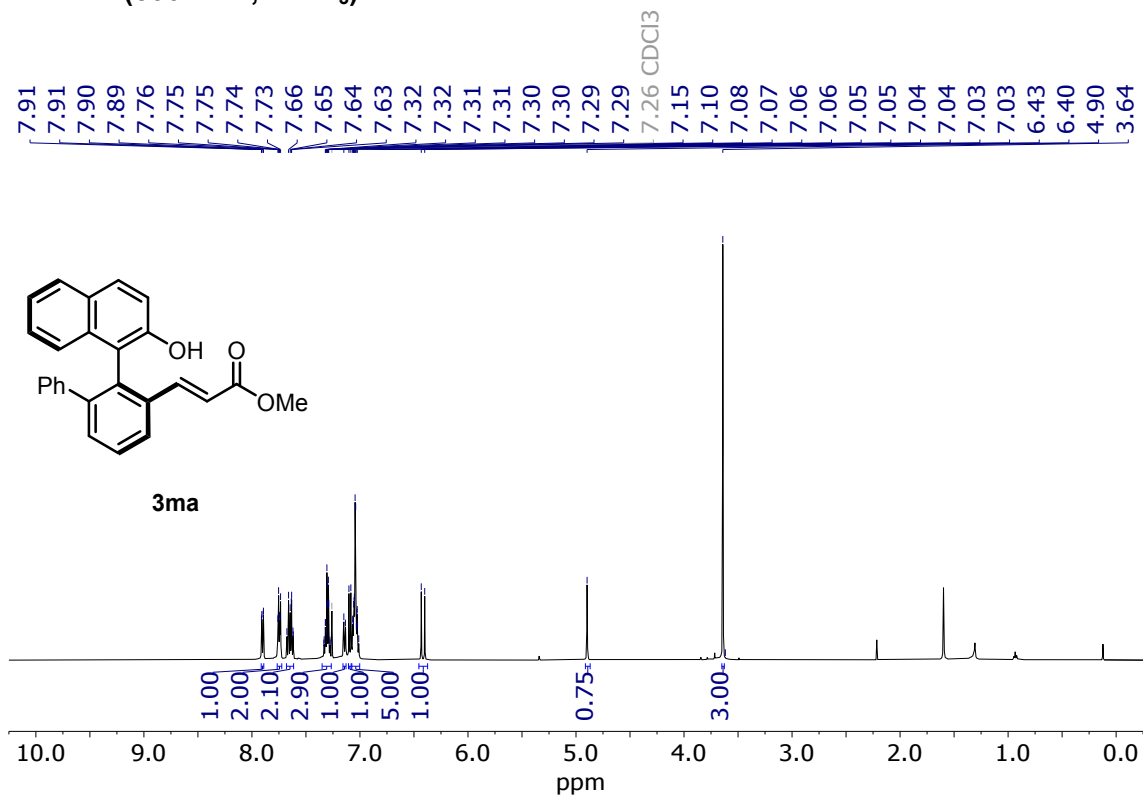

**DEPT-135**

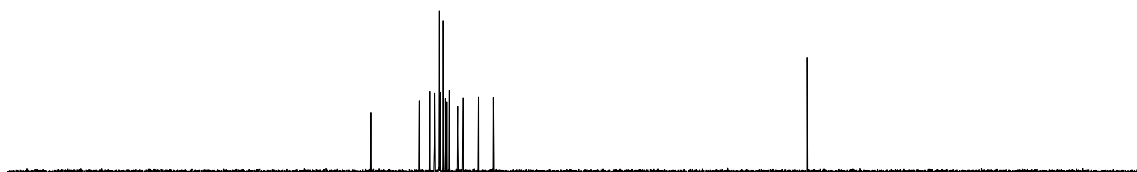

**<sup>13</sup>C NMR (126 MHz, CDCl<sub>3</sub>)**

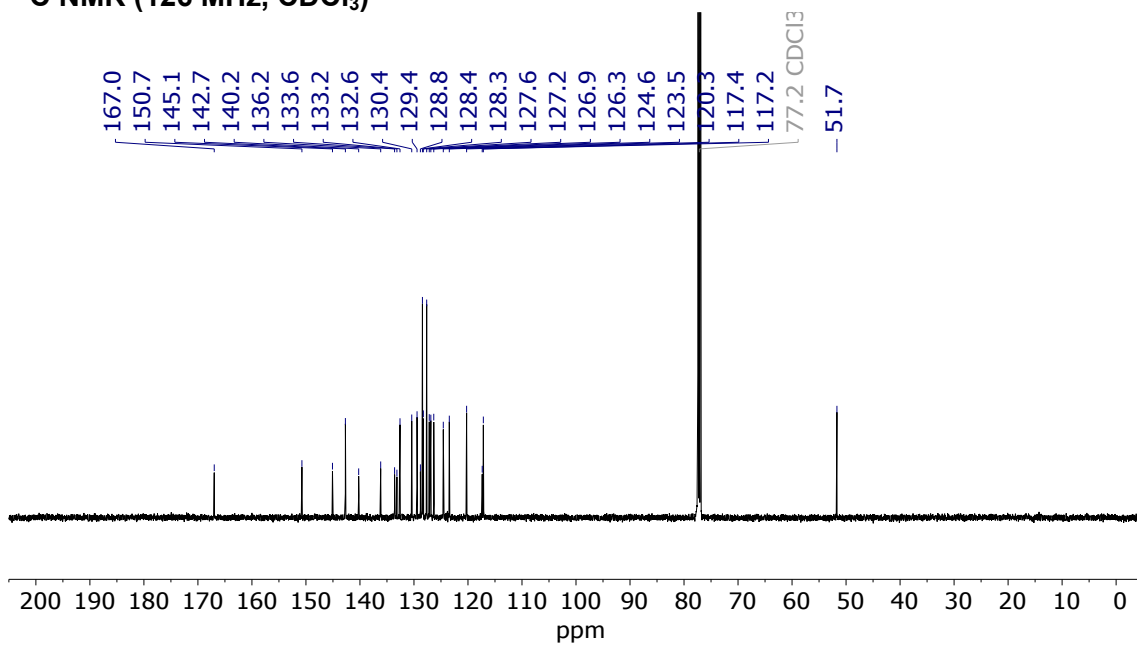

**<sup>1</sup>H NMR (500 MHz, CDCl<sub>3</sub>)**

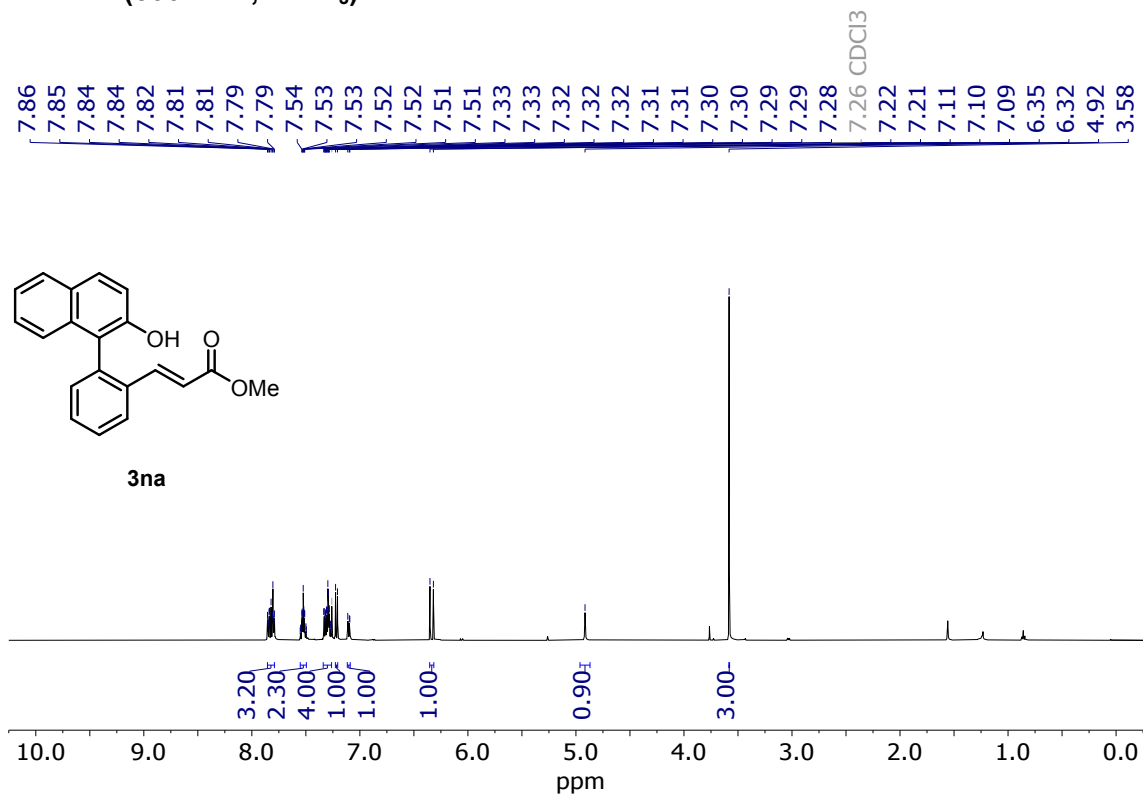

**DEPT-135**

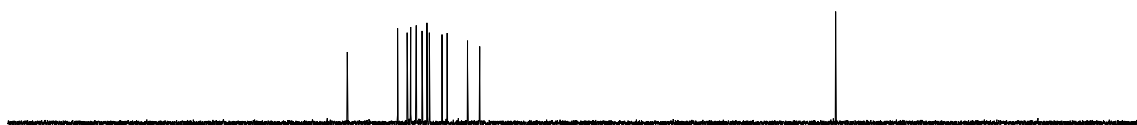

**<sup>13</sup>C NMR (126 MHz, CDCl<sub>3</sub>)**

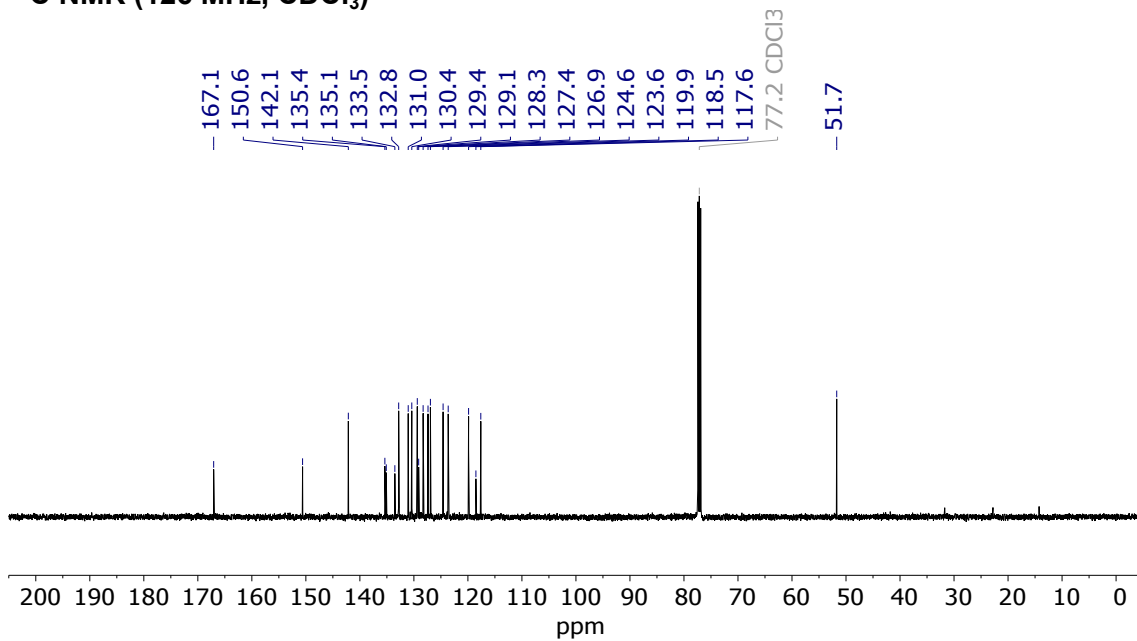

**<sup>1</sup>H NMR (500 MHz, CDCl<sub>3</sub>)**

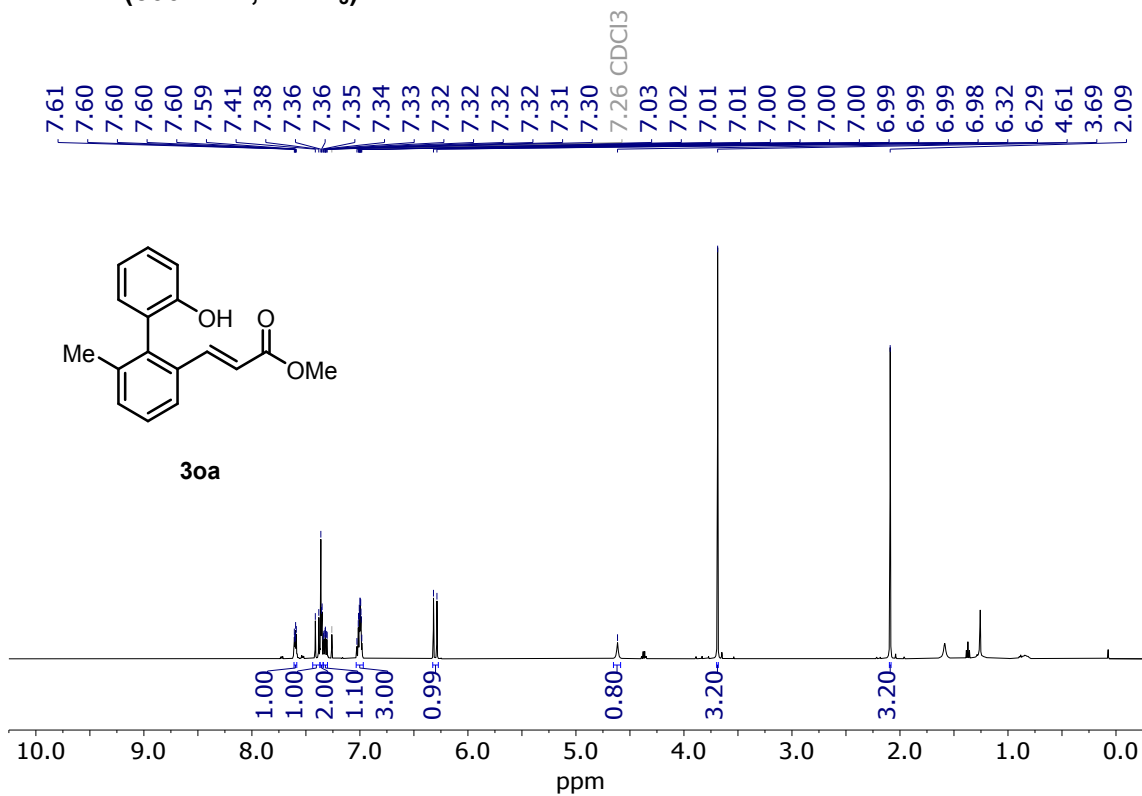

**DEPT-135**

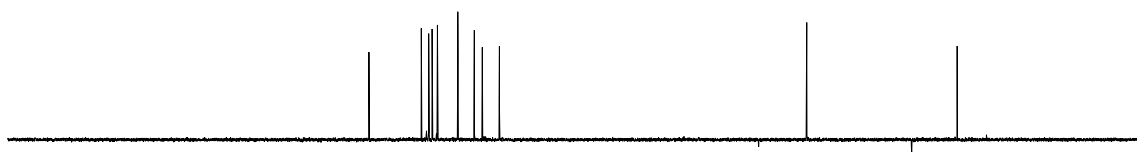

**<sup>13</sup>C NMR (126 MHz, CDCl<sub>3</sub>)**

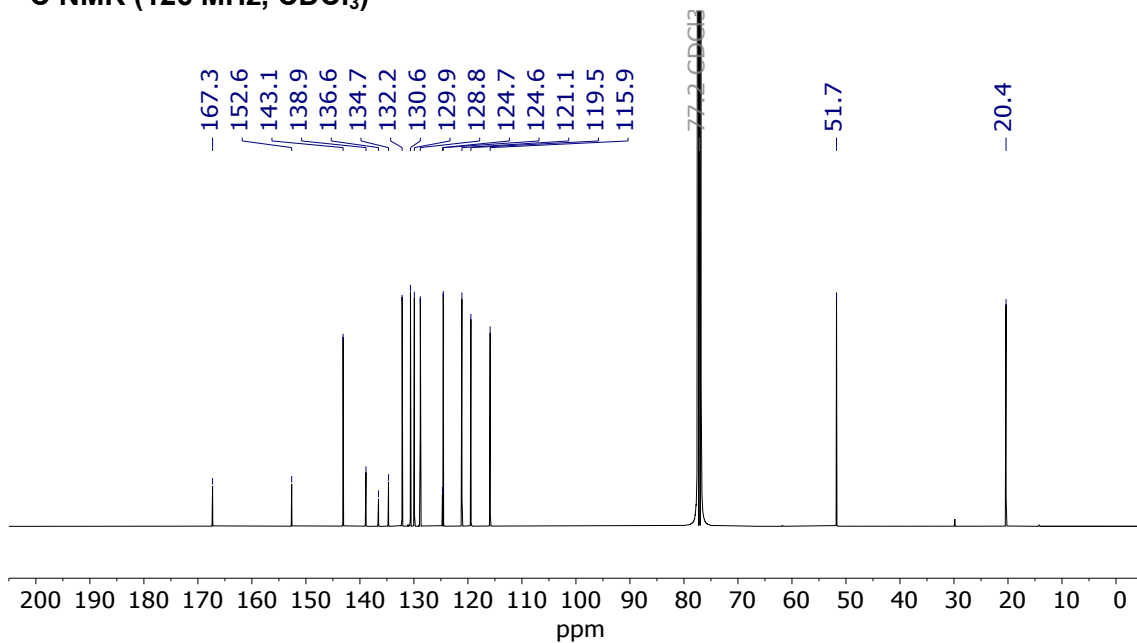

**<sup>1</sup>H NMR (500 MHz, CDCl<sub>3</sub>)**

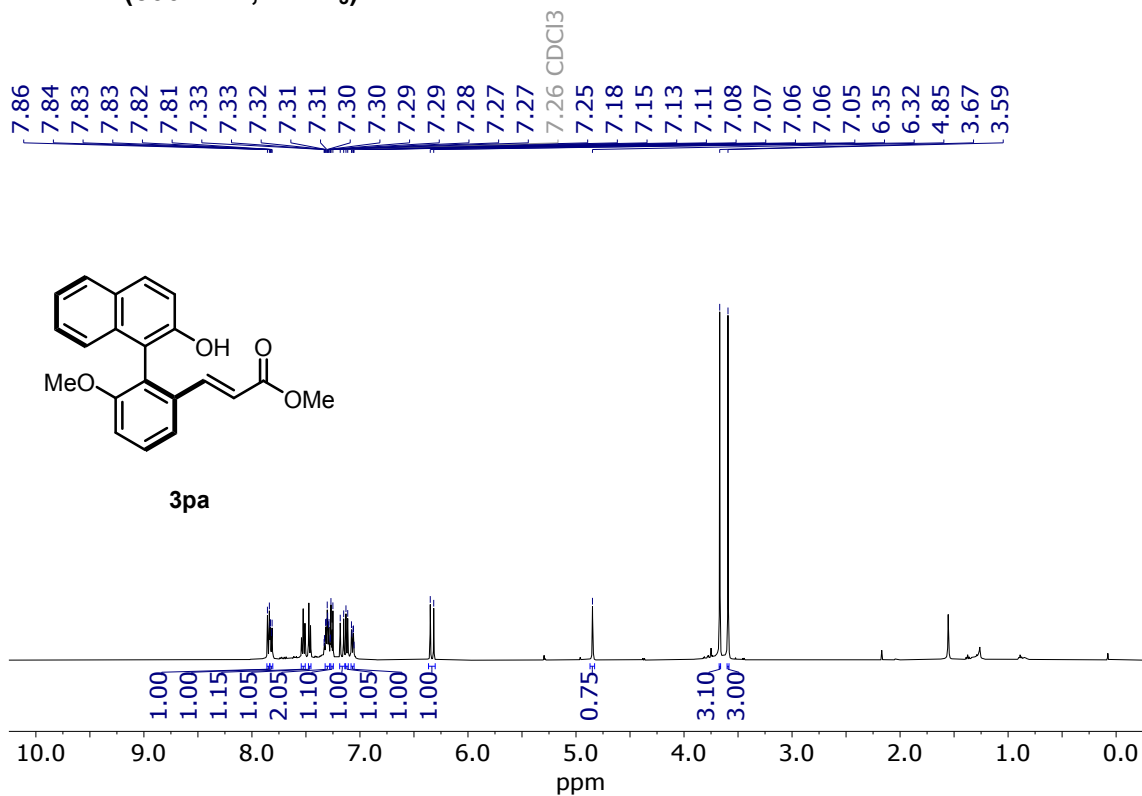

**DEPT-135**

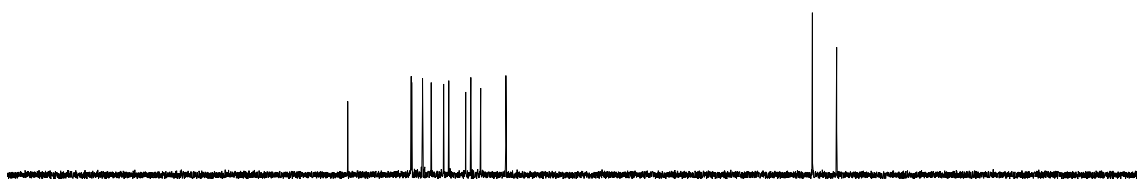

**<sup>13</sup>C NMR (126 MHz, CDCl<sub>3</sub>)**

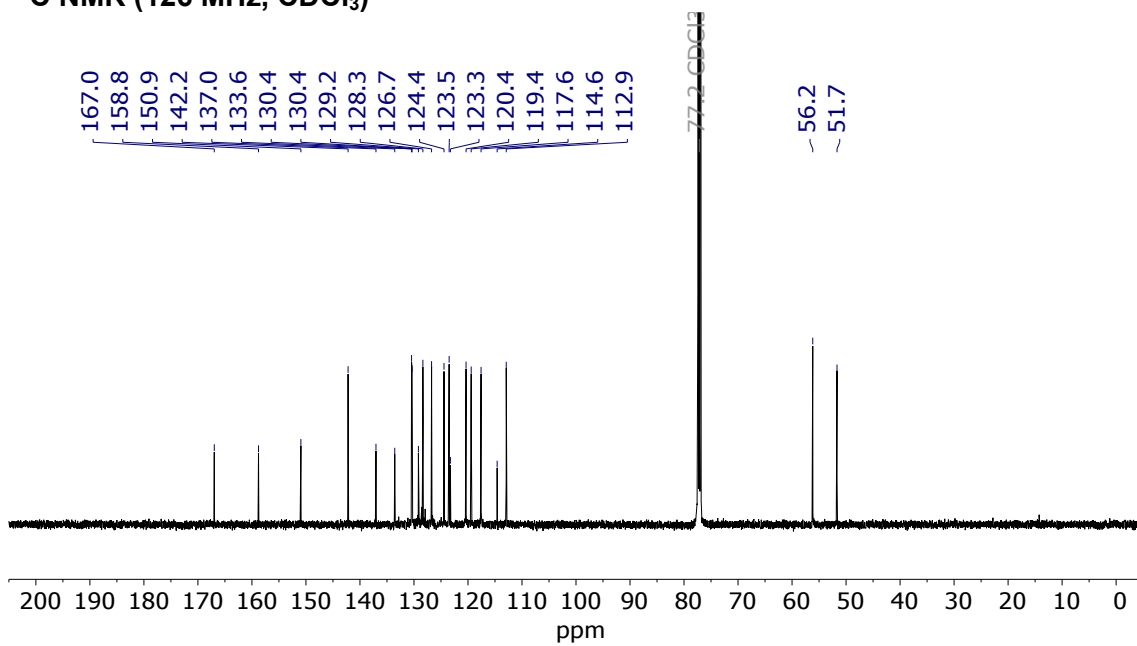



**<sup>1</sup>H NMR (300 MHz, CDCl<sub>3</sub>)**

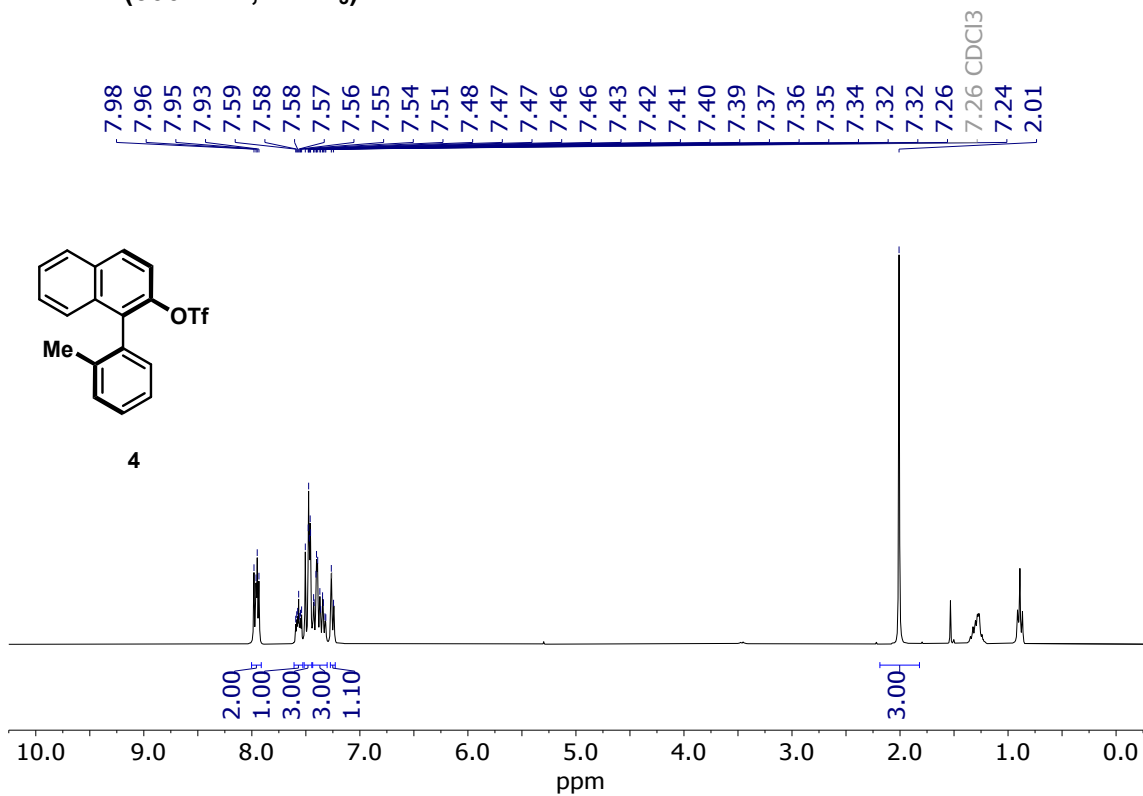

**DEPT-135**

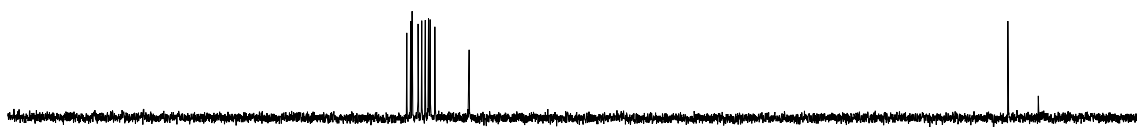

**<sup>13</sup>C NMR (75 MHz, CDCl<sub>3</sub>)**

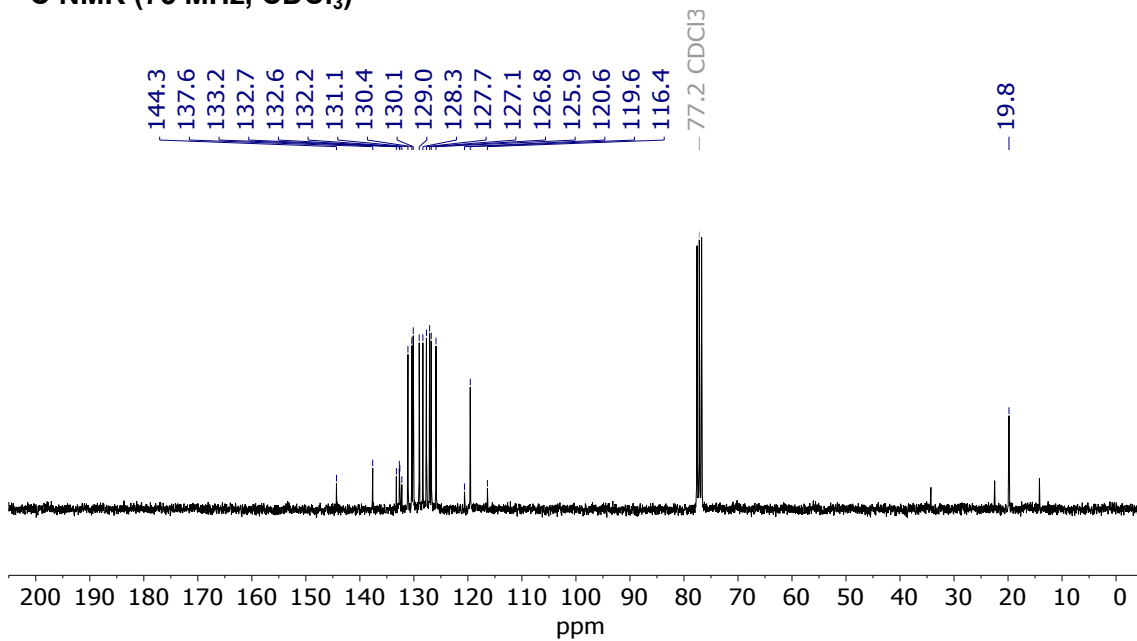

**<sup>1</sup>H NMR (500 MHz, CDCl<sub>3</sub>)**

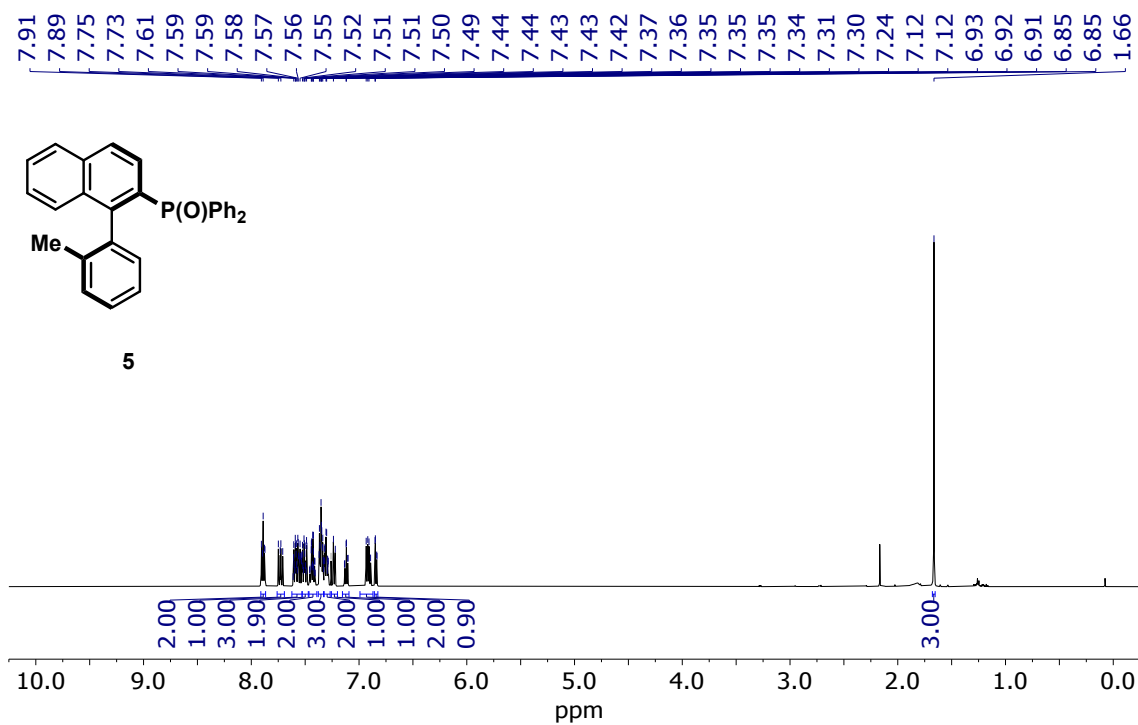

**DEPT-135**

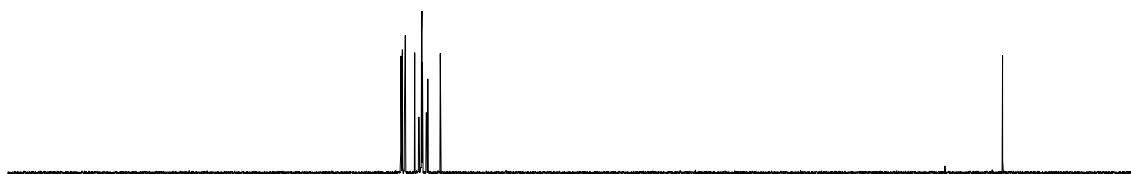

**<sup>13</sup>C NMR (126 MHz, CDCl<sub>3</sub>)**

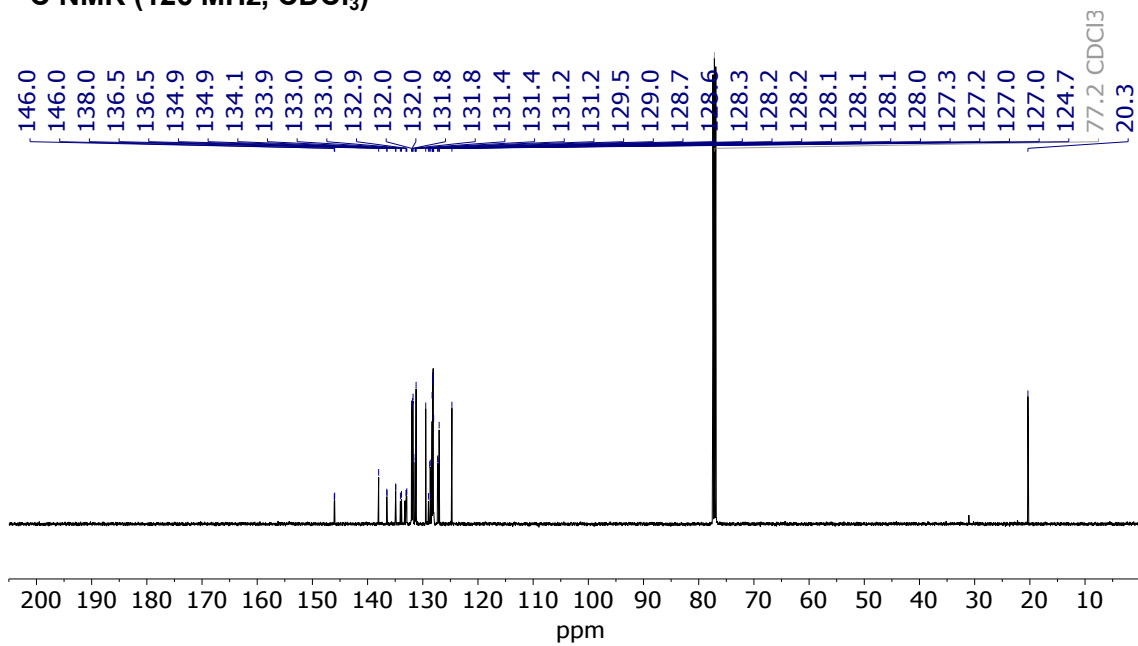

**<sup>1</sup>H NMR (500 MHz, CDCl<sub>3</sub>)**

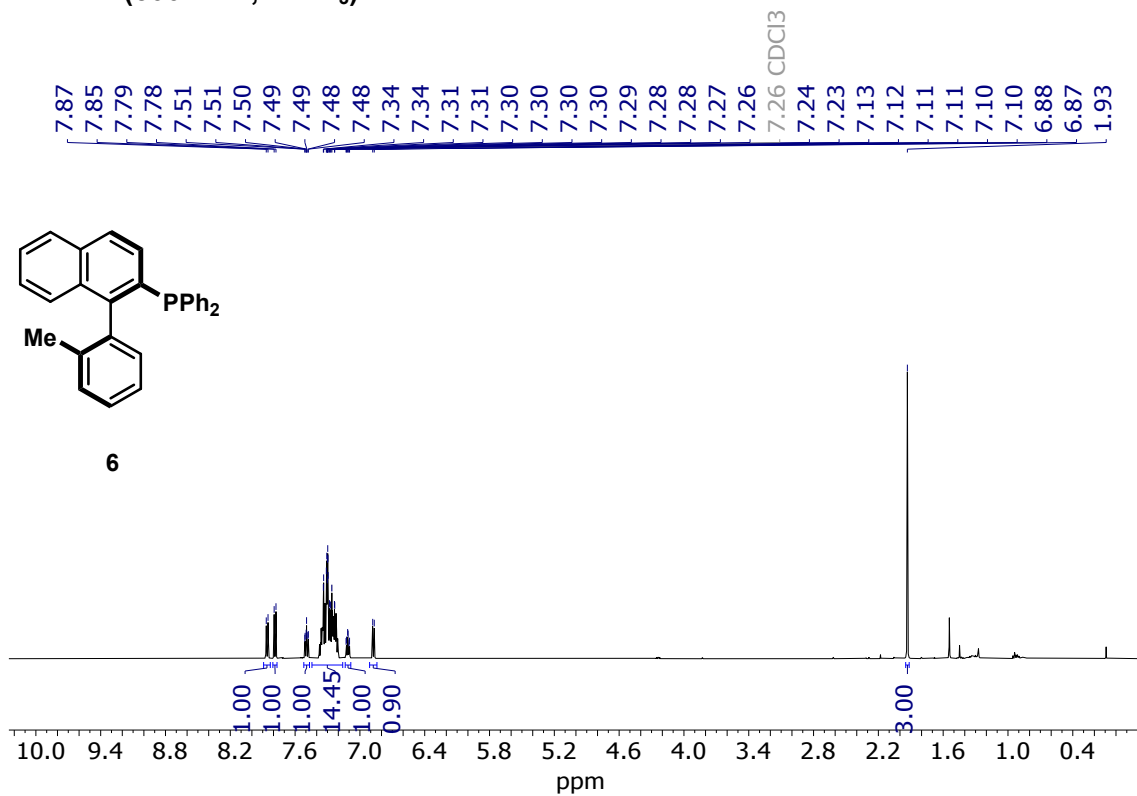

**DEPT-135**

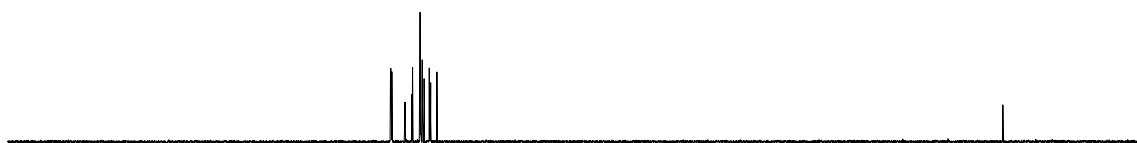

**<sup>13</sup>C NMR (126 MHz, CDCl<sub>3</sub>)**

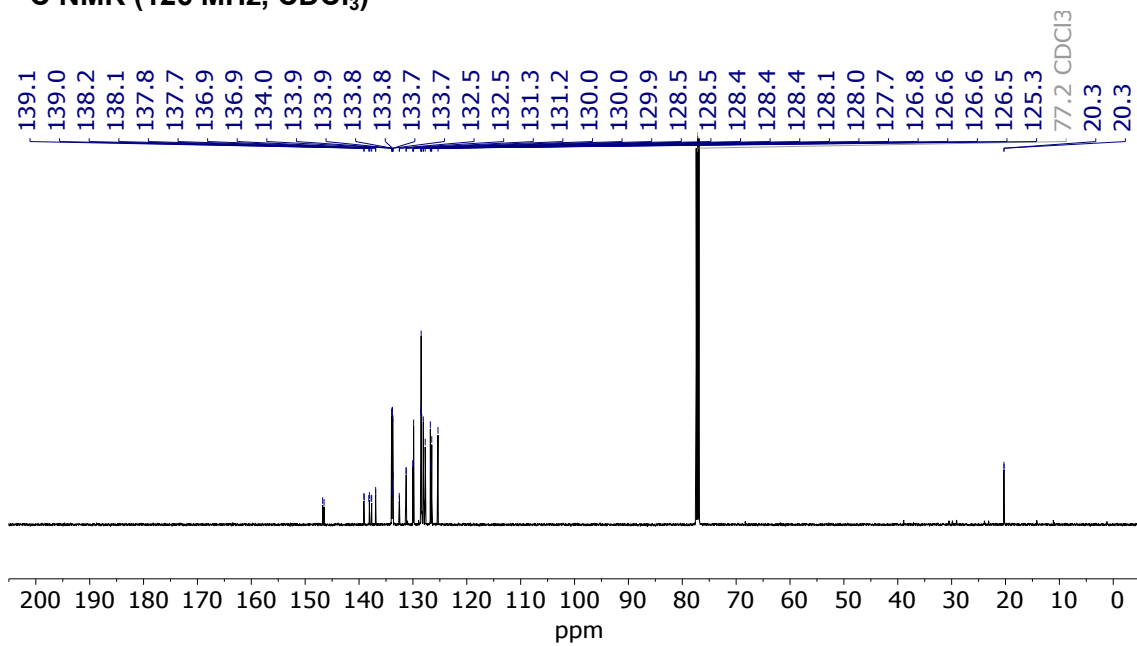

**<sup>1</sup>H NMR (300 MHz, CDCl<sub>3</sub>)**

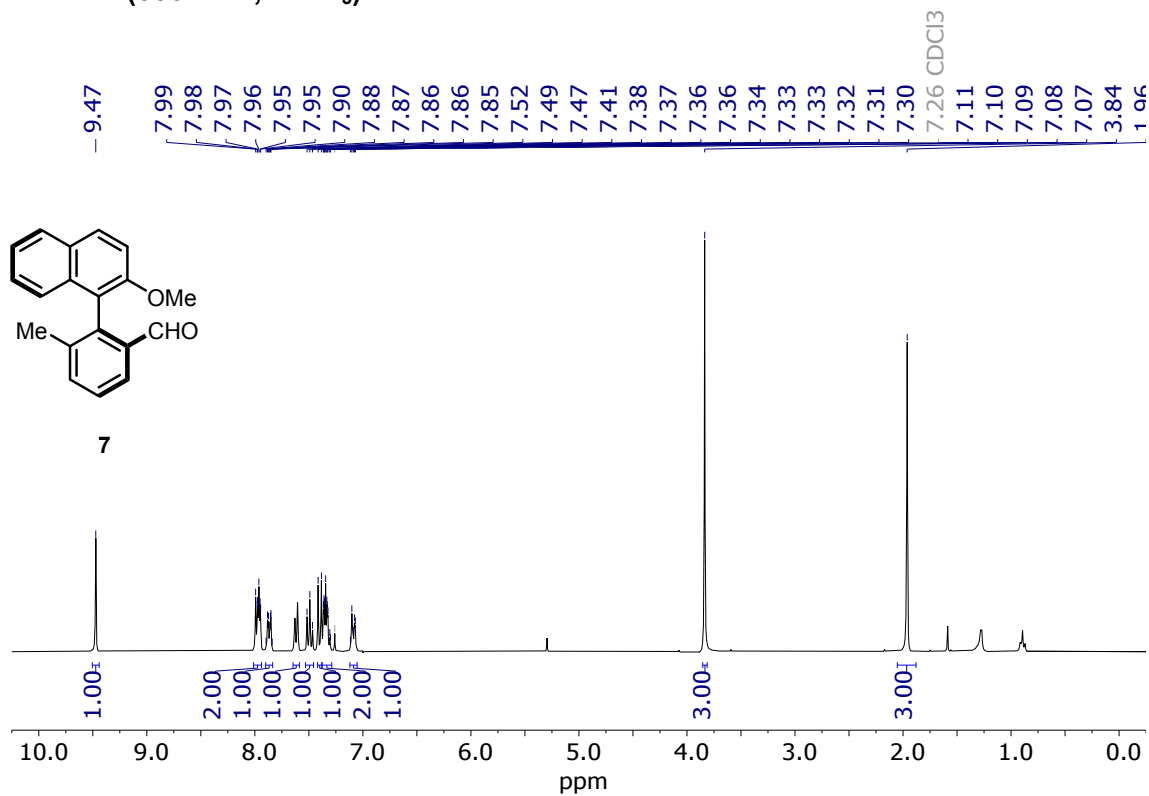

**DEPT-135**

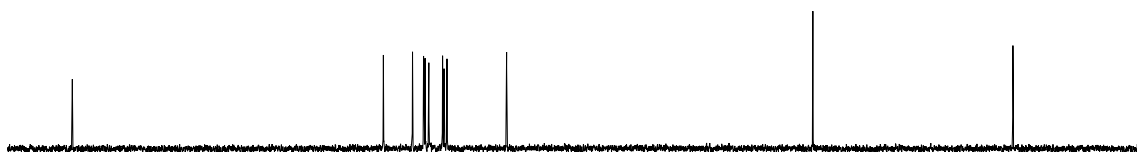

**<sup>13</sup>C NMR (75 MHz, CDCl<sub>3</sub>)**

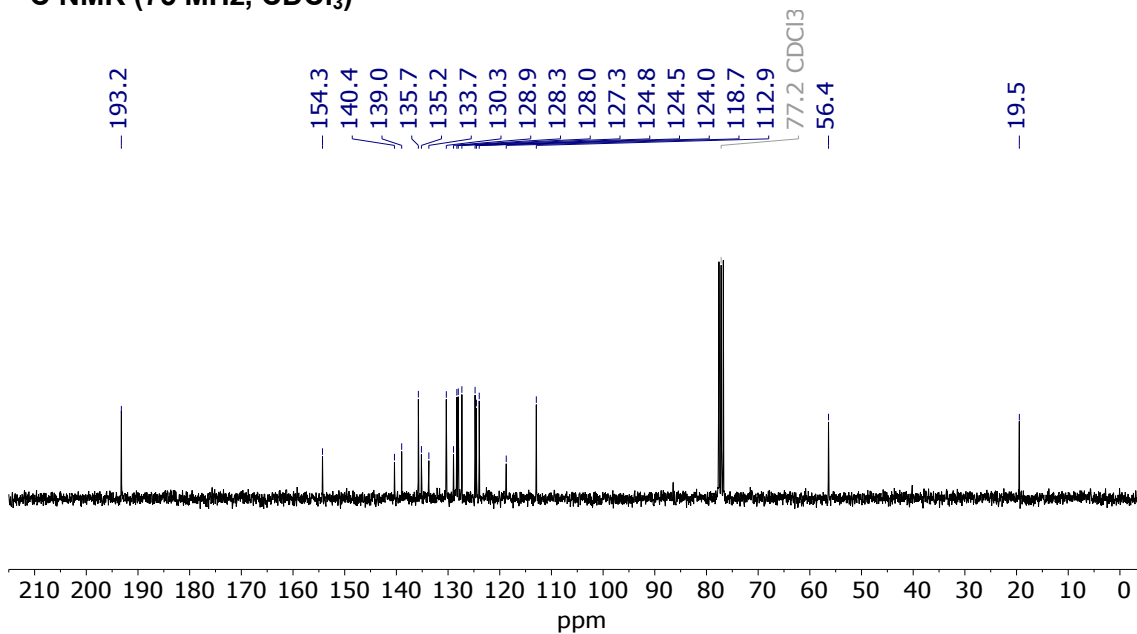

**<sup>1</sup>H NMR (300 MHz, CDCl<sub>3</sub>)**

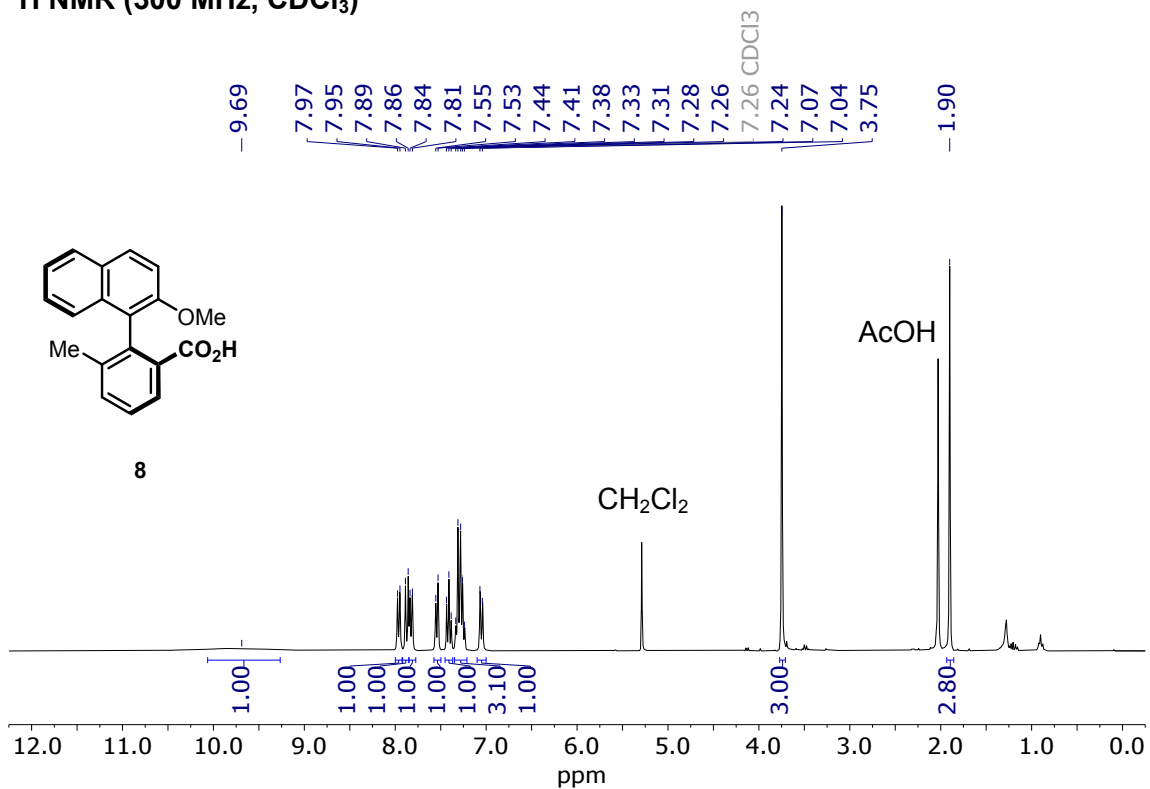

**DEPT-135**

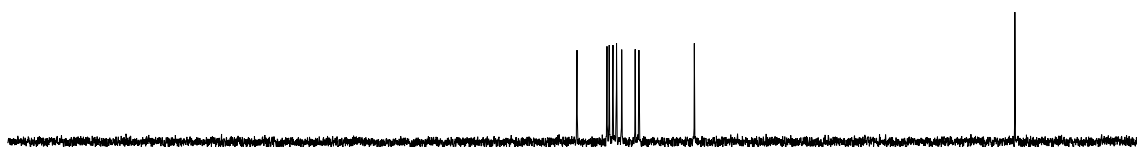

**<sup>13</sup>C NMR (75 MHz, CDCl<sub>3</sub>)**

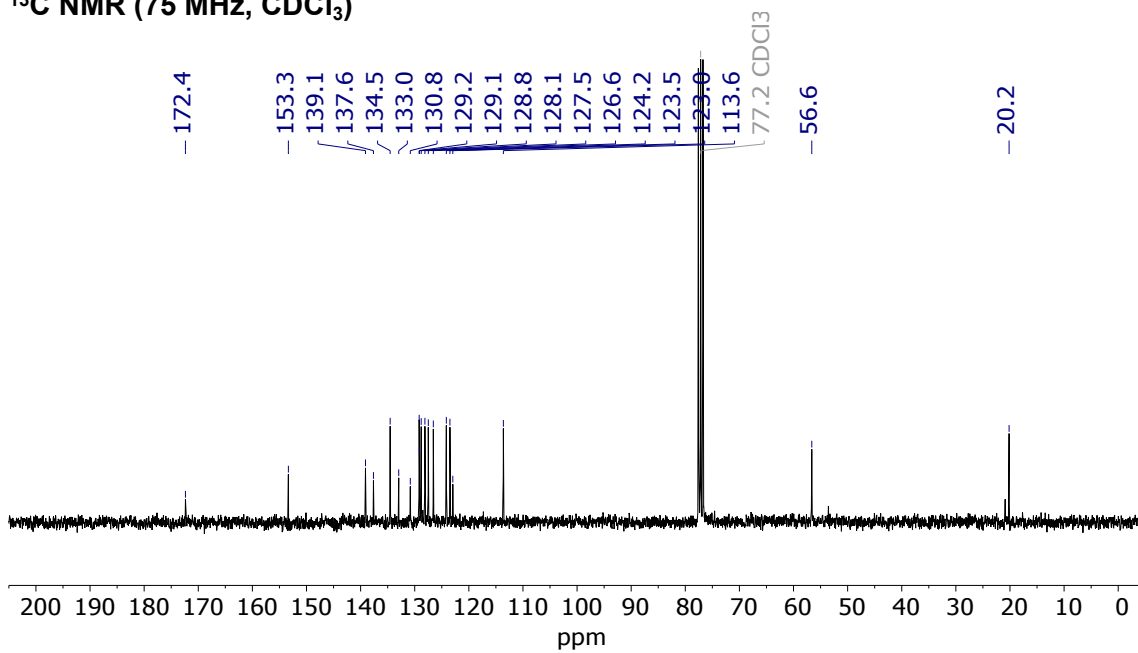

**<sup>1</sup>H NMR (300 MHz, CDCl<sub>3</sub>)**

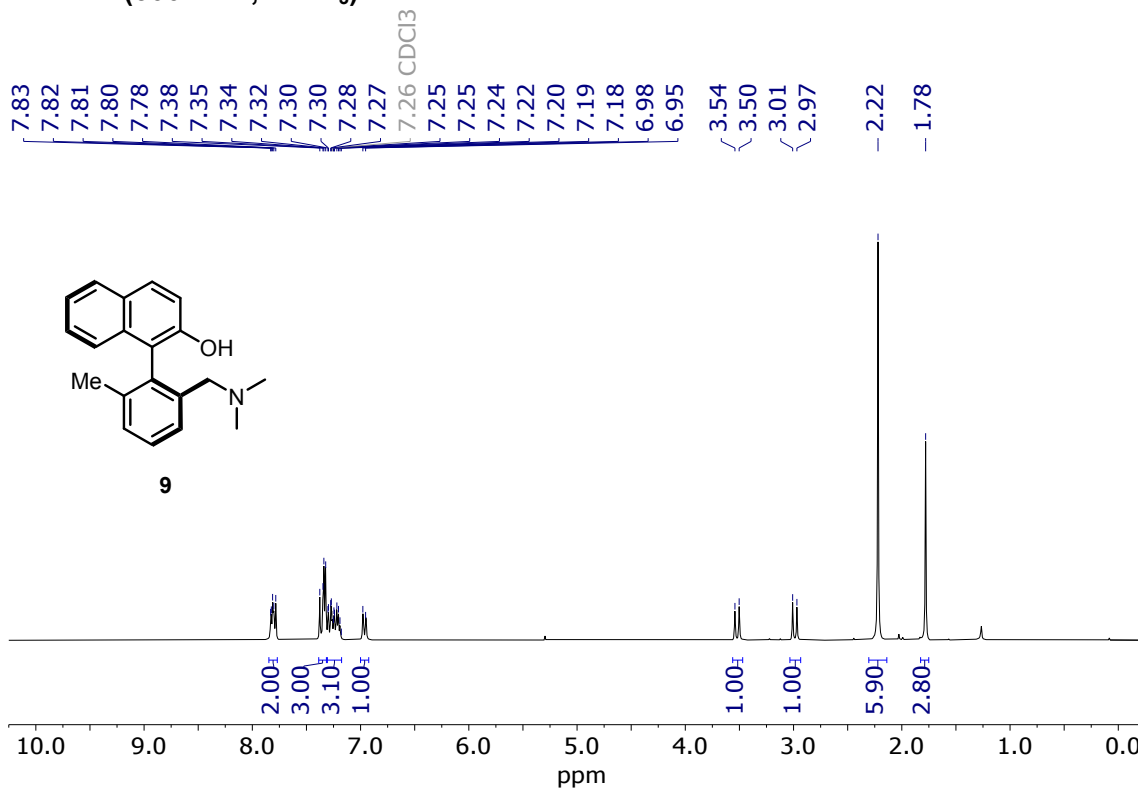

**DEPT-135**

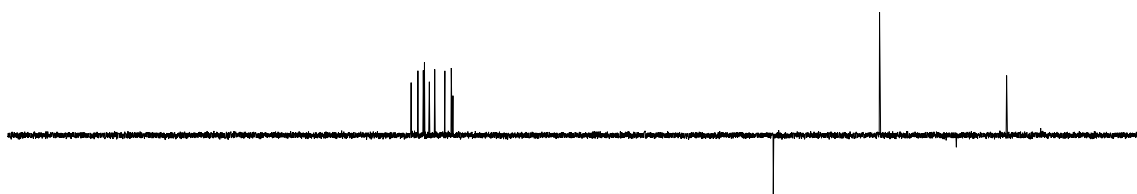

**<sup>13</sup>C NMR (75 MHz, CDCl<sub>3</sub>)**

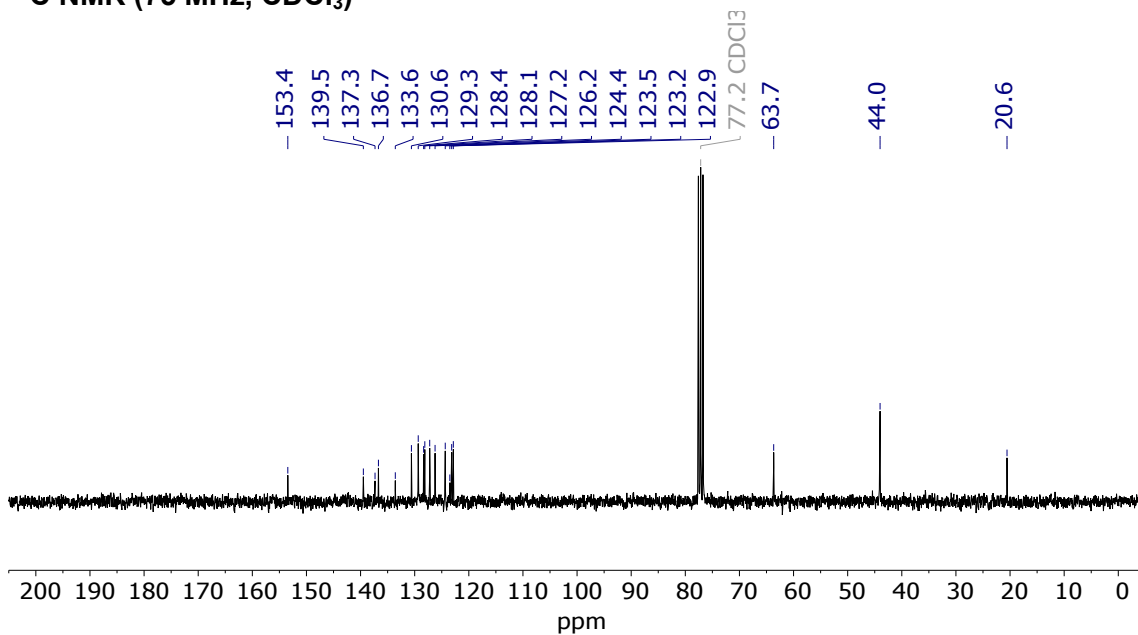

**<sup>1</sup>H NMR (300 MHz, CDCl<sub>3</sub>)**

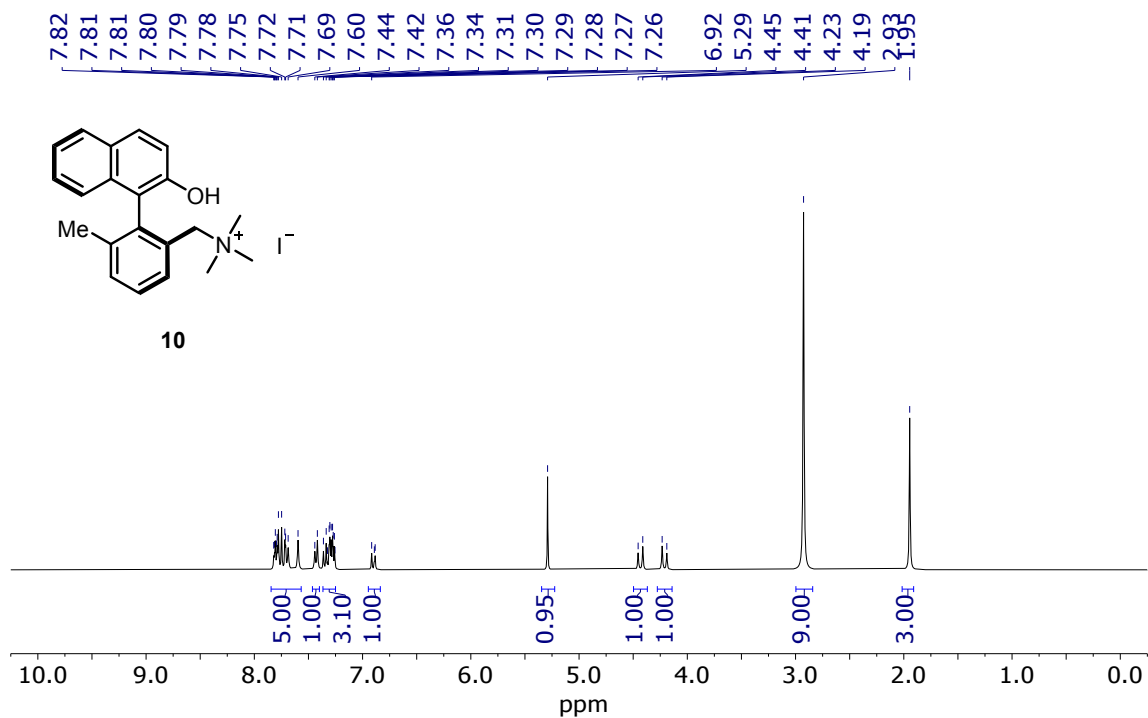

**DEPT-135**

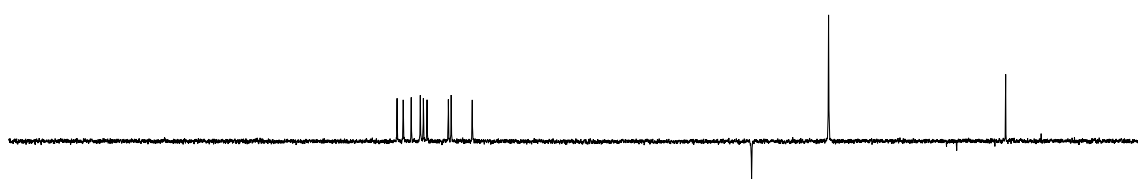

**<sup>13</sup>C NMR (75 MHz, CDCl<sub>3</sub>)**

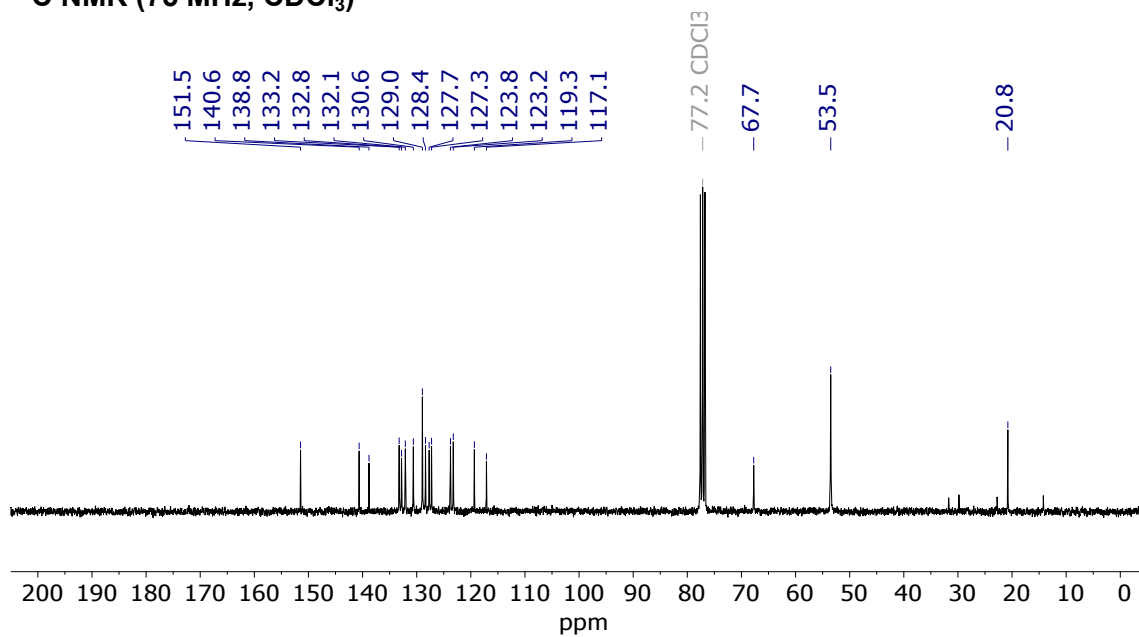

**<sup>1</sup>H NMR (300 MHz, CDCl<sub>3</sub>)**

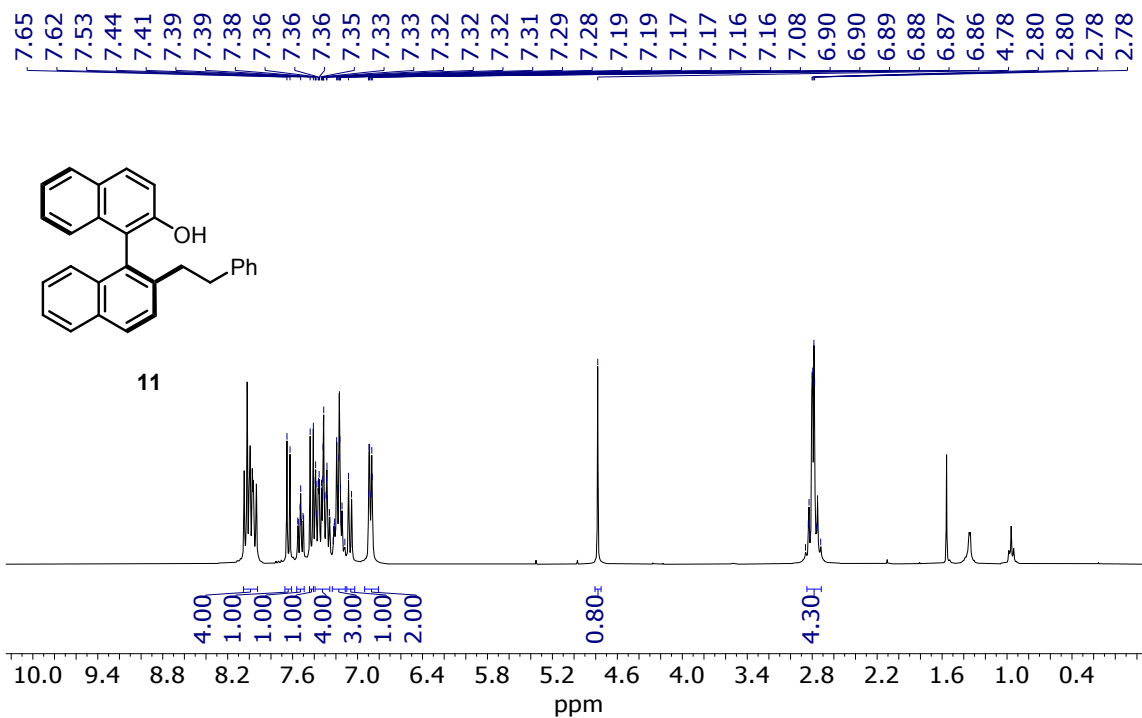

**DEPT-135**

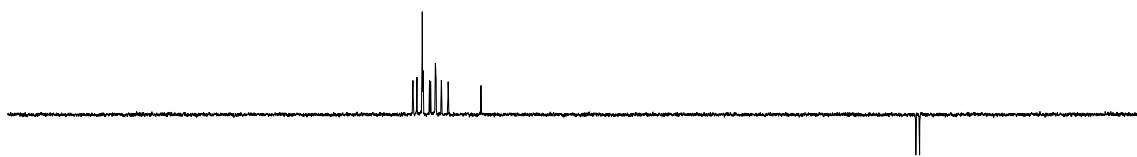

**<sup>13</sup>C NMR (75 MHz, CDCl<sub>3</sub>)**

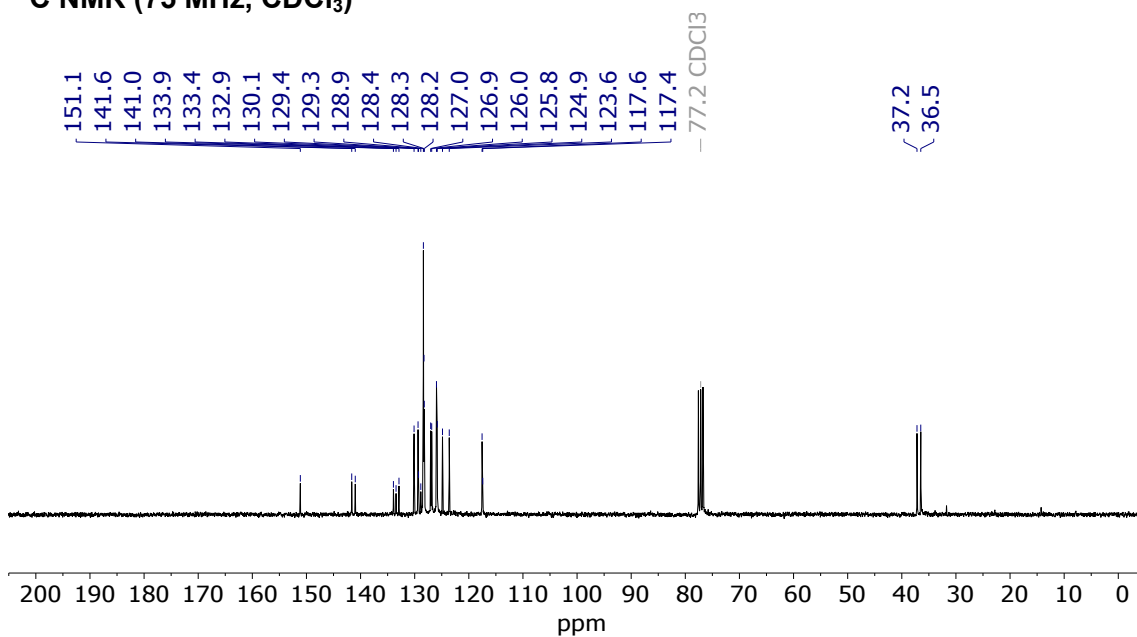



**<sup>1</sup>H NMR (300 MHz, CDCl<sub>3</sub>)**

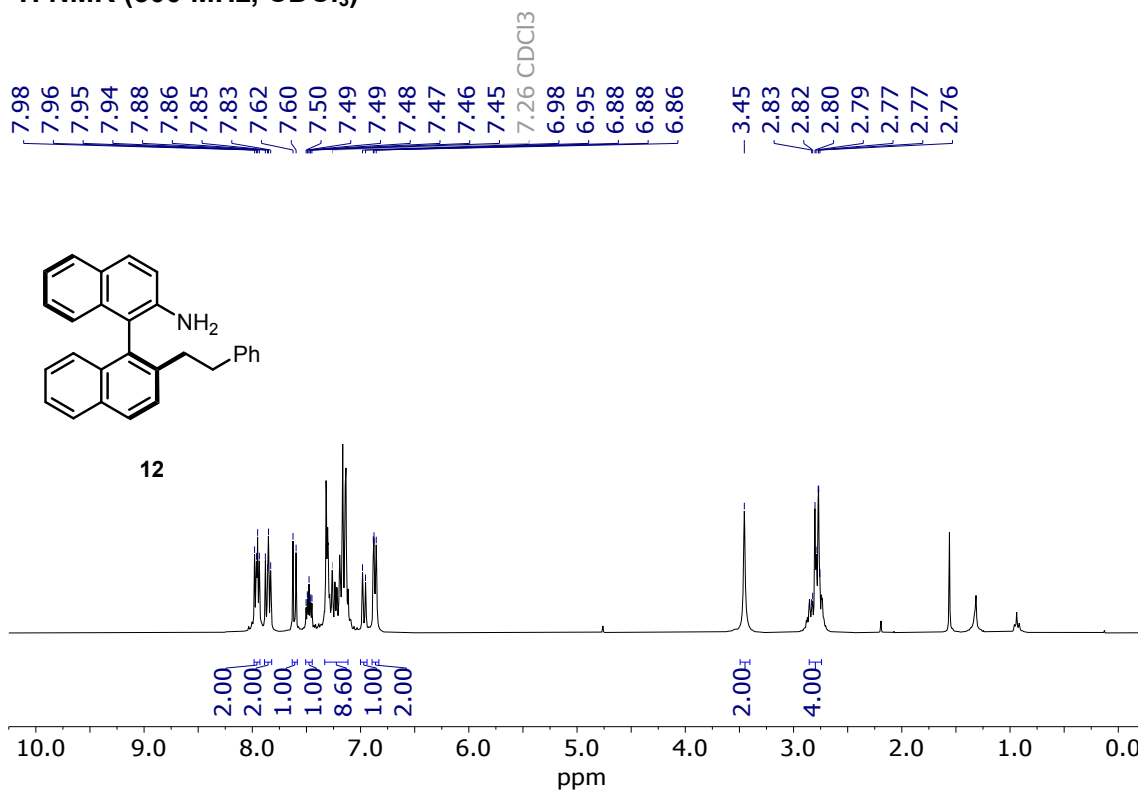

**DEPT-135**

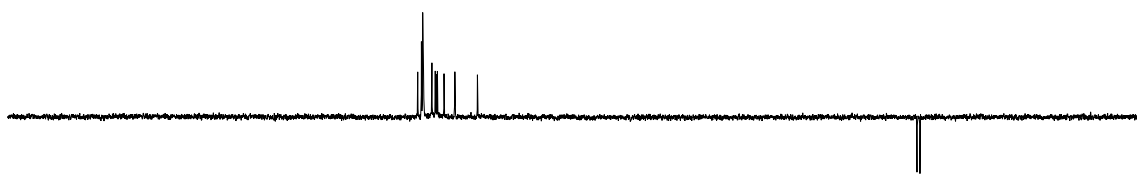

**<sup>13</sup>C NMR (75 MHz, CDCl<sub>3</sub>)**

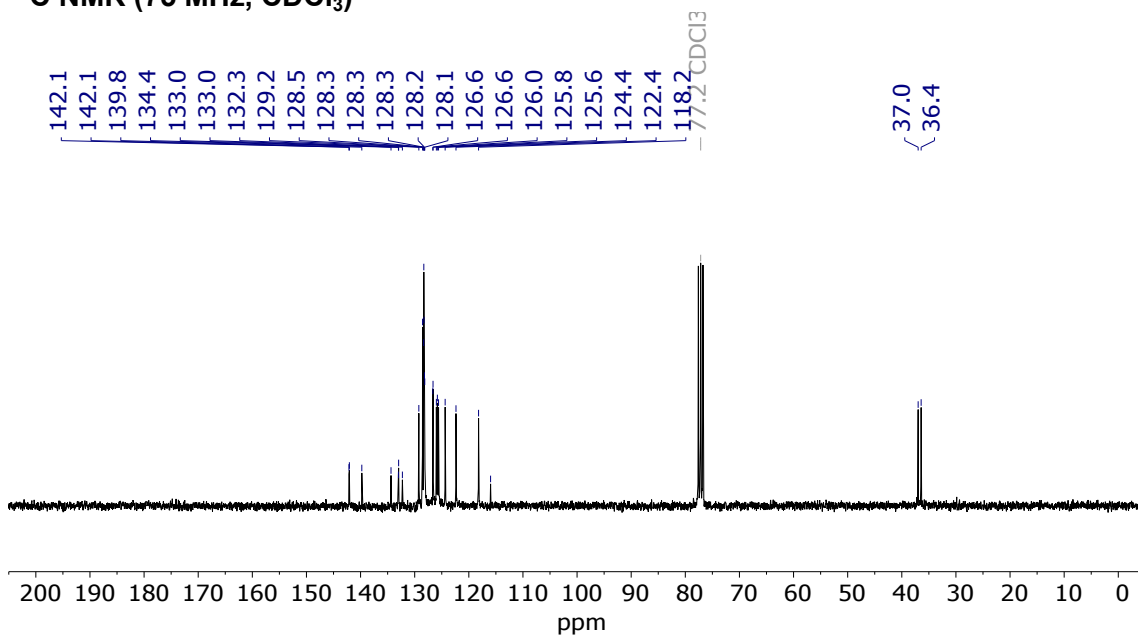

Supplement: cs3c03867_si_001.pdf [file cs3c03867_si_001.pdf]
